# Supplementary material for: Transcriptome Analysis of the Anti-TGFβ Effect of Schisandra chinensis Fruit Extract and Schisandrin B in A7r5 Vascular Smooth Muscle Cells
Source: Life (Basel). 2021 Feb 20;11(2):163. doi: 10.3390/life11020163 (PMC7926316; doi:10.3390/life11020163)
Supplement: Supplementary file 1 [file life-11-00163-s001.xlsx]

## Sheet: TableS1_UpReg_TGFb1_vs_Vehicle
Supplementary Table 1. List of 1,969 genes up-regulated in TGFβ1 compared to Vehicle-treated A7r5 cells
EntrezGeneID	Symbol	Description	LogFC1	AveExpr2	t-value3	p-value4	q-value5	Log-odd6
24329	Egfr	epidermal growth factor receptor	2.00876	0.0732208	4.60574	0.00101559	0.0556973	-0.436583
24367	Fgg	fibrinogen gamma chain	2.20096	0.212176	4.71921	0.000856198	0.0556973	-0.286522
24511	Itgb1	integrin subunit beta 1	2.04422	0.358845	4.69241	0.000891282	0.0556973	-0.321763
24517	Junb	JunB proto-oncogene, AP-1 transcription factor subunit	1.81994	0.652518	4.07635	0.00230695	0.0556973	-1.16557
24552	Me1	malic enzyme 1	2.51796	0.0928673	5.14895	0.000456101	0.0556973	0.261164
24586	Ncam1	neural cell adhesion molecule 1	1.84109	0.0620752	4.23605	0.00179381	0.0556973	-0.940793
24683	Prl	prolactin	1.84977	0.518517	3.95582	0.00279558	0.0556973	-1.33784
24907	Dmd	dystrophin	2.20211	0.233683	4.28129	0.00167147	0.0556973	-0.877861
24914	Lox	lysyl oxidase	2.03894	0.250684	4.48813	0.00121453	0.0556973	-0.594472
24915	Pdlim4	PDZ and LIM domain 4	1.8769	-0.366445	4.09	0.00225754	0.0556973	-1.14619
24957	Glul	glutamate-ammonia ligase	2.00744	-0.534095	4.22734	0.00181843	0.0556973	-0.952942
25107	Avpr1a	arginine vasopressin receptor 1A	1.90311	-0.0693592	4.28996	0.00164905	0.0556973	-0.86584
25123	Tagln	transgelin	1.88054	0.173099	4.02074	0.00252017	0.0556973	-1.24477
25156	Vav1	vav guanine nucleotide exchange factor 1	2.67696	-0.333487	4.52891	0.00114125	0.0556973	-0.539465
25266	Pdgfa	platelet derived growth factor subunit A	2.16685	-0.0380347	5.00277	0.000563384	0.0556973	0.0785465
25304	Comp	cartilage oligomeric matrix protein	2.34992	0.307209	4.31628	0.0015829	0.0556973	-0.829415
25415	Crmp1	collapsin response mediator protein 1	2.1151	0.311653	4.83191	0.000723987	0.0556973	-0.139726
25466	Il1rap	interleukin 1 receptor accessory protein	2.16074	0.361624	4.70835	0.000870239	0.0556973	-0.300792
25507	Pcsk6	proprotein convertase subtilisin/kexin type 6	1.86171	0.437701	4.17197	0.00198352	0.0556973	-1.03049
25521	Prkar1b	protein kinase cAMP-dependent type 1 regulatory subunit beta	1.77756	-0.0619976	4.03514	0.00246304	0.0556973	-1.22422
25556	Il1rl1	interleukin 1 receptor-like 1	2.02745	0.379081	4.49376	0.00120414	0.0556973	-0.586869
25584	F3	coagulation factor III, tissue factor	2.27413	0.120913	5.13954	0.000462304	0.0556973	0.249521
25614	Ptk2	protein tyrosine kinase 2	2.36676	-0.148357	4.40553	0.00137875	0.0556973	-0.706788
25639	Fkbp1a	FKBP prolyl isomerase 1A	2.00886	0.0730057	4.19765	0.00190508	0.0556973	-0.994468
25693	Slc18a1	solute carrier family 18 member A1	1.97754	0.109921	4.53061	0.0011383	0.0556973	-0.537178
26759	Acot7	acyl-CoA thioesterase 7	2.04253	-0.262636	4.34301	0.00151859	0.0556973	-0.792546
29276	Csrp1	cysteine and glycine-rich protein 1	1.9464	0.341942	4.17725	0.00196714	0.0556973	-1.02309
29317	Csrp2	cysteine and glycine-rich protein 2	2.00252	-0.223952	4.61173	0.00100644	0.0556973	-0.428607
29380	Phlda1	pleckstrin homology-like domain, family A, member 1	2.24449	0.381791	4.6434	0.000959454	0.0556973	-0.386532
29461	Vgf	VGF nerve growth factor inducible	2.17923	-0.243894	4.88395	0.000670443	0.0556973	-0.0726977
29517	Sgk1	serum/glucocorticoid regulated kinase 1	2.03036	0.695684	4.30074	0.0016216	0.0556973	-0.850904
29556	Myh6	myosin heavy chain 6	2.3937	-0.0691347	5.51458	0.000272515	0.0556973	0.701288
29579	Esyt1	extended synaptotagmin 1	2.03455	0.0692774	4.20411	0.00188585	0.0556973	-0.985417
29592	Bcat1	branched chain amino acid transaminase 1	2.31035	0.295546	4.04722	0.00241614	0.0556973	-1.20699
29602	Ptgfrn	prostaglandin F2 receptor inhibitor	2.02838	-0.158687	4.68134	0.000906213	0.0556973	-0.336353
29618	Btg1	BTG anti-proliferation factor 1	2.10543	0.285172	4.68432	0.000902167	0.0556973	-0.332423
50563	Gja5	gap junction protein, alpha 5	2.12651	-0.171536	4.2634	0.00171877	0.0556973	-0.902713
50692	Plaur	plasminogen activator, urokinase receptor	2.18468	0.276382	4.6406	0.000963508	0.0556973	-0.390241
54230	Btg3	BTG anti-proliferation factor 3	2.10229	0.1547	4.54888	0.00110708	0.0556973	-0.512627
54281	Furin	furin (paired basic amino acid cleaving enzyme)	2.18193	0.108396	4.86099	0.000693531	0.0556973	-0.102216
56759	Rnase4	ribonuclease A family member 4	2.10958	-0.10934	4.72474	0.000849145	0.0556973	-0.279267
58817	Sec23a	Sec23 homolog A, coat complex II component	1.95975	-0.406234	4.04801	0.00241311	0.0556973	-1.20587
58868	Fzd1	frizzled class receptor 1	1.76787	-0.0417613	3.96903	0.00273707	0.0556973	-1.31885
58950	Fkbp1b	FKBP prolyl isomerase 1B	2.19969	-0.0054456	4.32127	0.0015707	0.0556973	-0.822533
59106	Ltbp2	latent transforming growth factor beta binding protein 2	2.38328	-0.184034	5.26652	0.000385691	0.0556973	0.405275
59115	Ninj2	ninjurin 2	1.99935	0.122693	4.04199	0.00243633	0.0556973	-1.21445
59295	Nucb2	nucleobindin 2	2.05146	0.167064	4.34805	0.0015068	0.0556973	-0.785618
60338	Fxyd5	FXYD domain-containing ion transport regulator 5	2.15444	0.617571	4.77176	0.000791611	0.0556973	-0.217798
64157	Ddah1	dimethylarginine dimethylaminohydrolase 1	1.96223	0.347246	4.50615	0.00118155	0.0556973	-0.570127
64185	Cap1	cyclase associated actin cytoskeleton regulatory protein 1	2.09007	0.0839522	4.09851	0.00222735	0.0556973	-1.13414
64457	Ndrg4	NDRG family member 4	2.01455	-0.422944	4.62145	0.000991771	0.0556973	-0.415683
64508	Adcy3	adenylate cyclase 3	2.56033	-0.236488	4.3159	0.00158386	0.0556973	-0.829953
64511	Fntb	farnesyltransferase, CAAX box, beta	2.32486	-0.258115	5.0183	0.000550802	0.0556973	0.0981257
64521	Tspan2	tetraspanin 2	2.10876	0.128334	4.85032	0.000704539	0.0556973	-0.115956
64845	Gphn	gephyrin	1.90427	-0.0728044	3.96426	0.00275804	0.0556973	-1.3257
65049	Megf6	multiple EGF-like-domains 6	2.10732	-0.0411292	4.70702	0.000871975	0.0556973	-0.30254
79558	Acvr1	activin A receptor type 1	1.91831	0.16478	4.10173	0.00221601	0.0556973	-1.12957
81653	Dbn1	drebrin 1	2.17428	-0.552885	4.34544	0.0015129	0.0556973	-0.789209
81679	Jup	junction plakoglobin	2.09559	0.416973	4.15696	0.00203095	0.0556973	-1.0516
81782	Soat1	sterol O-acyltransferase 1	2.07222	0.252894	4.37624	0.00144248	0.0556973	-0.746878
81826	Slc20a1	solute carrier family 20 member 1	1.80723	0.267172	4.08406	0.0022789	0.0556973	-1.15462
83718	Clic4	chloride intracellular channel 4	2.22889	0.33358	5.14081	0.000461457	0.0556973	0.251101
83727	Fbn1	fibrillin 1	1.83465	0.019738	3.99644	0.00261974	0.0556973	-1.27953
83730	Vamp8	vesicle-associated membrane protein 8	1.93908	-0.484104	4.15566	0.00203513	0.0556973	-1.05344
83838	Ltbp3	latent transforming growth factor beta binding protein 3	2.12494	-0.0370697	4.5019	0.00118925	0.0556973	-0.575872
84394	Dcx	doublecortin	1.97746	0.0142345	4.38113	0.00143164	0.0556973	-0.74018
84578	Hdac3	histone deacetylase 3	2.29688	-0.667377	4.30523	0.00161033	0.0556973	-0.844696
85385	Shc1	SHC adaptor protein 1	2.36406	-0.124682	5.13166	0.000467565	0.0556973	0.239764
85428	Rhoq	ras homolog family member Q	2.01591	0.114502	4.59857	0.00102668	0.0556973	-0.446147
85483	Ciita	class II, major histocompatibility complex, transactivator	2.32484	0.11049	4.47778	0.00123392	0.0556973	-0.608481
85496	Enpp1	ectonucleotide pyrophosphatase/phosphodiesterase 1	1.87756	0.106468	4.26827	0.00170575	0.0556973	-0.895938
89787	Lrp3	LDL receptor related protein 3	2.3766	-0.0103539	4.26068	0.00172607	0.0556973	-0.906488
89816	Picalm	phosphatidylinositol binding clathrin assembly protein	2.10274	0.466846	4.03589	0.00246008	0.0556973	-1.22314
89818	Vamp5	vesicle-associated membrane protein 5	2.11455	-0.0983379	4.71699	0.000859049	0.0556973	-0.289438
89823	Trpc6	transient receptor potential cation channel, subfamily C, member 6	2.42939	0.12956	5.34215	0.000346612	0.0556973	0.496687
94340	Acsl5	acyl-CoA synthetase long-chain family member 5	2.00302	0.255461	4.13933	0.00208818	0.0556973	-1.07644
112400	Nrg1	neuregulin 1	1.7784	0.121064	4.01499	0.00254336	0.0556973	-1.25299
113940	Gmfg	glia maturation factor, gamma	2.39079	-0.410884	4.72294	0.000851437	0.0556973	-0.281631
114031	Fstl3	follistatin like 3	2.26145	0.197985	5.21955	0.000412314	0.0556973	0.347999
114208	Skil	SKI-like proto-oncogene	2.11098	-0.0575042	4.89596	0.000658697	0.0556973	-0.0572986
114506	Ankh	ANKH inorganic pyrophosphate transport regulator	2.0498	0.962861	4.05057	0.0024033	0.0556973	-1.20222
114639	Zp3	zona pellucida glycoprotein 3	2.16211	-0.0254051	4.33656	0.00153387	0.0556973	-0.801443
114705	Rgs14	regulator of G-protein signaling 14	1.95287	0.00489227	4.09608	0.00223593	0.0556973	-1.13758
114901	Sorbs2	sorbin and SH3 domain containing 2	1.85921	0.606781	4.30095	0.00162109	0.0556973	-0.85062
116487	Tgfbi	transforming growth factor, beta induced	1.90462	-0.0479154	4.31734	0.0015803	0.0556973	-0.827951
116490	Snai1	snail family transcriptional repressor 1	1.88051	-0.19127	4.30162	0.00161939	0.0556973	-0.849686
116504	Mprip	myosin phosphatase Rho interacting protein	2.03702	0.160894	4.13591	0.0020995	0.0556973	-1.08127
116510	Timp1	TIMP metallopeptidase inhibitor 1	2.05107	0.154123	4.49686	0.00119843	0.0556973	-0.582672
116561	Cltb	clathrin, light chain B	2.25832	0.590332	4.96363	0.000596477	0.0556973	0.0290072
116601	Atp2a1	ATPase sarcoplasmic/endoplasmic reticulum Ca2+ transporting 1	1.99894	0.118935	4.21502	0.00185386	0.0556973	-0.970156
116660	Ptprn	protein tyrosine phosphatase, receptor type, N	2.04733	-0.333077	4.54014	0.00112189	0.0556973	-0.52436
116723	Pip4k2a	phosphatidylinositol-5-phosphate 4-kinase type 2 alpha	1.83852	0.155221	3.96456	0.0027567	0.0556973	-1.32526
117596	Atp6v1b2	ATPase H+ transporting V1 subunit B2	1.84351	-0.442103	4.21097	0.00186567	0.0556973	-0.975817
140586	Sox9	SRY box 9	2.40252	0.336794	5.47429	0.000288163	0.0556973	0.653943
140866	Dgka	diacylglycerol kinase, alpha	2.09842	0.36088	4.57024	0.00107172	0.0556973	-0.483992
170845	Ndel1	nudE neurodevelopment protein 1-like 1	1.88468	0.668483	4.06701	0.00234137	0.0556973	-1.17883
170851	Map2k1	mitogen activated protein kinase kinase 1	1.96011	-0.219602	4.4918	0.00120774	0.0556973	-0.589511
171040	Il11	interleukin 11	2.16799	0.222114	4.93305	0.000623779	0.0556973	-0.00989128
171112	Wfdc1	WAP four-disulfide core domain 1	1.89171	0.335997	4.32115	0.00157098	0.0556973	-0.822695
171434	Phldb1	pleckstrin homology-like domain, family B, member 1	2.20233	0.471184	4.55694	0.00109359	0.0556973	-0.501812
192129	Vmp1	vacuole membrane protein 1	1.83361	-0.224481	4.01371	0.00254856	0.0556973	-1.25482
192275	Dad1	defender against cell death 1	1.76302	-0.104829	3.99197	0.00263853	0.0556973	-1.28594
245966	Tmem150a	transmembrane protein 150A	2.13616	0.00454252	3.97323	0.00271872	0.0556973	-1.31281
246147	Ctsq	cathepsin Q	2.1795	-0.05033	4.03779	0.00245266	0.0556973	-1.22043
260326	Adgrg1	adhesion G protein-coupled receptor G1	2.1321	-0.587368	4.86402	0.000690432	0.0556973	-0.0983101
266600	Csdc2	cold shock domain containing C2	2.40489	0.0491199	5.57942	0.000249223	0.0556973	0.776857
286908	Pdlim7	PDZ and LIM domain 7	2.21807	0.0400791	4.95019	0.000608316	0.0556973	0.0119308
286910	Smim3	small integral membrane protein 3	2.50268	-0.275673	5.6992	0.000211625	0.0556973	0.914537
287005	Camk2n1	calcium/calmodulin-dependent protein kinase II inhibitor 1	1.9111	-0.0571153	4.39336	0.00140487	0.0556973	-0.723432
287633	Lrrc59	leucine rich repeat containing 59	2.01484	0.292121	3.97259	0.00272152	0.0556973	-1.31373
287642	Slc35b1	solute carrier family 35, member B1	2.07808	0.271537	4.22441	0.0018268	0.0556973	-0.957042
287645	Snf8	SNF8, ESCRT-II complex subunit	1.90228	-0.352878	4.15548	0.00203568	0.0556973	-1.05368
287925	Pkp2	plakophilin 2	2.03138	0.0327725	4.46852	0.00125155	0.0556973	-0.621036
288353	Cggbp1	CGG triplet repeat binding protein 1	1.95397	0.218494	4.23764	0.00178935	0.0556973	-0.938573
288719	Tpst2	tyrosylprotein sulfotransferase 2	2.11184	0.252147	4.83066	0.000725331	0.0556973	-0.141345
289211	Fcgr2b	Fc fragment of IgG receptor IIb	2.49024	0.056528	5.66874	0.000220568	0.0556973	0.87977
289399	Inava	innate immunity activator	2.55846	-0.463978	5.28124	0.000377729	0.0556973	0.423147
289443	Lrrc8c	leucine rich repeat containing 8 VRAC subunit C	1.80998	-0.14359	3.95578	0.00279576	0.0556973	-1.33789
289754	Xbp1	X-box binding protein 1	2.09816	0.246754	4.33264	0.00154323	0.0556973	-0.806846
289801	Upp1	uridine phosphorylase 1	2.10271	-0.167794	4.30741	0.00160488	0.0556973	-0.841679
290214	Cmtm5	CKLF-like MARVEL transmembrane domain containing 5	2.0503	-0.467586	4.62355	0.000988627	0.0556973	-0.412888
290692	Klhl2	kelch-like family member 2	2.088	0.0690692	4.67666	0.000912607	0.0556973	-0.342529
290939	Med10	mediator complex subunit 10	2.24036	-0.304418	4.56512	0.00108008	0.0556973	-0.490847
291085	Serpinb6a	serpin family B member 6A	2.03196	-0.0933	4.68457	0.00090183	0.0556973	-0.332094
291463	Ppic	peptidylprolyl isomerase C	2.00691	0.292986	4.17826	0.001964	0.0556973	-1.02166
291784	Rmc1	regulator of MON1-CCZ1	2.0609	0.0132985	4.61891	0.00099557	0.0556973	-0.419048
292060	Irf8	interferon regulatory factor 8	2.31434	0.0945317	5.0594	0.000518922	0.0556973	0.14975
292199	Kiaa0408L	Kiaa0408-like	1.91411	-0.138432	4.05256	0.00239572	0.0556973	-1.19939
292673	Ercc1	ERCC excision repair 1, endonuclease non-catalytic subunit	2.28304	0.0582881	4.94899	0.00060939	0.0556973	0.0103986
292808	Pepd	peptidase D	1.86822	-0.482104	4.32283	0.00156689	0.0556973	-0.820376
292999	Chsy1	chondroitin sulfate synthase 1	1.9512	0.0461816	4.32752	0.00155554	0.0556973	-0.81391
293524	Bag3	Bcl2-associated athanogene 3	1.8061	-0.78643	4.1735	0.00197876	0.0556973	-1.02835
293676	Ctsw	cathepsin W	1.9672	0.110186	4.1556	0.00203531	0.0556973	-1.05352
293711	Hrasls5	HRAS-like suppressor family, member 5	1.81784	-0.162677	4.23058	0.00180924	0.0556973	-0.948427
293736	Myrf	myelin regulatory factor	2.24755	0.0889719	3.95747	0.00278817	0.0556973	-1.33545
294235	Ier3	immediate early response 3	1.97563	0.175336	4.57892	0.0010577	0.0556973	-0.472379
294281	Slc39a7	solute carrier family 39 member 7	2.2929	0.687927	4.73443	0.000836943	0.0556973	-0.266578
294336	Pcbp3	poly(rC) binding protein 3	2.12893	0.103773	4.39533	0.00140059	0.0556973	-0.720727
294988	Ankrd50	ankyrin repeat domain 50	2.14773	0.0925598	4.47042	0.00124792	0.0556973	-0.618464
295062	Wwtr1	WW domain containing transcription regulator 1	2.33284	0.0747699	4.17713	0.00196748	0.0556973	-1.02324
295264	Mllt11	MLLT11, transcription factor 7 cofactor	1.76203	0.66066	4.0296	0.00248485	0.0556973	-1.23212
295341	Ppm1j	protein phosphatase, Mg2+/Mn2+ dependent, 1J	2.1457	0.445276	4.54822	0.00110818	0.0556973	-0.513504
295443	Papss1	3'-phosphoadenosine 5'-phosphosulfate synthase 1	2.28234	0.13527	4.90594	0.000649098	0.0556973	-0.0445143
295483	RGD1306704	hypothetical LOC295483	1.78252	0.505804	4.13673	0.00209676	0.0556973	-1.0801
295631	Pla2r1	phospholipase A2 receptor 1	1.91244	-0.404366	4.38832	0.00141584	0.0556973	-0.730331
296207	Smim26	small integral membrane protein 26	1.8387	-0.682759	3.96337	0.00276195	0.0556973	-1.32697
296456	Itgav	integrin subunit alpha V	1.96664	0.0975546	4.28267	0.00166789	0.0556973	-0.875953
297337	Rnf181	ring finger protein 181	1.81649	0.152921	4.21645	0.00184971	0.0556973	-0.968153
297480	Foxp1	forkhead box P1	1.96247	-0.457184	3.97989	0.00268995	0.0556973	-1.30326
297961	Ube2j1	ubiquitin-conjugating enzyme E2, J1	1.77023	0.137224	4.06364	0.00235394	0.0556973	-1.18363
298033	Snx30	sorting nexin family member 30	2.07907	0.240952	4.78206	0.000779573	0.0556973	-0.204387
298504	Mfsd2a	major facilitator superfamily domain containing 2A	1.94054	0.656437	4.41629	0.00135608	0.0556973	-0.692088
298544	Sh3bgrl3	SH3 domain binding glutamate-rich protein like 3	2.31276	0.590509	4.98504	0.000578125	0.0556973	0.0561395
299236	Flrt2	fibronectin leucine rich transmembrane protein 2	2.04325	0.421513	4.10575	0.00220196	0.0556973	-1.12388
299356	Syne3	spectrin repeat containing, nuclear envelope family member 3	2.16165	0.37485	4.70355	0.000876525	0.0556973	-0.307107
299488	Esyt2	extended synaptotagmin 2	1.97447	0.661427	4.4484	0.00129077	0.0556973	-0.64835
299510	Zbtb39	zinc finger and BTB domain containing 39	1.97709	-0.0561759	4.09396	0.00224344	0.0556973	-1.14058
299511	Rdh16	retinol dehydrogenase 16	2.15434	-0.127863	4.99253	0.000571852	0.0556973	0.0656069
300691	Nnmt	nicotinamide N-methyltransferase	2.32829	0.0496693	5.14308	0.000459957	0.0556973	0.253909
300901	Plod2	procollagen lysine, 2-oxoglutarate 5-dioxygenase 2	1.7412	0.49887	4.0221	0.0025147	0.0556973	-1.24283
301013	Shisa5	shisa family member 5	2.50701	-0.108798	5.6727	0.000219383	0.0556973	0.884297
301016	Spink8	serine peptidase inhibitor, Kazal type 8	1.95041	0.22474	4.49822	0.00119596	0.0556973	-0.580842
301529	Dnpep	aspartyl aminopeptidase	2.32336	-0.0650173	4.26873	0.00170454	0.0556973	-0.895306
303008	Rhbdf1	rhomboid 5 homolog 1	2.4965	0.272974	5.61392	0.000237705	0.0556973	0.816778
303208	Specc1	sperm antigen with calponin homology and coiled-coil domains 1	2.20293	0.0282331	5.04244	0.000531836	0.0556973	0.128477
303439	Mmd	monocyte to macrophage differentiation-associated	2.45293	0.0370585	5.43281	0.000305279	0.0556973	0.604918
303614	Smurf2	SMAD specific E3 ubiquitin protein ligase 2	2.02159	0.23942	4.56842	0.00107469	0.0556973	-0.486434
303630	Wipi1	WD repeat domain, phosphoinositide interacting 1	2.04991	0.147629	4.42828	0.0013313	0.0556973	-0.675739
303828	Etv5	ets variant 5	1.88363	0.479071	4.16409	0.00200827	0.0556973	-1.04157
303882	Tnk2	tyrosine kinase, non-receptor, 2	2.47702	-0.0681758	4.3583	0.00148306	0.0556973	-0.771514
304581	Tmem119	transmembrane protein 119	2.02377	-0.200026	4.70972	0.000868454	0.0556973	-0.29899
304822	Pkp1	plakophilin 1	2.08774	-0.270881	4.81434	0.00074308	0.0556973	-0.162465
304917	Serpinc1	serpin family C member 1	1.97443	-0.277582	4.15329	0.00204271	0.0556973	-1.05676
304944	Uck2	uridine-cytidine kinase 2	2.27291	-0.0872158	5.11936	0.000475908	0.0556973	0.224507
304983	Tagln2	transgelin 2	1.8941	0.282494	4.05369	0.00239142	0.0556973	-1.19778
305083	Zfp281	zinc finger protein 281	1.86891	0.553777	4.28799	0.00165411	0.0556973	-0.868567
305152	Aff1	AF4/FMR2 family, member 1	1.96047	0.126093	4.33783	0.00153084	0.0556973	-0.799683
305251	Rassf6	Ras association domain family member 6	2.21332	0.0870559	4.27807	0.00167989	0.0556973	-0.882334
305256	Grsf1	G-rich RNA sequence binding factor 1	2.03208	-0.131653	4.64625	0.000955347	0.0556973	-0.382759
305549	Peli1	pellino E3 ubiquitin protein ligase 1	2.21567	-0.369335	4.95226	0.000606475	0.0556973	0.0145651
305624	Pcgf3	polycomb group ring finger 3	1.805	0.289813	4.08859	0.00226261	0.0556973	-1.1482
305897	Nfatc4	nuclear factor of activated T-cells 4	2.06348	-0.137395	4.07136	0.00232528	0.0556973	-1.17266
305922	Lats2	large tumor suppressor kinase 2	2.19712	0.387461	4.83202	0.000723874	0.0556973	-0.13959
306357	Gmip	Gem-interacting protein	2.33094	0.416304	4.97037	0.000590635	0.0556973	0.0375553
307482	Fchsd1	FCH and double SH3 domains 1	2.30224	-0.0181009	4.23677	0.00179179	0.0556973	-0.939786
307582	Lama3	laminin subunit alpha 3	1.98391	-0.166707	4.5498	0.00110552	0.0556973	-0.511386
307644	Kifc3	kinesin family member C3	2.31506	-0.0544364	5.14646	0.000457729	0.0556973	0.258092
308021	Syde2	synapse defective Rho GTPase homolog 2	1.83742	0.513335	4.14574	0.00206718	0.0556973	-1.0674
308509	RGD1308428	similar to RIKEN cDNA 4931406P16	2.29882	0.184343	4.82026	0.000736592	0.0556973	-0.154802
309696	Bcr	BCR, RhoGEF and GTPase activating protein	2.08743	0.242909	4.38036	0.00143334	0.0556973	-0.741237
310710	Sec22b	SEC22 homolog B, vesicle trafficking protein	2.35142	-0.209926	3.95783	0.0027866	0.0556973	-1.33495
310738	Ngf	nerve growth factor	2.03372	0.278482	4.19701	0.00190699	0.0556973	-0.995367
310760	Cttnbp2nl	CTTNBP2 N-terminal like	2.16827	0.725956	4.717	0.000859042	0.0556973	-0.289431
311024	Kif5c	kinesin family member 5C	1.80611	-0.0325081	4.07825	0.0023	0.0556973	-1.16287
311676	Pmepa1	prostate transmembrane protein, androgen induced 1	2.02587	-0.0521657	4.64733	0.000953794	0.0556973	-0.381328
311743	Map3k20	mitogen-activated protein kinase kinase kinase 20	1.99801	0.826252	4.55052	0.00110431	0.0556973	-0.510422
312495	Cyp26b1	cytochrome P450, family 26, subfamily b, polypeptide 1	1.80614	-0.0232718	3.97998	0.00268956	0.0556973	-1.30313
313058	Adgrb2	adhesion G protein-coupled receptor B2	2.26192	0.691155	4.73875	0.00083155	0.0556973	-0.260911
313234	Tbc1d2	TBC1 domain family, member 2	2.02506	0.407612	4.21272	0.00186056	0.0556973	-0.973372
313554	Foxj3	forkhead box J3	1.95695	-0.248926	4.24111	0.00177967	0.0556973	-0.933738
313650	Fam43b	family with sequence similarity 43, member B	2.2588	-0.0318705	4.94546	0.000612542	0.0556973	0.00591364
313729	Errfi1	ERBB receptor feedback inhibitor 1	2.06281	0.388259	4.05792	0.00237541	0.0556973	-1.19176
314553	Ptdss1	phosphatidylserine synthase 1	2.44656	0.325733	4.71821	0.000857484	0.0556973	-0.287839
314694	Chst11	carbohydrate sulfotransferase 11	2.1847	-0.0166539	4.93015	0.00062644	0.0556973	-0.0135938
314800	Acss3	acyl-CoA synthetase short-chain family member 3	2.55097	0.348833	5.70425	0.000210181	0.0556973	0.920285
314862	Dyrk2	dual specificity tyrosine phosphorylation regulated kinase 2	1.82987	0.408366	4.11271	0.00217787	0.0556973	-1.11404
315084	Gsdmd	gasdermin D	2.61123	0.312174	4.74927	0.000818598	0.0556973	-0.247155
315259	Prickle1	prickle planar cell polarity protein 1	1.86106	0.0895516	4.26437	0.00171617	0.0556973	-0.901362
315578	Jhy	junctional cadherin complex regulator	2.18062	0.488226	4.50482	0.00118396	0.0556973	-0.57193
315579	Ubash3b	ubiquitin associated and SH3 domain containing, B	1.78412	-0.154904	4.14017	0.00208543	0.0556973	-1.07526
315617	Sidt2	SID1 transmembrane family, member 2	1.94324	0.356076	4.15249	0.0020453	0.0556973	-1.05789
316348	Pdcl3	phosducin-like 3	1.98905	0.121775	4.46599	0.00125642	0.0556973	-0.624472
316742	Tgif1	TGFB-induced factor homeobox 1	2.26561	-0.316127	4.94666	0.00061147	0.0556973	0.00743724
317396	Ubqln2	ubiquilin 2	1.98517	0.23559	4.11092	0.00218403	0.0556973	-1.11657
360526	P4ha2	prolyl 4-hydroxylase subunit alpha 2	2.37109	0.231451	5.10041	0.000489079	0.0556973	0.200943
360635	Etv4	ets variant 4	2.0177	0.324204	4.41667	0.0013553	0.0556973	-0.691572
360722	Pdia5	protein disulfide isomerase family A, member 5	2.2103	0.240682	5.01903	0.000550214	0.0556973	0.0990511
360899	Sertad4	SERTA domain containing 4	2.19235	0.0288555	5.01168	0.000556127	0.0556973	0.0897873
360950	Wdr1	WD repeat domain 1	2.12801	0.237917	4.48725	0.00121618	0.0556973	-0.59567
361020	Rpp14	ribonuclease P/MRP subunit p14	1.98264	-0.519034	4.40632	0.00137708	0.0556973	-0.705709
361034	Arhgef40	Rho guanine nucleotide exchange factor 40	2.42005	0.0514023	5.46196	0.000293138	0.0556973	0.639408
361313	Rell2	RELT-like 2	2.10712	-0.412192	4.132	0.0021125	0.0556973	-1.08679
361517	Vasp	vasodilator-stimulated phosphoprotein	2.25178	-0.127824	4.13254	0.0021107	0.0556973	-1.08602
361613	Ppme1	protein phosphatase methylesterase 1	1.81645	0.252241	3.97898	0.00269386	0.0556973	-1.30456
361615	Relt	RELT, TNF receptor	1.86513	0.0566161	4.31199	0.0015935	0.0556973	-0.83535
361632	Pik3c2a	phosphatidylinositol-4-phosphate 3-kinase, catalytic subunit type 2 alpha	1.98721	0.252754	4.25305	0.00174675	0.0556973	-0.917099
361695	Tmem134	transmembrane protein 134	2.16269	-0.243105	4.57625	0.00106199	0.0556973	-0.47595
361986	Slc39a1	solute carrier family 39 member 1	2.04739	-0.472542	4.60903	0.00101056	0.0556973	-0.432206
362110	Cdk9	cyclin-dependent kinase 9	1.98101	0.296579	4.14053	0.00208425	0.0556973	-1.07475
362115	Fam129b	family with sequence similarity 129, member B	2.16034	0.408007	4.80281	0.000755905	0.0556973	-0.177422
362138	Rbms1	RNA binding motif, single stranded interacting protein 1	1.85926	0.497132	4.07912	0.00229683	0.0556973	-1.16163
362248	Procr	protein C receptor	2.11589	0.117378	4.02387	0.00250763	0.0556973	-1.2403
362322	Slc25a13	solute carrier family 25 member 13	1.95412	0.342476	4.53137	0.00113696	0.0556973	-0.536144
362460	Golt1b	golgi transport 1B	2.29158	0.198179	4.96078	0.000598968	0.0556973	0.025388
362537	Snapc3	small nuclear RNA activating complex, polypeptide 3	1.88262	0.0162111	3.96127	0.00277129	0.0556973	-1.33
362578	Svbp	small vasohibin binding protein	2.35863	-0.408675	4.32723	0.00155623	0.0556973	-0.814307
362650	Fblim1	filamin binding LIM protein 1	2.2575	-0.287895	4.06383	0.00235322	0.0556973	-1.18335
362721	Eipr1	EARP complex and GARP complex interacting protein 1	2.35199	0.146711	4.31129	0.00159522	0.0556973	-0.836311
362751	Tmx1	thioredoxin-related transmembrane protein 1	2.2238	-0.17876	4.44625	0.00129504	0.0556973	-0.651276
362833	Mob3a	MOB kinase activator 3A	1.88443	0.835968	3.9735	0.00271755	0.0556973	-1.31242
362842	Syde1	synapse defective Rho GTPase homolog 1	1.84579	0.637463	4.10852	0.00219234	0.0556973	-1.11996
362871	Elk3	ELK3, ETS transcription factor	2.31116	0.0410661	5.34023	0.00034755	0.0556973	0.494379
362883	Slc35e3	solute carrier family 35, member E3	2.09452	-0.426987	4.00839	0.00257025	0.0556973	-1.26242
363284	Ube2f	ubiquitin-conjugating enzyme E2F (putative)	1.82691	0.902348	4.19517	0.00191251	0.0556973	-0.997946
363509	Arhgef6	Rac/Cdc42 guanine nucleotide exchange factor 6	2.09816	0.220458	4.84408	0.000711068	0.0556973	-0.124007
363595	Tcf7	transcription factor 7	1.86529	-0.221294	4.31263	0.00159192	0.0556973	-0.834469
363781	Plcxd2	phosphatidylinositol-specific phospholipase C, X domain containing 2	1.92865	0.816264	4.26954	0.00170237	0.0556973	-0.894171
363875	Rac1	Rac family small GTPase 1	1.98977	-0.0489405	3.99671	0.0026186	0.0556973	-1.27914
365252	Zdhhc13	zinc finger, DHHC-type containing 13	1.99113	0.357423	4.09743	0.00223115	0.0556973	-1.13567
365361	Lyrm1	LYR motif containing 1	2.37687	-0.205896	4.21493	0.00185412	0.0556973	-0.970281
366508	Pik3cd	phosphatidylinositol-4,5-bisphosphate 3-kinase, catalytic subunit delta	2.14626	0.25478	4.50039	0.00119199	0.0556973	-0.577902
367743	Praf2	PRA1 domain family, member 2	2.0125	-0.286409	3.98655	0.00266145	0.0556973	-1.2937
378467	Tmem159	transmembrane protein 159	1.92505	-0.0845108	4.17743	0.00196656	0.0556973	-1.02282
408223	Usp54	ubiquitin specific peptidase 54	2.24078	0.197181	4.97849	0.000583677	0.0556973	0.0478441
432393	Kprp	keratinocyte proline-rich protein	2.30187	0.524158	4.47945	0.00123077	0.0556973	-0.606219
494521	Kctd10	potassium channel tetramerization domain containing 10	2.19576	-0.2742	4.64636	0.000955189	0.0556973	-0.382614
498272	Uap1	UDP-N-acetylglucosamine pyrophosphorylase 1	2.0283	0.480142	4.27364	0.00169153	0.0556973	-0.888485
498297	Cnst	consortin, connexin sorting protein	2.2339	-0.0784185	4.27524	0.00168731	0.0556973	-0.886261
498662	Tdrp	testis development related protein	2.16892	-0.158566	4.47152	0.0012458	0.0556973	-0.616962
498764	Jcad	junctional cadherin 5 associated	1.9257	-0.00664946	4.42957	0.00132866	0.0556973	-0.673978
498972	Cpne2	copine 2	2.28207	-0.188864	4.85329	0.000701454	0.0556973	-0.112126
499114	Fbxo27	F-box protein 27	2.35745	0.258678	5.37473	0.00033111	0.0556973	0.53574
499941	Dbndd2	dysbindin domain containing 2	2.03524	0.308786	4.66411	0.000929994	0.0556973	-0.359113
500221	Eva1a	eva-1 homolog A, regulator of programmed cell death	2.13171	0.0536271	4.94555	0.000612459	0.0556973	0.0060315
500511	Ube2u	ubiquitin conjugating enzyme E2 U	2.37139	-0.508507	4.23657	0.00179235	0.0556973	-0.940064
500640	Ccdc71l	coiled-coil domain containing 71-like	2.04224	0.281264	4.52456	0.00114882	0.0556973	-0.54531
501065	Cmtm7	CKLF-like MARVEL transmembrane domain containing 7	1.94588	0.421461	4.09162	0.00225176	0.0556973	-1.14389
501795	Prr36	proline rich 36	1.9639	-0.374338	4.20163	0.00189321	0.0556973	-0.988894
502694	Dok5	docking protein 5	1.96713	0.0160954	4.12335	0.00214152	0.0556973	-1.09899
503165	Arfgap3	ADP-ribosylation factor GTPase activating protein 3	1.99361	0.102617	4.29146	0.00164519	0.0556973	-0.863756
503214	Rbpms2	RNA binding protein, mRNA processing factor 2	2.21649	0.142059	4.56813	0.00107517	0.0556973	-0.486823
679578	Ldlrad4	low density lipoprotein receptor class A domain containing 4	2.06652	-0.343207	4.76991	0.000793796	0.0556973	-0.220211
679834	Meig1	meiosis/spermiogenesis associated 1	2.15634	-0.213377	4.62071	0.000992874	0.0556973	-0.416662
680244	Tmem139	transmembrane protein 139	2.04077	-0.179244	4.10234	0.00221387	0.0556973	-1.12871
680466	Plpp5	phospholipid phosphatase 5	2.04801	0.304858	4.21829	0.00184439	0.0556973	-0.965584
682920	Phactr4	phosphatase and actin regulator 4	2.43943	0.364017	4.89908	0.000655679	0.0556973	-0.0532993
684259	Rusc2	RUN and SH3 domain containing 2	2.05973	0.446341	4.47698	0.00123543	0.0556973	-0.609564
685045	Abracl	ABRA C-terminal like	1.94198	-0.141819	4.34988	0.00150253	0.0556973	-0.783099
685964	LOC685964	hypothetical protein LOC685964	2.28029	0.549767	4.13502	0.00210245	0.0556973	-1.08252
686809	Exoc3l2	exocyst complex component 3-like 2	2.21607	-0.314561	4.23086	0.00180845	0.0556973	-0.948036
687561	Anks4b	ankyrin repeat and sterile alpha motif domain containing 4B	2.21364	0.11994	4.32022	0.00157326	0.0556973	-0.823983
689997	Fam91a1	family with sequence similarity 91, member A1	2.36792	0.167292	4.73319	0.000838496	0.0556973	-0.268202
100360501	Rnh1	ribonuclease/angiogenin inhibitor 1	2.45009	0.0946764	4.18919	0.00193055	0.0556973	-1.00633
100568448	Snhg4	small nucleolar RNA host gene 4 (non-protein coding)	2.14129	0.493826	4.65456	0.000943462	0.0556973	-0.371751
100909946	LOC100909946	uncharacterized LOC100909946	1.90784	-0.30558	4.07814	0.00230041	0.0556973	-1.16303
100911717	LOC100911717	uncharacterized LOC100911717	2.33297	-0.0748412	5.10603	0.000485132	0.0556973	0.207941
102547233	LOC102547233	uncharacterized LOC102547233	1.8803	0.169399	4.3787	0.00143702	0.0556973	-0.743513
108348176	LOC108348176	tubulin beta-2A chain pseudogene	2.32485	-0.0257275	4.71117	0.000866575	0.0556973	-0.29709
108352599	LOC108352599	uncharacterized LOC108352599	2.04904	0.121598	4.67843	0.000910186	0.0556973	-0.340195
54250	Fgf2	fibroblast growth factor 2	2.1001	0.0533949	3.94314	0.00285296	0.0559649	-1.35608
79431	Bhlhe40	basic helix-loop-helix family, member e40	1.769	0.365627	3.94832	0.00282935	0.0559649	-1.34862
298376	Gpx7	glutathione peroxidase 7	2.13259	0.500923	3.94885	0.00282697	0.0559649	-1.34786
313648	Ddost	dolichyl-diphosphooligosaccharide--protein glycosyltransferase non-catalytic subunit	1.81565	0.117231	3.94776	0.0028319	0.0559649	-1.34943
360919	LOC360919	similar to alpha-fetoprotein	1.9993	-0.0091137	3.94446	0.00284693	0.0559649	-1.35418
406864	Clic1	chloride intracellular channel 1	1.86673	0.00667337	3.94378	0.00285001	0.0559649	-1.35515
54133	Pdlim1	PDZ and LIM domain 1	1.78338	0.140212	3.9396	0.00286918	0.0561984	-1.36118
291044	Nedd9	neural precursor cell expressed, developmentally down-regulated 9	1.83516	-0.0917058	3.9339	0.00289553	0.0561984	-1.36939
307649	Ciapin1	cytokine induced apoptosis inhibitor 1	1.90177	0.413036	3.93362	0.00289682	0.0561984	-1.36979
306283	Anxa8	annexin A8	1.85612	0.54005	3.93275	0.00290089	0.0561997	-1.37105
500400	Fam110b	family with sequence similarity 110, member B	1.7549	-0.322115	3.92512	0.00293665	0.0562046	-1.38206
309429	Kank1	KN motif and ankyrin repeat domains 1	2.14386	0.522167	3.92256	0.00294875	0.0562749	-1.38575
29181	Cdh10	cadherin 10	1.69501	-0.294169	3.91869	0.00296712	0.0563359	-1.39133
24373	Fst	follistatin	1.74203	-0.148925	3.89609	0.00307692	0.0567477	-1.424
93646	Sec31a	SEC31 homolog A, COPII coat complex component	1.74686	-0.0848258	3.89806	0.00306717	0.0567477	-1.42115
140898	Arhgef5	Rho guanine nucleotide exchange factor 5	2.06782	0.349392	3.90499	0.00303316	0.0567477	-1.41112
245986	Gng8	G protein subunit gamma 8	1.92214	-0.641002	3.89446	0.00308499	0.0567477	-1.42635
294804	Rai14	retinoic acid induced 14	1.68701	0.487897	3.8979	0.00306796	0.0567477	-1.42138
299626	Gadd45b	growth arrest and DNA-damage-inducible, beta	1.7308	0.266793	3.89763	0.00306929	0.0567477	-1.42177
494345	Pdcd10	programmed cell death 10	2.07753	0.270976	3.90834	0.00301691	0.0567477	-1.40629
684258	Chchd7	coiled-coil-helix-coiled-coil-helix domain containing 7	1.74759	-0.260007	3.89415	0.00308652	0.0567477	-1.4268
306288	Mmrn2	multimerin 2	1.82312	-0.862099	3.89033	0.00310556	0.0568007	-1.43233
498398	Selenom	selenoprotein M	2.24303	0.240812	3.89159	0.00309927	0.0568007	-1.43051
64563	Nphs1	NPHS1 nephrin	2.04057	0.0865478	3.88176	0.00314876	0.0569679	-1.44475
170897	Sphk1	sphingosine kinase 1	1.94398	0.845611	3.87969	0.00315926	0.0569679	-1.44775
287534	Rflnb	refilin B	1.78292	0.194875	3.88382	0.00313831	0.0569679	-1.44177
363232	Bzw1	basic leucine zipper and W2 domains 1	1.8655	-0.186235	3.88423	0.00313623	0.0569679	-1.44117
494344	Ier2	immediate early response 2	1.75245	0.646727	3.87976	0.0031589	0.0569679	-1.44765
300242	Krt7	keratin 7	1.93496	0.0969931	3.87659	0.00317509	0.0571069	-1.45224
29545	Uchl1	ubiquitin C-terminal hydrolase L1	1.85062	-0.316169	3.85686	0.00327774	0.0572126	-1.48087
58834	Dlc1	DLC1 Rho GTPase activating protein	1.65709	0.0386261	3.86191	0.00325116	0.0572126	-1.47354
64537	Hpse	heparanase	1.80773	-0.180496	3.84441	0.00334432	0.0572126	-1.49897
116689	Ptpn6	protein tyrosine phosphatase, non-receptor type 6	1.73069	0.0370534	3.84003	0.00336808	0.0572126	-1.50534
170905	Lfng	LFNG O-fucosylpeptide 3-beta-N-acetylglucosaminyltransferase	1.78627	-0.761114	3.86581	0.00323077	0.0572126	-1.46788
288583	Plod3	procollagen-lysine, 2-oxoglutarate 5-dioxygenase 3	2.08622	0.136587	3.86439	0.00323817	0.0572126	-1.46994
291318	Nmt2	N-myristoyltransferase 2	1.79452	-0.10253	3.84679	0.00333152	0.0572126	-1.49552
292095	Ttc13	tetratricopeptide repeat domain 13	1.93168	-0.0107659	3.84225	0.00335603	0.0572126	-1.50212
292188	Rnf217	ring finger protein 217	1.92612	-0.328986	3.86652	0.00322707	0.0572126	-1.46685
298694	Plekhn1	pleckstrin homology domain containing N1	1.9261	-0.087293	3.84847	0.00332248	0.0572126	-1.49307
307395	Ablim3	actin binding LIM protein family, member 3	2.00234	-0.0170575	3.86945	0.00321185	0.0572126	-1.4626
309255	Mtmr10	myotubularin related protein 10	1.82167	0.654574	3.86808	0.00321893	0.0572126	-1.46458
311059	March7	membrane associated ring-CH-type finger 7	2.23646	0.146687	3.85118	0.00330796	0.0572126	-1.48913
313219	Zfp189	zinc finger protein 189	1.86851	-0.239673	3.85038	0.00331221	0.0572126	-1.49029
498130	Stard13	StAR-related lipid transfer domain containing 13	1.81366	0.463994	3.85302	0.00329814	0.0572126	-1.48646
501095	Rftn1	raftlin lipid raft linker 1	1.77775	-0.535835	3.85656	0.00327935	0.0572126	-1.48132
501841	Coro1c	coronin 1C	1.66957	0.156909	3.8642	0.00323917	0.0572126	-1.47022
302313	Tspan6	tetraspanin 6	2.13371	0.279807	3.83869	0.00337538	0.0572675	-1.50729
29158	Fbln5	fibulin 5	1.77277	0.389887	3.82711	0.00343919	0.0573597	-1.52415
81634	Actn1	actinin, alpha 1	1.64779	0.570341	3.82906	0.00342835	0.0573597	-1.52131
298201	Fam214b	family with sequence similarity 214, member B	1.97617	0.469688	3.82658	0.00344216	0.0573597	-1.52493
301416	Coq10b	coenzyme Q10B	1.68444	0.735605	3.82596	0.00344559	0.0573597	-1.52583
312603	Rybp	RING1 and YY1 binding protein	1.81205	-0.368391	3.82441	0.00345422	0.0573597	-1.52808
314843	Ptprb	protein tyrosine phosphatase, receptor type, B	2.08135	-0.240098	3.82581	0.00344643	0.0573597	-1.52605
25441	Fcer1g	Fc fragment of IgE receptor Ig	2.22185	-0.186943	3.81421	0.00351176	0.0573669	-1.54296
64348	Cryba4	crystallin, beta A4	1.85606	-0.00595942	3.81968	0.00348077	0.0573669	-1.53497
287129	Tmem204	transmembrane protein 204	2.09965	0.130191	3.81589	0.00350221	0.0573669	-1.5405
288025	Hrasls	HRAS-like suppressor	1.81066	-0.35311	3.82258	0.00346448	0.0573669	-1.53075
361029	Ktn1	kinectin 1	1.86442	-0.235232	3.81394	0.00351328	0.0573669	-1.54335
100909928	LOC100909928	uncharacterized LOC100909928	1.93251	-0.363071	3.81764	0.00349233	0.0573669	-1.53796
63938	Hibadh	3-hydroxyisobutyrate dehydrogenase	1.89024	-0.434221	3.79387	0.00362945	0.0578415	-1.57265
287526	Serpinf1	serpin family F member 1	1.90286	-0.197828	3.79532	0.0036209	0.0578415	-1.57053
304429	Psph	phosphoserine phosphatase	1.74361	0.556006	3.79374	0.00363023	0.0578415	-1.57284
259270	Zfp335	zinc finger protein 335	2.07852	0.204282	3.79083	0.0036474	0.0579637	-1.5771
24617	Serpine1	serpin family E member 1	1.66929	0.347505	3.77982	0.00371315	0.058064	-1.5932
83785	Vegfa	vascular endothelial growth factor A	1.78331	0.172984	3.78615	0.00367517	0.058064	-1.58393
288659	Vps37b	VPS37B, ESCRT-I subunit	1.76376	0.0258929	3.77888	0.00371879	0.058064	-1.59456
304645	Tbc1d9	TBC1 domain family member 9	1.80916	-0.163786	3.77671	0.00373195	0.058064	-1.59775
314616	Arid3a	AT-rich interaction domain 3A	1.76095	0.451527	3.77689	0.00373087	0.058064	-1.59749
100362805	Txndc5	thioredoxin domain containing 5	1.78425	0.418843	3.77686	0.00373103	0.058064	-1.59753
259171	Dclre1c	DNA cross-link repair 1C	1.92839	-0.0747014	3.77601	0.00373619	0.0580658	-1.59877
25391	Atp2a3	ATPase sarcoplasmic/endoplasmic reticulum Ca2+ transporting 3	1.93474	-0.0174763	3.75602	0.00385959	0.0581315	-1.62806
117255	Ptpn12	protein tyrosine phosphatase, non-receptor type 12	1.69251	0.236803	3.75508	0.00386547	0.0581315	-1.62944
294806	C1qtnf3	C1q and TNF related 3	1.63526	1.09549	3.75874	0.00384256	0.0581315	-1.62407
301337	Plekhb2	pleckstrin homology domain containing B2	1.72181	0.22723	3.76379	0.00381109	0.0581315	-1.61666
308843	Tsku	tsukushi, small leucine rich proteoglycan	1.65937	-0.917755	3.76068	0.00383045	0.0581315	-1.62123
313582	Fhl3	four and a half LIM domains 3	1.76913	0.411439	3.76977	0.00377425	0.0581315	-1.60791
498834	Myo7b	myosin VIIb	1.70335	-0.0545826	3.75829	0.00384535	0.0581315	-1.62473
500102	Fam131b	family with sequence similarity 131, member B	2.02406	0.462647	3.76175	0.00382379	0.0581315	-1.61966
501569	Tmem47	transmembrane protein 47	1.85582	0.157085	3.76041	0.00383212	0.0581315	-1.62162
689959	LOC689959	hypothetical protein LOC689959	1.75162	-0.271732	3.7546	0.00386851	0.0581315	-1.63014
84379	Rab6a	RAB6A, member RAS oncogene family	2.03567	0.326078	3.74963	0.00389988	0.0581674	-1.63743
294313	Mtch1	mitochondrial carrier 1	1.84051	-0.370012	3.74963	0.00389986	0.0581674	-1.63742
296315	Rab5if	RAB5 interacting factor	1.96403	0.225578	3.74498	0.00392951	0.0583835	-1.64425
681665	Ints6l	integrator complex subunit 6 like	1.77281	0.00174948	3.74475	0.00393097	0.0583835	-1.64459
24417	Grm4	glutamate metabotropic receptor 4	2.14519	-0.168238	3.73103	0.00401978	0.0584706	-1.66474
78967	Mcam	melanoma cell adhesion molecule	1.62734	0.254376	3.73063	0.0040224	0.0584706	-1.66532
81921	Sh3gl3	SH3 domain containing GRB2 like 3, endophilin A3	1.85458	-0.216814	3.7297	0.00402854	0.0584706	-1.6667
83521	Rrad	RRAD, Ras related glycolysis inhibitor and calcium channel regulator	1.67463	-0.159167	3.72798	0.00403981	0.0584706	-1.66922
114107	Kremen1	kringle containing transmembrane protein 1	1.95183	0.186252	3.74155	0.00395153	0.0584706	-1.64929
117140	Hivep1	human immunodeficiency virus type I enhancer binding protein 1	2.34681	-0.10533	3.73718	0.00397974	0.0584706	-1.65571
170922	Ilk	integrin-linked kinase	2.12711	0.170995	3.72989	0.00402728	0.0584706	-1.66642
295342	Rhoc	ras homolog family member C	1.93657	-0.754857	3.73735	0.00397867	0.0584706	-1.65546
300741	Mpi	mannose phosphate isomerase	1.79602	0.28295	3.73251	0.00401012	0.0584706	-1.66257
316580	Sp140	SP140 nuclear body protein	1.98556	0.454896	3.72484	0.00406059	0.0584706	-1.67385
503027	Map4k5	mitogen-activated protein kinase kinase kinase kinase 5	1.8248	-0.197485	3.73375	0.004002	0.0584706	-1.66074
686781	Ppp1r13l	protein phosphatase 1, regulatory subunit 13 like	1.64514	0.584539	3.7309	0.00402067	0.0584706	-1.66493
25484	Myo1e	myosin IE	1.8816	0.453006	3.71214	0.00414555	0.058855	-1.69253
54297	Rgs8	regulator of G-protein signaling 8	1.98989	0.420601	3.71366	0.00413528	0.058855	-1.69029
299617	Abhd17a	abhydrolase domain containing 17A	2.23051	0.0894468	3.71343	0.00413686	0.058855	-1.69063
302980	Fahd1	fumarylacetoacetate hydrolase domain containing 1	1.84066	-0.0847696	3.71543	0.00412337	0.058855	-1.68769
84556	Rims1	regulating synaptic membrane exocytosis 1	1.88788	-0.0273331	3.70807	0.00417315	0.0588762	-1.69851
116663	Dusp6	dual specificity phosphatase 6	1.67183	0.227818	3.70796	0.00417394	0.0588762	-1.69869
300078	Dnal4	dynein, axonemal, light chain 4	2.09525	-0.170273	3.70741	0.00417763	0.0588762	-1.69948
24888	Bcl2l1	Bcl2-like 1	1.88274	0.304283	3.706	0.00418729	0.0588977	-1.70157
314856	Mdm2	MDM2 proto-oncogene	2.13915	-0.236983	3.69835	0.00423992	0.0590207	-1.71284
366960	Maff	MAF bZIP transcription factor F	1.78935	0.686686	3.69832	0.0042401	0.0590207	-1.71288
300455	Bmper	BMP-binding endothelial regulator	2.27169	-0.54062	3.69459	0.00426604	0.0590503	-1.71838
171100	Angptl2	angiopoietin-like 2	1.74724	-0.0462981	3.68565	0.00432883	0.0592278	-1.73157
361295	Ss18	SS18, nBAF chromatin remodeling complex subunit	2.1862	-0.0188494	3.6848	0.00433487	0.0592278	-1.73283
361363	Ccdc102a	coiled-coil domain containing 102A	1.84893	0.289941	3.69026	0.0042963	0.0592278	-1.72476
502776	Scrn1	secernin 1	2.07128	0.280604	3.68468	0.00433569	0.0592278	-1.733
314743	Cdk17	cyclin-dependent kinase 17	1.64068	0.308892	3.68202	0.00435458	0.0592906	-1.73692
56780	Acpp	acid phosphatase, prostate	1.79623	-0.344725	3.68059	0.00436475	0.0593716	-1.73903
307660	Ces5a	carboxylesterase 5A	1.85943	-0.205416	3.67929	0.00437404	0.0594405	-1.74095
311494	Rin2	Ras and Rab interactor 2	1.90507	-0.22296	3.6779	0.00438402	0.0595186	-1.74301
115769	Tjp2	tight junction protein 2	1.63262	0.159632	3.67472	0.00440685	0.0595985	-1.7477
25615	Sdc2	syndecan 2	1.83119	0.523868	3.67226	0.00442464	0.0596634	-1.75133
286900	Selenos	selenoprotein S	1.98759	0.33916	3.66981	0.00444245	0.0597277	-1.75496
305987	Dock5	dedicator of cytokinesis 5	2.01123	0.526996	3.6693	0.00444614	0.0597277	-1.75571
300320	L3mbtl2	L3MBTL2 polycomb repressive complex 1 subunit	1.79258	-0.119706	3.66451	0.00448112	0.0600043	-1.76278
500393	Vxn	vexin	1.76778	0.116434	3.66281	0.00449365	0.0600532	-1.76531
681418	Ndufb10	NADH:ubiquinone oxidoreductase subunit B10	1.7296	-0.339436	3.66249	0.00449599	0.0600532	-1.76578
297518	Arpc4	actin related protein 2/3 complex, subunit 4	1.79583	0.0147488	3.65469	0.00455379	0.0602976	-1.77731
498281	Nectin4	nectin cell adhesion molecule 4	2.00435	0.177882	3.65309	0.00456575	0.0602976	-1.77968
25197	St6gal1	ST6 beta-galactoside alpha-2,6-sialyltransferase 1	1.71018	0.617542	3.64249	0.00464576	0.0608404	-1.79537
50993	Rab10	RAB10, member RAS oncogene family	1.79023	-0.0828981	3.62922	0.00474797	0.0609802	-1.81503
64351	Ykt6	YKT6 v-SNARE homolog	1.97869	-0.0733892	3.6386	0.00467551	0.0609802	-1.80113
81516	Smad7	SMAD family member 7	1.63535	0.115241	3.62817	0.00475615	0.0609802	-1.81658
113910	Prnd	prion like protein doppel	1.66636	0.170943	3.63399	0.00471098	0.0609802	-1.80796
117106	Scarb2	scavenger receptor class B, member 2	1.65528	-0.131409	3.634	0.00471091	0.0609802	-1.80795
295105	Schip1	schwannomin interacting protein 1	1.56969	0.724382	3.63608	0.00469483	0.0609802	-1.80486
299799	Rab21	RAB21, member RAS oncogene family	1.70918	-0.387512	3.62837	0.00475457	0.0609802	-1.81628
306012	Polr3d	RNA polymerase III subunit D	2.03771	0.576295	3.63831	0.00467772	0.0609802	-1.80156
361694	Pitpnm1	phosphatidylinositol transfer protein, membrane-associated 1	1.7711	0.572101	3.6324	0.0047233	0.0609802	-1.81032
682930	Cacna1s	calcium voltage-gated channel subunit alpha1 S	2.01779	-0.141604	3.6325	0.00472252	0.0609802	-1.81017
688736	Kiaa0895l	hypothetical protein LOC688736	1.88819	-0.350896	3.63466	0.00470577	0.0609802	-1.80696
102555688	LOC102555688	probable G-protein coupled receptor 173-like	1.64084	-0.387809	3.63182	0.0047278	0.0609802	-1.81118
117044	Rraga	Ras-related GTP binding A	1.91346	0.201571	3.6252	0.0047794	0.0611062	-1.82099
367242	Rab23	RAB23, member RAS oncogene family	1.56692	0.272377	3.62508	0.00478035	0.0611062	-1.82117
63836	Actn4	actinin alpha 4	1.7611	0.587937	3.62167	0.00480719	0.0611884	-1.82623
25406	Cd44	CD44 molecule (Indian blood group)	1.58396	0.385513	3.61688	0.00484514	0.0613383	-1.83333
84583	Rgs2	regulator of G-protein signaling 2	1.83823	0.318517	3.61128	0.00488996	0.0616284	-1.84165
59107	Ltbp1	latent transforming growth factor beta binding protein 1	1.69836	0.37673	3.60562	0.00493565	0.0620374	-1.85006
29147	Jag2	jagged 2	1.66904	0.112947	3.60466	0.00494337	0.0620791	-1.85147
296468	Birc7	baculoviral IAP repeat-containing 7	1.91847	0.0128452	3.60048	0.00497752	0.0620993	-1.85769
302640	Acot9	acyl-CoA thioesterase 9	1.92055	0.0387987	3.59691	0.00500679	0.0620993	-1.86299
309159	Klc2	kinesin light chain 2	2.07643	0.458767	3.60331	0.00495442	0.0620993	-1.85349
319113	Yrdc	yrdC N(6)-threonylcarbamoyltransferase domain containing	1.7111	0.648684	3.60118	0.00497179	0.0620993	-1.85665
680493	Cd3eap	CD3e molecule associated protein	1.71999	0.87756	3.59879	0.00499132	0.0620993	-1.86019
25740	Gnaz	G protein subunit alpha z	2.18655	-0.550308	3.59553	0.00501815	0.0621853	-1.86504
309131	Slc22a18	solute carrier family 22, member 18	1.69516	-0.604439	3.59389	0.00503171	0.0622984	-1.86748
102551435	Eef1akmt4	EEF1A lysine methyltransferase 4	1.83149	0.210865	3.59306	0.00503861	0.062329	-1.86871
24174	Adra2b	adrenoceptor alpha 2B	2.09261	0.183684	3.58999	0.0050641	0.0624795	-1.87328
308807	Prss23	serine protease 23	1.75002	-0.138662	3.58831	0.00507817	0.0624886	-1.87578
361790	Ppp1r18	protein phosphatase 1, regulatory subunit 18	1.80781	0.355058	3.58724	0.00508712	0.062544	-1.87737
688800	Aldh3b2	aldehyde dehydrogenase 3 family, member B2	1.7517	0.0917546	3.58271	0.00512516	0.0627375	-1.88411
312477	Dok1	docking protein 1	1.95014	-0.00796532	3.58155	0.00513496	0.0627499	-1.88584
688292	Card14	caspase recruitment domain family, member 14	1.6782	-0.517355	3.58072	0.00514194	0.062779	-1.88706
83462	Dynlt1	dynein light chain Tctex-type 1	1.76324	-0.206601	3.57547	0.00518666	0.0631204	-1.89489
103691688	LOC103691688	uncharacterized LOC103691688	1.89926	-0.508874	3.57533	0.00518786	0.0631204	-1.8951
502091	Rnf122	ring finger protein 122	1.62569	-0.497871	3.57214	0.00521518	0.0632886	-1.89985
89819	Bud31	BUD31 homolog	1.97079	-0.254356	3.56428	0.0052831	0.0635495	-1.91155
315121	Cdc42ep1	CDC42 effector protein 1	1.73697	0.659935	3.56506	0.00527633	0.0635495	-1.91039
304655	Zswim4	zinc finger, SWIM-type containing 4	1.89125	0.40334	3.56064	0.00531491	0.0636748	-1.91698
24778	Slc2a1	solute carrier family 2 member 1	1.56524	-0.672008	3.55299	0.00538238	0.0638307	-1.92838
94202	Ptprr	protein tyrosine phosphatase, receptor type, R	1.74053	-0.42141	3.55455	0.00536855	0.0638307	-1.92606
291685	Srp19	signal recognition particle 19	1.99173	0.0259167	3.55708	0.00534617	0.0638307	-1.92228
498060	RGD1562726	similar to Putative protein C21orf62 homolog	1.8892	0.0998887	3.55613	0.00535456	0.0638307	-1.9237
690516	Smurf1	SMAD specific E3 ubiquitin protein ligase 1	1.82931	0.516899	3.55305	0.00538188	0.0638307	-1.9283
81829	Mdh2	malate dehydrogenase 2	1.83556	0.140905	3.55177	0.00539327	0.0638911	-1.93021
313211	Nipsnap3b	nipsnap homolog 3B	1.57483	-0.810583	3.54917	0.0054164	0.0640182	-1.93408
360980	Tns3	tensin 3	1.6686	0.866638	3.5484	0.00542333	0.0640462	-1.93524
290370	Dnajc15	DnaJ heat shock protein family (Hsp40) member C15	1.73339	-0.692535	3.54729	0.00543326	0.0640664	-1.93689
499567	RGD1565641	RGD1565641	1.76927	-0.110653	3.54595	0.00544527	0.0640902	-1.93889
288269	Cfap298	cilia and flagella associated protein 298	1.62304	-0.658414	3.544	0.00546284	0.0642432	-1.9418
361842	Sar1a	secretion associated, Ras related GTPase 1A	1.99481	-0.316003	3.54022	0.00549697	0.0642747	-1.94743
681004	Paxbp1	PAX3 and PAX7 binding protein 1	1.84076	0.120595	3.53601	0.00553537	0.0643196	-1.95373
100911235	Med7	mediator complex subunit 7	2.08562	-0.380688	3.53583	0.00553699	0.0643196	-1.95399
298552	Tmem50a	transmembrane protein 50A	1.80821	-0.213894	3.52841	0.0056053	0.0645689	-1.96509
499779	Swi5	SWI5 homologous recombination repair protein	1.62912	-0.314169	3.52631	0.00562475	0.0646869	-1.96822
498630	Wwc2	WW and C2 domain containing 2	1.6171	0.099424	3.52493	0.00563759	0.0647421	-1.97028
50662	Runx1	runt-related transcription factor 1	1.6149	-0.013453	3.51794	0.00570307	0.0653206	-1.98073
117547	Ncr1	natural cytotoxicity triggering receptor 1	2.15856	0.43518	3.51195	0.00575987	0.0656092	-1.98969
286930	Dlgap4	DLG associated protein 4	1.84698	0.574872	3.51477	0.00573306	0.0656092	-1.98547
313722	Spsb1	splA/ryanodine receptor domain and SOCS box containing 1	1.58161	-0.207717	3.50939	0.00578424	0.0656092	-1.99351
100359977	Cd164l2	CD164 molecule like 2	1.53746	-0.0364441	3.50447	0.00583152	0.0660389	-2.00088
365352	Mical2	microtubule associated monooxygenase, calponin and LIM domain containing 2	1.6248	0.394765	3.50067	0.00586836	0.0660762	-2.00657
295707	Tnks1bp1	tankyrase 1 binding protein 1	1.55752	0.788951	3.49813	0.00589309	0.0660792	-2.01038
81521	Msn	moesin	1.80664	0.227791	3.49551	0.00591867	0.0660808	-2.0143
362040	Ostc	oligosaccharyltransferase complex non-catalytic subunit	1.9245	0.118022	3.49492	0.00592448	0.0660808	-2.01519
362366	Fkbp14	FKBP prolyl isomerase 14	1.60247	0.593284	3.48957	0.0059772	0.0662803	-2.0232
500945	RGD1561795	similar to RIKEN cDNA 1700012B09	2.05673	0.530018	3.48876	0.00598517	0.0662803	-2.02441
691337	Stk38l	serine/threonine kinase 38 like	1.58527	0.864113	3.48737	0.00599892	0.0662803	-2.02649
246172	Nexn	nexilin (F actin binding protein)	1.91385	0.197361	3.48487	0.00602387	0.066348	-2.03024
306071	Lcp1	lymphocyte cytosolic protein 1	1.56454	0.125555	3.48486	0.00602392	0.066348	-2.03025
288783	Ormdl2	ORMDL sphingolipid biosynthesis regulator 2	1.75471	0.253701	3.48222	0.00605041	0.0664836	-2.03422
54315	Ucp2	uncoupling protein 2	1.76087	0.588361	3.47915	0.00608122	0.0665186	-2.03882
685059	Msrb1	methionine sulfoxide reductase B1	2.20401	-0.0351381	3.47908	0.00608197	0.0665186	-2.03893
305935	Mtmr6	myotubularin related protein 6	1.51561	-0.323975	3.47451	0.00612817	0.0666757	-2.04578
24827	Tgfa	transforming growth factor alpha	1.62134	-0.854481	3.47089	0.00616507	0.0669002	-2.05121
362957	Ankrd54	ankyrin repeat domain 54	1.67794	-0.600386	3.46695	0.00620549	0.06693	-2.05712
307811	Slc7a6	solute carrier family 7 member 6	1.62469	0.620293	3.46353	0.00624072	0.0670399	-2.06225
310395	Noct	nocturnin	1.64142	0.17876	3.46237	0.00625276	0.0670399	-2.06399
63845	Tmeff1	transmembrane protein with EGF-like and two follistatin-like domains 1	1.62337	-0.54732	3.4589	0.00628886	0.0671114	-2.0692
79438	Igfals	insulin-like growth factor binding protein, acid labile subunit	2.15105	0.285597	3.4595	0.00628257	0.0671114	-2.0683
102552664	Miat	myocardial infarction associated transcript	1.93829	-0.122048	3.45904	0.00628742	0.0671114	-2.06899
24577	Myc	MYC proto-oncogene, bHLH transcription factor	1.5072	1.00329	3.45719	0.00630677	0.0671497	-2.07178
306582	Agpat5	1-acylglycerol-3-phosphate O-acyltransferase 5	1.50776	-0.539464	3.45622	0.00631685	0.0671553	-2.07322
108351584	LOC108351584	uncharacterized LOC108351584	1.78889	-0.550507	3.45647	0.00631431	0.0671553	-2.07286
64470	Ddb1	damage-specific DNA binding protein 1	1.68659	0.254839	3.45461	0.00633381	0.0672327	-2.07565
81760	Grk1	G protein-coupled receptor kinase 1	1.74765	-0.154895	3.45483	0.00633144	0.0672327	-2.07531
315879	Adamts7	ADAM metallopeptidase with thrombospondin type 1 motif, 7	1.55217	-0.71692	3.45367	0.00634367	0.0672372	-2.07706
691644	Myh2	myosin heavy chain 2	1.80171	1.05666	3.45248	0.00635616	0.0672799	-2.07884
300968	Uba5	ubiquitin-like modifier activating enzyme 5	1.78755	0.340646	3.45151	0.00636642	0.0672963	-2.0803
58965	Ramp1	receptor activity modifying protein 1	1.95062	-0.524147	3.44546	0.0064307	0.0675219	-2.08939
84497	Dgat1	diacylglycerol O-acyltransferase 1	1.70301	0.079571	3.44571	0.00642804	0.0675219	-2.08902
290541	Arhgef3	Rho guanine nucleotide exchange factor 3	1.70144	-0.861735	3.44858	0.0063975	0.0675219	-2.08471
306274	Ercc6	ERCC excision repair 6, chromatin remodeling factor	1.97347	-0.0308392	3.44539	0.0064315	0.0675219	-2.0895
689844	Maml2	mastermind-like transcriptional coactivator 2	1.61732	-0.590759	3.44747	0.00640934	0.0675219	-2.08638
24323	Edn1	endothelin 1	1.59851	0.862782	3.42975	0.00660074	0.0677099	-2.11302
56281	Mrpl37	mitochondrial ribosomal protein L37	1.7344	-0.436997	3.43806	0.00651024	0.0677099	-2.10052
84046	Sox11	SRY box 11	1.49054	0.0373409	3.4336	0.00655862	0.0677099	-2.10722
84407	Cdh11	cadherin 11	1.63339	-0.251491	3.43028	0.00659497	0.0677099	-2.11223
114636	Zyx	zyxin	1.96988	0.382661	3.43294	0.00656581	0.0677099	-2.10821
290994	Lman2	lectin, mannose-binding 2	1.60862	0.317421	3.42486	0.00665467	0.0677099	-2.12038
298941	Lamb1	laminin subunit beta 1	1.60157	0.465474	3.42739	0.00662666	0.0677099	-2.11657
360420	Rdh7	retinol dehydrogenase 7	1.5998	0.0619372	3.43271	0.00656839	0.0677099	-2.10857
100366237	Pfdn4	prefoldin subunit 4	1.79138	-0.0483801	3.42989	0.00659926	0.0677099	-2.11281
81732	Actr3	ARP3 actin related protein 3 homolog	1.85461	0.285094	3.42305	0.00667463	0.0677501	-2.1231
363006	Tarbp2	TARBP2, RISC loading complex RNA binding subunit	2.32328	0.0398277	3.42261	0.00667951	0.0677501	-2.12376
363266	Agfg1	ArfGAP with FG repeats 1	1.89397	0.349703	3.41773	0.00673393	0.0679431	-2.1311
29616	Ptprm	protein tyrosine phosphatase, receptor type, M	1.9159	0.397942	3.41519	0.00676253	0.0680257	-2.13494
79215	Mtpn	myotrophin	1.66676	0.249875	3.41485	0.00676629	0.0680257	-2.13545
293614	Ric8a	RIC8 guanine nucleotide exchange factor A	1.80198	0.160047	3.40895	0.006833	0.0682463	-2.14433
305895	Dcaf11	DDB1 and CUL4 associated factor 11	1.9621	0.236636	3.41012	0.00681981	0.0682463	-2.14258
432392	Fut8	fucosyltransferase 8	1.48872	0.419029	3.40906	0.00683174	0.0682463	-2.14416
60568	Syt11	synaptotagmin 11	1.53428	-0.394804	3.40476	0.00688085	0.0683206	-2.15065
498690	Ctla2a	cytotoxic T lymphocyte-associated protein 2 alpha	1.48323	-0.926986	3.40456	0.00688319	0.0683206	-2.15095
315250	Pdzrn4	PDZ domain containing RING finger 4	1.51509	0.512384	3.39664	0.00697452	0.0688516	-2.16289
314262	Plekhh1	pleckstrin homology, MyTH4 and FERM domain containing H1	1.68546	0.126159	3.39434	0.00700125	0.0689601	-2.16635
312401	Ndnf	neuron-derived neurotrophic factor	1.72893	0.163138	3.39168	0.00703235	0.069023	-2.17037
24246	Camk2d	calcium/calmodulin-dependent protein kinase II delta	2.20865	0.543889	3.3864	0.00709444	0.0695124	-2.17833
312478	Loxl3	lysyl oxidase-like 3	1.89659	-0.0465437	3.38449	0.00711708	0.0695444	-2.18121
361612	P4ha3	prolyl 4-hydroxylase subunit alpha 3	1.50634	0.723295	3.38179	0.00714913	0.0697072	-2.18528
680036	Msrb3	methionine sulfoxide reductase B3	1.97216	0.195808	3.38078	0.00716123	0.0697072	-2.18682
24259	Chgb	chromogranin B	1.52342	0.153616	3.37526	0.00722738	0.0697253	-2.19514
25654	Col11a1	collagen type XI alpha 1 chain	1.60153	0.438926	3.37453	0.00723616	0.0697253	-2.19624
81633	Acta2	actin, alpha 2, smooth muscle, aorta	2.04156	-0.606673	3.37673	0.00720975	0.0697253	-2.19293
266680	St18	ST18, C2H2C-type zinc finger	1.83029	-0.389362	3.37768	0.00719829	0.0697253	-2.19149
280671	Txndc9	thioredoxin domain containing 9	1.68863	-0.0350029	3.3763	0.00721485	0.0697253	-2.19357
288498	Wipi2	WD repeat domain, phosphoinositide interacting 2	1.5919	0.400138	3.37676	0.00720933	0.0697253	-2.19288
296732	Smarcd3	SWI/SNF related, matrix associated, actin dependent regulator of chromatin, subfamily d, member 3	2.25461	-0.458518	3.37592	0.0072195	0.0697253	-2.19415
308790	Mex3b	mex-3 RNA binding family member B	1.53464	-0.587739	3.37812	0.00719308	0.0697253	-2.19083
25578	Ywhaz	tyrosine 3-monooxygenase/tryptophan 5-monooxygenase activation protein, zeta	1.78798	0.665771	3.36998	0.00729127	0.0699534	-2.20311
363886	Cnpy4	canopy FGF signaling regulator 4	1.53906	0.547387	3.36426	0.00736119	0.0703196	-2.21176
293050	Abhd2	abhydrolase domain containing 2	1.76564	0.414023	3.363	0.00737669	0.0703834	-2.21366
307579	Zfp521	zinc finger protein 521	2.12082	-0.127565	3.36142	0.00739613	0.0703834	-2.21605
365395	Clcf1	cardiotrophin-like cytokine factor 1	2.04524	0.310422	3.36178	0.00739179	0.0703834	-2.21551
541589	Kyat3	kynurenine aminotransferase 3	1.48601	-1.03134	3.36187	0.00739066	0.0703834	-2.21538
64373	Rhob	ras homolog family member B	1.50334	0.162464	3.35705	0.0074503	0.070606	-2.22266
24471	Hspb1	heat shock protein family B (small) member 1	1.80337	0.323034	3.35495	0.00747649	0.0707325	-2.22583
298942	Dld	dihydrolipoamide dehydrogenase	1.86831	-0.404314	3.35482	0.00747808	0.0707325	-2.22603
29584	Gjb1	gap junction protein, beta 1	1.66797	0.644538	3.35076	0.00752889	0.0708119	-2.23216
288731	Pgam5	PGAM family member 5, mitochondrial serine/threonine protein phosphatase	2.21615	0.142121	3.35016	0.00753653	0.0708119	-2.23308
303336	Wsb1	WD repeat and SOCS box-containing 1	1.97731	-0.198275	3.35268	0.00750483	0.0708119	-2.22926
316290	Ogfrl1	opioid growth factor receptor-like 1	1.52764	-0.962682	3.34928	0.00754752	0.0708119	-2.2344
24591	Neu1	neuraminidase 1	1.76052	0.059892	3.34095	0.00765326	0.0714287	-2.247
362533	Tle1	TLE family member 1, transcriptional corepressor	1.65251	0.536768	3.34129	0.00764897	0.0714287	-2.24649
58936	Plk3	polo-like kinase 3	1.58974	0.701063	3.3397	0.0076692	0.0714641	-2.24888
300965	Srprb	SRP receptor subunit beta	1.68579	-0.270207	3.33894	0.00767902	0.0714641	-2.25004
313777	Noc2l	NOC2-like nucleolar associated transcriptional repressor	1.85912	-0.126462	3.33674	0.00770721	0.0715684	-2.25336
117264	P2ry6	pyrimidinergic receptor P2Y6	1.81491	-0.359625	3.33363	0.00774738	0.0716995	-2.25807
300470	Thyn1	thymocyte nuclear protein 1	1.68551	-0.728615	3.33315	0.00775364	0.0716995	-2.2588
361420	Taf1c	TATA-box binding protein associated factor, RNA polymerase 1 subunit C	1.8071	0.284076	3.33349	0.00774927	0.0716995	-2.25829
361577	Kdelr1	KDEL endoplasmic reticulum protein retention receptor 1	1.77617	-0.636475	3.33349	0.00774924	0.0716995	-2.25829
498188	RGD1562310	similar to hypothetical protein FLJ21415	1.68125	-0.537358	3.33201	0.00776838	0.071725	-2.26053
60584	Lif	LIF, interleukin 6 family cytokine	2.12617	0.412059	3.32621	0.00784413	0.0719764	-2.26931
303298	Rap1gap2	RAP1 GTPase activating protein 2	1.80355	0.37208	3.32809	0.00781941	0.0719764	-2.26646
680747	Mrpl20	mitochondrial ribosomal protein L20	1.91175	-0.455859	3.32614	0.00784499	0.0719764	-2.26941
83467	Slit3	slit guidance ligand 3	1.59193	-0.0878299	3.32339	0.00788108	0.071994	-2.27357
116592	Tff2	trefoil factor 2	1.66834	-0.312725	3.32515	0.00785803	0.071994	-2.27092
291610	Spry4	sprouty RTK signaling antagonist 4	1.46776	0.835128	3.32357	0.00787883	0.071994	-2.27331
308478	Spred3	sprouty-related, EVH1 domain containing 3	1.89765	0.275272	3.3248	0.00786255	0.071994	-2.27144
300756	Arih1	ariadne RBR E3 ubiquitin protein ligase 1	1.8698	-0.0485787	3.31917	0.00793701	0.0723018	-2.27998
290796	Saraf	store-operated calcium entry-associated regulatory factor	1.61289	0.56104	3.31126	0.00804266	0.0729806	-2.29196
311862	Lamc3	laminin subunit gamma 3	1.66986	-0.402349	3.31065	0.00805089	0.0730083	-2.29288
500666	Dact1	dishevelled-binding antagonist of beta-catenin 1	1.4819	0.0600581	3.30977	0.00806273	0.0730685	-2.29422
50622	Slc23a2	solute carrier family 23 member 2	1.75537	-0.317666	3.30299	0.00815469	0.0734758	-2.30449
305012	Kif26b	kinesin family member 26B	1.69929	-0.646291	3.30105	0.00818126	0.073668	-2.30744
678766	Rhou	ras homolog family member U	1.71978	0.365892	3.29511	0.00826297	0.0740718	-2.31644
315338	Hoxc10	homeo box C10	1.68143	-0.552085	3.2942	0.00827562	0.0740801	-2.31783
294744	Gpx8	glutathione peroxidase 8	1.85499	0.163601	3.29137	0.00831488	0.074132	-2.32211
303241	Chd3	chromodomain helicase DNA binding protein 3	1.89247	-0.196595	3.29281	0.00829487	0.074132	-2.31993
361655	Tial1	Tia1 cytotoxic granule-associated RNA binding protein-like 1	1.55258	0.363303	3.29121	0.00831712	0.074132	-2.32236
116477	Wnk1	WNK lysine deficient protein kinase 1	1.47802	0.517397	3.28493	0.00840499	0.0741632	-2.33188
291597	Trim36	tripartite motif-containing 36	1.54241	0.461397	3.28521	0.00840107	0.0741632	-2.33146
303068	Adam19	ADAM metallopeptidase domain 19	1.51019	0.264097	3.28718	0.00837349	0.0741632	-2.32848
24852	Tpm4	tropomyosin 4	1.6045	0.524741	3.2838	0.00842104	0.0741653	-2.33361
60431	Vapb	VAMP associated protein B and C	1.75682	-0.0042333	3.28115	0.00845843	0.0742157	-2.33762
691538	Rnpc3	RNA-binding region (RNP1, RRM) containing 3	1.76559	0.0146289	3.27589	0.00853334	0.0745938	-2.34561
24680	Prkca	protein kinase C, alpha	1.55646	0.972348	3.27269	0.0085792	0.0748097	-2.35046
114120	Gng12	G protein subunit gamma 12	1.77556	0.360308	3.27318	0.00857212	0.0748097	-2.34972
25277	Mfge8	milk fat globule-EGF factor 8 protein	1.98348	0.40204	3.26997	0.00861836	0.0749329	-2.35459
295596	Orc4	origin recognition complex, subunit 4	1.60607	-0.296091	3.26838	0.00864139	0.0749329	-2.35701
309014	Plpp4	phospholipid phosphatase 4	1.61567	-0.100086	3.26873	0.00863635	0.0749329	-2.35648
498100	Mb21d2	Mab-21 domain containing 2	1.52308	0.909632	3.26524	0.00868704	0.0751434	-2.36178
303660	Btbd17	BTB domain containing 17	1.90828	-0.0149855	3.26288	0.00872148	0.0752963	-2.36537
302965	Tnfrsf12a	TNF receptor superfamily member 12A	1.45642	0.662764	3.26047	0.00875684	0.0754104	-2.36903
361992	Them4	thioesterase superfamily member 4	1.43844	0.0891753	3.26062	0.00875461	0.0754104	-2.3688
80881	Serp1	stress-associated endoplasmic reticulum protein 1	1.53171	0.800772	3.25356	0.00885888	0.0754205	-2.37953
290659	Cope	coatomer protein complex, subunit epsilon	1.88642	-0.436205	3.25604	0.00882203	0.0754205	-2.37575
308703	Lrrk1	leucine-rich repeat kinase 1	1.60574	-0.486274	3.25911	0.00877672	0.0754205	-2.37109
361945	Postn	periostin	1.63753	-0.12698	3.25771	0.00879741	0.0754205	-2.37322
100912617	LOC100912617	uncharacterized LOC100912617	1.73839	-0.0579401	3.25648	0.00881563	0.0754205	-2.3751
102554200	LOC102554200	zinc finger protein 53-like	1.697	0.155088	3.25377	0.00885579	0.0754205	-2.37921
170821	Atxn10	ataxin 10	1.60369	-0.668955	3.25081	0.00889986	0.0754985	-2.38371
287675	Krt24	keratin 24	1.49582	-0.175992	3.24832	0.00893711	0.0757232	-2.3875
24424	Gstm2	glutathione S-transferase mu 2	2.17826	-0.438963	3.24539	0.00898116	0.0759591	-2.39195
64465	Cdc42	cell division cycle 42	1.87275	0.209208	3.2457	0.00897647	0.0759591	-2.39148
292305	Sft2d1	SFT2 domain containing 1	1.50569	-0.162467	3.24245	0.00902555	0.0761971	-2.39642
100911353	LOC100911353	uncharacterized LOC100911353	1.90586	-0.107763	3.23975	0.00906657	0.0763759	-2.40053
287701	Krt14	keratin 14	2.02555	0.220295	3.23773	0.00909746	0.0765285	-2.40361
313713	Casz1	castor zinc finger 1	1.60524	0.472167	3.23572	0.00912816	0.0766493	-2.40666
85431	Nox4	NADPH oxidase 4	1.44822	-0.825276	3.23517	0.00913657	0.0766741	-2.40749
29495	Dlg4	discs large MAGUK scaffold protein 4	1.82608	0.0374389	3.23415	0.00915228	0.0767602	-2.40905
363630	Kdm6b	lysine demethylase 6B	1.48922	-0.017464	3.23322	0.00916658	0.0768343	-2.41046
362924	St3gal1	ST3 beta-galactoside alpha-2,3-sialyltransferase 1	1.75635	-0.312481	3.2143	0.00946267	0.0784853	-2.43927
171104	Gper1	G protein-coupled estrogen receptor 1	1.93827	0.0951115	3.20915	0.00954482	0.0786644	-2.4471
296313	Myl9	myosin light chain 9	1.63954	0.177078	3.20522	0.00960819	0.0789365	-2.4531
100361138	Dgkq	diacylglycerol kinase, theta	1.72453	0.065091	3.20075	0.00968056	0.0793033	-2.45989
294299	Tead3	TEA domain transcription factor 3	1.53732	0.730376	3.19723	0.00973816	0.0796321	-2.46527
85250	Col5a2	collagen type V alpha 2 chain	1.76775	0.203118	3.1927	0.00981266	0.0799379	-2.47217
306487	Mtus1	microtubule associated scaffold protein 1	1.61097	-0.221973	3.19113	0.0098386	0.0800243	-2.47457
310801	Slc30a7	solute carrier family 30 member 7	1.80287	-0.203308	3.1908	0.00984403	0.0800243	-2.47507
361886	Adamts6	ADAM metallopeptidase with thrombospondin type 1 motif, 6	1.80828	-0.606582	3.19052	0.00984871	0.0800243	-2.4755
301242	Ptk7	protein tyrosine kinase 7	1.74981	-0.141206	3.18952	0.0098652	0.080112	-2.47701
681021	Paqr6	progestin and adipoQ receptor family member 6	1.99138	0.385474	3.18715	0.00990472	0.0802791	-2.48063
289562	Noa1	nitric oxide associated 1	1.8842	0.0692602	3.18572	0.00992847	0.0803475	-2.4828
24377	G6pd	glucose-6-phosphate dehydrogenase	1.99528	0.00972916	3.18418	0.00995425	0.0803711	-2.48515
81744	Pde7a	phosphodiesterase 7A	1.50338	0.0243468	3.18432	0.00995188	0.0803711	-2.48494
291005	Gadd45g	growth arrest and DNA-damage-inducible, gamma	1.47194	0.312679	3.18033	0.010019	0.0807085	-2.49103
366492	Epha2	Eph receptor A2	1.46233	0.716296	3.17695	0.0100762	0.0810769	-2.49619
89788	Gna15	G protein subunit alpha 15	1.62736	-0.0956311	3.17462	0.0101158	0.0813489	-2.49974
689529	Agfg1-ps1	ArfGAP with FG repeats 1, pseudogene 1	1.70596	0.652658	3.1722	0.0101572	0.081588	-2.50344
304913	Tnn	tenascin N	1.57241	0.228793	3.17081	0.010181	0.0816857	-2.50556
683630	Mat2b	methionine adenosyltransferase 2B	1.54666	0.449329	3.16749	0.010238	0.0819101	-2.51062
29548	Homer3	homer scaffold protein 3	1.69258	-0.281522	3.16249	0.0103245	0.0824145	-2.51824
29382	Ctbp1	C-terminal binding protein 1	1.67451	-0.383618	3.16145	0.0103426	0.0824555	-2.51983
365216	Cadm4	cell adhesion molecule 4	1.53752	-0.0362512	3.16157	0.0103406	0.0824555	-2.51965
29596	Ifrd1	interferon-related developmental regulator 1	1.61293	0.746886	3.15692	0.0104219	0.0828158	-2.52675
84492	Tec	tec protein tyrosine kinase	1.81079	-0.0925338	3.15717	0.0104176	0.0828158	-2.52637
302495	Rap2c	RAP2C, member of RAS oncogene family	1.65852	-0.0464021	3.1536	0.0104804	0.0829527	-2.53182
64353	Pdlim5	PDZ and LIM domain 5	1.47011	0.402238	3.1519	0.0105104	0.0830615	-2.53441
361191	Nsun2	NOP2/Sun RNA methyltransferase family, member 2	2.26862	0.0634392	3.14448	0.0106427	0.0836707	-2.54574
362191	Dph6	diphthamine biosynthesis 6	1.46804	0.485184	3.14481	0.0106369	0.0836707	-2.54524
24498	Il6	interleukin 6	1.46275	0.0680446	3.14158	0.010695	0.08387	-2.55018
94170	Atp6v0e1	ATPase H+ transporting V0 subunit e1	1.91964	0.62732	3.13924	0.0107372	0.0839549	-2.55375
116657	Cplx2	complexin 2	1.38078	0.495947	3.13564	0.0108026	0.0843634	-2.55925
192177	Unc13d	unc-13 homolog D	1.72645	-0.482246	3.13592	0.0107975	0.0843634	-2.55882
362648	Arhgef19	Rho guanine nucleotide exchange factor 19	1.51776	-0.632743	3.13456	0.0108223	0.0843771	-2.5609
681287	Map7d1	MAP7 domain containing 1	1.43477	0.607284	3.13374	0.0108373	0.0844032	-2.56215
362973	Parvb	parvin, beta	1.77531	-0.333893	3.1332	0.0108471	0.0844299	-2.56297
499171	Klf13	Kruppel-like factor 13	1.3905	0.338744	3.13135	0.010881	0.0844599	-2.5658
288993	Slc35f5	solute carrier family 35, member F5	1.36655	0.107481	3.12948	0.0109154	0.0846798	-2.56865
81515	Lyn	LYN proto-oncogene, Src family tyrosine kinase	1.53277	0.275861	3.12612	0.0109774	0.0849271	-2.57379
498328	Pkd2	polycystin 2, transient receptor potential cation channel	1.42528	-0.463698	3.12631	0.010974	0.0849271	-2.57351
64322	Dap	death-associated protein	1.73989	-0.73613	3.12548	0.0109893	0.0849584	-2.57477
298543	Crybg2	crystallin beta-gamma domain containing 2	1.90207	-0.118321	3.12525	0.0109935	0.0849584	-2.57512
25314	Emp1	epithelial membrane protein 1	1.42624	0.369302	3.12416	0.0110138	0.0850047	-2.57679
114764	Mapre1	microtubule-associated protein, RP/EB family, member 1	1.495	0.288927	3.12103	0.0110722	0.0850047	-2.58158
170843	Khdrbs2	KH RNA binding domain containing, signal transduction associated 2	1.37964	-0.897596	3.12084	0.0110756	0.0850047	-2.58186
266711	Lzts1	leucine zipper tumor suppressor 1	1.51334	-0.763575	3.12236	0.0110472	0.0850047	-2.57953
501736	Cd300a	Cd300a molecule	1.81765	-0.108671	3.12125	0.0110681	0.0850047	-2.58124
29546	Homer1	homer scaffold protein 1	1.50966	0.168662	3.11774	0.0111339	0.0852929	-2.58661
24785	Slc9a4	solute carrier family 9 member A4	1.40395	-0.755615	3.1136	0.0112118	0.0853784	-2.59293
292732	Numbl	NUMB-like, endocytic adaptor protein	1.80934	-0.322403	3.11561	0.011174	0.0853784	-2.58986
316317	Imp4	IMP4, U3 small nucleolar ribonucleoprotein	1.54762	-0.334984	3.11493	0.0111868	0.0853784	-2.5909
361207	Tmed9	transmembrane p24 trafficking protein 9	1.37577	0.866148	3.11609	0.0111648	0.0853784	-2.58912
690416	Rbbp8nl	RBBP8 N-terminal like	1.69685	-0.0951803	3.11291	0.0112249	0.0853968	-2.59398
25540	Sbp	spermine binding protein	1.43262	0.314038	3.11138	0.0112539	0.0855603	-2.59632
116717	Trip10	thyroid hormone receptor interactor 10	2.25321	0.0303794	3.10873	0.0113043	0.0857756	-2.60037
192154	Hip1	huntingtin interacting protein 1	1.56484	0.170301	3.10646	0.0113478	0.0858565	-2.60385
500300	Depp1	DEPP1, autophagy regulator	1.889	0.760231	3.10669	0.0113434	0.0858565	-2.60349
295051	Alg5	ALG5, dolichyl-phosphate beta-glucosyltransferase	1.51033	-1.01287	3.10195	0.0114345	0.0860954	-2.61074
25723	Hcrt	hypocretin neuropeptide precursor	1.70926	0.0132405	3.10089	0.011455	0.0861992	-2.61236
171143	Trpm4	transient receptor potential cation channel, subfamily M, member 4	1.62243	-0.13937	3.09966	0.0114789	0.0861992	-2.61425
303596	March10	membrane associated ring-CH-type finger 10	1.50471	0.85842	3.09995	0.0114732	0.0861992	-2.6138
681361	Pisd	phosphatidylserine decarboxylase	2.11367	0.22683	3.09997	0.0114728	0.0861992	-2.61377
362524	Ptpn3	protein tyrosine phosphatase, non-receptor type 3	1.355	-0.568539	3.09787	0.0115136	0.0862757	-2.61699
362724	Sh3yl1	SH3 and SYLF domain containing 1	1.58791	-0.435164	3.09733	0.0115241	0.086308	-2.61781
25367	Adarb1	adenosine deaminase, RNA-specific, B1	1.36624	0.867254	3.09535	0.0115627	0.086367	-2.62084
361160	Leprotl1	leptin receptor overlapping transcript-like 1	1.46038	-0.224246	3.09269	0.0116149	0.0865728	-2.62492
304290	Kdelr2	KDEL endoplasmic reticulum protein retention receptor 2	1.88469	-0.177165	3.09236	0.0116213	0.0865753	-2.62542
362781	Hhipl1	HHIP-like 1	1.62535	0.06119	3.09186	0.0116312	0.0866029	-2.62619
497942	Cxcl16	C-X-C motif chemokine ligand 16	1.36318	-0.824369	3.08743	0.0117186	0.0869773	-2.63297
302499	C1galt1c1	C1GALT1-specific chaperone 1	1.52706	-0.0432156	3.08517	0.0117633	0.0871712	-2.63642
54234	Cacna1e	calcium voltage-gated channel subunit alpha1 E	1.58728	-0.404134	3.08121	0.0118424	0.0874595	-2.64248
83503	Polr2f	RNA polymerase II subunit F	1.3595	0.566079	3.08128	0.011841	0.0874595	-2.64238
266713	Mnat1	MNAT1, CDK activating kinase assembly factor	1.51415	-0.986897	3.08201	0.0118263	0.0874595	-2.64126
314941	Lrp12	LDL receptor related protein 12	1.41813	-0.550179	3.08196	0.0118273	0.0874595	-2.64133
246232	Uxs1	UDP-glucuronate decarboxylase 1	1.71802	0.211111	3.07752	0.0119164	0.0877508	-2.64813
680594	Dph3	diphthamide biosynthesis 3	1.38846	1.07531	3.07812	0.0119043	0.0877508	-2.64721
54400	Bet1l	Bet1 golgi vesicular membrane trafficking protein-like	1.90706	0.195835	3.07525	0.0119622	0.0878525	-2.6516
316916	Clptm1l	CLPTM1-like	1.58642	-0.75672	3.07527	0.0119619	0.0878525	-2.65158
170739	Kcnh7	potassium voltage-gated channel subfamily H member 7	1.36741	-0.300289	3.07275	0.0120129	0.0879875	-2.65543
690229	Wdr74	WD repeat domain 74	1.91338	-0.468805	3.07107	0.012047	0.0880975	-2.658
298186	Ttc39b	tetratricopeptide repeat domain 39B	1.55016	0.286838	3.06936	0.012082	0.0882311	-2.66062
299012	Arhgap5	Rho GTPase activating protein 5	1.39645	0.442536	3.06653	0.01214	0.0884708	-2.66496
81005	Nptxr	neuronal pentraxin receptor	1.56671	0.246073	3.0652	0.0121673	0.0885324	-2.667
102549282	LOC102549282	uncharacterized LOC102549282	1.73092	0.214689	3.06454	0.0121809	0.0885519	-2.66801
361315	Yipf5	Yip1 domain family, member 5	1.79917	0.232444	3.06312	0.01221	0.0886597	-2.67017
366474	Col16a1	collagen type XVI alpha 1 chain	1.37726	0.882458	3.06318	0.0122089	0.0886597	-2.67009
114500	Gbx2	gastrulation brain homeobox 2	1.60858	0.0320151	3.06132	0.0122473	0.0887884	-2.67293
299636	Tle2	TLE family member 2, transcriptional corepressor	1.69235	-0.116632	3.06074	0.0122593	0.0887884	-2.67382
363145	Gmppb	GDP-mannose pyrophosphorylase B	2.01533	0.519425	3.06104	0.0122532	0.0887884	-2.67337
300674	Arcn1	archain 1	1.96342	0.0960657	3.05951	0.012285	0.0888259	-2.67571
317368	Porcn	porcupine O-acyltransferase	1.84215	0.139313	3.05752	0.0123262	0.0888279	-2.67875
365872	Aph1a	aph-1 homolog A, gamma secretase subunit	1.95346	0.0105611	3.05744	0.0123279	0.0888279	-2.67887
290905	Col4a1	collagen type IV alpha 1 chain	1.68774	-0.109981	3.05612	0.0123556	0.0889682	-2.6809
25730	Ntf4	neurotrophin 4	1.50527	-0.460325	3.05524	0.0123739	0.0890073	-2.68224
300036	Tsta3	tissue specific transplantation antigen P35B	1.43249	-0.430742	3.05504	0.0123781	0.0890073	-2.68255
64160	Basp1	brain abundant, membrane attached signal protein 1	1.36836	0.418957	3.04832	0.0125197	0.0894847	-2.69285
79249	Abi1	abl-interactor 1	1.35628	-0.0438881	3.04779	0.0125309	0.0894847	-2.69366
310674	Plekho1	pleckstrin homology domain containing O1	1.5625	-0.357067	3.04766	0.0125336	0.0894847	-2.69385
102554253	LOC102554253	uncharacterized LOC102554253	1.713	-0.28661	3.04453	0.0126002	0.0897406	-2.69865
317486	RGD1565844	similar to RIKEN cDNA 1700045I19	1.58619	-0.441537	3.04268	0.0126397	0.0898321	-2.70149
191575	Nme1	NME/NM23 nucleoside diphosphate kinase 1	1.7109	-0.521569	3.04046	0.0126873	0.0899643	-2.70489
688778	LOC688778	similar to fatty aldehyde dehydrogenase-like	1.53799	0.0585173	3.04032	0.0126903	0.0899643	-2.7051
50554	Smad4	SMAD family member 4	1.63048	-0.0724185	3.03734	0.0127544	0.0902383	-2.70966
116680	Ptpru	protein tyrosine phosphatase, receptor type, U	1.39019	0.187694	3.03733	0.0127546	0.0902383	-2.70968
361985	LOC361985	similar to NICE-3	1.4353	-0.69209	3.03436	0.012819	0.0903306	-2.71424
501099	Srf	serum response factor	1.6583	0.668609	3.03071	0.0128985	0.0905062	-2.71983
171548	Dkk3	dickkopf WNT signaling pathway inhibitor 3	1.81176	0.00198763	3.02603	0.013001	0.0909293	-2.727
25663	Il1r1	interleukin 1 receptor type 1	1.44821	0.429905	3.02224	0.0130848	0.0913743	-2.73281
286888	Wfdc2	WAP four-disulfide core domain 2	1.57048	-0.580258	3.01773	0.0131851	0.0913743	-2.73973
299507	Asnsd1	asparagine synthetase domain containing 1	1.65885	-0.910707	3.0217	0.0130968	0.0913743	-2.73365
360820	Pxn	paxillin	1.61523	-0.857131	3.0215	0.0131013	0.0913743	-2.73395
100360302	Sec16a	SEC16 homolog A, endoplasmic reticulum export factor	1.73045	-0.166748	3.01871	0.0131632	0.0913743	-2.73822
266714	Myo7a	myosin VIIA	1.5521	-0.442685	3.01593	0.0132254	0.0914331	-2.74249
108348384	LOC108348384	uncharacterized LOC108348384	1.85402	-0.137085	3.01578	0.0132286	0.0914331	-2.74271
287443	Acap1	ArfGAP with coiled-coil, ankyrin repeat and PH domains 1	1.74855	0.0415444	3.01386	0.0132717	0.0915483	-2.74566
499073	Brsk1	BR serine/threonine kinase 1	1.57593	-0.166472	3.01342	0.0132817	0.0915723	-2.74634
293508	Prkacb	protein kinase cAMP-activated catalytic subunit beta	1.54893	-0.412673	3.01106	0.013335	0.0916908	-2.74996
29154	Capn2	calpain 2	1.89403	-0.088702	3.01001	0.0133586	0.0916975	-2.75156
81650	Csnk2b	casein kinase 2 beta	1.44925	-0.378186	3.00876	0.0133869	0.0917563	-2.75348
25181	Bgn	biglycan	1.56834	-0.329457	3.00786	0.0134075	0.0917645	-2.75487
407764	St6galnac4	ST6 N-acetylgalactosaminide alpha-2,6-sialyltransferase 4	1.44903	0.393176	3.00434	0.0134876	0.0920973	-2.76026
116543	Ebf1	EBF transcription factor 1	1.48821	-0.0406996	3.00165	0.0135491	0.0923754	-2.76438
29499	Shh	sonic hedgehog signaling molecule	1.51312	-0.373445	3.00078	0.0135693	0.0924023	-2.76572
100196907	Tmem59	transmembrane protein 59	1.89507	0.128886	3.00062	0.0135729	0.0924023	-2.76597
499672	Cdc42se1	CDC42 small effector 1	1.89398	0.500225	2.99893	0.0136119	0.0925335	-2.76856
690898	Sh3bp5l	SH3 binding domain protein 5 like	1.52003	0.1697	2.99781	0.0136376	0.0926105	-2.77027
140590	Bmpr2	bone morphogenetic protein receptor type 2	1.36552	0.526616	2.99626	0.0136736	0.0927288	-2.77266
313496	Ccdc107	coiled-coil domain containing 107	1.40687	0.881382	2.99561	0.0136886	0.0927771	-2.77365
362113	Ptrh1	peptidyl-tRNA hydrolase 1 homolog	1.69044	0.681963	2.99023	0.013814	0.0931865	-2.7819
25253	Dpp4	dipeptidylpeptidase 4	1.66122	0.150945	2.98502	0.0139366	0.0934632	-2.7899
293860	Flna	filamin A	1.73293	0.133177	2.98691	0.013892	0.0934632	-2.78699
296733	Chpf2	chondroitin polymerizing factor 2	1.65857	-0.514264	2.98755	0.0138771	0.0934632	-2.78602
303214	Trim16	tripartite motif-containing 16	1.36563	-0.794515	2.98517	0.0139331	0.0934632	-2.78967
361436	Afg3l1	AFG3(ATPase family gene 3)-like 1 (S. cerevisiae)	1.6958	-0.409603	2.98668	0.0138974	0.0934632	-2.78735
362861	Slc41a2	solute carrier family 41 member 2	1.47559	0.0337589	2.98608	0.0139115	0.0934632	-2.78826
365466	Cpn1	carboxypeptidase N subunit 1	1.76305	0.7719	2.98717	0.0138859	0.0934632	-2.7866
500575	Szrd1	SUZ RNA binding domain containing 1	1.40825	0.228452	2.98554	0.0139244	0.0934632	-2.7891
116645	Plaa	phospholipase A2, activating protein	1.43975	0.686631	2.98338	0.0139755	0.0935495	-2.79242
79129	Cyba	cytochrome b-245 alpha chain	1.32585	-0.894499	2.98168	0.0140157	0.0936931	-2.79501
65039	Lcn1	lipocalin 1	2.16084	0.155695	2.98134	0.0140238	0.0937027	-2.79554
24398	Gls	glutaminase	1.58039	0.815803	2.98007	0.014054	0.0937975	-2.79749
360804	Cdk2ap1	cyclin-dependent kinase 2 associated protein 1	1.58413	-0.0311852	2.97976	0.0140614	0.0937975	-2.79796
361877	Ssbp2	single-stranded DNA binding protein 2	1.63453	-0.818534	2.97963	0.0140646	0.0937975	-2.79817
503052	Vash1	vasohibin 1	1.60382	-0.0510134	2.98025	0.0140498	0.0937975	-2.79721
303332	Tmem199	transmembrane protein 199	1.56505	0.122889	2.97902	0.0140792	0.0938503	-2.79911
83788	Sept9	septin 9	1.45538	-0.118171	2.97711	0.0141249	0.0940654	-2.80204
305913	Zmym2	zinc finger MYM-type containing 2	1.41703	-0.511735	2.97604	0.0141505	0.094072	-2.80368
108351758	LOC108351758	uncharacterized LOC108351758	1.60824	-0.331448	2.97611	0.0141487	0.094072	-2.80356
25612	Asns	asparagine synthetase (glutamine-hydrolyzing)	1.95569	-0.353171	2.97162	0.0142569	0.0944302	-2.81046
66015	Adamts4	ADAM metallopeptidase with thrombospondin type 1 motif, 4	1.64071	-0.325519	2.96891	0.0143227	0.0944302	-2.81462
84574	Tgfb1i1	transforming growth factor beta 1 induced transcript 1	1.75004	-0.0828482	2.96841	0.0143348	0.0944302	-2.81538
192263	Pigl	phosphatidylinositol glycan anchor biosynthesis, class L	1.42685	-0.379376	2.96848	0.014333	0.0944302	-2.81527
295235	Ssr2	signal sequence receptor subunit 2	1.71618	-0.674474	2.97047	0.0142847	0.0944302	-2.81222
297994	Bag1	Bcl2 associated athanogene 1	1.3517	-1.04087	2.96928	0.0143137	0.0944302	-2.81405
309361	Chuk	conserved helix-loop-helix ubiquitous kinase	1.60887	0.674749	2.96732	0.0143613	0.0944302	-2.81705
362994	Ccdc65	coiled-coil domain containing 65	1.76517	-0.378688	2.97085	0.0142754	0.0944302	-2.81163
100361568	Hilpda	hypoxia inducible lipid droplet-associated	1.51882	0.0176047	2.96728	0.0143623	0.0944302	-2.81712
29669	Psma2	proteasome subunit alpha 2	1.96204	-0.57368	2.96577	0.014399	0.094548	-2.81943
29361	Sox10	SRY box 10	1.67043	0.068404	2.96029	0.0145337	0.0952104	-2.82785
170496	Lcn2	lipocalin 2	1.35674	-0.0285602	2.95327	0.0147077	0.0958146	-2.83862
65204	Cnn1	calponin 1	1.68963	0.23876	2.94693	0.0148668	0.0964046	-2.84835
683007	Mia3	MIA SH3 domain ER export factor 3	1.42922	-0.459287	2.94306	0.0149649	0.096907	-2.8543
85238	Synj1	synaptojanin 1	1.38347	0.340391	2.94248	0.0149797	0.0969578	-2.85519
290561	Tnnc1	troponin C1, slow skeletal and cardiac type	1.75409	0.436499	2.94188	0.0149949	0.0970118	-2.85611
305854	Sall2	spalt-like transcription factor 2	1.55311	-0.784344	2.93974	0.0150496	0.0971646	-2.8594
25418	Dpysl3	dihydropyrimidinase-like 3	1.32998	-0.0987316	2.93782	0.0150985	0.0973622	-2.86233
315131	Kdelr3	KDEL endoplasmic reticulum protein retention receptor 3	1.58555	0.435407	2.93749	0.015107	0.0973622	-2.86284
501203	Myl12a	myosin light chain 12A	1.62244	0.0899867	2.93648	0.0151329	0.0973667	-2.86439
24962	Cth	cystathionine gamma-lyase	1.76764	-0.0752404	2.93613	0.0151421	0.0973814	-2.86494
29566	Ggt5	gamma-glutamyltransferase 5	1.59864	-0.240028	2.93445	0.0151852	0.0974962	-2.86751
288378	Clec4m	C-type lectin domain family 4 member M	1.42488	-0.932069	2.9347	0.0151787	0.0974962	-2.86713
24913	Pla2g16	phospholipase A2, group XVI	1.34854	-0.116782	2.9286	0.0153367	0.0980291	-2.87649
688495	Smim7	small integral membrane protein 7	1.28839	0.464101	2.92846	0.0153403	0.0980291	-2.87671
289419	Nuak2	NUAK family kinase 2	1.56871	0.551714	2.92773	0.0153596	0.098053	-2.87784
300211	Fkbp11	FKBP prolyl isomerase 11	1.42711	0.804522	2.92613	0.0154013	0.0981437	-2.88029
314212	Daam1	dishevelled associated activator of morphogenesis 1	1.36889	0.146223	2.92653	0.0153908	0.0981437	-2.87967
100360334	Fhod3	formin homology 2 domain containing 3	1.4773	-0.529625	2.92202	0.0155091	0.098553	-2.8866
307838	Chst4	carbohydrate sulfotransferase 4	1.59836	-0.104238	2.91933	0.0155801	0.0987093	-2.89073
680971	Ddhd2	DDHD domain containing 2	1.50748	-0.281602	2.91742	0.0156308	0.098887	-2.89366
499755	Tmem141	transmembrane protein 141	1.47623	0.0194313	2.916	0.0156686	0.0990019	-2.89585
298686	Ccnl2	cyclin L2	1.78602	0.235435	2.91425	0.0157152	0.0991628	-2.89853
362857	Tmem263	transmembrane protein 263	1.32707	0.365778	2.91282	0.0157535	0.0992197	-2.90074
362691	Tmem178a	transmembrane protein 178A	1.44423	-0.0175176	2.91084	0.0158064	0.0993816	-2.90376
192211	Prom2	prominin 2	1.3502	-0.567058	2.90873	0.0158632	0.099605	-2.90701
81771	Rps6ka1	ribosomal protein S6 kinase A1	1.30342	0.377748	2.90713	0.0159064	0.0998318	-2.90946
317181	Srpx2	sushi-repeat-containing protein, X-linked 2	1.39416	0.955286	2.90391	0.0159937	0.10029	-2.91441
315714	Loxl1	lysyl oxidase-like 1	1.305	0.484912	2.90055	0.0160851	0.100595	-2.91957
286934	Havcr1	hepatitis A virus cellular receptor 1	1.47347	0.323109	2.89803	0.0161543	0.100815	-2.92344
316638	Sned1	sushi, nidogen and EGF-like domains 1	1.71264	0.00209638	2.89796	0.0161561	0.100815	-2.92355
312688	Usp18	ubiquitin specific peptidase 18	1.50163	0.754525	2.89613	0.0162065	0.101039	-2.92636
25453	Gdnf	glial cell derived neurotrophic factor	1.38578	0.00674386	2.89431	0.0162568	0.101263	-2.92916
360839	Tmem163	transmembrane protein 163	1.72108	0.0296356	2.89363	0.0162755	0.101335	-2.9302
315748	Skor1	SKI family transcriptional corepressor 1	1.71018	-0.0377955	2.88999	0.0163765	0.101606	-2.93579
361288	Fundc2	FUN14 domain containing 2	1.36124	0.360599	2.89018	0.0163712	0.101606	-2.9355
365266	Atp10a	ATPase phospholipid transporting 10A (putative)	1.43683	0.550303	2.88998	0.0163769	0.101606	-2.93582
64619	Zbtb18	zinc finger and BTB domain containing 18	1.72135	0.475142	2.88686	0.016464	0.101966	-2.94061
299762	Tmtc2	transmembrane and tetratricopeptide repeat containing 2	1.35956	0.655975	2.8835	0.0165582	0.10237	-2.94576
29619	Btg2	BTG anti-proliferation factor 2	1.27983	0.83423	2.88319	0.0165668	0.102378	-2.94623
309499	Myof	myoferlin	1.57525	0.288577	2.88199	0.0166007	0.102453	-2.94808
406170	Sapcd1	suppressor APC domain containing 1	1.3587	-0.62318	2.88067	0.016638	0.102637	-2.95011
24560	Cd200	Cd200 molecule	1.33273	0.193805	2.88039	0.016646	0.102642	-2.95054
25585	Id3	inhibitor of DNA binding 3, HLH protein	1.75989	-0.260468	2.87935	0.0166754	0.102725	-2.95214
192274	Foxe1	forkhead box E1	1.59011	-0.102712	2.87616	0.016766	0.103111	-2.95703
116640	Tnc	tenascin C	1.7266	0.759475	2.87507	0.0167971	0.103167	-2.95871
307251	Rnf165	ring finger protein 165	1.75108	0.358209	2.8754	0.0167877	0.103167	-2.9582
498533	Fam167a	family with sequence similarity 167, member A	1.8142	-0.0891834	2.87247	0.0168715	0.103488	-2.9627
499702	Synpo2	synaptopodin 2	1.50571	0.694741	2.87082	0.0169191	0.103537	-2.96524
360893	Taf1a	TATA-box binding protein associated factor, RNA polymerase I subunit A	1.55387	0.390218	2.86995	0.0169442	0.103572	-2.96658
310843	Sec24d	SEC24 homolog D, COPII coat complex component	1.85372	-0.361786	2.86892	0.0169737	0.103663	-2.96816
305792	Kctd6	potassium channel tetramerization domain containing 6	1.50339	0.436393	2.86687	0.017033	0.103844	-2.97131
680726	Rbms3	RNA binding motif, single stranded interacting protein 3	1.50974	0.354919	2.86597	0.0170591	0.103882	-2.97269
365802	Selenot	selenoprotein T	1.52601	0.765493	2.865	0.0170873	0.103915	-2.97418
500853	Rgs22	regulator of G-protein signaling 22	1.32239	-0.446023	2.86495	0.0170889	0.103915	-2.97427
25690	Ahr	aryl hydrocarbon receptor	1.28177	0.11551	2.86411	0.017113	0.103919	-2.97554
81920	Ube2d3	ubiquitin-conjugating enzyme E2D 3	1.62502	-0.127373	2.86425	0.0171092	0.103919	-2.97534
500726	Cep170b	centrosomal protein 170B	1.83853	-0.193743	2.86391	0.0171191	0.103919	-2.97586
171441	Yif1a	Yip1 interacting factor homolog A, membrane trafficking protein	1.34255	0.792035	2.86017	0.0172281	0.104341	-2.9816
64186	Ascl1	achaete-scute family bHLH transcription factor 1	1.37612	0.123811	2.85937	0.0172517	0.104408	-2.98283
291444	Prrc1	proline-rich coiled-coil 1	1.76893	0.197401	2.85823	0.0172851	0.104566	-2.98458
307949	Pcnx2	pecanex 2	1.3911	-0.00500111	2.85064	0.0175097	0.105245	-2.99624
24185	Akt1	AKT serine/threonine kinase 1	1.3295	0.171406	2.85021	0.0175225	0.105277	-2.9969
108350833	LOC108350833	uncharacterized LOC108350833	1.29811	-0.379224	2.84674	0.0176263	0.10563	-3.00223
360546	Efnb3	ephrin B3	1.4832	-0.179787	2.84638	0.0176371	0.105632	-3.00279
116728	Sept5	septin 5	1.34386	1.07033	2.84304	0.0177377	0.105939	-3.00792
292876	Josd2	Josephin domain containing 2	1.92859	-0.0660216	2.84315	0.0177344	0.105939	-3.00775
287835	Galk1	galactokinase 1	1.54703	0.00657697	2.84082	0.0178048	0.106157	-3.01133
364786	Itga8	integrin subunit alpha 8	1.57328	0.814113	2.84089	0.0178027	0.106157	-3.01122
362325	Mdfic	MyoD family inhibitor domain containing	1.37271	0.360074	2.83984	0.0178345	0.106244	-3.01284
362945	Lrrc24	leucine rich repeat containing 24	1.71842	0.0291186	2.8363	0.0179421	0.106704	-3.01827
108352149	LOC108352149	uncharacterized LOC108352149	1.45236	0.478925	2.83529	0.017973	0.106738	-3.01982
24261	Chrnb1	cholinergic receptor nicotinic beta 1 subunit	1.70289	-0.0551824	2.83221	0.0180676	0.107043	-3.02456
300759	Parp6	poly (ADP-ribose) polymerase family, member 6	1.53751	-0.689188	2.83235	0.0180631	0.107043	-3.02433
360857	Rgs16	regulator of G-protein signaling 16	1.33327	-0.316611	2.83222	0.0180672	0.107043	-3.02454
311592	RGD1563354	similar to hypothetical protein D630003M21	1.43167	0.0581574	2.83088	0.0181083	0.107116	-3.02659
81707	Mmp14	matrix metallopeptidase 14	1.25003	0.451818	2.82878	0.0181732	0.10731	-3.02982
361437	Dbndd1	dysbindin domain containing 1	1.71821	0.314198	2.82872	0.0181752	0.10731	-3.02992
56806	Adam2	ADAM metallopeptidase domain 2	1.78206	-0.434976	2.82701	0.0182279	0.10745	-3.03254
79210	Fstl1	follistatin-like 1	1.59843	0.470068	2.82717	0.0182231	0.10745	-3.0323
298068	Sec61b	Sec61 translocon beta subunit	1.4025	-0.306722	2.82476	0.0182979	0.107637	-3.03599
288092	Tmem39a	transmembrane protein 39a	1.47738	0.901065	2.82323	0.0183457	0.107738	-3.03835
310091	Slc38a9	solute carrier family 38, member 9	1.33927	0.380987	2.82334	0.0183421	0.107738	-3.03817
29714	Ptprn2	protein tyrosine phosphatase, receptor type N2	1.531	0.113648	2.82246	0.0183696	0.107791	-3.03953
81506	Bst1	bone marrow stromal cell antigen 1	1.86588	-0.235178	2.81768	0.0185199	0.108399	-3.04688
361441	Fam89a	family with sequence similarity 89, member A	1.49077	0.195764	2.81625	0.0185648	0.108617	-3.04907
25365	Actg2	actin, gamma 2, smooth muscle, enteric	1.43547	0.204873	2.81522	0.0185974	0.108635	-3.05065
501122	Amer3	APC membrane recruitment protein 3	2.05417	-0.0901345	2.81542	0.0185912	0.108635	-3.05035
685131	Mea1	male-enhanced antigen 1	1.5606	-0.655768	2.81183	0.0187051	0.108976	-3.05586
252858	Frmd4b	FERM domain containing 4B	1.4731	0.205933	2.81067	0.0187422	0.109047	-3.05765
361068	Nudt18	nudix hydrolase 18	1.78845	-0.28387	2.80655	0.0188741	0.10947	-3.06398
59323	Erbb4	erb-b2 receptor tyrosine kinase 4	1.89069	0.0134524	2.8057	0.0189013	0.109537	-3.06528
360973	Gas2l1	growth arrest-specific 2 like 1	1.56812	0.117179	2.80535	0.0189126	0.109557	-3.06582
25590	Chrna4	cholinergic receptor nicotinic alpha 4 subunit	2.063	0.0663234	2.80436	0.0189444	0.109606	-3.06733
311547	Foxs1	forkhead box S1	1.65023	0.70226	2.80463	0.0189359	0.109606	-3.06693
311209	Tp53i11	tumor protein p53 inducible protein 11	1.43669	-0.292255	2.79977	0.0190931	0.109962	-3.07439
315151	Mrtfa	myocardin related transcription factor A	2.00668	-0.163195	2.79994	0.0190874	0.109962	-3.07412
287877	Pycr1	pyrroline-5-carboxylate reductase 1	1.842	-0.569726	2.79886	0.0191227	0.110046	-3.07579
65196	B4galt6	beta-1,4-galactosyltransferase 6	1.38989	-0.395148	2.79802	0.0191501	0.110117	-3.07708
66016	Kcnmb4	potassium calcium-activated channel subfamily M regulatory beta subunit 4	1.618	-0.291904	2.79587	0.0192201	0.110249	-3.08037
83720	Fat1	FAT atypical cadherin 1	1.39842	0.0976474	2.79497	0.0192498	0.110374	-3.08176
300870	Tent5a	terminal nucleotidyltransferase 5A	1.4038	0.554724	2.79428	0.0192724	0.110414	-3.08282
303382	Rasl10b	RAS-like, family 10, member B	2.11389	-0.0494873	2.79439	0.0192688	0.110414	-3.08265
295549	Dnajb4	DnaJ heat shock protein family (Hsp40) member B4	1.45161	-0.240148	2.79248	0.0193315	0.110533	-3.08558
116699	Inpp4b	inositol polyphosphate-4-phosphatase type II B	1.34427	0.361623	2.79022	0.019406	0.110818	-3.08905
116666	Lman1	lectin, mannose-binding, 1	1.28387	1.02446	2.78926	0.0194379	0.110909	-3.09053
311483	Rrbp1	ribosome binding protein 1	1.24186	0.777833	2.78903	0.0194455	0.110909	-3.09089
24561	Mpg	N-methylpurine-DNA glycosylase	1.46198	-0.456141	2.78729	0.0195032	0.111103	-3.09356
29492	Notch2	notch 2	1.49818	0.546545	2.78739	0.0194999	0.111103	-3.0934
287796	Slc39a11	solute carrier family 39, member 11	1.28204	-0.673356	2.78586	0.0195507	0.111238	-3.09576
308958	Cdr2	cerebellar degeneration-related protein 2	1.25528	0.892841	2.78422	0.0196054	0.111485	-3.09827
679894	LOC679894	similar to THO complex subunit 2 (Tho2)	1.6079	-0.0748587	2.78408	0.01961	0.111485	-3.09849
170714	Dynlrb1	dynein light chain roadblock-type 1	1.53059	0.177349	2.7834	0.0196329	0.111525	-3.09954
292710	Ethe1	ETHE1, persulfide dioxygenase	1.72857	-0.51531	2.78259	0.0196599	0.111624	-3.10078
294255	Slc44a4	solute carrier family 44, member 4	1.40422	0.0575543	2.78009	0.0197435	0.111786	-3.10461
289827	Ugp2	UDP-glucose pyrophosphorylase 2	1.26903	-0.936638	2.77829	0.0198043	0.112001	-3.10738
294103	Papss2	3'-phosphoadenosine 5'-phosphosulfate synthase 2	1.34098	0.411148	2.77628	0.0198723	0.112115	-3.11047
685384	Rnf180	ring finger protein 180	1.5097	-0.416824	2.77071	0.0200617	0.112912	-3.11902
313445	Klhl13	kelch-like family member 13	1.25201	0.0866388	2.76965	0.020098	0.112974	-3.12065
29322	Plcb3	phospholipase C beta 3	1.39842	0.346349	2.7679	0.0201579	0.113168	-3.12334
108352092	LOC108352092	uncharacterized LOC108352092	1.85079	0.183581	2.76512	0.0202535	0.113492	-3.1276
688749	Tulp3	tubby-like protein 3	1.28045	-0.886757	2.76396	0.0202935	0.113503	-3.12938
192183	Nectin1	nectin cell adhesion molecule 1	1.23271	0.188687	2.76031	0.0204202	0.113927	-3.13499
290637	Colgalt1	collagen beta(1-O)galactosyltransferase 1	1.22646	0.953308	2.7605	0.0204134	0.113927	-3.13469
498087	Stfa2l2	stefin A2-like 2	1.62439	0.304133	2.75988	0.0204349	0.113929	-3.13564
114519	Nfil3	nuclear factor, interleukin 3 regulated	1.24291	0.432335	2.7574	0.0205217	0.114142	-3.13946
305268	Uba6	ubiquitin-like modifier activating enzyme 6	1.34886	0.0199999	2.75703	0.0205345	0.114142	-3.14002
363760	Arl6	ADP-ribosylation factor like GTPase 6	1.24043	-0.726979	2.75218	0.0207047	0.11456	-3.14746
691889	Atp8a2	ATPase phospholipid transporting 8A2	1.40017	-0.676896	2.75174	0.0207205	0.114602	-3.14815
314751	Tmcc3	transmembrane and coiled-coil domain family 3	1.3778	-0.427451	2.74993	0.0207845	0.114641	-3.15093
361328	Snx24	sorting nexin 24	1.59395	-0.0189824	2.75074	0.0207556	0.114641	-3.14967
25431	Dlx5	distal-less homeobox 5	1.49303	0.119173	2.74858	0.0208324	0.114768	-3.153
294520	Mical1	microtubule associated monooxygenase, calponin and LIM domain containing 1	1.63572	0.620442	2.74831	0.0208419	0.114768	-3.15342
362558	Lrp8	LDL receptor related protein 8	1.21369	0.850369	2.74812	0.0208484	0.114768	-3.1537
292657	Slc1a5	solute carrier family 1 member 5	1.24481	0.52977	2.74567	0.0209358	0.11483	-3.15746
102552294	LOC102552294	uncharacterized LOC102552294	1.53457	0.277558	2.74665	0.0209009	0.11483	-3.15596
309169	Ehbp1l1	EH domain binding protein 1-like 1	1.6013	0.576592	2.74489	0.0209636	0.114905	-3.15866
24356	Ets1	ETS proto-oncogene 1, transcription factor	1.22437	0.845879	2.74128	0.0210928	0.115067	-3.1642
64188	Mafg	MAF bZIP transcription factor G	1.41651	0.262776	2.74167	0.021079	0.115067	-3.16361
288692	Wsb2	WD repeat and SOCS box-containing 2	1.50571	0.694014	2.74156	0.021083	0.115067	-3.16378
303608	Ftsj3	FtsJ RNA methyltransferase homolog 3	1.63757	0.324976	2.74224	0.0210586	0.115067	-3.16273
29468	Pdia3	protein disulfide isomerase family A, member 3	1.68477	0.334234	2.73415	0.0213506	0.116103	-3.17514
246760	Mafk	MAF bZIP transcription factor K	1.3409	1.00024	2.73365	0.0213687	0.116103	-3.17591
363989	Phlda3	pleckstrin homology-like domain, family A, member 3	1.37749	0.24795	2.7318	0.0214364	0.11632	-3.17875
25133	Pcdhb12	protocadherin beta 12	1.61528	-0.385093	2.72731	0.0216009	0.116449	-3.18564
289276	Adss	adenylosuccinate synthase	1.64988	-0.236482	2.7274	0.0215976	0.116449	-3.1855
303700	Usp36	ubiquitin specific peptidase 36	1.56261	0.539073	2.72882	0.0215455	0.116449	-3.18333
312826	Cmas	cytidine monophosphate N-acetylneuraminic acid synthetase	1.25128	-0.606157	2.72901	0.0215383	0.116449	-3.18303
305302	Rasl11b	RAS-like family 11 member B	1.20055	0.112345	2.72628	0.0216389	0.116476	-3.18722
499342	Cd274	CD274 molecule	1.84614	0.12639	2.72474	0.0216958	0.116707	-3.18959
59109	Ntrk1	neurotrophic receptor tyrosine kinase 1	1.84856	-0.449936	2.72398	0.021724	0.116755	-3.19076
500292	Cidec	cell death-inducing DFFA-like effector c	1.72019	-0.430197	2.72292	0.0217631	0.116876	-3.19238
291942	Slc10a7	solute carrier family 10, member 7	1.48621	-0.221601	2.72187	0.0218019	0.116995	-3.19398
498685	Prxl2c	peroxiredoxin like 2C	1.9128	-0.199367	2.72189	0.0218013	0.116995	-3.19396
29496	Erbb3	erb-b2 receptor tyrosine kinase 3	1.23262	0.120423	2.71641	0.022006	0.117776	-3.20238
364154	Smim14	small integral membrane protein 14	1.25046	-0.169338	2.71561	0.0220359	0.117891	-3.2036
24457	Hoxb8	homeo box B8	1.3621	-0.0990465	2.71411	0.0220922	0.118147	-3.2059
361430	Piezo1	piezo-type mechanosensitive ion channel component 1	1.77386	-0.149689	2.71365	0.0221096	0.118195	-3.20661
684297	Kdm7a	lysine demethylase 7A	1.23121	0.358236	2.70581	0.0224068	0.119255	-3.21863
29575	Tcea2	transcription elongation factor A2	1.65736	-0.28931	2.70353	0.0224942	0.119384	-3.22213
64534	Pim3	Pim-3 proto-oncogene, serine/threonine kinase	1.1738	1.06435	2.7042	0.0224685	0.119384	-3.2211
306347	Ell	elongation factor for RNA polymerase II	1.58017	0.484805	2.70379	0.0224839	0.119384	-3.22172
64355	Lsr	lipolysis stimulated lipoprotein receptor	1.32903	-0.467832	2.70195	0.0225547	0.119569	-3.22455
81639	Alox15	arachidonate 15-lipoxygenase	1.82032	-0.1817	2.7014	0.0225758	0.119597	-3.22539
361422	Cotl1	coactosin-like F-actin binding protein 1	1.37112	-0.555659	2.70015	0.0226239	0.11964	-3.22731
362938	Scrib	scribbled planar cell polarity protein	1.68991	-0.550133	2.69943	0.0226518	0.119684	-3.22842
29439	Jtb	jumping translocation breakpoint	1.57128	-0.0914582	2.69858	0.0226847	0.119768	-3.22972
25066	PVR	poliovirus receptor	1.18899	0.968033	2.69799	0.0227075	0.119798	-3.23063
246238	Bpifa1	BPI fold containing family A, member 1	1.48546	0.0880518	2.69766	0.0227202	0.11982	-3.23113
29189	Fdx1	ferredoxin 1	1.45255	-0.174973	2.69416	0.0228559	0.120214	-3.23649
299117	Nin	ninein	1.35582	-0.00475379	2.69273	0.0229118	0.12042	-3.23869
301012	Col7a1	collagen type VII alpha 1 chain	1.48181	-0.141499	2.6903	0.0230069	0.120653	-3.24242
313770	Mxra8	matrix remodeling associated 8	1.81947	-0.602264	2.68941	0.0230417	0.120791	-3.24377
689618	LOC689618	similar to Protein C20orf85 homolog	1.97267	0.500304	2.68872	0.0230691	0.120844	-3.24484
25596	Rpn1	ribophorin I	1.41169	-0.303255	2.68668	0.0231493	0.120911	-3.24797
29422	Chrne	cholinergic receptor nicotinic epsilon subunit	1.44719	0.581505	2.68765	0.023111	0.120911	-3.24648
79426	Zfp36	zinc finger protein 36	1.23615	0.906724	2.68556	0.0231934	0.120911	-3.24968
360627	Fkbp10	FKBP prolyl isomerase 10	1.63336	-0.0124668	2.68636	0.023162	0.120911	-3.24846
362281	Rae1	ribonucleic acid export 1	1.85204	-0.408782	2.6879	0.0231011	0.120911	-3.24609
500131	Creb5	cAMP responsive element binding protein 5	1.33373	0.135864	2.68556	0.0231936	0.120911	-3.24969
84496	Stau1	staufen double-stranded RNA binding protein 1	1.36258	-0.715062	2.6851	0.0232118	0.120961	-3.25039
25433	Hbegf	heparin-binding EGF-like growth factor	1.32801	0.710811	2.68313	0.0232896	0.121097	-3.2534
103691564	LOC103691564	uncharacterized LOC103691564	1.29104	0.81722	2.68326	0.0232847	0.121097	-3.25321
296076	Srp14	signal recognition particle 14	1.62427	0.212626	2.68197	0.0233358	0.121203	-3.25519
500989	Zpr1	ZPR1 zinc finger	1.42125	-0.693919	2.68054	0.0233927	0.121364	-3.25738
296649	Rabepk	Rab9 effector protein with kelch motifs	1.3201	-0.759936	2.68007	0.0234116	0.121418	-3.25811
317628	Apex2	apurinic/apyrimidinic endodeoxyribonuclease 2	1.49845	-0.0602965	2.67855	0.0234723	0.121598	-3.26043
296758	Armc10	armadillo repeat containing 10	1.19633	-0.750105	2.67788	0.0234989	0.121691	-3.26145
365493	Cacul1	CDK2-associated, cullin domain 1	1.30921	0.942619	2.67614	0.0235686	0.121738	-3.26412
311429	Spef1	sperm flagellar 1	1.69472	-0.713392	2.67507	0.0236118	0.121848	-3.26576
293561	Rnf152	ring finger protein 152	1.20684	-0.72122	2.67207	0.023733	0.122193	-3.27037
301432	Ppil3	peptidylprolyl isomerase like 3	1.92566	-0.00880939	2.67202	0.023735	0.122193	-3.27044
25655	Gja4	gap junction protein, alpha 4	1.38394	-0.653802	2.67	0.0238169	0.122491	-3.27354
56010	Ywhag	tyrosine 3-monooxygenase/tryptophan 5-monooxygenase activation protein, gamma	1.67429	0.101284	2.66957	0.0238341	0.122524	-3.27419
362011	Dram2	DNA-damage regulated autophagy modulator 2	1.20917	-0.448613	2.66744	0.0239207	0.122773	-3.27745
293058	Ramac	RNA guanine-7 methyltransferase activating subunit	1.36338	-0.253983	2.65893	0.0242701	0.123634	-3.29049
312257	Dennd2a	DENN domain containing 2A	1.33969	-0.349344	2.65966	0.02424	0.123634	-3.28938
361504	Rdh13	retinol dehydrogenase 13	1.49246	-0.505997	2.65919	0.0242593	0.123634	-3.29009
103693432	Ptges3l	prostaglandin E synthase 3 like	1.83042	0.0463648	2.66077	0.0241942	0.123634	-3.28768
114590	Ubqln1	ubiquilin 1	1.69057	-0.581756	2.65753	0.024328	0.123797	-3.29264
252899	Miox	myo-inositol oxygenase	1.47388	-0.277715	2.65693	0.0243532	0.123835	-3.29357
498366	Fam114a1	family with sequence similarity 114, member A1	1.64687	-0.468591	2.65696	0.0243517	0.123835	-3.29351
192271	Adam6a	a disintegrin and metallopeptidase domain 6A	1.73773	-0.283717	2.65453	0.024453	0.123895	-3.29724
65166	Sec11a	SEC11 homolog A, signal peptidase complex subunit	1.48152	0.0118218	2.65324	0.0245068	0.124078	-3.29922
29182	Cdh22	cadherin 22	1.59959	-3.25018e-05	2.653	0.0245169	0.124084	-3.29959
288615	Sbds	SBDS, ribosome maturation factor	1.66176	0.718053	2.65025	0.024632	0.124532	-3.3038
114508	Fbp2	fructose-bisphosphatase 2	1.51946	0.00751434	2.64624	0.0248009	0.125162	-3.30994
361042	Pck2	phosphoenolpyruvate carboxykinase 2 (mitochondrial)	1.74579	-0.140835	2.64336	0.0249228	0.125262	-3.31435
103693946	LOC103693946	uncharacterized LOC103693946	1.47742	-0.0547973	2.64235	0.0249658	0.125279	-3.3159
81522	Mtr	5-methyltetrahydrofolate-homocysteine methyltransferase	1.61606	-0.315983	2.64034	0.0250514	0.12543	-3.31897
113898	Prdx5	peroxiredoxin 5	1.56165	-0.64718	2.6366	0.0252116	0.125834	-3.3247
304543	Mlec	malectin	1.54035	0.130962	2.6329	0.025371	0.12645	-3.33036
25553	Slc6a4	solute carrier family 6 member 4	1.8667	0.297979	2.6326	0.0253839	0.12647	-3.33082
29702	Eif2ak3	eukaryotic translation initiation factor 2 alpha kinase 3	1.40015	-0.00156259	2.63176	0.0254205	0.126518	-3.33211
313743	Klhl21	kelch-like family member 21	1.45116	-0.0148781	2.63189	0.0254149	0.126518	-3.33191
83476	Ccn1	cellular communication network factor 1	1.15999	0.586488	2.62631	0.0256574	0.127358	-3.34044
312709	Mlf2	myeloid leukemia factor 2	1.6962	0.0926307	2.62588	0.0256762	0.127378	-3.3411
680115	Hacd1	3-hydroxyacyl-CoA dehydratase 1	1.5361	0.220838	2.62571	0.0256838	0.127378	-3.34137
289874	Erlec1	endoplasmic reticulum lectin 1	1.16932	-0.0219199	2.62408	0.0257552	0.127598	-3.34386
114202	Mpp3	membrane palmitoylated protein 3	1.36997	-0.430546	2.62286	0.025809	0.127691	-3.34573
116596	Map3k8	mitogen-activated protein kinase kinase kinase 8	1.61415	0.100343	2.62282	0.0258105	0.127691	-3.34579
246326	Zdhhc2	zinc finger, DHHC-type containing 2	1.52417	0.211796	2.6176	0.0260414	0.128409	-3.35378
296345	Jph2	junctophilin 2	1.16323	0.913985	2.61726	0.0260561	0.128409	-3.35429
361253	Sugct	succinylCoA:glutarate-CoA transferase	1.3494	0.248912	2.6169	0.0260723	0.128444	-3.35485
362998	Dnajc22	DnaJ heat shock protein family (Hsp40) member C22	1.54318	0.467475	2.61593	0.0261154	0.128566	-3.35633
59085	Asl	argininosuccinate lyase	1.37388	-0.376762	2.6149	0.0261611	0.128701	-3.3579
100912849	LOC100912849	uncharacterized LOC100912849	1.72365	-0.4348	2.61437	0.0261848	0.128773	-3.35872
114210	Spata2	spermatogenesis associated 2	1.22021	0.371267	2.61338	0.0262289	0.128899	-3.36023
360854	Arpc5	actin related protein 2/3 complex, subunit 5	1.38179	0.560564	2.61237	0.0262743	0.128942	-3.36178
299276	Serpina3m	serine (or cysteine) proteinase inhibitor, clade A, member 3M	1.28784	-0.670661	2.61109	0.0263315	0.129178	-3.36373
287408	Myh1	myosin heavy chain 1	1.26495	1.22598	2.60852	0.0264472	0.12943	-3.36767
360643	Cdc27	cell division cycle 27	1.2299	0.257765	2.60862	0.0264426	0.12943	-3.36751
83471	Prep	prolyl endopeptidase	1.32648	-0.137625	2.60534	0.0265909	0.12953	-3.37253
85253	Plg	plasminogen	1.29367	-0.258586	2.60513	0.0266002	0.12953	-3.37284
116562	Il2	interleukin 2	1.6061	0.150804	2.60522	0.0265964	0.12953	-3.37272
289014	Mapkapk2	mitogen-activated protein kinase-activated protein kinase 2	1.61505	-0.210662	2.60502	0.0266056	0.12953	-3.37303
302470	F8	coagulation factor VIII	1.12217	0.980683	2.60774	0.0264825	0.12953	-3.36887
313245	Polr1e	RNA polymerase I subunit E	1.83488	-0.222232	2.60654	0.0265367	0.12953	-3.3707
365797	Ufm1	ubiquitin-fold modifier 1	1.388	0.390928	2.60597	0.0265625	0.12953	-3.37157
24886	Tbxas1	thromboxane A synthase 1	1.43368	-0.227424	2.60236	0.026726	0.12989	-3.37708
363015	Endod1	endonuclease domain containing 1	1.39174	0.389556	2.60199	0.0267431	0.129928	-3.37765
689106	Vstm2a	V-set and transmembrane domain containing 2A	1.34693	0.584968	2.59858	0.0268987	0.130393	-3.38286
252891	Sra1	steroid receptor RNA activator 1	1.54427	-0.69653	2.59478	0.0270734	0.130945	-3.38867
500235	Emx1	empty spiracles homeobox 1	1.57898	0.26213	2.59284	0.0271635	0.131245	-3.39165
294079	March5	membrane associated ring-CH-type finger 5	1.37678	-0.716112	2.58924	0.0273303	0.131779	-3.39714
29427	Aif1	allograft inflammatory factor 1	1.61597	-0.111535	2.58798	0.027389	0.132017	-3.39906
29311	Msmb	microseminoprotein, beta	1.21721	-0.277557	2.58765	0.0274047	0.132018	-3.39958
282844	Rffl	ring finger and FYVE-like domain containing E3 ubiquitin protein ligase	1.88777	0.0131411	2.58539	0.0275104	0.132344	-3.40303
362051	Lmo4	LIM domain only 4	1.58737	-0.132907	2.58318	0.0276142	0.132603	-3.40641
303553	Rnd2	Rho family GTPase 2	1.49119	-0.10516	2.58097	0.027718	0.132784	-3.40978
362826	Atcay	ATCAY, caytaxin	1.36737	-0.0669683	2.58135	0.0277003	0.132784	-3.4092
292130	Afap1l2	actin filament associated protein 1-like 2	1.44193	0.595181	2.57974	0.0277764	0.133019	-3.41166
56646	Lgals1	galectin 1	1.47067	0.254854	2.57946	0.0277896	0.133036	-3.41209
65165	Tmed2	transmembrane p24 trafficking protein 2	1.4034	0.319077	2.57803	0.0278572	0.133179	-3.41427
282708	Afm	afamin	1.33289	-0.102451	2.57762	0.0278767	0.133196	-3.41489
84592	Cetn1	centrin 1	1.3889	0.422663	2.57715	0.0278993	0.133199	-3.41562
312437	Krcc1	lysine-rich coiled-coil 1	1.29571	0.602784	2.57674	0.0279186	0.133246	-3.41624
171074	Hdgfl1	HDGF like 1	1.55203	-0.319211	2.57492	0.0280051	0.133459	-3.41901
691920	Stard9	StAR-related lipid transfer domain containing 9	1.25972	0.899468	2.57441	0.0280298	0.133504	-3.4198
306253	Glt8d1	glycosyltransferase 8 domain containing 1	1.15949	-0.353423	2.57355	0.0280709	0.133565	-3.42112
25494	Nid1	nidogen 1	1.40116	0.0996499	2.57217	0.0281368	0.13368	-3.42322
192242	Akr1d1	aldo-keto reductase family 1, member D1	1.60804	-0.530736	2.57177	0.028156	0.133698	-3.42383
310960	Usp33	ubiquitin specific peptidase 33	1.28029	-0.542211	2.57052	0.0282161	0.133827	-3.42574
362567	Pomgnt1	protein O-linked mannose N-acetylglucosaminyltransferase 1 (beta 1,2-)	1.1567	0.537576	2.56879	0.0282994	0.133978	-3.42839
117279	Cflar	CASP8 and FADD-like apoptosis regulator	1.26096	0.523809	2.56814	0.0283305	0.134012	-3.42937
360949	Cpeb2	cytoplasmic polyadenylation element binding protein 2	1.26098	0.640169	2.5657	0.0284485	0.134382	-3.4331
289318	Tmem63a	transmembrane protein 63a	1.32517	-0.335335	2.56179	0.0286386	0.134851	-3.43906
117542	Baiap2	BAI1-associated protein 2	1.60891	-0.254732	2.55969	0.0287414	0.13502	-3.44228
29221	Arg1	arginase 1	1.18164	-0.142753	2.55826	0.0288115	0.135187	-3.44446
64032	Ccn2	cellular communication network factor 2	1.39711	0.405342	2.5581	0.0288194	0.135187	-3.44471
29435	Ssr4	signal sequence receptor subunit 4	1.46024	-0.0715555	2.55549	0.0289477	0.135445	-3.44868
171439	Bzw2	basic leucine zipper and W2 domains 2	1.31836	-0.0137668	2.55568	0.0289385	0.135445	-3.4484
311355	Ppip5k1	diphosphoinositol pentakisphosphate kinase 1	1.26598	0.133777	2.55513	0.0289656	0.135484	-3.44924
25673	Anxa5	annexin A5	1.39826	-0.700307	2.5547	0.0289864	0.135536	-3.44988
114116	Cdc42bpa	CDC42 binding protein kinase alpha	1.20322	0.204124	2.55266	0.0290876	0.13574	-3.45301
300689	Rexo2	RNA exonuclease 2	1.74269	-0.300471	2.55227	0.0291071	0.13574	-3.4536
315346	Itga5	integrin subunit alpha 5	1.19936	0.584275	2.5515	0.0291451	0.135827	-3.45477
310909	Rap1gds1	Rap1 GTPase-GDP dissociation stimulator 1	1.26794	0.866145	2.55098	0.0291708	0.135902	-3.45556
25288	Acsl1	acyl-CoA synthetase long-chain family member 1	1.22979	0.36445	2.55026	0.0292066	0.135921	-3.45666
293694	Map4k2	mitogen activated protein kinase kinase kinase kinase 2	1.42868	0.180904	2.55038	0.0292007	0.135921	-3.45648
266715	Fzd3	frizzled class receptor 3	1.38444	-0.143935	2.54872	0.0292835	0.136201	-3.45902
140734	Dynll2	dynein light chain LC8-type 2	1.2476	-0.267958	2.5469	0.0293743	0.136553	-3.46179
500795	RGD1562114	RGD1562114	1.537	-0.231588	2.54679	0.0293799	0.136553	-3.46196
296500	Dlx1	distal-less homeobox 1	1.24235	0.65337	2.54492	0.0294735	0.136723	-3.46481
102555876	LOC102555876	uncharacterized LOC102555876	1.50869	0.640945	2.54541	0.0294488	0.136723	-3.46406
291388	Cbln2	cerebellin 2 precursor	1.24711	-0.453608	2.54226	0.0296073	0.136983	-3.46887
308779	Fsd2	fibronectin type III and SPRY domain containing 2	1.78389	-0.481329	2.54226	0.0296071	0.136983	-3.46886
316521	Vil1	villin 1	1.67138	-0.249649	2.54252	0.0295939	0.136983	-3.46846
83835	Chic2	cysteine-rich hydrophobic domain 2	1.50144	-0.0597831	2.54157	0.0296419	0.137053	-3.46991
301118	Acer1	alkaline ceramidase 1	1.68665	0.0694534	2.53923	0.0297602	0.137328	-3.47348
303740	Slc38a10	solute carrier family 38, member 10	1.11844	-1.14319	2.53683	0.0298822	0.137536	-3.47714
362142	Bbs5	Bardet-Biedl syndrome 5	1.22837	-0.574303	2.53526	0.029962	0.137718	-3.47953
360639	Dcakd	dephospho-CoA kinase domain containing	1.17266	0.599258	2.5344	0.0300061	0.137875	-3.48085
362049	Unc5c	unc-5 netrin receptor C	1.50693	-0.0652913	2.53263	0.0300969	0.138049	-3.48355
685216	Wfdc10	WAP four-disulfide core domain 10	1.46224	-0.290682	2.53296	0.0300798	0.138049	-3.48304
690038	Bag2	Bcl2-associated athanogene 2	1.61926	0.182883	2.53162	0.0301485	0.138213	-3.48508
84478	Ufd1	ubiquitin recognition factor in ER associated degradation 1	1.68311	-0.407353	2.53039	0.0302118	0.138413	-3.48696
303245	Senp3	SUMO specific peptidase 3	1.5533	-0.457109	2.52986	0.0302391	0.138448	-3.48777
309301	Rcl1	RNA terminal phosphate cyclase-like 1	1.74766	-0.0666293	2.52774	0.0303484	0.138858	-3.491
102550553	LOC102550553	uncharacterized LOC102550553	1.45753	0.0198061	2.52781	0.0303446	0.138858	-3.49089
296048	Lpcat4	lysophosphatidylcholine acyltransferase 4	1.32861	0.74698	2.52733	0.0303697	0.138911	-3.49163
363634	Kctd11	potassium channel tetramerization domain containing 11	1.25812	0.12642	2.5263	0.0304226	0.139062	-3.49319
84013	Hsd17b12	hydroxysteroid (17-beta) dehydrogenase 12	1.50925	0.308376	2.5251	0.0304853	0.139175	-3.49503
362107	Aif1l	allograft inflammatory factor 1-like	1.13425	0.765823	2.52521	0.0304795	0.139175	-3.49486
497957	RGD1565611	RGD1565611	1.40587	-0.214077	2.52501	0.0304895	0.139175	-3.49515
499765	Cfap77	cilia and flagella associated protein 77	1.2081	0.100384	2.52457	0.0305127	0.139202	-3.49583
312974	Chd7	chromodomain helicase DNA binding protein 7	1.30893	-0.321266	2.52238	0.0306263	0.139562	-3.49916
295027	Pcdh18	protocadherin 18	1.33434	-0.576347	2.51779	0.0308666	0.140452	-3.50615
654482	Cfap300	cilia and flagella associated protein 300	1.22122	-0.41052	2.51796	0.030858	0.140452	-3.5059
305240	G3bp2	G3BP stress granule assembly factor 2	1.4064	-0.638423	2.51551	0.0309868	0.140772	-3.50963
308523	Tshz3	teashirt zinc finger homeobox 3	1.61257	-0.647714	2.51453	0.0310385	0.140918	-3.51112
500824	Fgd6	FYVE, RhoGEF and PH domain containing 6	1.44659	-0.560759	2.5127	0.0311353	0.141173	-3.51391
688459	LOC688459	hypothetical protein LOC688459	1.39934	0.227388	2.51167	0.0311899	0.141238	-3.51547
306424	Mfap3l	microfibril associated protein 3 like	1.33993	-0.28427	2.51033	0.0312611	0.14147	-3.51751
114562	Cdc37	cell division cycle 37	1.56178	-0.39939	2.5096	0.0313002	0.141601	-3.51863
362918	Mtss1	MTSS1, I-BAR domain containing	1.19157	-0.642138	2.50643	0.0314691	0.142228	-3.52344
366959	Gcat	glycine C-acetyltransferase	1.18992	-0.265012	2.50522	0.0315345	0.142249	-3.5253
680860	Eppk1	epiplakin 1	1.38787	0.00276106	2.50563	0.0315124	0.142249	-3.52467
29662	Gdi2	GDP dissociation inhibitor 2	1.16545	-0.411404	2.50392	0.031604	0.142468	-3.52727
306197	Tm9sf2	transmembrane 9 superfamily member 2	1.60007	-0.240759	2.50375	0.0316133	0.142468	-3.52753
65158	Rab2a	RAB2A, member RAS oncogene family	1.4318	-0.161904	2.50315	0.0316457	0.142568	-3.52845
298584	Capzb	capping actin protein of muscle Z-line subunit beta	1.60012	0.0173491	2.50284	0.0316623	0.142597	-3.52892
29520	Padi3	peptidyl arginine deiminase 3	1.26578	0.850955	2.49634	0.0320142	0.143292	-3.5388
81917	Hip1r	huntingtin interacting protein 1 related	1.66785	0.545736	2.49871	0.0318856	0.143292	-3.5352
294012	Borcs7	BLOC-1 related complex subunit 7	1.36816	0.363915	2.49832	0.0319066	0.143292	-3.53579
309816	Lama4	laminin subunit alpha 4	1.14622	-0.252647	2.49652	0.0320049	0.143292	-3.53854
686310	Ephb4	EPH receptor B4	1.15955	-0.236887	2.49826	0.0319102	0.143292	-3.53589
108350052	NEWGENE_1592020	protease, serine 48	1.27029	-0.571727	2.49691	0.0319832	0.143292	-3.53793
362484	Plekhf2	pleckstrin homology and FYVE domain containing 2	1.29087	0.741301	2.49454	0.0321127	0.143498	-3.54154
25130	Stx2	syntaxin 2	1.68757	0.604366	2.49177	0.0322643	0.143952	-3.54575
24926	Ceacam3	carcinoembryonic antigen-related cell adhesion molecule 3	1.20581	0.796267	2.49054	0.0323317	0.144089	-3.54762
64044	Casp8	caspase 8	1.28431	0.558149	2.48994	0.0323648	0.144159	-3.54853
293823	Prune2	prune homolog 2 with BCH domain	1.17694	0.807778	2.48886	0.0324247	0.144365	-3.55018
116668	Myt1l	myelin transcription factor 1-like	1.29169	0.146766	2.48479	0.0326499	0.145002	-3.55637
297566	Atp6v1e1	ATPase H+ transporting V1 subunit E1	1.14626	-0.513209	2.48483	0.0326474	0.145002	-3.5563
296608	RGD1306233	similar to hypothetical protein MGC29761	1.48534	-0.420703	2.48328	0.0327339	0.145153	-3.55866
297113	Gars	glycyl-tRNA synthetase	1.37297	0.21297	2.48288	0.0327562	0.145153	-3.55927
302247	Rtraf	RNA transcription, translation and transport factor	1.52412	-0.607811	2.48293	0.0327531	0.145153	-3.55919
497009	Naaa	N-acylethanolamine acid amidase	1.24942	-0.194268	2.48011	0.0329105	0.145653	-3.56347
114106	Bco1	beta-carotene oxygenase 1	1.23943	-0.588262	2.4779	0.033035	0.14602	-3.56684
246117	Mcfd2	multiple coagulation factor deficiency 2	1.25176	0.400618	2.47682	0.0330956	0.146124	-3.56848
299858	Lrp1	LDL receptor related protein 1	1.25058	-0.264946	2.47619	0.0331312	0.146124	-3.56944
315686	Peak1	pseudopodium-enriched atypical kinase 1	1.23546	0.267267	2.47667	0.033104	0.146124	-3.56871
315745	Fem1b	fem-1 homolog B	1.1714	0.451699	2.47634	0.0331222	0.146124	-3.5692
117060	Ubr5	ubiquitin protein ligase E3 component n-recognin 5	1.58279	-0.311856	2.47575	0.0331559	0.146169	-3.57011
686098	Sorbs1	sorbin and SH3 domain containing 1	1.46462	0.0368646	2.47554	0.0331673	0.146169	-3.57042
81828	Zp2	zona pellucida glycoprotein 2	1.56363	-0.366549	2.47456	0.0332231	0.146174	-3.57192
306279	Arhgap22	Rho GTPase activating protein 22	1.19946	-0.125146	2.4737	0.0332714	0.146174	-3.57321
499663	Lce1f	late cornified envelope 1F	1.28897	-0.434595	2.47341	0.033288	0.146174	-3.57366
108351917	LOC108351917	uncharacterized LOC108351917	1.49611	0.282428	2.47409	0.0332495	0.146174	-3.57262
362031	Alg14	ALG14, UDP-N-acetylglucosaminyltransferase subunit	1.25192	0.640545	2.47307	0.0333071	0.146212	-3.57417
116472	Il17b	interleukin 17B	1.12218	0.0633214	2.46757	0.0336202	0.146899	-3.58253
64183	Pde4dip	phosphodiesterase 4D interacting protein	1.31224	0.755508	2.46562	0.0337317	0.147295	-3.58548
299613	Mex3d	mex-3 RNA binding family member D	1.18775	-0.602563	2.46488	0.0337745	0.147436	-3.58661
362002	Rnf115	ring finger protein 115	1.18799	0.30056	2.46386	0.0338332	0.1476	-3.58816
171458	Ipmk	inositol polyphosphate multikinase	1.15563	-0.450084	2.46141	0.0339742	0.148078	-3.59187
500040	Tes	testin LIM domain protein	1.3443	0.405802	2.46075	0.0340124	0.148198	-3.59288
24686	Prnp	prion protein	1.48144	0.012578	2.45966	0.0340754	0.148427	-3.59453
114488	Rbm3	RNA binding motif protein 3	1.1375	-0.608687	2.45921	0.0341016	0.148435	-3.59522
306380	Psd3	pleckstrin and Sec7 domain containing 3	1.17194	0.809833	2.45908	0.0341089	0.148435	-3.59541
308690	Ndn	necdin, MAGE family member	1.46639	0.234345	2.45827	0.0341564	0.148504	-3.59665
305880	Lrp10	LDL receptor related protein 10	1.25243	0.0854638	2.45533	0.0343274	0.149063	-3.6011
290564	Mettl6	methyltransferase like 6	1.33239	0.0122606	2.45349	0.0344351	0.149392	-3.6039
316452	Ccnyl1	cyclin Y-like 1	1.30039	0.919998	2.45258	0.034488	0.149542	-3.60527
29139	Dcn	decorin	1.58068	-0.155508	2.44821	0.0347452	0.150413	-3.6119
294560	Mcu	mitochondrial calcium uniporter	1.54018	-0.168145	2.4458	0.034888	0.150845	-3.61556
315311	Slc4a8	solute carrier family 4 member 8	1.30085	-0.534152	2.44511	0.034929	0.15093	-3.61661
362958	Micall1	MICAL-like 1	1.26083	0.438183	2.44463	0.0349573	0.150979	-3.61733
299008	Nubpl	nucleotide binding protein-like	1.23314	-0.735755	2.443	0.0350544	0.151183	-3.6198
499532	Tmem267	transmembrane protein 267	1.39553	-0.531772	2.44286	0.0350627	0.151183	-3.62001
64187	Arl1	ADP-ribosylation factor like GTPase 1	1.67681	0.0918763	2.44155	0.0351406	0.151247	-3.62199
314323	Flvcr2	feline leukemia virus subgroup C cellular receptor family, member 2	1.13278	0.786797	2.44219	0.0351025	0.151247	-3.62102
317425	Phf8	PHD finger protein 8	1.27427	0.233293	2.44164	0.0351353	0.151247	-3.62186
81636	Adcy2	adenylate cyclase 2	1.26616	-0.691602	2.43851	0.0353228	0.15177	-3.6266
59076	Grk6	G protein-coupled receptor kinase 6	1.2235	0.804716	2.43744	0.0353873	0.151976	-3.62823
310512	Nmd3	NMD3 ribosome export adaptor	1.87111	0.210915	2.43659	0.0354386	0.152104	-3.62952
25420	Cryab	crystallin, alpha B	1.42239	0.760288	2.43364	0.0356164	0.152541	-3.63398
114511	Emb	embigin	1.33194	-0.511621	2.43375	0.0356098	0.152541	-3.63382
287109	Kctd5	potassium channel tetramerization domain containing 5	1.42995	0.0345911	2.43323	0.0356413	0.152556	-3.63461
292097	Arv1	ARV1 homolog, fatty acid homeostasis modulator	1.29427	0.411932	2.43253	0.0356838	0.15266	-3.63567
59073	Lxn	latexin	2.00314	0.0565354	2.43126	0.0357608	0.15288	-3.63759
84023	Ptger4	prostaglandin E receptor 4	1.18614	0.151793	2.43065	0.0357978	0.152944	-3.63851
362246	Tp53inp2	tumor protein p53 inducible nuclear protein 2	1.15001	0.950203	2.43048	0.035808	0.152944	-3.63876
299857	Shmt2	serine hydroxymethyltransferase 2	1.6663	0.437397	2.42962	0.0358607	0.152973	-3.64008
306672	Tent4a	terminal nucleotidyltransferase 4A	1.14705	0.646422	2.42947	0.0358694	0.152973	-3.64029
287631	Wfikkn2	WAP, follistatin/kazal, immunoglobulin, kunitz and netrin domain containing 2	1.22963	-0.837447	2.42842	0.0359335	0.153134	-3.64188
304071	Sim2	SIM bHLH transcription factor 2	1.17709	-0.371859	2.428	0.0359591	0.153169	-3.64252
307494	Wdr55	WD repeat domain 55	1.2634	-0.553288	2.42774	0.0359753	0.153192	-3.64292
304469	Rilpl1	Rab interacting lysosomal protein-like 1	1.36901	-0.524551	2.42608	0.0360766	0.153484	-3.64542
442921	Prm3	protamine 3	1.18238	-0.424286	2.42581	0.0360935	0.153509	-3.64584
369016	Myadm	myeloid-associated differentiation marker	1.07974	1.04577	2.42553	0.0361106	0.153536	-3.64626
499430	Lrrc20	leucine rich repeat containing 20	1.31564	-0.0816063	2.4239	0.0362105	0.153821	-3.64873
83505	St3gal5	ST3 beta-galactoside alpha-2,3-sialyltransferase 5	1.17697	0.353678	2.42087	0.0363974	0.154242	-3.65331
338475	Nrep	neuronal regeneration related protein	1.27083	-0.660345	2.41928	0.0364958	0.154519	-3.65572
361568	Rras	RAS related	1.13417	0.930186	2.41827	0.0365588	0.154646	-3.65725
500266	Fam19a1	family with sequence similarity 19 member A1, C-C motif chemokine like	1.49596	-0.34569	2.41838	0.0365518	0.154646	-3.65708
474147	Mib2	mindbomb E3 ubiquitin protein ligase 2	1.22194	0.412506	2.41725	0.0366224	0.154765	-3.6588
360389	Zfp422	zinc finger protein 422	1.54186	-0.885402	2.41577	0.0367144	0.155025	-3.66104
288022	Ccdc50	coiled-coil domain containing 50	1.49961	-0.14617	2.41398	0.0368263	0.155451	-3.66375
24603	Npr1	natriuretic peptide receptor 1	1.11115	-0.220771	2.40995	0.037079	0.156143	-3.66984
266758	Sec11c	SEC11 homolog C, signal peptidase complex subunit	1.24131	0.200153	2.40649	0.0372973	0.156686	-3.67506
302946	Glis2	GLIS family zinc finger 2	1.39807	0.357761	2.40616	0.0373184	0.156729	-3.67557
171518	Cyp2c22	cytochrome P450, family 2, subfamily c, polypeptide 22	1.31518	-0.359154	2.40281	0.037531	0.157339	-3.68062
294279	Col11a2	collagen type XI alpha 2 chain	1.3317	0.221544	2.40352	0.037486	0.157339	-3.67956
305571	B3gnt2	UDP-GlcNAc:betaGal beta-1,3-N-acetylglucosaminyltransferase 2	1.10017	0.712568	2.40286	0.0375278	0.157339	-3.68055
29141	Gal	galanin and GMAP prepropeptide	1.10468	0.00902454	2.40225	0.0375669	0.157357	-3.68147
307652	Fam192a	family with sequence similarity 192, member A	1.27162	-0.498348	2.40197	0.0375848	0.157357	-3.6819
361709	Ap5b1	adaptor related protein complex 5 subunit beta 1	1.66689	-0.297788	2.40187	0.0375912	0.157357	-3.68205
286914	Vom2r27	vomeronasal 2 receptor, 27	1.43221	0.556936	2.40133	0.0376256	0.157454	-3.68287
79120	Arf4	ADP-ribosylation factor 4	1.49552	0.173343	2.40091	0.0376527	0.157521	-3.68351
290655	Crlf1	cytokine receptor-like factor 1	1.25072	-0.673825	2.40044	0.0376824	0.157558	-3.68421
64512	Fzd2	frizzled class receptor 2	1.31583	-0.339688	2.39939	0.0377497	0.157692	-3.6858
171059	Wfdc18	WAP four-disulfide core domain 18	1.4864	0.313108	2.39865	0.0377975	0.157798	-3.68692
595134	Akirin1	akirin 1	1.23535	-0.105446	2.39614	0.0379583	0.158098	-3.6907
362228	Naa20	N(alpha)-acetyltransferase 20, NatB catalytic subunit	1.06817	0.571352	2.39286	0.0381704	0.158742	-3.69566
686240	Naa16	N(alpha)-acetyltransferase 16, NatA auxiliary subunit	1.35653	-0.26253	2.39174	0.0382433	0.158771	-3.69735
81657	Gabbr1	gamma-aminobutyric acid type B receptor subunit 1	1.31505	0.824162	2.38935	0.0383987	0.159174	-3.70096
116744	Lpar1	lysophosphatidic acid receptor 1	1.0799	-0.980164	2.38879	0.0384352	0.159232	-3.70181
84028	Pnliprp1	pancreatic lipase-related protein 1	1.21502	-0.120207	2.38777	0.0385017	0.159413	-3.70335
24408	Grin1	glutamate ionotropic receptor NMDA type subunit 1	1.35507	-0.0637402	2.38452	0.0387148	0.159778	-3.70825
24211	Atp1a1	ATPase Na+/K+ transporting subunit alpha 1	1.11984	0.809841	2.38241	0.0388533	0.160115	-3.71143
305367	Arap2	ArfGAP with RhoGAP domain, ankyrin repeat and PH domain 2	1.16483	0.0524093	2.38249	0.0388479	0.160115	-3.7113
502663	Serf2	small EDRK-rich factor 2	1.07563	-0.433711	2.38208	0.0388751	0.160158	-3.71193
293067	Zfand6	zinc finger AN1-type containing 6	1.23446	-0.719617	2.37843	0.0391164	0.160775	-3.71743
689030	Tbpl1	TATA-box binding protein like 1	1.60477	-0.480534	2.37731	0.0391914	0.160942	-3.71913
362893	Arhgap9	Rho GTPase activating protein 9	1.87334	-0.138115	2.37658	0.0392398	0.161047	-3.72023
24817	Hnf1a	HNF1 homeobox A	1.22099	0.201538	2.37597	0.0392801	0.161165	-3.72114
306860	Gcnt2	glucosaminyl (N-acetyl) transferase 2	1.38736	0.989494	2.37189	0.0395531	0.162005	-3.7273
362606	Sync	syncoilin, intermediate filament protein	1.13431	1.06945	2.37167	0.0395678	0.162005	-3.72763
680308	Mthfd2	methylenetetrahydrofolate dehydrogenase (NADP+ dependent) 2, methenyltetrahydrofolate cyclohydrolase	1.33913	-0.531365	2.37136	0.0395884	0.162005	-3.72809
290635	Mvb12a	multivesicular body subunit 12A	1.09421	-0.312633	2.36975	0.0396969	0.162047	-3.73052
300236	Smagp	small cell adhesion glycoprotein	1.10864	0.863705	2.36985	0.03969	0.162047	-3.73037
305424	Fbxl5	F-box and leucine-rich repeat protein 5	1.46031	0.468044	2.36969	0.0397008	0.162047	-3.73061
311545	Hm13	histocompatibility minor 13	1.17618	-0.359477	2.3702	0.0396665	0.162047	-3.72984
316067	Xylb	xylulokinase	1.11511	-0.103655	2.36937	0.0397222	0.162081	-3.73109
171556	Prl5a1	prolactin family 5, subfamily a, member 1	1.23348	0.0929011	2.36655	0.0399128	0.162481	-3.73534
305258	Utp3	UTP3, small subunit processome component	1.22657	0.27273	2.36572	0.0399692	0.162617	-3.7366
192280	Ppp1r3b	protein phosphatase 1, regulatory subunit 3B	1.75104	-0.214495	2.36524	0.0400015	0.162701	-3.73731
170501	Galnt10	polypeptide N-acetylgalactosaminyltransferase 10	1.27467	0.104226	2.36474	0.0400358	0.162742	-3.73808
305604	Efemp1	EGF containing fibulin extracellular matrix protein 1	1.28102	0.566441	2.36478	0.0400329	0.162742	-3.73801
291556	Nars	asparaginyl-tRNA synthetase	1.5269	0.125957	2.36321	0.0401395	0.162933	-3.74037
298914	Itgb1bp1	integrin subunit beta 1 binding protein 1	1.17773	-0.696443	2.36336	0.0401294	0.162933	-3.74015
361091	Uggt2	UDP-glucose glycoprotein glucosyltransferase 2	1.171	0.357422	2.3635	0.0401202	0.162933	-3.73995
298602	Srarp	steroid receptor associated and regulated protein	1.27936	-0.263785	2.36153	0.0402544	0.163269	-3.74291
498911	Mt4	metallothionein 4	1.34951	0.589213	2.36131	0.0402689	0.163269	-3.74323
306417	Sh3rf1	SH3 domain containing ring finger 1	1.26543	0.44411	2.36003	0.0403568	0.163438	-3.74517
310467	Tiparp	TCDD-inducible poly(ADP-ribose) polymerase	1.16209	-0.860428	2.35894	0.0404313	0.163645	-3.74681
100366024	Prdm16	PR/SET domain 16	1.24638	-0.231096	2.35826	0.0404778	0.163786	-3.74783
116641	Lgals8	galectin 8	1.47137	-0.489774	2.35747	0.0405319	0.163927	-3.74901
498356	Shisa3	shisa family member 3	1.20075	0.265365	2.35741	0.0405359	0.163927	-3.7491
25743	Kcnj6	potassium voltage-gated channel subfamily J member 6	1.23924	-0.493056	2.35556	0.0406637	0.164256	-3.7519
29414	Akt3	AKT serine/threonine kinase 3	1.16123	-0.931863	2.35591	0.0406394	0.164256	-3.75137
363288	Kif1a	kinesin family member 1A	1.47529	0.269088	2.35407	0.0407665	0.164481	-3.75414
78971	Birc3	baculoviral IAP repeat-containing 3	1.59546	-0.0627381	2.35346	0.0408083	0.164571	-3.75505
680451	Nrbp2	nuclear receptor binding protein 2	1.56793	0.23307	2.35241	0.0408813	0.164802	-3.75664
60341	Camkk1	calcium/calmodulin-dependent protein kinase kinase 1	1.07258	-0.983724	2.35119	0.0409659	0.164954	-3.75847
304020	Filip1l	filamin A interacting protein 1-like	1.10099	0.950924	2.34492	0.0414035	0.16624	-3.7679
24440	Hbb	hemoglobin subunit beta	1.48748	-0.53252	2.3443	0.0414468	0.166367	-3.76883
308445	Cyp2s1	cytochrome P450, family 2, subfamily s, polypeptide 1	1.37573	-0.277365	2.3438	0.0414824	0.166415	-3.76959
296621	Phyhd1	phytanoyl-CoA dioxygenase domain containing 1	1.76841	-0.574627	2.3426	0.0415668	0.166611	-3.7714
60576	Treh	trehalase	1.32711	-0.396367	2.34207	0.0416037	0.166653	-3.77218
64369	Plpp1	phospholipid phosphatase 1	1.09641	0.163427	2.34219	0.0415954	0.166653	-3.77201
85265	Ajuba	ajuba LIM protein	1.312	0.647527	2.34048	0.0417162	0.166924	-3.77458
192206	Prok2	prokineticin 2	1.18849	-0.68586	2.33947	0.0417875	0.166993	-3.77609
361946	Supt20h	SPT20 homolog, SAGA complex component	1.22407	-0.597523	2.3394	0.0417927	0.166993	-3.7762
290771	Pdgfrl	platelet-derived growth factor receptor-like	1.42748	0.33112	2.33879	0.0418357	0.16707	-3.77712
498642	Rbpms	RNA binding protein, mRNA processing factor	1.53386	-0.220456	2.33839	0.0418642	0.167136	-3.77772
25617	Hspa5	heat shock protein family A member 5	1.37369	0.92358	2.3375	0.0419274	0.167162	-3.77906
116636	Eif4ebp1	eukaryotic translation initiation factor 4E binding protein 1	1.45366	0.033831	2.33714	0.0419527	0.167162	-3.77959
171574	Dnm3	dynamin 3	1.11592	-0.535	2.33712	0.041954	0.167162	-3.77962
500584	LOC500584	similar to casein kinase 1, gamma 3 isoform 2	1.58699	0.0761014	2.33721	0.0419478	0.167162	-3.77949
103694042	LOC103694042	uncharacterized LOC103694042	1.37023	-0.51514	2.3372	0.0419484	0.167162	-3.7795
287535	Vps53	VPS53 GARP complex subunit	1.43906	-0.117181	2.33485	0.0421156	0.167616	-3.78303
316313	Dst	dystonin	1.59314	0.541382	2.33297	0.0422502	0.168057	-3.78586
64303	Pfn1	profilin 1	1.47985	0.0499602	2.33228	0.0422998	0.168111	-3.7869
291964	Fhod1	formin homology 2 domain containing 1	1.38551	0.325325	2.33182	0.0423327	0.168176	-3.78759
308061	Pdcd6	programmed cell death 6	1.42638	-0.655985	2.33125	0.0423736	0.168215	-3.78845
294239	Ddah2	dimethylarginine dimethylaminohydrolase 2	1.2194	-0.111545	2.33002	0.0424618	0.168327	-3.79029
171119	Dscam	DS cell adhesion molecule	1.22389	0.342113	2.32925	0.0425175	0.168406	-3.79145
65048	Fat2	FAT atypical cadherin 2	1.37031	0.465718	2.32687	0.0426891	0.168551	-3.79503
360631	Mlx	MLX, MAX dimerization protein	1.57746	0.565057	2.32437	0.0428699	0.168942	-3.79877
500348	Bcl2l14	BCL2 like 14	1.37494	-0.438562	2.32184	0.0430539	0.169291	-3.80257
296474	Helz2	helicase with zinc finger 2	1.27635	0.726693	2.3215	0.0430788	0.169294	-3.80308
499677	Lix1l	limb and CNS expressed 1 like	1.37357	-0.876936	2.32161	0.0430707	0.169294	-3.80291
102553885	LOC102553885	uncharacterized LOC102553885	1.25501	0.105198	2.32	0.0431885	0.169394	-3.80533
257648	Cacna1b	calcium voltage-gated channel subunit alpha1 B	1.57346	-0.0336976	2.31777	0.0433517	0.169797	-3.80868
25301	Cebpg	CCAAT/enhancer binding protein gamma	1.28371	-0.128207	2.31577	0.0434989	0.170221	-3.81168
317322	Gpc4	glypican 4	1.0609	0.675666	2.31564	0.0435084	0.170221	-3.81187
29260	Tlr4	toll-like receptor 4	1.22133	-0.535612	2.31157	0.0438091	0.170975	-3.81797
310348	Larp1b	La ribonucleoprotein domain family, member 1B	1.17988	0.459185	2.31109	0.0438449	0.171015	-3.8187
338474	Tmem132a	transmembrane protein 132A	1.423	-0.527439	2.30979	0.043941	0.171294	-3.82064
312656	March8	membrane associated ring-CH-type finger 8	1.54893	-0.338903	2.30938	0.0439714	0.171341	-3.82125
685076	Pgm2l1	phosphoglucomutase 2-like 1	1.16683	-0.0713111	2.30796	0.0440778	0.17159	-3.82339
690137	Tmem120b	transmembrane protein 120B	1.27162	-0.197099	2.30758	0.0441058	0.171604	-3.82395
24629	Pdgfrb	platelet derived growth factor receptor beta	1.2495	0.0897349	2.30729	0.0441276	0.171641	-3.82439
313644	Rap1gap	Rap1 GTPase-activating protein	1.24285	-0.949274	2.30704	0.0441457	0.171664	-3.82475
294709	Trappc13	trafficking protein particle complex 13	1.29848	-0.179775	2.30458	0.0443303	0.172113	-3.82845
315795	Cgnl1	cingulin-like 1	1.35707	0.245978	2.30215	0.044513	0.172615	-3.83209
288710	Rnf10	ring finger protein 10	1.4013	-0.677206	2.30022	0.0446586	0.172799	-3.83498
102556224	LOC102556224	uncharacterized LOC102556224	1.11289	-0.134197	2.29954	0.0447097	0.172949	-3.83599
360719	Hgd	homogentisate 1, 2-dioxygenase	1.11695	-1.02013	2.29901	0.0447497	0.173056	-3.83679
293344	Arfip2	ADP-ribosylation factor interacting protein 2	1.52584	0.0628353	2.29801	0.0448254	0.173206	-3.83828
689500	Mcts2	malignant T cell amplified sequence 2	1.52326	-0.534244	2.29808	0.0448204	0.173206	-3.83818
291802	Zfp136	zinc finger protein 136	1.43792	-0.124222	2.2962	0.0449631	0.173547	-3.841
29599	Atp2b3	ATPase plasma membrane Ca2+ transporting 3	1.43369	-0.083844	2.2935	0.0451685	0.173744	-3.84503
84018	Synj2	synaptojanin 2	1.37382	0.165104	2.29386	0.0451411	0.173744	-3.84449
286920	Asic3	acid sensing ion channel subunit 3	1.42391	-0.490809	2.29441	0.0450995	0.173744	-3.84367
289307	Tfb2m	transcription factor B2, mitochondrial	1.37834	0.671822	2.29391	0.0451374	0.173744	-3.84442
304077	Dop1b	DOP1 leucine zipper like protein B	1.26836	0.0364839	2.29377	0.0451483	0.173744	-3.84463
64367	Ppib	peptidylprolyl isomerase B	1.16181	0.342545	2.29165	0.0453102	0.173916	-3.8478
310588	Tchh	trichohyalin	1.07485	-0.473934	2.29195	0.0452871	0.173916	-3.84735
363221	Cnot11	CCR4-NOT transcription complex, subunit 11	1.16849	-0.373443	2.29119	0.0453455	0.173973	-3.84849
64562	Prkab2	protein kinase AMP-activated non-catalytic subunit beta 2	1.35926	0.0496851	2.28875	0.0455329	0.174169	-3.85214
293632	Ifitm10	interferon induced transmembrane protein 10	1.20804	-0.306104	2.28912	0.0455042	0.174169	-3.85158
300811	Bnip2	BCL2 interacting protein 2	1.24149	0.580973	2.28989	0.0454454	0.174169	-3.85044
302983	Mapk8ip3	mitogen-activated protein kinase 8 interacting protein 3	1.41253	-0.0156694	2.28879	0.0455298	0.174169	-3.85208
498910	Arl2bp	ADP-ribosylation factor like GTPase 2 binding protein	1.3335	0.643173	2.28937	0.0454851	0.174169	-3.85121
81716	Ggcx	gamma-glutamyl carboxylase	1.19653	0.635183	2.28655	0.0457028	0.174604	-3.85543
295305	Acp6	acid phosphatase 6, lysophosphatidic	1.46737	0.0761203	2.28647	0.0457086	0.174604	-3.85554
362715	Dtnb	dystrobrevin, beta	1.34289	-0.169992	2.28581	0.0457595	0.174751	-3.85653
315137	Apobec3	apolipoprotein B mRNA editing enzyme catalytic subunit 3	1.19134	-0.049432	2.28481	0.0458374	0.174864	-3.85803
316351	Npas2	neuronal PAS domain protein 2	1.18481	0.324643	2.28491	0.0458298	0.174864	-3.85789
290555	Spcs1	signal peptidase complex subunit 1	1.50785	-0.402749	2.28458	0.0458553	0.174879	-3.85838
29676	Psmb3	proteasome subunit beta 3	1.37002	-0.284168	2.28318	0.0459637	0.175049	-3.86047
192246	Phf5a	PHD finger protein 5A	1.29853	-0.51134	2.28056	0.0461675	0.175591	-3.86438
292750	Plekhg2	pleckstrin homology and RhoGEF domain containing G2	1.6049	0.249738	2.27818	0.0463536	0.175921	-3.86793
295270	Sf3b4	splicing factor 3b, subunit 4	1.11019	-0.680124	2.27506	0.0465988	0.176423	-3.8726
684800	Smap1	small ArfGAP 1	1.21269	-0.684023	2.27513	0.0465928	0.176423	-3.87248
681167	Samt3	spermatogenesis associated multipass transmembrane protein 3	1.48864	-0.269684	2.27467	0.0466298	0.176445	-3.87318
100912083	Dancr	differentiation antagonizing non-protein coding RNA	1.21017	-0.155474	2.274	0.0466822	0.176454	-3.87418
308581	Ccdc155	coiled-coil domain containing 155	1.0604	0.350053	2.27378	0.0466995	0.17646	-3.87451
501925	Slc2a9	solute carrier family 2 member 9	1.08418	-0.384659	2.27328	0.0467387	0.176525	-3.87525
85424	Elf1	E74 like ETS transcription factor 1	1.20799	0.694266	2.27226	0.0468197	0.176642	-3.87678
293181	Galnt18	polypeptide N-acetylgalactosaminyltransferase 18	1.71851	-0.126444	2.2721	0.0468323	0.176642	-3.87702
360779	Lrch4	leucine rich repeats and calponin homology domain containing 4	1.2502	0.440429	2.27087	0.04693	0.176726	-3.87886
291861	Nlrc5	NLR family, CARD domain containing 5	1.50854	-0.16091	2.26971	0.0470218	0.176836	-3.88058
298683	Vwa1	von Willebrand factor A domain containing 1	1.25747	-0.048535	2.26521	0.0473801	0.177582	-3.88729
361213	Sptlc1	serine palmitoyltransferase, long chain base subunit 1	1.17353	-0.64181	2.26538	0.0473666	0.177582	-3.88704
499893	Ap5s1	adaptor related protein complex 5 subunit sigma 1	1.17035	0.0499273	2.265	0.0473975	0.177582	-3.88761
25155	Syk	spleen associated tyrosine kinase	1.36085	0.0490333	2.26285	0.0475695	0.177848	-3.89081
29558	Fcgrt	Fc fragment of IgG receptor and transporter	1.02225	-0.203401	2.26336	0.047529	0.177848	-3.89006
302915	Pmm2	phosphomannomutase 2	1.30048	0.640506	2.26321	0.047541	0.177848	-3.89028
686143	LOC686143	similar to keratinocytes proline-rich protein	1.44418	0.205857	2.26292	0.0475643	0.177848	-3.89072
192362	Lamc2	laminin subunit gamma 2	1.37536	0.908723	2.26268	0.0475833	0.177852	-3.89107
292264	Myct1	myc target 1	1.22895	-0.075687	2.26108	0.0477122	0.178192	-3.89346
60394	Olig1	oligodendrocyte transcription factor 1	1.47081	-0.108303	2.2571	0.0480334	0.179012	-3.89938
311529	Ninl	ninein-like	1.2918	-0.350558	2.25472	0.0482273	0.179515	-3.90294
292069	Ctu2	cytosolic thiouridylase subunit 2	1.32088	-0.0330744	2.25433	0.0482587	0.179566	-3.90351
293117	Ankrd42	ankyrin repeat domain 42	0.993204	-0.795201	2.25349	0.0483276	0.179679	-3.90477
362223	Snrpb2	small nuclear ribonucleoprotein polypeptide B2	1.14771	-0.815603	2.25378	0.0483038	0.179679	-3.90434
501185	Mab21l4	mab-21 like 4	1.39869	0.196924	2.25137	0.0485005	0.180132	-3.90793
170635	Dhrs9	dehydrogenase/reductase 9	1.1431	0.748725	2.24929	0.0486713	0.180466	-3.91103
310663	Tnfaip8l2	TNF alpha induced protein 8 like 2	1.52511	-0.0675061	2.24956	0.048649	0.180466	-3.91062
100360180	Pgd	phosphogluconate dehydrogenase	1.48156	-0.634696	2.24788	0.0487868	0.180671	-3.91312
24794	Serpina3c	serine (or cysteine) proteinase inhibitor, clade A, member 3C	1.78022	0.0241842	2.2453	0.0489994	0.181362	-3.91696
64826	Foxq1	forkhead box Q1	1.14944	-0.515894	2.24494	0.0490297	0.181427	-3.9175
684322	Kcmf1	potassium channel modulatory factor 1	1.32695	-0.273896	2.24346	0.0491521	0.181784	-3.9197
500689	Ttc9	tetratricopeptide repeat domain 9	1.20768	0.614595	2.24271	0.0492144	0.181919	-3.92082
108348214	NEWGENE_1565644	leucine zipper down-regulated in cancer 1	1.49033	0.110916	2.24058	0.0493909	0.18238	-3.92398
680875	LOC680875	similar to dystonin isoform 1	1.35848	-0.211557	2.2396	0.0494733	0.182636	-3.92544
54300	Slc12a3	solute carrier family 12 member 3	1.37958	0.414945	2.23925	0.0495026	0.182691	-3.92597
170844	Taf2	TATA-box binding protein associated factor 2	1.04833	-0.514267	2.23602	0.0497722	0.18345	-3.93076
25668	Cd38	CD38 molecule	1.50812	0.169689	2.23499	0.0498594	0.183509	-3.9323
170816	Olr59	olfactory receptor 59	1.3426	-0.106105	2.23459	0.0498926	0.183509	-3.93289
116659	Dync1i2	dynein cytoplasmic 1 intermediate chain 2	1.12997	-0.632334	2.23412	0.0499325	0.183512	-3.93359
114634	Six1	SIX homeobox 1	1.10198	-1.02809	2.23351	0.0499833	0.183603	-3.93449
312382	Abcg2	ATP binding cassette subfamily G member 2	1.30486	0.299535	2.23331	0.0500007	0.183619	-3.93479
54268	Mapk4	mitogen-activated protein kinase 4	1.36697	-0.0349787	2.23198	0.0501124	0.183747	-3.93676
84420	Adcy7	adenylate cyclase 7	1.14448	-0.0689806	2.23014	0.0502681	0.184168	-3.93949
114023	Copb1	coatomer protein complex, subunit beta 1	1.58281	-0.486406	2.22846	0.050411	0.184515	-3.942
192218	Kat5	lysine acetyltransferase 5	1.42507	0.411869	2.22711	0.0505261	0.184515	-3.94401
315447	Chordc1	cysteine and histidine rich domain containing 1	1.00161	-0.965601	2.22832	0.0504228	0.184515	-3.9422
362185	Mpped2	metallophosphoesterase domain containing 2	1.39434	0.54259	2.22702	0.0505334	0.184515	-3.94413
25043	Eln	elastin	1.5463	-0.093732	2.22671	0.0505603	0.184559	-3.9446
361233	Ssr1	signal sequence receptor subunit 1	1.12454	0.564539	2.22641	0.0505851	0.18456	-3.94503
29524	Limk2	LIM domain kinase 2	1.08513	-0.300717	2.22079	0.0510666	0.185704	-3.95338
171145	Eif2b3	eukaryotic translation initiation factor 2B subunit gamma	1.32172	0.20087	2.22035	0.0511049	0.185782	-3.95404
171337	Rap1b	RAP1B, member of RAS oncogene family	1.24443	-0.0990265	2.22019	0.0511181	0.185782	-3.95427
361300	Mocos	molybdenum cofactor sulfurase	1.08101	-0.75156	2.2162	0.0514628	0.186601	-3.96019
81509	Bdkrb1	bradykinin receptor B1	1.35674	-0.22212	2.21491	0.0515753	0.186816	-3.96211
79423	Stmn4	stathmin 4	0.999021	0.115389	2.21314	0.0517291	0.18715	-3.96473
690599	Mxra7	matrix remodeling associated 7	1.29107	0.0542755	2.21278	0.0517605	0.18715	-3.96526
102551966	LOC102551966	uncharacterized LOC102551966	1.12805	-0.649369	2.21303	0.0517386	0.18715	-3.96489
363447	Tspan7	tetraspanin 7	0.992405	-0.983305	2.2117	0.0518544	0.187441	-3.96686
368178	Hoxc9	homeobox C9	1.27575	-0.232377	2.21069	0.0519428	0.187664	-3.96836
362339	Creb3l2	cAMP responsive element binding protein 3-like 2	1.08743	0.177311	2.20986	0.0520155	0.187878	-3.96959
25402	Casp3	caspase 3	1.58746	-0.308336	2.20902	0.0520895	0.188049	-3.97084
498886	RGD1562987	similar to cDNA sequence BC031181	1.05849	-0.213279	2.20871	0.0521162	0.188062	-3.97129
103692066	LOC103692066	sterile alpha motif domain-containing protein 9-like	1.42301	0.457513	2.20859	0.0521266	0.188062	-3.97147
287357	Wnt9a	Wnt family member 9A	1.16223	0.259876	2.20763	0.0522113	0.188295	-3.9729
364834	Polr2d	RNA polymerase II subunit D	1.28331	-0.107076	2.20464	0.0524744	0.189069	-3.97732
116669	Vwf	von Willebrand factor	1.21154	0.0804244	2.20387	0.0525431	0.189249	-3.97847
309097	Adgra1	adhesion G protein-coupled receptor A1	1.4046	-0.414863	2.20357	0.0525694	0.189296	-3.97891
362261	Lpin3	lipin 3	1.4951	-0.368197	2.20192	0.0527154	0.189578	-3.98135
361509	Ube2m	ubiquitin-conjugating enzyme E2M	1.31275	-0.574312	2.20101	0.052796	0.189793	-3.98269
81663	Gna12	G protein subunit alpha 12	1.3641	0.195003	2.20007	0.05288	0.189831	-3.98409
171049	Folr1	folate receptor 1	1.10516	-0.127805	2.2002	0.0528683	0.189831	-3.9839
366366	Igfbpl1	insulin-like growth factor binding protein-like 1	1.32759	-0.516745	2.20029	0.0528606	0.189831	-3.98377
259274	Nmt1	N-myristoyltransferase 1	1.10161	0.89068	2.19959	0.0529225	0.189886	-3.9848
304692	Serpinb12	serpin family B member 12	1.2832	-0.125259	2.19643	0.0532043	0.190416	-3.98947
298732	Glis1	GLIS family zinc finger 1	1.28058	0.447905	2.19423	0.0534018	0.190924	-3.99273
26296	Tfec	transcription factor EC	1.18753	0.567078	2.194	0.0534225	0.190933	-3.99307
104845260	Lnc215	long non-coding RNA 215	1.40805	0.0874313	2.1921	0.0535933	0.191268	-3.99587
301674	Fbxo11	F-box protein 11	1.11247	-1.03664	2.19071	0.0537192	0.191524	-3.99794
313417	Wdr78	WD repeat domain 78	1.44396	0.965524	2.18957	0.0538219	0.191744	-3.99962
310540	Gask1b	golgi associated kinase 1B	1.20054	0.35354	2.18938	0.0538397	0.191759	-3.99991
59086	Tgfb1	transforming growth factor, beta 1	1.13247	0.315991	2.18915	0.05386	0.191783	-4.00024
170667	Atp6v0c	ATPase H+ transporting V0 subunit C	1.07273	0.265535	2.18761	0.0539998	0.192215	-4.00252
363009	Uhrf1bp1l	UHRF1 binding protein 1-like	1.36427	0.810163	2.18504	0.0542335	0.192819	-4.00631
304555	Hps4	HPS4, biogenesis of lysosomal organelles complex 3 subunit 2	1.36236	0.057149	2.1826	0.0544569	0.193516	-4.00992
24460	Hoxc8	homeobox C8	1.27476	-0.710739	2.18208	0.0545039	0.193585	-4.01068
24800	Sts	steroid sulfatase	1.30573	-0.0640673	2.18141	0.0545653	0.193705	-4.01167
79428	Luzp1	leucine zipper protein 1	1.11931	0.797588	2.17996	0.0546989	0.193792	-4.01382
296350	Serinc3	serine incorporator 3	1.23755	-0.052388	2.1803	0.0546676	0.193792	-4.01331
301574	Cab39	calcium binding protein 39	1.43315	-0.469835	2.17946	0.0547445	0.193803	-4.01455
83684	Tpbg	trophoblast glycoprotein	1.07201	-0.657682	2.17768	0.0549086	0.194238	-4.01718
300443	Plppr2	phospholipid phosphatase related 2	1.28536	-0.048107	2.17607	0.055058	0.194522	-4.01956
316395	Hecw2	HECT, C2 and WW domain containing E3 ubiquitin protein ligase 2	1.5707	-0.0670661	2.17562	0.0550993	0.19457	-4.02022
26955	Afdn	afadin, adherens junction formation factor	1.26101	0.392924	2.17462	0.0551923	0.194751	-4.0217
65161	Litaf	lipopolysaccharide-induced TNF factor	0.966323	0.869746	2.17463	0.0551913	0.194751	-4.02169
25183	Gdi1	GDP dissociation inhibitor 1	1.6051	0.248123	2.17404	0.055246	0.194892	-4.02256
366262	Rbm38	RNA binding motif protein 38	1.23985	0.0511771	2.17344	0.055301	0.195037	-4.02343
362282	Pck1	phosphoenolpyruvate carboxykinase 1	1.66544	-0.160591	2.17306	0.0553367	0.195114	-4.024
309686	Pofut2	protein O-fucosyltransferase 2	1.41328	0.751292	2.17138	0.0554926	0.195468	-4.02647
60350	Cd14	CD14 molecule	1.07216	1.08828	2.17092	0.0555358	0.195544	-4.02715
246757	Klhl17	kelch-like family member 17	1.11675	-0.529582	2.17022	0.055601	0.195703	-4.02818
102547324	LOC102547324	eukaryotic translation elongation factor 1 epsilon-1-like	1.25152	0.309055	2.16622	0.055976	0.196531	-4.03408
65135	Dpys	dihydropyrimidinase	1.08196	-0.606469	2.16602	0.0559947	0.196547	-4.03437
498295	Smyd3	SET and MYND domain containing 3	1.29337	0.224658	2.16517	0.0560748	0.196731	-4.03562
29705	Gabra1	gamma-aminobutyric acid type A receptor alpha1 subunit	1.39205	0.228314	2.1645	0.0561382	0.196805	-4.03662
117263	Psmc1	proteasome 26S subunit, ATPase 1	1.43616	-0.849576	2.16414	0.0561716	0.196805	-4.03714
362285	Col9a3	collagen type IX alpha 3 chain	1.34515	0.124297	2.16405	0.05618	0.196805	-4.03727
25506	P4hb	prolyl 4-hydroxylase subunit beta	1.4624	0.314089	2.1639	0.0561942	0.196805	-4.03749
363136	Tmem115	transmembrane protein 115	1.32339	0.287345	2.16296	0.0562837	0.197021	-4.03889
680532	Sem1	SEM1, 26S proteasome complex subunit	1.29199	-0.105975	2.16268	0.0563102	0.197045	-4.0393
64055	Guca2b	guanylate cyclase activator 2B	1.64191	-0.328939	2.15857	0.0566996	0.198063	-4.04534
117557	Tpm3	tropomyosin 3	1.04446	0.28433	2.15818	0.0567364	0.198063	-4.04591
100188932	Ost4	oligosaccharyltransferase complex subunit 4, non-catalytic	1.21157	0.731392	2.15662	0.0568859	0.19829	-4.04822
29170	Aqp6	aquaporin 6	1.50104	-0.0275487	2.15414	0.0571223	0.198797	-4.05186
293739	Ms4a10	membrane spanning 4-domains A10	1.17106	-0.101111	2.15413	0.0571233	0.198797	-4.05187
170824	Steap3	STEAP3 metalloreductase	1.10216	-0.639766	2.15353	0.0571808	0.198874	-4.05275
25426	Cyp1b1	cytochrome P450, family 1, subfamily b, polypeptide 1	0.985118	-1.14025	2.15281	0.0572508	0.199068	-4.05382
102555109	LOC102555109	uncharacterized LOC102555109	0.966643	-0.782459	2.15068	0.0574555	0.199435	-4.05695
59314	Camk2n2	calcium/calmodulin-dependent protein kinase II inhibitor 2	1.42589	0.289938	2.1502	0.0575014	0.199446	-4.05765
102546740	LOC102546740	uncharacterized LOC102546740	1.05322	-0.364802	2.15012	0.0575096	0.199446	-4.05778
140610	Brinp1	BMP/retinoic acid inducible neural specific 1	1.61034	0.143695	2.14883	0.057634	0.199661	-4.05967
287287	Il4	interleukin 4	1.04802	0.327461	2.14663	0.0578465	0.20006	-4.0629
24391	Gh1	growth hormone 1	1.53725	0.0156484	2.14553	0.0579541	0.200251	-4.06452
29483	Slc1a3	solute carrier family 1 member 3	0.942426	-0.0984112	2.14544	0.0579629	0.200251	-4.06466
29557	Myh7	myosin heavy chain 7	1.38925	0.584828	2.14569	0.0579382	0.200251	-4.06428
316369	Nck2	NCK adaptor protein 2	1.1846	-0.147456	2.14531	0.0579754	0.200251	-4.06485
293938	Bloc1s2	biogenesis of lysosomal organelles complex-1, subunit 2	1.32811	2.46152e-05	2.14507	0.0579988	0.200269	-4.0652
298845	Emilin1	elastin microfibril interfacer 1	1.50634	-0.442741	2.14399	0.058104	0.200398	-4.06679
360920	Mob1b	MOB kinase activator 1B	1.34821	0.189741	2.14371	0.0581312	0.200398	-4.0672
171144	Slco4a1	solute carrier organic anion transporter family, member 4a1	1.40412	-0.486249	2.14311	0.0581892	0.200498	-4.06807
94339	Mmp23	matrix metallopeptidase 23	1.34262	-0.701249	2.14281	0.0582188	0.20052	-4.06852
315120	Card10	caspase recruitment domain family, member 10	1.16672	-0.452145	2.14166	0.0583314	0.200693	-4.07021
80843	Sec61a1	Sec61 translocon alpha 1 subunit	1.19068	0.417379	2.13771	0.0587181	0.201826	-4.07599
498967	RGD1559896	similar to RIKEN cDNA 2310022B05	0.982105	0.786528	2.13714	0.0587744	0.20192	-4.07683
314472	Tmem179	transmembrane protein 179	1.43652	0.0637426	2.13628	0.0588597	0.202115	-4.0781
301634	Fam174a	family with sequence similarity 174, member A	1.00166	0.140127	2.13483	0.0590023	0.202407	-4.08022
298545	Cnksr1	connector enhancer of kinase suppressor of Ras 1	1.18589	-0.233628	2.13424	0.0590606	0.202508	-4.08108
288480	Aimp2	aminoacyl tRNA synthetase complex-interacting multifunctional protein 2	1.1186	0.387661	2.13287	0.0591969	0.202629	-4.0831
303499	Sp2	Sp2 transcription factor	1.17685	0.0165305	2.13289	0.0591943	0.202629	-4.08306
315936	Zbtb38	zinc finger and BTB domain containing 38	1.19607	-0.742874	2.13301	0.0591831	0.202629	-4.0829
312849	Med21	mediator complex subunit 21	1.37572	0.109097	2.13145	0.059338	0.202879	-4.08519
365381	Stk32c	serine/threonine kinase 32C	1.47936	-0.56125	2.13141	0.059342	0.202879	-4.08525
502084	Rwdd4	RWD domain containing 4	1.13905	0.630409	2.13052	0.0594303	0.203082	-4.08655
301100	Ooep	oocyte expressed protein	1.30585	-0.248291	2.13036	0.0594464	0.203088	-4.08678
60430	Mcl1	MCL1, BCL2 family apoptosis regulator	1.22481	0.242876	2.12971	0.0595109	0.20321	-4.08773
78981	Tas2r107	taste receptor, type 2, member 107	1.07353	-0.280526	2.12646	0.0598354	0.20368	-4.09249
302248	Nid2	nidogen 2	1.23881	-0.639579	2.12628	0.0598541	0.20368	-4.09276
306516	Gtf2e2	general transcription factor IIE subunit 2	1.09122	-0.773875	2.12645	0.0598369	0.20368	-4.09251
362171	Prr5l	proline rich 5 like	1.13409	0.43213	2.12697	0.0597851	0.20368	-4.09175
688765	LOC688765	hypothetical protein LOC688765	1.17576	0.298794	2.12712	0.0597699	0.20368	-4.09153
100911652	Thumpd3-as1	THUMPD3 antisense RNA 1	1.00453	0.261324	2.12472	0.0600102	0.204072	-4.09504
297522	Sec13	SEC13 homolog, nuclear pore and COPII coat complex component	1.34962	-0.3945	2.12391	0.0600919	0.204202	-4.09623
687565	Denr	density regulated reinitiation and release factor	1.23934	-0.0537137	2.11974	0.0605124	0.205433	-4.10233
29675	Psmb2	proteasome subunit beta 2	1.0444	-0.434269	2.11754	0.0607357	0.205843	-4.10555
252889	Tmed7	transmembrane p24 trafficking protein 7	1.00328	0.452701	2.11704	0.060787	0.205862	-4.10629
309373	Ubtd1	ubiquitin domain containing 1	1.42876	0.252049	2.11698	0.0607931	0.205862	-4.10637
314221	Six6	SIX homeobox 6	1.29758	-0.0649944	2.11691	0.0607998	0.205862	-4.10647
29165	Gzmk	granzyme K	1.54923	-0.124142	2.11668	0.0608235	0.205892	-4.10681
293844	Haus7	HAUS augmin-like complex, subunit 7	1.34629	-0.201564	2.11591	0.0609025	0.20611	-4.10795
100361571	Krtap1-1	keratin associated protein 1-1	1.13089	-0.530213	2.11374	0.0611242	0.206661	-4.11112
362553	Tctex1d1	Tctex1 domain containing 1	1.13366	-0.0430058	2.11303	0.0611966	0.206857	-4.11216
29231	Ciao1	cytosolic iron-sulfur assembly component 1	1.08051	0.234291	2.11253	0.0612478	0.20698	-4.11289
24547	Mbp	myelin basic protein	1.12292	-0.155317	2.11146	0.0613578	0.207103	-4.11445
25206	Gucy1b2	guanylate cyclase 1 soluble subunit beta 2	1.56119	-0.368011	2.11172	0.0613307	0.207103	-4.11407
29884	Bok	BCL2 family apoptosis regulator BOK	1.50274	0.36895	2.10808	0.0617047	0.207884	-4.11938
312790	Gprc5a	G protein-coupled receptor, class C, group 5, member A	1.0102	0.951145	2.10691	0.0618257	0.20822	-4.12109
313493	Rgp1	RGP1 homolog, RAB6A GEF complex partner 1	1.21542	-0.282808	2.10587	0.0619341	0.208348	-4.12262
500956	LOC500956	hypothetical protein LOC500956	0.961631	0.427791	2.10614	0.0619057	0.208348	-4.12222
315430	Amotl1	angiomotin-like 1	1.22814	0.145735	2.10532	0.0619905	0.208438	-4.12342
24714	Reg1a	regenerating family member 1 alpha	1.50788	-0.242569	2.10471	0.0620544	0.208533	-4.12432
315912	Tbc1d8b	TBC1 domain family member 8B	1.05782	-0.760209	2.10205	0.0623308	0.20911	-4.1282
102555762	LOC102555762	uncharacterized LOC102555762	1.1013	0.288748	2.10156	0.0623815	0.209153	-4.12891
293922	Aff2	AF4/FMR2 family, member 2	1.1166	-0.282008	2.10097	0.0624427	0.209258	-4.12976
289026	Sox13	SRY box 13	1.57966	-0.214254	2.09967	0.0625791	0.209566	-4.13167
294283	Rgl2	ral guanine nucleotide dissociation stimulator-like 2	1.09538	-0.435941	2.0993	0.0626173	0.209594	-4.1322
266772	Klhl12	kelch-like family member 12	1.05598	-0.00113039	2.0991	0.0626387	0.209615	-4.1325
29709	Gabrg2	gamma-aminobutyric acid type A receptor gamma 2 subunit	1.30335	-0.187006	2.09774	0.0627807	0.209976	-4.13448
24791	Sparc	secreted protein acidic and cysteine rich	1.10614	0.559132	2.09405	0.0631695	0.21084	-4.13986
360445	Crisp2	cysteine-rich secretory protein 2	1.5514	-0.291047	2.09329	0.0632496	0.211007	-4.14097
689197	Kin	Kin17 DNA and RNA binding protein	1.30445	0.350567	2.09213	0.0633722	0.211046	-4.14266
100910237	LOC100910237	uncharacterized LOC100910237	1.29419	0.383227	2.09034	0.063562	0.211297	-4.14527
252898	Acox2	acyl-CoA oxidase 2	1.36284	-0.0461714	2.08961	0.0636403	0.211508	-4.14634
117100	Slc6a7	solute carrier family 6 member 7	1.04703	-0.399302	2.08812	0.0637984	0.211983	-4.1485
311279	Arl14ep	ADP-ribosylation factor like GTPase 14 effector protein	1.39533	-0.0341352	2.08724	0.0638928	0.212146	-4.14979
363062	Dixdc1	DIX domain containing 1	1.04503	-0.67903	2.08653	0.0639681	0.212346	-4.15082
24324	Edn2	endothelin 2	1.26982	-0.452257	2.08629	0.0639938	0.212382	-4.15117
25661	Fn1	fibronectin 1	1.13341	-0.216733	2.08456	0.0641791	0.212896	-4.15369
314648	Ncln	nicalin	0.999453	-1.10739	2.0842	0.0642171	0.212972	-4.15421
360302	Ptprk	protein tyrosine phosphatase, receptor type, K	1.09061	-0.871275	2.08362	0.0642793	0.21301	-4.15505
64680	Crhr2	corticotropin releasing hormone receptor 2	1.14116	0.734139	2.07954	0.0647192	0.213881	-4.161
59315	Nxph3	neurexophilin 3	1.13193	0.611389	2.07764	0.064924	0.214306	-4.16375
83722	Plk2	polo-like kinase 2	1.01506	0.46375	2.07691	0.0650032	0.214366	-4.16481
25485	Myo1d	myosin ID	0.921706	0.818256	2.07562	0.0651439	0.214528	-4.16669
64634	Sh3bp4	SH3-domain binding protein 4	0.962071	0.376855	2.0749	0.0652223	0.214546	-4.16774
361273	Sec61a2	Sec61 translocon alpha 2 subunit	0.996648	-0.600985	2.07498	0.0652134	0.214546	-4.16762
108351027	LOC108351027	uncharacterized LOC108351027	1.11485	0.406996	2.0752	0.0651891	0.214546	-4.1673
360491	Traf7	TNF receptor associated factor 7	1.57831	0.610642	2.07376	0.0653465	0.214868	-4.1694
100911664	LOC100911664	uncharacterized LOC100911664	1.18743	-0.79654	2.07369	0.0653542	0.214868	-4.1695
308496	Nfkbid	NFKB inhibitor delta	1.19691	-0.194795	2.0713	0.0656144	0.215623	-4.17296
361238	Pxdc1	PX domain containing 1	1.01784	0.840068	2.0711	0.0656362	0.215644	-4.17325
81778	S100a10	S100 calcium binding protein A10	1.22007	0.240984	2.07066	0.065685	0.215666	-4.1739
361686	Osbpl5	oxysterol binding protein-like 5	1.2037	0.0692852	2.07062	0.0656889	0.215666	-4.17395
680252	Dmwd	DM1 locus, WD repeat containing	1.00558	0.415672	2.07077	0.0656726	0.215666	-4.17374
499431	Col13a1	collagen type XIII alpha 1 chain	1.41027	0.391284	2.06841	0.0659314	0.216109	-4.17716
25056	Rbp1	retinol binding protein 1	1.55903	0.0697308	2.0671	0.0660756	0.21633	-4.17906
100359595	Tbc1d32	TBC1 domain family, member 32	1.23673	-0.383564	2.06692	0.0660954	0.216344	-4.17932
303601	Cyb561	cytochrome b-561	1.30095	-0.118329	2.06613	0.0661829	0.21653	-4.18047
116635	Scg3	secretogranin III	1.30097	0.572291	2.06568	0.0662329	0.216612	-4.18113
84591	Pick1	protein interacting with PRKCA 1	1.06624	0.0569159	2.06478	0.0663318	0.216815	-4.18243
85248	Kif3c	kinesin family member 3C	1.26855	0.232609	2.06358	0.0664652	0.21696	-4.18418
292078	Spata33	spermatogenesis associated 33	1.14683	-0.129185	2.06281	0.0665504	0.217056	-4.18529
24695	Pthlh	parathyroid hormone-like hormone	0.998399	-0.728637	2.06185	0.0666569	0.217272	-4.18668
50654	Ctss	cathepsin S	1.13638	-0.875851	2.05993	0.0668708	0.217516	-4.18947
691478	Cpne6	copine 6	1.65959	0.407869	2.05887	0.0669884	0.217697	-4.191
309069	Edrf1	erythroid differentiation regulatory factor 1	1.38116	0.40193	2.0587	0.0670072	0.217708	-4.19125
299783	Glipr1	GLI pathogenesis-related 1	1.09904	0.0927087	2.05751	0.0671411	0.217941	-4.19298
499926	Bpifb1	BPI fold containing family B, member 1	1.30275	-0.483027	2.05734	0.0671592	0.21795	-4.19322
365390	Tspan32	tetraspanin 32	1.61313	-0.465717	2.05712	0.0671842	0.21798	-4.19354
301430	Orc2	origin recognition complex, subunit 2	1.27505	0.315681	2.05447	0.0674814	0.218642	-4.19738
362719	Asap2	ArfGAP with SH3 domain, ankyrin repeat and PH domain 2	1.21725	-0.620078	2.05258	0.0676944	0.218979	-4.20012
305096	Klhdc8a	kelch domain containing 8A	1.10751	0.172504	2.04897	0.0681022	0.219844	-4.20534
498486	Gnpnat1	glucosamine-phosphate N-acetyltransferase 1	1.12798	-0.00824303	2.04645	0.0683883	0.220312	-4.20898
60374	Lmna	lamin A/C	1.34131	0.173125	2.04565	0.0684804	0.220436	-4.21015
288701	Srsf9	serine and arginine rich splicing factor 9	1.15242	0.52002	2.04557	0.0684896	0.220436	-4.21027
294019	Calhm2	calcium homeostasis modulator family member 2	1.08072	0.70089	2.0456	0.068486	0.220436	-4.21022
360992	Pnpt1	polyribonucleotide nucleotidyltransferase 1	1.36916	-0.275439	2.04531	0.0685191	0.220481	-4.21064
290783	Tusc3	tumor suppressor candidate 3	1.01764	-0.957953	2.04502	0.0685515	0.220535	-4.21105
114004	Ppp1r14a	protein phosphatase 1, regulatory (inhibitor) subunit 14A	1.15074	0.223614	2.04453	0.0686079	0.220615	-4.21177
292087	Urb2	URB2 ribosome biogenesis homolog	1.17301	0.272296	2.04374	0.0686976	0.220802	-4.2129
27064	Ankrd1	ankyrin repeat domain 1	1.04679	0.675726	2.0419	0.0689084	0.221093	-4.21556
79121	Arf6	ADP-ribosylation factor 6	1.18735	0.626728	2.04158	0.0689451	0.221093	-4.21603
114090	Egr2	early growth response 2	0.93964	0.88103	2.04164	0.0689385	0.221093	-4.21594
100912536	Styx	serine/threonine/tyrosine interacting protein	1.0296	0.127836	2.04169	0.0689321	0.221093	-4.21586
50871	Hpcal1	hippocalcin-like 1	1.08804	0.75725	2.04127	0.0689811	0.221107	-4.21648
361598	Iqgap1	IQ motif containing GTPase activating protein 1	1.15969	0.670878	2.04044	0.0690757	0.221209	-4.21767
24443	Hdc	histidine decarboxylase	1.15812	0.44175	2.03972	0.0691593	0.221301	-4.21872
54311	Timm17a	translocase of inner mitochondrial membrane 17A	1.02632	-0.28476	2.03965	0.0691667	0.221301	-4.21881
286917	Phax	phosphorylated adaptor for RNA export	0.961616	-0.953545	2.03783	0.0693771	0.221692	-4.22145
287772	Psmd12	proteasome 26S subunit, non-ATPase 12	1.07322	-0.105496	2.03797	0.0693611	0.221692	-4.22125
84031	Chn2	chimerin 2	1.06499	0.349494	2.03666	0.0695123	0.221821	-4.22314
114768	Uox	urate oxidase	1.07887	-0.042856	2.0366	0.0695192	0.221821	-4.22323
362029	Agl	amylo-alpha-1, 6-glucosidase, 4-alpha-glucanotransferase	0.952713	0.640313	2.0369	0.0694844	0.221821	-4.22279
25650	Atp1b1	ATPase Na+/K+ transporting subunit beta 1	0.996132	1.05406	2.03326	0.0699057	0.222751	-4.22804
25149	Esr2	estrogen receptor 2	0.972439	-0.221394	2.03233	0.0700144	0.222861	-4.22939
680987	Ciao2b	cytosolic iron-sulfur assembly component 2B	0.945712	0.238003	2.03228	0.0700195	0.222861	-4.22945
691556	Zbtb42	zinc finger and BTB domain containing 42	1.0551	0.374212	2.03267	0.069975	0.222861	-4.2289
24268	Cp	ceruloplasmin	1.31842	-0.259934	2.03083	0.0701893	0.22307	-4.23155
79255	Atf4	activating transcription factor 4	1.29915	-0.382255	2.02923	0.0703754	0.223287	-4.23385
81750	Pros1	protein S	0.994327	-0.511735	2.02905	0.0703967	0.223304	-4.23412
498890	RGD1560212	similar to DNA segment, Chr 18, Wayne State University 98, expressed	1.30877	0.447082	2.02677	0.0706646	0.223952	-4.23741
310486	Rarres1	retinoic acid receptor responder 1	1.06084	-0.467445	2.02507	0.0708643	0.224367	-4.23986
311723	Sox18	SRY box 18	1.00161	-0.366799	2.0251	0.0708604	0.224367	-4.23981
500910	Tnfrsf13c	TNF receptor superfamily member 13C	1.00233	0.263891	2.02543	0.0708215	0.224367	-4.23933
311078	Psmd14	proteasome 26S subunit, non-ATPase 14	1.20229	0.0949916	2.02316	0.071089	0.224539	-4.2426
682967	Tmx3	thioredoxin-related transmembrane protein 3	1.24066	-0.0108104	2.02316	0.0710895	0.224539	-4.24261
85263	Slc25a14	solute carrier family 25 member 14	1.02243	-0.26625	2.02289	0.0711217	0.224556	-4.243
84356	Abcd2	ATP binding cassette subfamily D member 2	1.34468	-0.215612	2.02174	0.071257	0.224824	-4.24465
367092	Arid3b	AT-rich interaction domain 3B	1.21588	0.217717	2.02172	0.0712596	0.224824	-4.24468
245959	Slc25a3	solute carrier family 25 member 3	1.3112	-0.152361	2.02112	0.0713305	0.224997	-4.24554
498977	Dctn3l1	dynactin 3-like 1	1.04997	-0.46632	2.01945	0.0715283	0.22547	-4.24794
366478	Pigv	phosphatidylinositol glycan anchor biosynthesis, class V	0.980146	-0.793682	2.01897	0.0715862	0.225602	-4.24865
367235	Fam135a	family with sequence similarity 135, member A	1.0139	-0.0507217	2.01799	0.0717019	0.225865	-4.25005
313913	Zfp513	zinc finger protein 513	1.27429	-0.0103127	2.01657	0.0718722	0.2263	-4.2521
25468	Kcna2	potassium voltage-gated channel subfamily A member 2	1.13138	-0.0583445	2.01469	0.0720969	0.226754	-4.25481
361600	Tm6sf1	transmembrane 6 superfamily member 1	1.04324	0.362176	2.01486	0.072076	0.226754	-4.25456
362465	Tmtc1	transmembrane and tetratricopeptide repeat containing 1	1.24478	0.0843634	2.01487	0.0720751	0.226754	-4.25454
500137	Neurod6	neuronal differentiation 6	1.2034	0.0183627	2.01489	0.0720727	0.226754	-4.25452
304545	Oasl	2'-5'-oligoadenylate synthetase-like	0.962398	0.702696	2.01331	0.0722617	0.22712	-4.25679
64349	Crybb3	crystallin, beta B3	1.50203	-0.119327	2.01311	0.0722861	0.227146	-4.25708
170820	Prdm4	PR/SET domain 4	1.34118	-0.0188815	2.01187	0.072435	0.227461	-4.25886
308118	Rgs17	regulator of G-protein signaling 17	1.10996	0.118207	2.01096	0.0725446	0.227651	-4.26017
155812	Trim9	tripartite motif-containing 9	0.94938	-0.261872	2.01046	0.0726042	0.227688	-4.26088
502894	Tigar	TP53 induced glycolysis regulatory phosphatase	1.28392	-0.303067	2.00918	0.0727583	0.228018	-4.26272
302982	Eme2	essential meiotic structure-specific endonuclease subunit 2	1.22598	0.218218	2.00829	0.072866	0.228305	-4.264
171393	Clstn3	calsyntenin 3	1.24316	-0.386218	2.00701	0.0730215	0.228487	-4.26584
25656	Guca2a	guanylate cyclase activator 2A	1.10069	0.325591	2.00406	0.0733791	0.229299	-4.27007
681123	Tomm6	translocase of outer mitochondrial membrane 6	1.01063	-0.760531	2.00385	0.073405	0.229329	-4.27038
360926	Lnx1	ligand of numb-protein X 1	1.09782	0.0239841	2.00341	0.0734583	0.229394	-4.27101
25689	Htr5a	5-hydroxytryptamine receptor 5A	1.33995	0.01636	2.00179	0.0736556	0.229755	-4.27333
84587	Plcl1	phospholipase C-like 1	0.937715	-0.335376	1.99912	0.0739823	0.230471	-4.27716
313874	Rasgrp3	RAS guanyl releasing protein 3	1.08049	0.565646	1.99891	0.0740083	0.230497	-4.27746
406162	Notch4	notch 4	1.31114	-0.316627	1.9985	0.0740591	0.230605	-4.27806
24477	Ibsp	integrin-binding sialoprotein	1.27163	0.233625	1.99746	0.074186	0.230744	-4.27954
314622	Cbarp	CACN subunit beta associated regulatory protein	1.2125	-0.385197	1.99752	0.0741797	0.230744	-4.27946
688394	Mab21l1	mab-21 like 1	1.28747	0.02127	1.99761	0.0741678	0.230744	-4.27933
302500	Mcts1	MCTS1, re-initiation and release factor	1.21552	-0.936667	1.99725	0.0742119	0.230774	-4.27984
292892	Irf3	interferon regulatory factor 3	1.17859	0.321316	1.99701	0.0742416	0.230815	-4.28019
29431	Pak1	p21 (RAC1) activated kinase 1	1.13895	-0.485309	1.99638	0.0743198	0.231003	-4.2811
282583	Fbln2	fibulin 2	1.12939	-0.195349	1.99393	0.0746223	0.231599	-4.28461
290029	Pnp	purine nucleoside phosphorylase	0.976331	-0.172002	1.99419	0.07459	0.231599	-4.28424
295214	S100a1	S100 calcium binding protein A1	1.48499	0.334965	1.9939	0.0746255	0.231599	-4.28465
366001	Arrdc1	arrestin domain containing 1	1.11609	-0.290596	1.99362	0.0746603	0.231656	-4.28505
58823	Nckap1	NCK-associated protein 1	0.914944	-0.132718	1.99202	0.0748588	0.231791	-4.28735
171122	Rab29	RAB29, member RAS oncogene family	0.963491	-0.621732	1.99205	0.0748548	0.231791	-4.2873
171385	Acmsd	aminocarboxymuconate semialdehyde decarboxylase	0.979697	0.475734	1.99194	0.0748687	0.231791	-4.28746
294430	Calhm6	calcium homeostasis modulator family member 6	1.41556	0.324313	1.99198	0.0748631	0.231791	-4.2874
304603	Apon	apolipoprotein N	1.34388	0.151518	1.99257	0.0747896	0.231791	-4.28655
100359879	Tmem91	transmembrane protein 91	1.2775	0.272789	1.9926	0.0747863	0.231791	-4.28651
299075	Trappc6b	trafficking protein particle complex 6B	1.03664	-0.190751	1.99148	0.0749249	0.231914	-4.28811
316232	Dlk2	delta like non-canonical Notch ligand 2	1.49549	0.0237903	1.99104	0.0749795	0.232026	-4.28874
361783	Zfp57	zinc finger protein 57	0.878356	0.926974	1.99093	0.0749939	0.232026	-4.2889
24530	Lcat	lecithin cholesterol acyltransferase	1.20549	0.302984	1.9899	0.0751213	0.232187	-4.29037
58963	Htr3b	5-hydroxytryptamine receptor 3B	1.07435	-0.246781	1.99012	0.0750937	0.232187	-4.29005
114122	Vcan	versican	0.867698	-0.209777	1.98985	0.0751285	0.232187	-4.29045
303831	Eif4a2	eukaryotic translation initiation factor 4A2	1.53454	0.24077	1.99037	0.0750626	0.232187	-4.2897
307348	Spire1	spire-type actin nucleation factor 1	1.06214	0.812307	1.98936	0.0751893	0.232222	-4.29115
24678	Pkib	cAMP-dependent protein kinase inhibitor beta	1.09103	-0.315883	1.98773	0.0753919	0.232459	-4.29348
64025	Cd244	CD244 molecule	0.98856	-0.435404	1.98761	0.0754071	0.232459	-4.29365
64547	Bcl2l11	BCL2 like 11	0.899017	-0.762467	1.98799	0.0753601	0.232459	-4.29312
314655	Adamts10	ADAM metallopeptidase with thrombospondin type 1 motif, 10	1.17733	-0.566048	1.98824	0.0753289	0.232459	-4.29276
474146	Hcst	hematopoietic cell signal transducer	0.993672	-0.231401	1.98809	0.0753467	0.232459	-4.29296
688813	Dda1	DET1 and DDB1 associated 1	1.10288	0.234447	1.98755	0.0754149	0.232459	-4.29374
361816	Zfand3	zinc finger AN1-type containing 3	1.0196	0.629845	1.98637	0.0755623	0.232811	-4.29543
304656	Ccdc130	coiled-coil domain containing 130	1.17946	0.0456725	1.98557	0.0756617	0.233015	-4.29657
362584	Col9a2	collagen type IX alpha 2 chain	1.23123	-0.0939807	1.98531	0.0756951	0.233067	-4.29695
29593	Ckmt1	creatine kinase, mitochondrial 1	1.36419	0.277349	1.98498	0.0757366	0.233144	-4.29742
312670	Adipor2	adiponectin receptor 2	0.862791	1.0347	1.98477	0.0757625	0.233157	-4.29772
681315	Tmem230	transmembrane protein 230	0.994723	-0.272997	1.98274	0.0760176	0.233753	-4.30062
60357	Prom1	prominin 1	1.23565	-0.0227126	1.98211	0.0760968	0.233844	-4.30152
116470	Stx1a	syntaxin 1A	1.30004	-0.260941	1.98174	0.076143	0.233884	-4.30204
362391	Mxd1	max dimerization protein 1	1.26061	0.27229	1.98131	0.0761971	0.233998	-4.30266
50866	Rab4b	RAB4B, member RAS oncogene family	1.01094	0.525504	1.98078	0.0762647	0.234002	-4.30342
282845	Rnf34	ring finger protein 34	1.0235	-0.77444	1.98103	0.0762327	0.234002	-4.30306
363160	Stt3b	STT3B, catalytic subunit of the oligosaccharyltransferase complex	1.34362	0.185829	1.98092	0.0762465	0.234002	-4.30322
500557	Nkain1	Sodium/potassium transporting ATPase interacting 1	0.944785	-0.804978	1.98029	0.0763268	0.234141	-4.30413
266735	Adgrg2	adhesion G protein-coupled receptor G2	1.11052	-0.506005	1.97861	0.0765394	0.234689	-4.30653
25659	Khk	ketohexokinase	1.30552	0.278305	1.9774	0.076692	0.235056	-4.30825
365550	Vpreb3	V-set pre-B cell surrogate light chain 3	1.03716	-0.0051801	1.97632	0.0768299	0.235376	-4.3098
108348043	NEWGENE_2812	homeobox A1	0.980058	0.331409	1.97641	0.0768179	0.235376	-4.30966
246774	Gimap5	GTPase, IMAP family member 5	1.1141	-0.779206	1.97522	0.0769698	0.235634	-4.31137
65154	Ccn4	cellular communication network factor 4	0.886839	0.329241	1.97376	0.0771559	0.23576	-4.31345
246310	Arfgap1	ADP-ribosylation factor GTPase activating protein 1	1.72347	-0.0346587	1.97375	0.0771562	0.23576	-4.31346
680712	Scx	scleraxis bHLH transcription factor	1.07932	0.534972	1.97381	0.0771483	0.23576	-4.31337
685707	Nav1	neuron navigator 1	1.03657	-0.558916	1.97339	0.0772029	0.23583	-4.31398
684755	Zfpl1	zinc finger protein-like 1	1.12281	-0.401467	1.97268	0.0772929	0.23587	-4.31499
288907	Podnl1	podocan-like 1	1.53039	-0.144913	1.9725	0.077316	0.235889	-4.31524
293673	Eif1ad	eukaryotic translation initiation factor 1A domain containing	0.999764	0.645674	1.97003	0.0776321	0.236546	-4.31876
313139	Slc35a1	solute carrier family 35 member A1	1.03389	-0.650048	1.96859	0.0778183	0.236754	-4.32083
291577	Chsy3	chondroitin sulfate synthase 3	1.23185	-0.643525	1.96776	0.0779251	0.236874	-4.32201
498951	Il34	interleukin 34	1.28131	-0.591796	1.9671	0.0780089	0.237026	-4.32294
84599	Tmed10	transmembrane p24 trafficking protein 10	1.11559	-0.09968	1.96556	0.0782084	0.237135	-4.32514
245982	Coro6	coronin 6	1.10878	-0.294209	1.9662	0.0781253	0.237135	-4.32423
289786	Nacad	NAC alpha domain containing	0.973106	-0.160418	1.96607	0.0781429	0.237135	-4.32442
102551473	LOC102551473	uncharacterized LOC102551473	1.42967	0.0530462	1.96164	0.0787158	0.237992	-4.33072
494125	Rcn3	reticulocalbin 3	1.49006	-0.497371	1.96121	0.0787729	0.238113	-4.33134
25363	Acadvl	acyl-CoA dehydrogenase, very long chain	0.941867	-0.0856412	1.96031	0.07889	0.238416	-4.33263
301124	Micos13	mitochondrial contact site and cristae organizing system subunit 13	1.14378	-0.395269	1.95878	0.0790889	0.238863	-4.3348
299186	Dpf3	double PHD fingers 3	1.62657	-0.528233	1.95843	0.0791344	0.238898	-4.33529
366998	Nfe2	nuclear factor, erythroid 2	1.09356	-0.321661	1.9579	0.0792038	0.239005	-4.33605
171147	Slc2a13	solute carrier family 2 member 13	0.923694	0.158309	1.95677	0.0793516	0.239194	-4.33765
65170	Scamp4	secretory carrier membrane protein 4	1.18992	0.881536	1.95565	0.0794994	0.239434	-4.33926
497933	Slc25a35	solute carrier family 25, member 35	0.978042	0.318104	1.95397	0.0797196	0.239892	-4.34164
293112	Crebzf	CREB/ATF bZIP transcription factor	1.12659	-0.288629	1.95199	0.0799809	0.240267	-4.34446
498140	Cdk8	cyclin-dependent kinase 8	0.928682	0.672683	1.95176	0.0800109	0.24029	-4.34478
64001	Cyb5a	cytochrome b5 type A	0.857477	-1.19018	1.9507	0.0801515	0.240488	-4.34629
252920	Olfm3	olfactomedin 3	1.0382	0.323024	1.94866	0.0804212	0.240929	-4.34918
287884	Sectm1b	secreted and transmembrane 1B	0.980258	0.55729	1.94842	0.0804537	0.240967	-4.34953
266685	Ugt2b17	UDP glucuronosyltransferase 2 family, polypeptide B15	1.19137	0.068868	1.94732	0.080599	0.241094	-4.35108
301067	Slc25a38	solute carrier family 25, member 38	1.08072	0.0669373	1.94638	0.0807245	0.241264	-4.35242
156117	Casp12	caspase 12	1.07546	0.549328	1.946	0.0807754	0.241365	-4.35297
114119	Gng10	G protein subunit gamma 10	1.40702	-0.442754	1.94427	0.0810059	0.241849	-4.35542
59087	Nxf1	nuclear RNA export factor 1	1.09126	0.482077	1.94356	0.0811011	0.241979	-4.35643
83581	Polr1a	RNA polymerase I subunit A	1.36916	-0.20544	1.94236	0.0812614	0.242149	-4.35813
116721	Abcc5	ATP binding cassette subfamily C member 5	1.2164	0.437879	1.94247	0.0812471	0.242149	-4.35798
100190936	Rnf123	ring finger protein 123	1.02213	-0.0948737	1.94206	0.0813011	0.242216	-4.35855
83583	Rabac1	Rab acceptor 1	0.848641	-0.151568	1.94105	0.0814363	0.242457	-4.35998
500902	RGD1565356	similar to RIKEN cDNA 2210421G13	1.26485	-0.0629805	1.94016	0.0815568	0.242555	-4.36125
287285	Shroom1	shroom family member 1	1.23139	-0.443997	1.93966	0.0816234	0.242592	-4.36195
287125	Nubp2	nucleotide binding protein 2	1.0235	-0.629037	1.93921	0.0816846	0.242639	-4.3626
304396	Lrwd1	leucine-rich repeats and WD repeat domain containing 1	1.04014	-0.894951	1.93814	0.0818287	0.242899	-4.36411
103691893	LOC103691893	putative ERV-F(c)1 provirus ancestral Env polyprotein	1.40386	-0.411913	1.93804	0.0818412	0.242899	-4.36424
361180	Grtp1	growth hormone regulated TBC protein 1	0.88024	-0.65565	1.93774	0.0818821	0.242969	-4.36467
295243	Krtcap2	keratinocyte associated protein 2	0.956146	-0.486318	1.93747	0.0819189	0.242975	-4.36506
362712	Drc1	dynein regulatory complex subunit 1	1.09115	0.113505	1.93634	0.0820712	0.243324	-4.36666
291206	Mrpl32	mitochondrial ribosomal protein L32	0.986192	-0.978415	1.93613	0.0820998	0.243358	-4.36696
309003	Zfp646	zinc finger protein 646	0.973486	-0.603158	1.93542	0.0821961	0.243592	-4.36796
113922	Selenof	selenoprotein F	1.4023	-0.512495	1.93472	0.0822904	0.243666	-4.36895
116554	Mapk8	mitogen-activated protein kinase 8	0.909717	0.265773	1.93491	0.0822655	0.243666	-4.36869
64545	Icos	inducible T-cell co-stimulator	1.18111	0.841277	1.93355	0.0824501	0.244029	-4.37062
304785	Slc45a3	solute carrier family 45, member 3	1.25726	0.337429	1.93344	0.082465	0.244029	-4.37077
292794	Ffar2	free fatty acid receptor 2	1.28221	0.432137	1.93222	0.0826303	0.244313	-4.37249
291180	Epdr1	ependymin related 1	0.993403	0.732784	1.93178	0.0826902	0.244379	-4.37312
296156	Cpxm1	carboxypeptidase X (M14 family), member 1	1.09624	-0.353521	1.93117	0.0827734	0.244479	-4.37398
307492	Hars	histidyl-tRNA synthetase	1.23647	0.32095	1.93057	0.0828545	0.244641	-4.37482
100360772	Zfp17	zinc finger protein 585B	0.935784	-0.664697	1.93051	0.0828631	0.244641	-4.37491
301570	Sp110	SP110 nuclear body protein	1.12213	0.563274	1.9283	0.0831651	0.245326	-4.37804
60384	Copb2	coatomer protein complex subunit beta 2	1.74127	-0.501517	1.9249	0.0836314	0.24622	-4.38284
312398	Smarcad1	SWI/SNF-related, matrix-associated actin-dependent regulator of chromatin, subfamily a, containing DEAD/H box 1`	0.908799	0.580308	1.92518	0.0835931	0.24622	-4.38245
310695	Kirrel1	kirre like nephrin family adhesion molecule 1	0.973662	-0.187308	1.92389	0.0837706	0.246441	-4.38427
287545	Sarm1	sterile alpha and TIR motif containing 1	1.01153	-0.379825	1.9228	0.0839212	0.246629	-4.38581
306628	Col4a2	collagen type IV alpha 2 chain	0.926853	-0.114986	1.92244	0.0839713	0.246629	-4.38632
360903	Fgfrl1	fibroblast growth factor receptor-like 1	1.05889	-0.000902369	1.92292	0.0839046	0.246629	-4.38564
362245	Map1lc3a	microtubule-associated protein 1 light chain 3 alpha	0.951999	0.935358	1.92229	0.0839926	0.246629	-4.38654
100909866	LOC100909866	uncharacterized LOC100909866	1.35715	-0.473631	1.9214	0.0841154	0.246784	-4.38779
686323	Trip6	thyroid hormone receptor interactor 6	1.35031	-0.278981	1.91939	0.0843936	0.247342	-4.39063
305419	Pi4k2b	phosphatidylinositol 4-kinase type 2 beta	1.25954	0.49253	1.91884	0.0844694	0.247492	-4.3914
362613	Zdhhc18	zinc finger, DHHC-type containing 18	1.12922	-0.0501256	1.91789	0.0846015	0.247539	-4.39274
83477	Bcl10	BCL10, immune signaling adaptor	1.01188	0.778671	1.91741	0.0846694	0.247686	-4.39343
306804	Iars	isoleucyl-tRNA synthetase	1.23652	-0.56414	1.91679	0.0847551	0.247782	-4.3943
65042	Sfxn3	sideroflexin 3	0.969845	1.15639	1.91556	0.0849267	0.248129	-4.39603
50561	Resp18	regulated endocrine-specific protein 18	1.10662	-0.0082697	1.91368	0.0851895	0.248463	-4.39868
292766	Psmd8	proteasome 26S subunit, non-ATPase 8	0.899031	0.876703	1.91344	0.0852234	0.248463	-4.39902
312310	RGD1559747	similar to Zinc finger and SCAN domain containing protein 2 (Zinc finger protein 29)	1.2893	0.514482	1.91437	0.0850933	0.248463	-4.39771
100911462	Txnl4a	thioredoxin-like 4A	1.25642	0.168305	1.91335	0.0852353	0.248463	-4.39914
103693239	Arl4c	ADP ribosylation factor like GTPase 4C	0.968151	0.11667	1.91269	0.0853287	0.248475	-4.40008
24691	Prss1	serine protease 1	1.19388	-0.682687	1.91164	0.0854759	0.248546	-4.40156
64527	Pdap1	PDGFA associated protein 1	1.22891	-0.541979	1.91016	0.0856839	0.248686	-4.40365
308376	Adgrg6	adhesion G protein-coupled receptor G6	1.12431	0.712624	1.91022	0.0856747	0.248686	-4.40355
362517	Mrpl50	mitochondrial ribosomal protein L50	1.21296	-0.361773	1.91032	0.0856609	0.248686	-4.40341
25471	Kcne1	potassium voltage-gated channel subfamily E regulatory subunit 1	1.06037	0.0414774	1.90807	0.0859782	0.249234	-4.40658
50690	Slc6a8	solute carrier family 6 member 8	1.1087	-0.448973	1.90556	0.0863334	0.250161	-4.41012
102553978	LOC102553978	uncharacterized LOC102553978	1.19703	0.279392	1.90277	0.0867296	0.250792	-4.41404
287419	Rangrf	RAN guanine nucleotide release factor	0.885323	-0.820518	1.90183	0.0868643	0.251078	-4.41537
94194	Cox5b	cytochrome c oxidase subunit 5B	1.19934	-0.29967	1.90156	0.0869028	0.251138	-4.41575
24495	Il3	interleukin 3	1.322	-0.210357	1.90129	0.0869417	0.251199	-4.41613
50687	L1cam	L1 cell adhesion molecule	1.09841	-0.695607	1.90086	0.0870018	0.251269	-4.41673
499211	Gdpd5	glycerophosphodiester phosphodiesterase domain containing 5	1.29208	0.602352	1.89983	0.0871502	0.251646	-4.41819
689537	Calr4	calreticulin 4	1.26631	0.0794639	1.89932	0.0872232	0.251753	-4.4189
361332	Adamts19	ADAM metallopeptidase with thrombospondin type 1 motif, 19	1.07424	0.0557047	1.89852	0.087337	0.251985	-4.42002
102554668	LOC102554668	uncharacterized LOC102554668	1.16185	0.0896312	1.8985	0.0873393	0.251985	-4.42004
171080	Slc17a1	solute carrier family 17 member 1	1.14609	0.370161	1.89821	0.0873821	0.252057	-4.42046
192210	Dnajc21	DnaJ heat shock protein family (Hsp40) member C21	0.974949	-0.211595	1.8968	0.0875834	0.252426	-4.42243
314824	Osbpl8	oxysterol binding protein-like 8	1.20919	0.289072	1.89669	0.0875999	0.252426	-4.42259
100912031	LOC100912031	uncharacterized LOC100912031	0.956625	0.634872	1.89425	0.0879517	0.253025	-4.42602
103691864	LOC103691864	uncharacterized LOC103691864	0.874611	-0.597971	1.89461	0.0878993	0.253025	-4.42551
94203	Pgf	placental growth factor	1.09833	-0.289132	1.894	0.0879865	0.253074	-4.42636
314623	Midn	midnolin	1.01985	-0.756805	1.89308	0.0881198	0.253249	-4.42766
361387	Zfp330	zinc finger protein 330	1.06529	-0.409085	1.89212	0.0882587	0.253442	-4.42901
311840	Urm1	ubiquitin related modifier 1	1.11884	-0.464047	1.89156	0.08834	0.253624	-4.42979
287422	Per1	period circadian regulator 1	1.15441	0.0799844	1.89105	0.0884136	0.253646	-4.43051
289820	Actr2	ARP2 actin related protein 2 homolog	0.910059	0.379847	1.89101	0.0884199	0.253646	-4.43057
361425	Emc8	ER membrane protein complex subunit 8	1.17987	-0.0992516	1.89127	0.0883827	0.253646	-4.43021
683713	Gal3st1	galactose-3-O-sulfotransferase 1	1.15295	0.336771	1.8901	0.0885514	0.253889	-4.43184
690919	Nrg4	neuregulin 4	1.04487	0.434339	1.88943	0.088649	0.254096	-4.43278
500534	Ccdc24	coiled-coil domain containing 24	1.30329	-0.19758	1.88839	0.0888001	0.254477	-4.43424
24316	Drd1	dopamine receptor D1	0.992215	-0.448597	1.88741	0.0889433	0.254551	-4.43562
80840	Gpr12	G protein-coupled receptor 12	1.12897	-0.0977254	1.8871	0.0889889	0.254551	-4.43605
117515	Sept2	septin 2	1.29619	0.0949662	1.88764	0.0889095	0.254551	-4.43529
314280	Smoc1	SPARC related modular calcium binding 1	1.29513	0.423367	1.88724	0.0889685	0.254551	-4.43586
64019	Pag1	phosphoprotein membrane anchor with glycosphingolipid microdomains 1	1.02752	0.0404077	1.88611	0.0891326	0.254859	-4.43743
102552920	LOC102552920	armadillo repeat-containing X-linked protein 5-like	0.940946	-0.671774	1.88599	0.0891507	0.254859	-4.43761
292925	Tsg101	tumor susceptibility 101	0.834945	-0.339083	1.88558	0.0892098	0.254924	-4.43817
362900	Rnf19a	ring finger protein 19A, RBR E3 ubiquitin protein ligase	0.858198	0.187431	1.8848	0.0893246	0.255177	-4.43927
116681	Dlgap2	DLG associated protein 2	1.27944	0.437193	1.88416	0.0894183	0.255194	-4.44017
65164	Htra1	HtrA serine peptidase 1	1.21754	-0.442319	1.8835	0.089514	0.255378	-4.44108
290912	Arglu1	arginine and glutamate rich 1	1.16793	-0.096461	1.88305	0.0895805	0.255445	-4.44172
24331	Cela1	chymotrypsin-like elastase family, member 1	0.954665	-1.01989	1.88135	0.0898308	0.255919	-4.4441
654496	Fubp1	far upstream element binding protein 1	1.26973	0.157998	1.8811	0.0898674	0.255971	-4.44445
81645	Chrm2	cholinergic receptor, muscarinic 2	0.884316	0.256497	1.87902	0.0901745	0.256534	-4.44737
315345	Copz1	coatomer protein complex, subunit zeta 1	0.890246	0.345325	1.87903	0.0901719	0.256534	-4.44734
295297	Etv3	ets variant 3	1.16789	-0.0409331	1.8775	0.0903979	0.256962	-4.44948
361570	Prrg2	proline rich and Gla domain 2	1.08737	-0.738636	1.87665	0.0905243	0.257211	-4.45068
64635	Snd1	staphylococcal nuclease and tudor domain containing 1	0.919687	0.725817	1.87311	0.0910499	0.258293	-4.45562
84683	Cox4i2	cytochrome c oxidase subunit 4i2	1.00467	0.230974	1.87263	0.0911216	0.258439	-4.45629
29131	Cartpt	CART prepropeptide	0.897467	-0.805367	1.8714	0.0913059	0.258811	-4.45802
93662	Cdhr1	cadherin-related family member 1	1.09704	-0.260158	1.87066	0.0914161	0.259029	-4.45905
311795	Tor4a	torsin family 4, member A	0.877961	0.935012	1.87063	0.0914199	0.259029	-4.45908
29642	Slc38a2	solute carrier family 38, member 2	0.849428	0.519212	1.87035	0.091462	0.259096	-4.45948
113912	Rtn4r	reticulon 4 receptor	1.10172	-0.70511	1.8692	0.0916345	0.259369	-4.46108
24826	Tg	thyroglobulin	1.23069	0.157702	1.86788	0.0918333	0.25973	-4.46293
310877	Tifa	TRAF-interacting protein with forkhead-associated domain	1.12937	0.234713	1.86775	0.0918521	0.25973	-4.46311
287564	Tmem132e	transmembrane protein 132E	1.01339	0.245319	1.86724	0.0919293	0.259803	-4.46382
500800	Ccdc105	coiled-coil domain containing 105	1.10091	-0.471428	1.86721	0.091933	0.259803	-4.46386
300047	Cyc1	cytochrome c-1	1.0734	-0.717007	1.86501	0.0922648	0.260399	-4.46693
25711	Gucy2c	guanylate cyclase 2C	1.27153	0.125723	1.86457	0.0923305	0.260455	-4.46754
113901	Chia	chitinase, acidic	0.948043	-0.76335	1.86385	0.0924394	0.260553	-4.46855
295498	Adh6a	alcohol dehydrogenase 6A (class V)	1.16016	0.538697	1.86402	0.0924144	0.260553	-4.46831
679692	Lpgat1	lysophosphatidylglycerol acyltransferase 1	1.00375	-0.674057	1.86402	0.0924139	0.260553	-4.46831
293684	Scyl1	SCY1 like pseudokinase 1	1.22088	0.646922	1.86367	0.0924668	0.260578	-4.4688
94269	Fez2	fasciculation and elongation protein zeta 2	0.805145	1.11808	1.86306	0.0925595	0.260787	-4.46965
100362346	Mta3	metastasis associated 1 family, member 3	1.02599	-0.626006	1.86235	0.0926667	0.261037	-4.47064
25595	Map2	microtubule-associated protein 2	0.83294	-0.982212	1.86206	0.0927104	0.261105	-4.47104
361391	Cbfb	core-binding factor subunit beta	1.03734	-0.646955	1.86158	0.0927838	0.261105	-4.47172
499083	Zscan18	zinc finger and SCAN domain containing 18	1.42246	-0.31609	1.86181	0.0927478	0.261105	-4.47139
102550987	LOC102550987	uncharacterized LOC102550987	1.22726	-0.372911	1.86187	0.0927386	0.261105	-4.4713
59329	Sik1	salt-inducible kinase 1	0.900053	-0.774242	1.86066	0.0929227	0.261339	-4.47299
29457	Map6	microtubule-associated protein 6	1.28344	0.57641	1.86028	0.0929806	0.26145	-4.47352
100363310	Cystm1	cysteine-rich transmembrane module containing 1	0.852834	1.16898	1.85997	0.0930282	0.261513	-4.47396
80722	Sost	sclerostin	0.934687	0.876455	1.85922	0.093141	0.261587	-4.47499
171517	Gpc2	glypican 2	1.21384	-0.181744	1.85946	0.0931051	0.261587	-4.47466
78979	Tas2r119	taste receptor, type 2, member 119	1.35996	-0.0145885	1.85908	0.0931634	0.261598	-4.4752
79146	Begain	brain-enriched guanylate kinase-associated	0.921467	-0.142063	1.85728	0.0934369	0.262209	-4.4777
102552343	LOC102552343	uncharacterized LOC102552343	1.13288	0.703778	1.85629	0.093588	0.262463	-4.47907
29213	Tubb4a	tubulin, beta 4A class IVa	1.1331	-0.39826	1.8536	0.0939996	0.263105	-4.48281
298084	Zbtb5	zinc finger and BTB domain containing 5	1.11823	0.819869	1.85388	0.0939578	0.263105	-4.48243
25059	Hk2	hexokinase 2	1.06878	0.685477	1.85281	0.094121	0.263236	-4.48391
360640	Map3k14	mitogen-activated protein kinase kinase kinase 14	1.00185	-0.808622	1.85282	0.0941197	0.263236	-4.4839
24484	Igfbp3	insulin-like growth factor binding protein 3	1.34922	-0.40816	1.85224	0.0942101	0.263275	-4.48472
310704	Bcl9	BCL9, transcription coactivator	1.12973	-0.893572	1.85231	0.094198	0.263275	-4.48461
684996	Mplkip	M-phase specific PLK1 interacting protein	0.990427	-0.196512	1.85208	0.0942341	0.26329	-4.48494
289264	Grem2	gremlin 2, DAN family BMP antagonist	1.2419	-0.407248	1.85103	0.0943961	0.263533	-4.4864
100365504	Sf3b6	splicing factor 3B, subunit 6	1.06481	-0.731178	1.84955	0.0946234	0.263906	-4.48845
289584	Usp46	ubiquitin specific peptidase 46	0.923786	-0.446166	1.84934	0.0946561	0.263945	-4.48874
29471	Npy4r	neuropeptide Y receptor Y4	1.35835	-0.1824	1.84697	0.0950232	0.264417	-4.49204
171335	Cox8a	cytochrome c oxidase subunit 8A	1.19217	-0.212547	1.84726	0.0949786	0.264417	-4.49164
295663	Phospho2	phosphatase, orphan 2	1.11394	-0.129062	1.84705	0.0950102	0.264417	-4.49192
309126	Tnpo1	transportin 1	1.01474	-0.510772	1.84751	0.0949399	0.264417	-4.49129
680329	LOC680329	immunoglobulin lambda-like polypeptide 5-like	0.872506	-0.174979	1.84695	0.0950253	0.264417	-4.49206
78963	Apaf1	apoptotic peptidase activating factor 1	1.04921	0.298927	1.84536	0.0952734	0.264806	-4.49427
304860	Npl	N-acetylneuraminate pyruvate lyase	1.34165	0.284134	1.84491	0.0953421	0.264806	-4.49489
367039	Dock6	dedicator of cytokinesis 6	1.0991	-0.0634987	1.84493	0.0953396	0.264806	-4.49487
103689969	Kdm6a	lysine demethylase 6A	0.949279	-0.199539	1.8448	0.0953604	0.264806	-4.49505
286978	Tmsb15b2	thymosin beta 15B2	1.33521	0.689648	1.84325	0.0956013	0.265213	-4.4972
292755	Nccrp1	non-specific cytotoxic cell receptor protein 1 homolog (zebrafish)	1.15262	-0.141412	1.84337	0.0955825	0.265213	-4.49703
100360533	Fam57a	family with sequence similarity 57, member A	1.10771	0.476745	1.84331	0.0955918	0.265213	-4.49711
296603	Vav2	vav guanine nucleotide exchange factor 2	1.36162	0.182606	1.84292	0.0956531	0.265263	-4.49766
296789	Sema3e	semaphorin 3E	1.37208	-0.456783	1.84255	0.0957103	0.265263	-4.49817
679357	Irf2bp2	interferon regulatory factor 2 binding protein 2	0.973348	-0.255782	1.84253	0.0957136	0.265263	-4.4982
24296	Cyp1a1	cytochrome P450, family 1, subfamily a, polypeptide 1	0.814332	-1.30112	1.83945	0.0961945	0.266334	-4.50246
314996	Klhl38	kelch-like family member 38	1.04716	-0.620326	1.83905	0.0962578	0.266404	-4.50302
293619	Pkp3	plakophilin 3	1.16104	-0.216699	1.83666	0.0966341	0.267288	-4.50634
84468	Chst3	carbohydrate sulfotransferase 3	1.12979	0.232417	1.83644	0.0966682	0.26729	-4.50664
81722	Ager	advanced glycosylation end product-specific receptor	1.0338	0.433306	1.83579	0.096771	0.267476	-4.50754
499602	Abhd18	abhydrolase domain containing 18	0.922476	-0.436881	1.83567	0.0967896	0.267476	-4.5077
303569	Rundc3a	RUN domain containing 3A	0.875474	-0.307246	1.83327	0.0971686	0.268292	-4.51103
295224	mrpl24	mitochondrial ribosomal protein L24	1.12952	-0.63441	1.83168	0.0974211	0.268567	-4.51323
246323	Aard	alanine and arginine rich domain containing protein	1.03229	-0.585141	1.83149	0.0974505	0.268595	-4.51349
691506	Ttc19	tetratricopeptide repeat domain 19	0.869323	0.0165608	1.83023	0.0976508	0.269042	-4.51523
117243	Acsl6	acyl-CoA synthetase long-chain family member 6	0.869236	-0.574715	1.8291	0.0978305	0.269358	-4.51679
108348178	NEWGENE_1309258	VPS37C, ESCRT-I subunit	1.03946	1.00192	1.8289	0.0978629	0.269362	-4.51708
500227	LOC500227	hypothetical gene supported by BC079424	0.952874	-0.339091	1.82872	0.0978906	0.269386	-4.51732
293738	Ccdc86	coiled-coil domain containing 86	1.07283	0.859745	1.82809	0.097991	0.269541	-4.51819
304195	Pcp2	Purkinje cell protein 2	1.04932	0.486182	1.82801	0.0980045	0.269541	-4.5183
690354	Lyrm2	LYR motif containing 2	0.847518	-1.0688	1.8272	0.0981339	0.269739	-4.51942
304063	Ets2	ETS proto-oncogene 2, transcription factor	0.805297	-0.119457	1.8253	0.0984375	0.270309	-4.52205
54254	Gata4	GATA binding protein 4	1.13943	-0.19057	1.82458	0.098552	0.270418	-4.52303
289057	Cfhr1	complement factor H-related 1	0.974469	-0.256527	1.82386	0.0986683	0.270515	-4.52404
25338	Ninj1	ninjurin 1	1.06466	-0.151405	1.8234	0.0987418	0.270564	-4.52467
100158233	Slc35a2	solute carrier family 35 member A2	0.979591	0.0623546	1.82257	0.0988751	0.270823	-4.52581
54321	Cnn3	calponin 3	1.25288	-0.30515	1.82203	0.0989629	0.270885	-4.52657
100912167	LOC100912167	uncharacterized LOC100912167	0.966982	-0.328359	1.82211	0.0989496	0.270885	-4.52645
363013	Tmem123	transmembrane protein 123	0.841729	0.19544	1.82085	0.0991524	0.271213	-4.52819
360709	Tfg	Trk-fused gene	1.09611	0.523166	1.82038	0.0992279	0.271314	-4.52883
500536	Hyi	hydroxypyruvate isomerase	0.992333	-0.656529	1.81761	0.0996758	0.272169	-4.53266
362701	Capn13	calpain 13	1.07178	0.276785	1.81679	0.0998093	0.272427	-4.53379
24645	Pgm1	phosphoglucomutase 1	0.89859	-0.60437	1.81469	0.10015	0.272932	-4.53668
64156	Uba52	ubiquitin A-52 residue ribosomal protein fusion product 1	0.981763	-0.608223	1.81429	0.100215	0.273057	-4.53723
292878	Emc10	ER membrane protein complex subunit 10	0.997009	-0.462499	1.81361	0.100327	0.273203	-4.53817
257645	Itgb5	integrin subunit beta 5	0.878838	0.135302	1.81241	0.100522	0.273629	-4.53982
305506	Eif6	eukaryotic translation initiation factor 6	0.806243	-0.274376	1.81114	0.10073	0.27389	-4.54157
309170	Fam89b	family with sequence similarity 89, member B	0.825009	-1.0323	1.80977	0.100953	0.274213	-4.54345
315405	Dcun1d5	defective in cullin neddylation 1 domain containing 5	1.05135	-0.872319	1.80935	0.101023	0.274249	-4.54403
58974	Gabarap	GABA type A receptor-associated protein	1.28194	0.080085	1.80884	0.101106	0.274421	-4.54473
25569	Trh	thyrotropin releasing hormone	0.994165	-0.806675	1.80849	0.101164	0.274483	-4.54522
298606	Slc25a34	solute carrier family 25, member 34	0.940889	-0.482036	1.80845	0.101171	0.274483	-4.54527
313346	Focad	focadhesin	1.0815	0.0261668	1.80562	0.101635	0.275179	-4.54915
498038	Vgll3	vestigial-like family member 3	0.877831	1.0769	1.80548	0.101659	0.275179	-4.54935
103693537	LOC103693537	keratin-associated protein 13-1-like	1.02467	0.0587401	1.80381	0.101935	0.275663	-4.55165
685620	Tomm7	translocase of outer mitochondrial membrane 7	1.1636	0.168881	1.80316	0.102043	0.275742	-4.55255
298596	Sdhb	succinate dehydrogenase complex iron sulfur subunit B	1.10486	-0.728897	1.80176	0.102274	0.276259	-4.55446
100910949	LOC100910949	uncharacterized LOC100910949	1.35006	-0.182832	1.80015	0.102542	0.276771	-4.55668
85494	Tpra1	transmembrane protein adipocyte associated 1	0.962745	0.471958	1.79958	0.102636	0.27688	-4.55745
83784	Agxt2	alanine-glyoxylate aminotransferase 2	1.11467	0.182	1.79874	0.102776	0.277083	-4.5586
100302372	LOC100302372	hypothetical protein LOC100302372	0.915242	-0.0661995	1.79807	0.102888	0.277317	-4.55953
83510	Lypla2	lysophospholipase 2	1.34294	0.507323	1.79735	0.103009	0.277499	-4.56052
286912	Krt20	keratin 20	1.35812	-0.482482	1.79717	0.103038	0.277524	-4.56076
114520	Strn3	striatin 3	0.889465	0.600805	1.79541	0.103333	0.277945	-4.56318
81869	Gstm7	glutathione S-transferase, mu 7	1.33248	0.196185	1.79516	0.103375	0.277953	-4.56352
24884	Yes1	YES proto-oncogene 1, Src family tyrosine kinase	1.0178	0.176654	1.79433	0.103514	0.278167	-4.56466
688621	Tslp	thymic stromal lymphopoietin	0.829569	0.0375613	1.79368	0.103623	0.278299	-4.56555
102553190	LOC102553190	uncharacterized LOC102553190	0.868189	-0.0525727	1.79345	0.103661	0.278348	-4.56585
498891	Dipk1c	divergent protein kinase domain 1C	1.01203	-0.166875	1.79327	0.103691	0.278349	-4.5661
64310	Arf1	ADP-ribosylation factor 1	1.35825	-0.0303341	1.79294	0.103747	0.27842	-4.56656
289753	Rhbdd3	rhomboid domain containing 3	1.31044	-0.742855	1.79219	0.103874	0.27852	-4.56759
100911553	LOC100911553	uncharacterized LOC100911553	0.852159	0.787348	1.79208	0.103892	0.27852	-4.56774
102557195	LOC102557195	uncharacterized LOC102557195	1.28988	0.103126	1.79193	0.103917	0.27852	-4.56795
309457	Pcgf6	polycomb group ring finger 6	1.02599	-0.277969	1.79036	0.104182	0.278999	-4.5701
362346	Prss37	serine protease 37	0.956591	0.647759	1.79024	0.104203	0.278999	-4.57026
100912188	LOC100912188	uncharacterized LOC100912188	0.965868	0.81163	1.79013	0.10422	0.278999	-4.57041
85490	Col5a1	collagen type V alpha 1 chain	0.947886	0.197821	1.79001	0.104241	0.279001	-4.57057
691668	Gzmn	granzyme N	0.916205	0.52857	1.7898	0.104275	0.27904	-4.57085
60566	Syt8	synaptotagmin 8	1.07218	-0.579692	1.78791	0.104596	0.279499	-4.57344
114095	Stxbp3	syntaxin binding protein 3	0.840377	-0.0538856	1.78796	0.104587	0.279499	-4.57337
311855	RGD1305178	similar to Hypothetical protein MGC11690	1.07234	-0.387644	1.78819	0.104548	0.279499	-4.57306
246258	Slc45a1	solute carrier family 45, member 1	0.817403	-0.928304	1.78696	0.104756	0.279814	-4.57474
59293	Rgs19	regulator of G-protein signaling 19	1.21644	0.301702	1.78647	0.10484	0.279899	-4.57542
295543	Pigk	phosphatidylinositol glycan anchor biosynthesis, class K	1.13698	-0.626693	1.78638	0.104855	0.279899	-4.57554
83469	Lrp4	LDL receptor related protein 4	0.879223	0.125561	1.78626	0.104875	0.279899	-4.5757
306759	Spock1	sparc/osteonectin, cwcv and kazal like domains proteoglycan 1	1.05612	0.0494752	1.78542	0.105018	0.280173	-4.57685
500981	Zfp202	zinc finger protein 202	1.13997	-0.180985	1.78516	0.105063	0.280187	-4.57721
308511	Chst8	carbohydrate sulfotransferase 8	1.36031	-0.00598112	1.78284	0.105457	0.280972	-4.58037
308850	Klhl35	kelch-like family member 35	1.04473	0.366042	1.78307	0.105418	0.280972	-4.58006
499747	Cysrt1	cysteine rich tail 1	1.21084	-0.798032	1.78288	0.10545	0.280972	-4.58032
361735	Ms4a6a	membrane spanning 4-domains A6A	1.11213	-0.456701	1.78269	0.105484	0.28099	-4.58059
78959	Akr1a1	aldo-keto reductase family 1 member A1	1.13788	-0.43289	1.77833	0.106229	0.282548	-4.58653
408240	Mcpt8l2	mast cell protease 8-like 2	0.982133	0.160236	1.77789	0.106305	0.282644	-4.58714
361375	Heatr3	HEAT repeat containing 3	1.16477	0.0310841	1.77684	0.106486	0.282979	-4.58857
498545	Tsc22d1	TSC22 domain family, member 1	1.10317	-0.306427	1.77643	0.106557	0.283032	-4.58913
306009	Slc39a14	solute carrier family 39 member 14	0.968684	-0.185999	1.77589	0.106649	0.28313	-4.58986
192215	Slc9a5	solute carrier family 9 member A5	1.16678	-0.428488	1.77519	0.106771	0.2833	-4.59082
171061	Mrpl17	mitochondrial ribosomal protein L17	1.20457	-0.335113	1.77474	0.106848	0.283336	-4.59143
297428	Copg1	coatomer protein complex, subunit gamma 1	1.63545	-0.0662497	1.77393	0.106987	0.28343	-4.59253
304794	Rbbp5	RB binding protein 5, histone lysine methyltransferase complex subunit	0.986681	0.13467	1.77384	0.107004	0.28343	-4.59266
362443	Klrb1a	killer cell lectin-like receptor subfamily B, member 1A	1.01788	-0.729765	1.774	0.106977	0.28343	-4.59245
305886	Slc22a17	solute carrier family 22, member 17	0.97566	0.724859	1.77363	0.10704	0.283471	-4.59294
25756	Cpt1b	carnitine palmitoyltransferase 1B	1.09459	0.122098	1.77267	0.107206	0.283773	-4.59425
290501	Tmtc4	transmembrane and tetratricopeptide repeat containing 4	0.775105	-0.700973	1.77243	0.107247	0.283781	-4.59458
29501	Slc12a4	solute carrier family 12 member 4	1.19441	0.521043	1.77169	0.107377	0.283989	-4.5956
24657	Prl6a1	prolactin family 6, subfamily a, member 1	0.870435	-0.137868	1.77057	0.10757	0.28434	-4.59711
25080	Apoa4	apolipoprotein A4	1.05285	-0.043873	1.76975	0.107713	0.284489	-4.59823
312927	Rb1cc1	RB1-inducible coiled-coil 1	1.34063	0.228858	1.76943	0.107768	0.284489	-4.59866
100909739	LOC100909739	uncharacterized LOC100909739	1.06503	0.543587	1.76767	0.108075	0.285139	-4.60106
311236	Lrrc4c	leucine rich repeat containing 4C	1.32279	0.0105323	1.76647	0.108286	0.285534	-4.6027
24883	Wt1	Wilms tumor 1	0.777901	-1.1046	1.76623	0.108327	0.28559	-4.60302
298018	Fam206a	family with sequence similarity 206, member A	0.927069	-0.0253167	1.7659	0.108385	0.285664	-4.60347
64366	Calu	calumenin	1.12907	0.442554	1.76456	0.10862	0.2862	-4.6053
300075	Tomm22	translocase of outer mitochondrial membrane 22	0.990132	-0.984801	1.76256	0.10897	0.286961	-4.60801
25696	Vldlr	very low density lipoprotein receptor	1.3135	-0.198441	1.76233	0.109012	0.287018	-4.60833
685867	Myl6	myosin light chain 6	1.18669	-0.114272	1.76153	0.109152	0.28728	-4.60941
60583	Ivl	involucrin	1.34752	-0.472009	1.76107	0.109233	0.287386	-4.61004
312664	Rasgef1a	RasGEF domain family, member 1A	1.1133	0.256329	1.7609	0.109262	0.287409	-4.61026
300032	Zc3h3	zinc finger CCCH type containing 3	1.29366	0.000576921	1.76023	0.109381	0.287668	-4.61118
24681	Prkcg	protein kinase C, gamma	1.00085	0.458324	1.76	0.109421	0.287718	-4.61148
313782	Fbxl12	F-box and leucine-rich repeat protein 12	1.1244	-0.10136	1.75924	0.109555	0.287963	-4.61252
24232	C3	complement C3	1.02489	-0.328025	1.75776	0.109818	0.288421	-4.61453
363071	Stra6	stimulated by retinoic acid 6	0.823259	-0.822758	1.7573	0.109899	0.288544	-4.61515
360584	Ggnbp2	gametogenetin binding protein 2	0.814713	0.422642	1.75673	0.11	0.288756	-4.61593
24264	Ckb	creatine kinase B	1.50283	-0.0923511	1.75577	0.11017	0.28912	-4.61723
25503	Ocm2	oncomodulin 2	0.954287	0.198814	1.75351	0.110573	0.289613	-4.6203
310641	Trim46	tripartite motif-containing 46	1.07541	-1.0378	1.7535	0.110574	0.289613	-4.6203
81784	Ssr3	signal sequence receptor subunit 3	0.944588	0.358464	1.75276	0.110707	0.289801	-4.62132
290317	Sox7	SRY box 7	1.38275	-0.16292	1.7501	0.111182	0.290611	-4.62492
299270	Serpina6	serpin family A member 6	1.03999	0.189779	1.75014	0.111175	0.290611	-4.62486
362955	Nol12	nucleolar protein 12	0.983573	-0.037153	1.75025	0.111154	0.290611	-4.62471
307236	Adnp2	ADNP homeobox 2	0.937346	0.256464	1.74842	0.111483	0.290621	-4.62719
315670	Elmod1	ELMO domain containing 1	0.935935	0.153591	1.74905	0.11137	0.290621	-4.62634
499951	Gata5	GATA binding protein 5	1.39042	-0.095102	1.74908	0.111364	0.290621	-4.62629
103690870	LOC103690870	uncharacterized LOC103690870	1.16864	-0.0927997	1.74816	0.111529	0.290621	-4.62753
25717	Tgfb3	transforming growth factor, beta 3	0.846619	0.945713	1.74757	0.111636	0.290824	-4.62834
290657	Klhl26	kelch-like family member 26	0.931253	-0.720891	1.74495	0.112107	0.291672	-4.63188
288916	Gadd45gip1	GADD45G interacting protein 1	0.90047	-0.573126	1.74305	0.112451	0.292407	-4.63446
25605	Hcrtr2	hypocretin receptor 2	0.907786	-0.413741	1.74282	0.112493	0.29246	-4.63477
100362418	LOC100362418	killer cell lectin-like receptor subfamily B member 1C	0.800512	-0.0816847	1.74226	0.112594	0.292616	-4.63552
362240	Nol4l	nucleolar protein 4-like	0.954193	-0.16663	1.7412	0.112786	0.292952	-4.63695
497840	Cps1	carbamoyl-phosphate synthase 1	1.13194	-0.402502	1.74103	0.112816	0.292977	-4.63718
302884	MGC105649	hypothetical LOC302884	1.103	-0.805554	1.74084	0.112851	0.293011	-4.63743
362672	Lrrc47	leucine rich repeat containing 47	0.9165	-0.619894	1.73729	0.113497	0.294526	-4.64223
25548	Slc34a1	solute carrier family 34 member 1	1.3743	-0.309919	1.73626	0.113685	0.294726	-4.64362
313557	Hivep3	human immunodeficiency virus type I enhancer binding protein 3	0.965193	-0.816152	1.7362	0.113696	0.294726	-4.6437
363219	Mitd1	microtubule interacting and trafficking domain containing 1	1.03682	1.07004	1.73607	0.11372	0.294726	-4.64387
366894	Trhde	thyrotropin-releasing hormone degrading enzyme	1.10984	0.452021	1.73607	0.113721	0.294726	-4.64388
360743	Med15	mediator complex subunit 15	1.29298	0.205294	1.73582	0.113765	0.294788	-4.64421
100360417	Rusc1	RUN and SH3 domain containing 1	0.889194	-0.672026	1.73507	0.113902	0.295034	-4.64522
24380	Gad2	glutamate decarboxylase 2	0.995547	-0.64852	1.73368	0.114158	0.295479	-4.6471
81830	Rab11a	RAB11a, member RAS oncogene family	0.801148	-0.486863	1.73295	0.114292	0.295771	-4.64808
360871	Mpzl1	myelin protein zero-like 1	0.797292	-0.664842	1.73057	0.114729	0.296454	-4.65128
140935	Afap1	actin filament associated protein 1	1.00827	0.634649	1.7298	0.114872	0.296533	-4.65233
293454	Ubfd1	ubiquitin family domain containing 1	1.29293	0.124339	1.72916	0.11499	0.296676	-4.65319
362156	Zdhhc5	zinc finger, DHHC-type containing 5	1.03076	0.567159	1.72803	0.115198	0.29686	-4.6547
680609	Ebi3	Epstein-Barr virus induced 3	1.12468	-0.36447	1.72657	0.115468	0.297229	-4.65667
295674	Plekha3	pleckstrin homology domain containing A3	0.793641	0.702048	1.72576	0.115618	0.297234	-4.65775
300713	Slc35f2	solute carrier family 35, member F2	1.0522	0.110969	1.72615	0.115547	0.297234	-4.65724
362103	Ntmt1	N-terminal Xaa-Pro-Lys N-methyltransferase 1	1.12765	0.118377	1.72605	0.115565	0.297234	-4.65737
100359478	Tstd1	thiosulfate sulfurtransferase like domain containing 1	1.00448	-0.0402124	1.72583	0.115607	0.297234	-4.65767
100361928	Tmem198	transmembrane protein 198	0.911253	0.145435	1.72644	0.115493	0.297234	-4.65685
361352	Pqlc1	PQ loop repeat containing 1	0.984484	-0.288958	1.72512	0.115737	0.297431	-4.65862
304928	Mettl18	methyltransferase like 18	0.774057	-0.753387	1.72493	0.115773	0.297469	-4.65887
64076	Slc26a1	solute carrier family 26 member 1	0.928663	0.173545	1.72271	0.116186	0.297959	-4.66186
291031	Fam8a1	family with sequence similarity 8, member A1	0.882557	-0.516615	1.72266	0.116196	0.297959	-4.66193
171096	Cst6	cystatin E/M	0.807392	0.710357	1.7218	0.116355	0.298202	-4.66308
298975	Scin	scinderin	0.979531	-0.347567	1.72123	0.116462	0.298314	-4.66385
56826	Adap2	ArfGAP with dual PH domains 2	1.39209	-0.0706788	1.71902	0.116876	0.298884	-4.66682
316524	Zfp142	zinc finger protein 142	0.952656	0.61763	1.71946	0.116793	0.298884	-4.66622
24822	Tmbim6	transmembrane BAX inhibitor motif containing 6	1.08746	-0.460858	1.71729	0.117201	0.299226	-4.66914
114839	Ccnc	cyclin C	0.831548	-0.476399	1.71737	0.117186	0.299226	-4.66903
308959	Usp31	ubiquitin specific peptidase 31	1.0022	0.431069	1.71738	0.117184	0.299226	-4.66902
312159	Fam3c	family with sequence similarity 3, member C	0.951723	-0.231142	1.71753	0.117156	0.299226	-4.66882
500377	Tuba8	tubulin, alpha 8	1.39961	0.297684	1.71701	0.117253	0.299283	-4.66951
499671	Lysmd1	LysM domain containing 1	0.880869	0.0648214	1.71631	0.117384	0.299422	-4.67045
306657	Irx2	iroquois homeobox 2	1.00206	0.297937	1.71489	0.117652	0.299833	-4.67236
309629	Pfdn6	prefoldin subunit 6	0.897864	-0.93248	1.71494	0.117643	0.299833	-4.67229
note. The table was sorted by the ascending order of q-value. The values were rounded up to three decimal place.
1 LogFC, estimate of the log2-fold-change corresponding to the effect
2 AveExpr, average expression for the genes over all samples
3 t-value, moderated t-statistic
4 p-value, raw p-value
5 q-value, adjusted p-value by multi-testing
6 Log-odd, log-odds that the gene is differentially expressed

## Sheet: TableS2_DwReg_TGFb1_vs_Veh
Supplementary Table 2. List of 3,552 genes down-regulated in TGFβ1 compared to Vehicle-treated A7r5 cells
EntrezGeneID	Symbol	Description	LogFC1	AveExpr2	t-value3	p-value4	q-value5	Log-odd6
24311	Ddc	dopa decarboxylase	-1.87042	-0.113573	-4.01299	0.00255149	0.0556973	-1.25585
24326	Ednra	endothelin receptor type A	-1.92015	-0.118311	-3.99663	0.00261895	0.0556973	-1.27926
24483	Igf2	insulin-like growth factor 2	-1.91839	0.28771	-4.26029	0.00172712	0.0556973	-0.907029
24508	Irf1	interferon regulatory factor 1	-1.86145	-0.123423	-4.1194	0.00215494	0.0556973	-1.10457
24534	Ldhb	lactate dehydrogenase B	-2.02092	-0.0813527	-4.65948	0.000936495	0.0556973	-0.365236
24584	Mylpf	myosin light chain, phosphorylatable, fast skeletal muscle	-2.06285	0.280246	-4.19586	0.00191043	0.0556973	-0.996975
24679	Prkar2b	protein kinase cAMP-dependent type 2 regulatory subunit beta	-2.02405	-0.135722	-4.41136	0.00136643	0.0556973	-0.698825
24834	Tk1	thymidine kinase 1	-2.03642	-0.17277	-4.48981	0.00121143	0.0556973	-0.592208
24838	Tnnt3	troponin T3, fast skeletal type	-1.89758	0.125816	-3.97925	0.0026927	0.0556973	-1.30418
24854	Clu	clusterin	-1.85135	-0.060518	-4.2056	0.00188146	0.0556973	-0.983338
25118	Itga1	integrin subunit alpha 1	-1.98971	0.731036	-4.14933	0.00205551	0.0556973	-1.06234
25205	Il6st	interleukin 6 signal transducer	-1.93432	-0.0229016	-4.43812	0.00131131	0.0556973	-0.662334
25230	Add3	adducin 3	-2.11371	-0.0431872	-4.36722	0.00146274	0.0556973	-0.759258
25240	Aqp1	aquaporin 1	-2.47899	0.250048	-5.54933	0.000259754	0.0556973	0.74188
25243	Arnt2	aryl hydrocarbon receptor nuclear translocator 2	-2.26426	0.00751963	-5.13274	0.000466838	0.0556973	0.241106
25249	Coq7	coenzyme Q7, hydroxylase	-2.16715	-0.128933	-4.91374	0.000641705	0.0556973	-0.034542
25250	Cox8b	cytochrome c oxidase, subunit VIIIb	-2.12442	0.0850187	-4.35634	0.00148758	0.0556973	-0.774214
25285	Igfbp5	insulin-like growth factor binding protein 5	-2.03909	-0.248177	-4.46603	0.00125633	0.0556973	-0.62441
25336	Nfyb	nuclear transcription factor Y subunit beta	-2.25794	0.176223	-4.10792	0.00219441	0.0556973	-1.12081
25339	Npr3	natriuretic peptide receptor 3	-2.07878	-0.0315967	-4.535	0.0011307	0.0556973	-0.531267
25364	Asic2	acid sensing ion channel subunit 2	-1.95244	0.325472	-4.12917	0.00212195	0.0556973	-1.09078
25374	Alad	aminolevulinate dehydratase	-1.94996	0.0885252	-4.43979	0.00130795	0.0556973	-0.66006
25460	Hmmr	hyaluronan-mediated motility receptor	-2.30412	0.0439827	-4.49753	0.00119722	0.0556973	-0.581776
25493	Nfkbia	NFKB inhibitor alpha	-1.73668	-0.143661	-4.02547	0.00250123	0.0556973	-1.23801
25515	Plk1	polo-like kinase 1	-2.20198	-0.157264	-4.58325	0.00105078	0.0556973	-0.466596
25565	Tle4	TLE family member 4, transcriptional corepressor	-1.85149	0.162351	-4.26897	0.0017039	0.0556973	-0.894973
25591	Parp1	poly (ADP-ribose) polymerase 1	-1.96378	-0.238977	-4.30475	0.00161153	0.0556973	-0.845362
25631	Smad3	SMAD family member 3	-2.25607	-0.128066	-4.97483	0.000586801	0.0556973	0.0432105
25634	G6pc	glucose-6-phosphatase, catalytic subunit	-2.17177	0.0893446	-4.10781	0.00219481	0.0556973	-1.12097
25672	Nr3c2	nuclear receptor subfamily 3, group C, member 2	-2.00143	0.180078	-4.62086	0.000992643	0.0556973	-0.416457
25729	Ccne1	cyclin E1	-1.81721	0.100183	-4.17664	0.00196901	0.0556973	-1.02393
25744	Nf2	neurofibromin 2	-1.82069	-0.00255917	-3.98058	0.00268697	0.0556973	-1.30227
29143	Grn	granulin precursor	-2.07741	0.212001	-4.11237	0.00217902	0.0556973	-1.11451
29148	Myog	myogenin	-2.08217	0.240949	-4.77663	0.00078589	0.0556973	-0.21145
29183	Areg	amphiregulin	-1.9986	0.0521315	-4.41915	0.00135012	0.0556973	-0.688179
29227	Nfib	nuclear factor I/B	-1.91546	0.120039	-4.43948	0.00130858	0.0556973	-0.660489
29265	Mcpt1	mast cell protease 1	-2.33765	0.517307	-5.01902	0.000550225	0.0556973	0.0990345
29365	Mpdz	multiple PDZ domain crumbs cell polarity complex component	-1.85499	-0.073586	-4.08445	0.00227749	0.0556973	-1.15406
29368	Fgf17	fibroblast growth factor 17	-2.11521	0.0834291	-4.17367	0.00197823	0.0556973	-1.02811
29376	Irs2	insulin receptor substrate 2	-1.98725	0.452298	-4.26835	0.00170553	0.0556973	-0.895825
29389	Tnni2	troponin I2, fast skeletal type	-2.16318	0.240049	-4.68045	0.000907438	0.0556973	-0.337539
29433	Pak3	p21 (RAC1) activated kinase 3	-1.80417	0.441451	-3.98306	0.00267636	0.0556973	-1.29871
29633	Ndst1	N-deacetylase and N-sulfotransferase 1	-2.17727	0.561847	-4.21277	0.00186042	0.0556973	-0.973304
29722	Apbb1	amyloid beta precursor protein binding family B member 1	-1.90299	-0.0815871	-4.30508	0.00161071	0.0556973	-0.844907
50558	Npepps	aminopeptidase puromycin sensitive	-1.84929	0.628872	-4.09856	0.00222716	0.0556973	-1.13406
50938	Cdon	cell adhesion associated, oncogene regulated	-2.06816	0.0270867	-4.74361	0.000825547	0.0556973	-0.254561
54190	Rabep1	rabaptin, RAB GTPase binding effector protein 1	-2.43984	-0.157358	-4.6635	0.000930849	0.0556973	-0.35992
54232	Car3	carbonic anhydrase 3	-2.0398	-0.0102778	-4.5227	0.0011521	0.0556973	-0.547826
54238	Cdkn2c	cyclin-dependent kinase inhibitor 2C	-2.28118	0.0731317	-5.11344	0.000479983	0.0556973	0.217151
58952	Cpq	carboxypeptidase Q	-1.98843	-0.026898	-4.56579	0.00107898	0.0556973	-0.489948
60324	Synpo	synaptopodin	-2.2956	0.142561	-5.22248	0.000410598	0.0556973	0.351582
60427	Kitlg	KIT ligand	-2.01799	-0.0752138	-4.59427	0.00103339	0.0556973	-0.451886
60586	Clcn4	chloride voltage-gated channel 4	-1.84401	-0.343487	-4.24742	0.0017622	0.0556973	-0.924943
63996	Smc1a	structural maintenance of chromosomes 1A	-1.98142	0.204269	-4.18478	0.00194396	0.0556973	-1.0125
64022	Btc	betacellulin	-2.22405	-0.0298068	-4.69664	0.000885646	0.0556973	-0.316194
64045	Glrx	glutaredoxin	-1.99727	-0.405712	-4.20603	0.00188019	0.0556973	-0.982738
64300	Mthfd1	methylenetetrahydrofolate dehydrogenase, cyclohydrolase and formyltetrahydrofolate synthetase 1	-2.05367	0.210046	-4.20771	0.00187524	0.0556973	-0.980386
64365	Tcn2	transcobalamin 2	-2.11327	-0.449176	-4.03369	0.00246873	0.0556973	-1.22629
64515	Cdc20	cell division cycle 20	-2.17025	0.0650879	-4.05534	0.00238518	0.0556973	-1.19544
64558	Fzd4	frizzled class receptor 4	-2.20745	-0.0703081	-4.86137	0.000693135	0.0556973	-0.101718
64627	Hist1h4b	histone cluster 1 H4 family member B	-2.6464	0.261532	-4.90901	0.000646174	0.0556973	-0.0405833
64709	Nucks1	nuclear casein kinase and cyclin-dependent kinase substrate 1	-2.25546	-0.22013	-3.99381	0.00263076	0.0556973	-1.28329
79128	Dab2	DAB2, clathrin adaptor protein	-1.76002	0.186673	-4.02083	0.00251979	0.0556973	-1.24464
79208	Epha5	EPH receptor A5	-2.31711	-0.0235845	-4.77477	0.000788077	0.0556973	-0.213883
79433	Myh10	myosin heavy chain 10	-2.19129	0.21641	-4.64614	0.000955499	0.0556973	-0.3829
81008	Itga7	integrin subunit alpha 7	-2.09413	0.509334	-4.81626	0.000740969	0.0556973	-0.159979
81528	Ogg1	8-oxoguanine DNA glycosylase	-2.14908	-0.0780017	-4.14102	0.00208264	0.0556973	-1.07406
81675	Gyg1	glycogenin 1	-1.75758	-0.0638888	-4.05861	0.0023728	0.0556973	-1.19078
81709	Msh2	mutS homolog 2	-2.14279	0.125442	-4.28709	0.00165643	0.0556973	-0.869812
81743	Pde2a	phosphodiesterase 2A	-1.85565	0.737887	-4.18161	0.00195367	0.0556973	-1.01695
81747	Pi4kb	phosphatidylinositol 4-kinase beta	-1.90977	-0.602577	-3.95724	0.00278923	0.0556973	-1.33579
81810	Tgfbr2	transforming growth factor, beta receptor 2	-1.96821	0.0994003	-4.57781	0.00105948	0.0556973	-0.473866
83508	Timeless	timeless circadian regulator	-1.84571	0.13438	-4.0959	0.00223658	0.0556973	-1.13784
83571	Cdkn1b	cyclin-dependent kinase inhibitor 1B	-1.88801	0.171789	-4.03846	0.00245006	0.0556973	-1.21949
83626	Ugcg	UDP-glucose ceramide glucosyltransferase	-1.99472	0.521921	-4.13251	0.00211078	0.0556973	-1.08606
83629	Slc12a2	solute carrier family 12 member 2	-1.72014	0.0382771	-3.99706	0.00261716	0.0556973	-1.27864
83708	Mybph	myosin binding protein H	-2.09607	0.535253	-4.47492	0.00123934	0.0556973	-0.612358
83820	Sycp2	synaptonemal complex protein 2	-2.16686	0.0533147	-4.24859	0.00175899	0.0556973	-0.92332
83836	Nde1	nudE neurodevelopment protein 1	-1.94059	-0.0848581	-4.0962	0.0022355	0.0556973	-1.13741
83840	Rps6kb1	ribosomal protein S6 kinase B1	-1.82689	0.380171	-3.97797	0.00269822	0.0556973	-1.30602
84350	Dnmt1	DNA methyltransferase 1	-2.13404	0.256751	-4.00891	0.00256815	0.0556973	-1.26169
84393	Kif4a	kinesin family member 4A	-2.11159	0.0108082	-4.08457	0.00227707	0.0556973	-1.1539
84472	Ilf3	interleukin enhancer binding factor 3	-2.12405	-0.298837	-4.60735	0.00101313	0.0556973	-0.434447
84484	Slc4a4	solute carrier family 4 member 4	-2.00609	-0.320097	-4.51172	0.00117155	0.0556973	-0.562615
84489	Fgfr3	fibroblast growth factor receptor 3	-1.91825	0.572995	-4.24429	0.00177085	0.0556973	-0.92931
85241	Pola1	DNA polymerase alpha 1, catalytic subunit	-2.13605	0.0683953	-4.04485	0.00242529	0.0556973	-1.21038
85252	Xpo1	exportin 1	-1.88525	-0.652992	-4.22588	0.0018226	0.0556973	-0.954986
113929	Nup88	nucleoporin 88	-1.78492	-0.395616	-4.00389	0.00258879	0.0556973	-1.26887
113984	Nr2f2	nuclear receptor subfamily 2, group F, member 2	-1.81401	0.199949	-4.09136	0.00225271	0.0556973	-1.14427
114089	Inpp5e	inositol polyphosphate-5-phosphatase E	-2.14938	0.0711686	-4.2438	0.00177219	0.0556973	-0.929982
114108	Pdlim3	PDZ and LIM domain 3	-2.05971	0.409624	-4.16625	0.00200146	0.0556973	-1.03854
114212	Chek2	checkpoint kinase 2	-1.93783	0.0904172	-3.97263	0.00272134	0.0556973	-1.31367
114216	S100a3	S100 calcium binding protein A3	-2.01057	0.112784	-4.14743	0.00206169	0.0556973	-1.06502
114507	Slc5a3	solute carrier family 5 member 3	-2.27065	0.239199	-4.24003	0.00178267	0.0556973	-0.935237
116467	Tm4sf4	transmembrane 4 L six family member 4	-1.78882	-0.502151	-4.0982	0.00222841	0.0556973	-1.13457
116548	Pcsk5	proprotein convertase subtilisin/kexin type 5	-2.21412	0.373355	-5.05435	0.000522734	0.0556973	0.143418
116555	Nup107	nucleoporin 107	-1.85333	0.334426	-4.08679	0.00226907	0.0556973	-1.15075
116654	Exoc4	exocyst complex component 4	-1.85784	0.0657161	-3.97383	0.00271611	0.0556973	-1.31195
116667	Map3k1	mitogen-activated protein kinase kinase kinase 1	-2.07159	0.0546657	-4.26459	0.00171557	0.0556973	-0.90105
116684	Oplah	5-oxoprolinase (ATP-hydrolysing)	-1.78674	0.300502	-3.9767	0.0027037	0.0556973	-1.30784
116777	Cdh3	cadherin 3	-2.44242	0.112552	-5.23617	0.000402672	0.0556973	0.368317
117020	Mcf2l	MCF.2 cell line derived transforming sequence-like	-1.76526	0.562787	-4.0483	0.00241201	0.0556973	-1.20546
117258	Cntn1	contactin 1	-1.803	-0.0186524	-4.01219	0.00255474	0.0556973	-1.25699
140583	Chek1	checkpoint kinase 1	-1.8933	0.0907226	-4.21802	0.00184517	0.0556973	-0.965965
140675	Gabra4	gamma-aminobutyric acid type A receptor alpha4 subunit	-2.5602	0.105241	-4.7591	0.000806684	0.0556973	-0.234313
140938	Psmc3ip	PSMC3 interacting protein	-2.00946	0.0185572	-4.32838	0.00155346	0.0556973	-0.812723
140939	Trim63	tripartite motif containing 63	-2.60279	0.152075	-5.71334	0.000207605	0.0556973	0.930629
170567	Slc38a1	solute carrier family 38, member 1	-1.92038	-0.122964	-4.01811	0.00253073	0.0556973	-1.24853
171010	Ppp1r14c	protein phosphatase 1, regulatory (inhibitor) subunit 14c	-2.16179	0.584869	-4.50961	0.00117533	0.0556973	-0.565464
171304	Kif11	kinesin family member 11	-2.15205	0.166875	-3.98132	0.00268377	0.0556973	-1.3012
171495	Capn5	calpain 5	-1.94585	-0.161909	-4.42218	0.00134384	0.0556973	-0.684045
171571	Grip2	glutamate receptor interacting protein 2	-2.35054	0.00737345	-4.61518	0.00100121	0.0556973	-0.42402
192226	Cand2	cullin-associated and neddylation-dissociated 2 (putative)	-2.12239	-0.0916301	-4.44435	0.00129881	0.0556973	-0.653852
192249	Ehd3	EH-domain containing 3	-1.84629	-0.243013	-4.28172	0.00167037	0.0556973	-0.877273
192269	Sub1	SUB1 homolog, transcriptional regulator	-1.76692	0.0629509	-4.01204	0.00255533	0.0556973	-1.2572
246212	Sipa1l1	signal-induced proliferation-associated 1 like 1	-2.02956	0.00636935	-4.64279	0.000960336	0.0556973	-0.387341
246254	Gpsm1	G-protein signaling modulator 1	-1.88816	0.151182	-4.24222	0.00177659	0.0556973	-0.932193
246776	Filip1	filamin A interacting protein 1	-2.38159	0.309256	-5.43968	0.000302372	0.0556973	0.613054
252915	Mxd3	Max dimerization protein 3	-2.20569	-0.0365269	-4.55979	0.00108887	0.0556973	-0.497995
252918	Spag5	sperm associated antigen 5	-2.12086	0.0090396	-4.00377	0.00258926	0.0556973	-1.26903
259241	Nr1d2	nuclear receptor subfamily 1, group D, member 2	-1.90767	-0.576175	-4.31178	0.00159402	0.0556973	-0.835641
266605	Dcps	decapping enzyme, scavenger	-1.88369	-0.516197	-4.3433	0.00151792	0.0556973	-0.792154
266670	Riox2	ribosomal oxygenase 2	-1.89947	0.0328466	-3.97192	0.00272443	0.0556973	-1.31469
282636	Impa2	inositol monophosphatase 2	-2.19251	-0.0706134	-5.03318	0.000539027	0.0556973	0.116847
282838	Gm2a	GM2 ganglioside activator	-1.98743	0.352764	-4.39522	0.00140085	0.0556973	-0.720888
286919	Cdk5rap2	CDK5 regulatory subunit associated protein 2	-2.23865	-0.126407	-4.80027	0.000758752	0.0556973	-0.180709
287042	Nubp1	nucleotide binding protein 1	-2.11576	0.434277	-4.53912	0.00112362	0.0556973	-0.525725
287146	Chtf18	chromosome transmission fidelity factor 18	-2.08685	0.0557394	-4.47662	0.00123612	0.0556973	-0.610059
287155	Stub1	STIP1 homology and U-box containing protein 1	-2.09611	-0.478253	-4.12791	0.00212617	0.0556973	-1.09255
287249	Cnot6	CCR4-NOT transcription complex, subunit 6	-2.18186	0.533917	-4.88867	0.000665798	0.0556973	-0.0666403
287361	Zfp496	zinc finger protein 496	-2.05903	-0.266649	-4.42954	0.00132871	0.0556973	-0.674014
287656	Mrpl45	mitochondrial ribosomal protein L45	-2.00171	-0.0637826	-4.66148	0.000933684	0.0556973	-0.362593
288003	Rfc4	replication factor C subunit 4	-2.08483	-0.294464	-4.17026	0.00198888	0.0556973	-1.0329
288176	Cmss1	cms1 ribosomal small subunit homolog	-1.81842	-0.814171	-4.0583	0.00237399	0.0556973	-1.19123
288242	Chaf1b	chromatin assembly factor 1 subunit B	-1.87427	0.106587	-4.24072	0.00178076	0.0556973	-0.934283
288414	Rfc3	replication factor C subunit 3	-2.00041	-0.104092	-4.27359	0.00169166	0.0556973	-0.888553
288532	Mcm7	minichromosome maintenance complex component 7	-1.99901	0.328572	-4.32619	0.00155875	0.0556973	-0.815742
289382	Ints7	integrator complex subunit 7	-1.93955	0.24327	-4.31635	0.00158274	0.0556973	-0.829324
289734	Smtn	smoothelin	-2.16316	0.461538	-4.75189	0.000815399	0.0556973	-0.243725
289758	Pold2	DNA polymerase delta 2, accessory subunit	-2.07568	-0.0469929	-4.08832	0.00226359	0.0556973	-1.14858
289993	Cdkn3	cyclin-dependent kinase inhibitor 3	-2.22498	0.06735	-4.09293	0.00224712	0.0556973	-1.14205
290027	Parp2	poly (ADP-ribose) polymerase 2	-2.02668	-0.521401	-4.08912	0.00226071	0.0556973	-1.14744
290277	Cryl1	crystallin, lambda 1	-1.75358	-0.367154	-4.03841	0.00245024	0.0556973	-1.21955
290741	Dctd	dCMP deaminase	-1.9065	-0.0967075	-4.15893	0.00202467	0.0556973	-1.04884
290985	Isca1	iron-sulfur cluster assembly 1	-1.99025	-0.164166	-4.09316	0.0022463	0.0556973	-1.14172
291091	Serpinb1a	serpin family B member 1A	-1.88223	0.0567709	-4.06963	0.00233166	0.0556973	-1.17511
291314	Sephs1	selenophosphate synthetase 1	-2.2706	-0.10027	-4.03346	0.00246961	0.0556973	-1.22661
291441	Ska1	spindle and kinetochore associated complex subunit 1	-2.17031	0.0159408	-3.97885	0.00269442	0.0556973	-1.30475
291848	Mmp15	matrix metallopeptidase 15	-1.77939	0.275479	-3.98316	0.00267591	0.0556973	-1.29856
291874	Nup93	nucleoporin 93	-1.93566	0.0379383	-4.22065	0.00183758	0.0556973	-0.962287
292728	Cyp2b21	cytochrome P450, family 2, subfamily b, polypeptide 21	-1.91603	-0.503896	-4.42593	0.00133612	0.0556973	-0.678939
293098	Tmem135	transmembrane protein 135	-2.29127	0.290553	-4.32448	0.00156287	0.0556973	-0.818092
293774	Dtx4	deltex E3 ubiquitin ligase 4	-1.93069	-0.0873152	-4.47833	0.0012329	0.0556973	-0.607746
293947	Arhgap18	Rho GTPase activating protein 18	-2.06789	0.536184	-4.09911	0.00222521	0.0556973	-1.13328
294158	Olr1696	olfactory receptor 1696	-2.25456	-0.0977414	-4.17622	0.00197031	0.0556973	-1.02453
294508	Pald1	phosphatase domain containing, paladin 1	-2.15664	0.253701	-4.09697	0.00223277	0.0556973	-1.13631
294519	Cep57l1	centrosomal protein 57-like 1	-2.16577	-0.0728038	-4.22723	0.00181875	0.0556973	-0.953099
294565	Fam13c	family with sequence similarity 13, member C	-2.1438	-0.216106	-4.70326	0.000876906	0.0556973	-0.307489
294674	Enc1	ectodermal-neural cortex 1	-2.01324	-0.285952	-4.6434	0.000959455	0.0556973	-0.386533
294754	Pelo	pelota mRNA surveillance and ribosome rescue factor	-2.01399	0.120746	-4.30501	0.00161087	0.0556973	-0.844998
295050	Exosc8	exosome component 8	-2.06836	-0.328149	-4.60517	0.00101648	0.0556973	-0.437351
295053	Spart	spartin	-1.87409	-0.173722	-4.19908	0.0019008	0.0556973	-0.992463
295274	Hist2h2be	histone cluster 2 H2B family member E	-2.29362	0.454444	-4.47527	0.00123869	0.0556973	-0.611892
295323	Trim45	tripartite motif-containing 45	-2.2513	0.000302643	-4.21527	0.00185315	0.0556973	-0.969812
295458	Bdh2	3-hydroxybutyrate dehydrogenase 2	-1.95524	-0.655013	-4.4445	0.00129853	0.0556973	-0.653659
295568	Hltf	helicase-like transcription factor	-2.10969	0.206324	-4.70764	0.000871172	0.0556973	-0.301732
295602	Rif1	replication timing regulatory factor 1	-2.03477	0.453569	-4.10933	0.00218954	0.0556973	-1.11882
296200	Mgme1	mitochondrial genome maintenance exonuclease 1	-2.13259	-0.235951	-4.43717	0.00131323	0.0556973	-0.663633
296269	Angpt4	angiopoietin 4	-2.55177	0.452877	-5.19876	0.000424719	0.0556973	0.322525
296653	Phf19	PHD finger protein 19	-2.30057	-0.015133	-4.84507	0.000710026	0.0556973	-0.122726
297333	Smyd1	SET and MYND domain containing 1	-2.54075	0.366318	-4.49617	0.00119971	0.0556973	-0.583612
297758	Terf1	telomeric repeat binding factor 1	-2.29591	0.333903	-5.22732	0.000407776	0.0556973	0.357505
297998	Nudt2	nudix hydrolase 2	-2.01333	-0.204488	-4.22806	0.00181639	0.0556973	-0.951941
298429	Rad54l	RAD54 like	-2.27318	0.409454	-4.69703	0.000885129	0.0556973	-0.315682
298441	Nasp	nuclear autoantigenic sperm protein	-1.99884	0.130017	-4.00606	0.00257982	0.0556973	-1.26575
299147	Ppp2r5e	protein phosphatase 2 regulatory subunit B', epsilon	-2.00236	-0.125209	-3.99206	0.00263812	0.0556973	-1.2858
299706	Nup37	nucleoporin 37	-1.84508	-0.336172	-4.05026	0.00240449	0.0556973	-1.20266
299830	Lrig3	leucine-rich repeats and immunoglobulin-like domains 3	-2.24588	-0.174282	-4.28006	0.00167467	0.0556973	-0.879566
299905	Med30	mediator complex subunit 30	-1.97419	0.00671733	-4.03829	0.0024507	0.0556973	-1.21972
299933	Dscc1	DNA replication and sister chromatid cohesion 1	-2.16188	0.078468	-4.78726	0.000773563	0.0556973	-0.197617
299949	Tbc1d31	TBC1 domain family, member 31	-2.06691	-0.272993	-4.24967	0.00175601	0.0556973	-0.921811
300149	Ncaph2	non-SMC condensin II complex, subunit H2	-2.07876	-0.105397	-4.35707	0.0014859	0.0556973	-0.773212
300186	Amigo2	adhesion molecule with Ig like domain 2	-2.19897	0.211549	-3.96061	0.00277419	0.0556973	-1.33094
300219	Troap	trophinin associated protein	-2.25443	0.0269134	-4.20742	0.00187609	0.0556973	-0.980789
300711	Atm	ATM serine/threonine kinase	-2.59857	0.00299436	-5.02698	0.000543899	0.0556973	0.109054
300803	Lactb	lactamase, beta	-2.12677	0.255898	-4.49889	0.00119473	0.0556973	-0.579937
301121	Rfx2	regulatory factor X2	-2.0236	-0.141774	-4.39404	0.00140339	0.0556973	-0.722495
301131	Tnfaip8l1	TNF alpha induced protein 8 like 1	-2.1384	0.392657	-4.07379	0.00231632	0.0556973	-1.1692
301617	Pask	PAS domain containing serine/threonine kinase	-2.16613	0.226757	-4.57072	0.00107094	0.0556973	-0.483354
301701	Ndc80	NDC80 kinetochore complex component	-2.25236	-0.0439644	-4.43425	0.00131914	0.0556973	-0.667609
302492	Mbnl3	muscleblind-like splicing regulator 3	-2.04245	-0.0630097	-4.51577	0.00116434	0.0556973	-0.557162
302557	Pqbp1	polyglutamine binding protein 1	-1.96124	0.0384367	-4.40749	0.0013746	0.0556973	-0.70411
303275	Dhrs13	dehydrogenase/reductase 13	-1.79312	0.275451	-3.98897	0.00265119	0.0556973	-1.29023
303348	Atad5	ATPase family, AAA domain containing 5	-2.2192	0.456422	-4.39784	0.00139519	0.0556973	-0.717301
303378	Slfn13	schlafen family member 13	-1.97463	0.216863	-4.4509	0.00128583	0.0556973	-0.644955
303517	Tns4	tensin 4	-2.1605	-0.0716367	-4.41619	0.00135629	0.0556973	-0.692223
303602	Dcaf7	DDB1 and CUL4 associated factor 7	-2.06057	0.215424	-4.62329	0.000989011	0.0556973	-0.41323
303701	C1qtnf1	C1q and TNF related 1	-1.88228	0.033241	-3.99327	0.00263306	0.0556973	-1.28408
303790	Smpd4	sphingomyelin phosphodiesterase 4	-2.08598	-0.0297571	-4.18433	0.00194535	0.0556973	-1.01314
303824	Igf2bp2	insulin-like growth factor 2 mRNA binding protein 2	-2.06324	-0.0118944	-4.70974	0.000868428	0.0556973	-0.298964
304131	Map3k7cl	MAP3K7 C-terminal like	-2.17607	0.224553	-4.00137	0.0025992	0.0556973	-1.27247
304218	Pds5b	PDS5 cohesin associated factor B	-2.06005	0.0263744	-4.50244	0.00118827	0.0556973	-0.57514
304528	Rfc5	replication factor C subunit 5	-2.10946	0.16299	-4.49525	0.00120139	0.0556973	-0.584852
304608	Mmp19	matrix metallopeptidase 19	-1.79335	0.0521262	-4.04971	0.00240662	0.0556973	-1.20346
304761	Zranb3	zinc finger RANBP2-type containing 3	-2.02331	-0.0134855	-4.02108	0.00251879	0.0556973	-1.24429
304960	Olfml2b	olfactomedin-like 2B	-2.12159	0.0102623	-4.44842	0.00129074	0.0556973	-0.648328
305073	Dtl	denticleless E3 ubiquitin protein ligase homolog	-1.82909	0.202943	-4.18488	0.00194367	0.0556973	-1.01237
305471	Patz1	POZ (BTB) and AT hook containing zinc finger 1	-2.2075	-0.290815	-4.91677	0.000638851	0.0556973	-0.0306637
305472	Pik3ip1	phosphoinositide-3-kinase interacting protein 1	-2.07643	-0.410288	-4.56809	0.00107523	0.0556973	-0.486873
305556	Ehbp1	EH domain binding protein 1	-2.18924	0.256535	-5.03734	0.000535777	0.0556973	0.122084
305827	Wdhd1	WD repeat and HMG-box DNA binding protein 1	-2.09214	0.000533858	-4.11779	0.00216044	0.0556973	-1.10685
305851	Supt16h	SPT16 homolog, facilitates chromatin remodeling subunit	-1.99352	-0.366924	-4.09956	0.00222364	0.0556973	-1.13265
305938	Spata13	spermatogenesis associated 13	-1.93284	-0.124353	-4.4905	0.00121014	0.0556973	-0.591268
305967	Kif13b	kinesin family member 13B	-2.06937	0.229454	-4.28367	0.00166529	0.0556973	-0.874561
305972	Zfp395	zinc finger protein 395	-1.8395	-0.475396	-4.04068	0.00244141	0.0556973	-1.21632
305974	Scara5	scavenger receptor class A, member 5	-2.01377	-0.0705048	-4.66704	0.000925909	0.0556973	-0.355243
306375	Csgalnact1	chondroitin sulfate N-acetylgalactosaminyltransferase 1	-1.99587	0.287005	-4.38922	0.00141387	0.0556973	-0.7291
306564	Htra4	HtrA serine peptidase 4	-1.96808	0.0590174	-4.35059	0.00150088	0.0556973	-0.782119
306575	Ckap2	cytoskeleton associated protein 2	-2.24715	-0.0864077	-4.27766	0.00168095	0.0556973	-0.882895
306616	Myom2	myomesin 2	-2.12268	0.500048	-4.78339	0.000778025	0.0556973	-0.202648
306817	Dek	DEK proto-oncogene	-2.273	0.202859	-5.0301	0.000541442	0.0556973	0.112975
307667	Hmgxb4	HMG-box containing 4	-1.97629	0.179441	-4.13169	0.00211353	0.0556973	-1.08722
308004	Fam204a	family with sequence similarity 204, member A	-1.89841	0.227916	-4.09353	0.00224496	0.0556973	-1.14119
308113	Cnksr3	Cnksr family member 3	-1.95226	0.55481	-4.33348	0.00154122	0.0556973	-0.805688
308572	Myh14	myosin heavy chain 14	-2.06369	0.384586	-4.35245	0.00149656	0.0556973	-0.779562
308937	Wee1	WEE1 G2 checkpoint kinase	-2.03991	0.140477	-4.59103	0.00103846	0.0556973	-0.456198
308993	Sephs2	selenophosphate synthetase 2	-1.82164	0.0788258	-4.11986	0.00215338	0.0556973	-1.10392
309098	Tubgcp2	tubulin, gamma complex associated protein 2	-2.08554	-0.457628	-4.42558	0.00133684	0.0556973	-0.679422
309122	H19	H19, imprinted maternally expressed transcript (non-protein coding)	-2.04662	0.402411	-4.48102	0.00122783	0.0556973	-0.604105
309212	Ptgdr2	prostaglandin D2 receptor 2	-2.20634	-0.277318	-4.31135	0.00159508	0.0556973	-0.836234
309380	Loxl4	lysyl oxidase-like 4	-1.89727	0.818031	-4.27703	0.0016826	0.0556973	-0.883769
309451	Gbf1	golgi brefeldin A resistant guanine nucleotide exchange factor 1	-2.55924	0.236285	-4.89123	0.000663297	0.0556973	-0.0633612
309595	Mdc1	mediator of DNA damage checkpoint 1	-1.84651	0.128951	-4.17207	0.00198322	0.0556973	-1.03036
309651	Ppil1	peptidylprolyl isomerase like 1	-2.03497	0.0477651	-4.28432	0.0016636	0.0556973	-0.873662
310538	Fnip2	folliculin interacting protein 2	-2.23368	-0.0574623	-4.54288	0.00111722	0.0556973	-0.520678
310621	Iqgap3	IQ motif containing GTPase activating protein 3	-2.12434	0.182471	-4.00544	0.00258237	0.0556973	-1.26664
310658	Pogz	pogo transposable element derived with ZNF domain	-1.98935	0.10141	-3.97106	0.00272819	0.0556973	-1.31593
310681	Hjv	hemojuvelin BMP co-receptor	-1.86828	0.313234	-4.05104	0.00240151	0.0556973	-1.20155
310806	Cdc14a	cell division cycle 14A	-2.09666	-0.154031	-4.86309	0.000691379	0.0556973	-0.0995064
310880	Zgrf1	zinc finger, GRF-type containing 1	-2.16073	0.369736	-4.26302	0.00171978	0.0556973	-0.903236
311055	Tanc1	tetratricopeptide repeat, ankyrin repeat and coiled-coil containing 1	-2.18746	-0.175906	-4.92634	0.000629946	0.0556973	-0.0184485
311336	Nusap1	nucleolar and spindle associated protein 1	-2.20904	0.00211699	-3.95716	0.00278955	0.0556973	-1.3359
311633	Neurl2	neuralized E3 ubiquitin protein ligase 2	-2.16987	-0.521939	-3.99124	0.00264161	0.0556973	-1.28699
311742	Cdca7	cell division cycle associated 7	-1.86986	0.0781722	-4.24884	0.00175828	0.0556973	-0.922961
312113	Stard8	StAR-related lipid transfer domain containing 8	-2.36828	0.165999	-4.69855	0.000883116	0.0556973	-0.313682
312200	Tmem209	transmembrane protein 209	-1.90183	-0.214838	-4.06808	0.00233742	0.0556973	-1.17732
312444	Immt	inner membrane mitochondrial protein	-1.96549	0.245722	-4.02136	0.00251766	0.0556973	-1.24388
312538	Mcm2	minichromosome maintenance complex component 2	-2.11878	0.0305545	-4.67542	0.00091432	0.0556973	-0.344176
312562	Rbsn	rabenosyn, RAB effector	-2.23886	-0.0793089	-4.00705	0.00257575	0.0556973	-1.26434
312574	Lrig1	leucine-rich repeats and immunoglobulin-like domains 1	-2.37098	0.136362	-5.28726	0.000374522	0.0556973	0.430452
312677	Ccdc77	coiled-coil domain containing 77	-2.08957	0.0354439	-4.47029	0.00124816	0.0556973	-0.618631
312728	Tspan9	tetraspanin 9	-1.88099	0.202133	-4.04384	0.00242917	0.0556973	-1.21181
312787	Gpr19	G protein-coupled receptor 19	-2.0886	0.155281	-4.16273	0.00201259	0.0556973	-1.04349
312913	Cpa6	carboxypeptidase A6	-1.92587	-0.0854645	-4.17816	0.00196432	0.0556973	-1.02181
312981	Asph	aspartate-beta-hydroxylase	-1.72417	-0.0258209	-3.95591	0.00279514	0.0556973	-1.3377
313049	Zbtb8a	zinc finger and BTB domain containing 8a	-2.24177	-0.0743292	-4.25962	0.00172894	0.0556973	-0.907969
313210	Abca1	ATP binding cassette subfamily A member 1	-1.93617	-0.0474976	-4.02302	0.00251101	0.0556973	-1.24151
313304	Stag2	stromal antigen 2	-2.33569	0.0718168	-5.31695	0.000359142	0.0556973	0.466335
313506	Stil	STIL, centriolar assembly protein	-2.18846	0.296984	-4.18983	0.00192862	0.0556973	-1.00543
313583	Sf3a3	splicing factor 3a, subunit 3	-1.96603	-0.685667	-4.36174	0.00147519	0.0556973	-0.766786
313672	Kazn	kazrin, periplakin interacting protein	-2.16412	0.633139	-4.79703	0.000762414	0.0556973	-0.184919
313689	Dhrs3	dehydrogenase/reductase 3	-2.17868	0.313674	-5.04979	0.000526195	0.0556973	0.137706
313843	Galm	galactose mutarotase	-2.04475	-0.531883	-4.47392	0.00124125	0.0556973	-0.61372
313866	Plekhh2	pleckstrin homology, MyTH4 and FERM domain containing H2	-2.0651	0.436431	-4.81203	0.000745635	0.0556973	-0.165465
313917	Abhd1	abhydrolase domain containing 1	-2.11326	0.352263	-4.76347	0.000801441	0.0556973	-0.228603
314306	Elmsan1	ELM2 and Myb/SANT domain containing 1	-2.46604	0.294827	-4.27383	0.00169101	0.0556973	-0.888211
314384	Rps6ka5	ribosomal protein S6 kinase A5	-1.78364	0.104276	-4.01725	0.00253423	0.0556973	-1.24976
314405	Otub2	OTU deubiquitinase, ubiquitin aldehyde binding 2	-2.07486	0.217409	-4.33878	0.00152858	0.0556973	-0.798373
314949	Rad21	RAD21 cohesin complex component	-2.22313	0.0156275	-4.14031	0.00208496	0.0556973	-1.07505
314961	Asap1	ArfGAP with SH3 domain, ankyrin repeat and PH domain 1	-2.21782	0.357242	-4.99124	0.000572925	0.0556973	0.0639793
314993	Atad2	ATPase family, AAA domain containing 2	-2.06876	0.490966	-4.24938	0.0017568	0.0556973	-0.922211
315039	Osr2	odd-skipped related transciption factor 2	-1.98588	-0.103342	-4.53972	0.00112261	0.0556973	-0.524927
315164	Cenpm	centromere protein M	-2.24355	0.0241176	-4.88194	0.000672433	0.0556973	-0.0752804
315326	Tns2	tensin 2	-1.9799	0.0249343	-4.54126	0.00111998	0.0556973	-0.522858
315330	Espl1	extra spindle pole bodies like 1, separase	-2.07174	0.249184	-4.07167	0.00232414	0.0556973	-1.17222
315663	Exph5	exophilin 5	-1.79991	-0.0537855	-3.98576	0.00266481	0.0556973	-1.29483
315689	Hmg20a	high mobility group 20A	-1.98724	0.0223297	-4.06177	0.00236095	0.0556973	-1.18629
315732	Uaca	uveal autoantigen with coiled-coil domains and ankyrin repeats	-1.92301	0.206511	-4.26354	0.00171838	0.0556973	-0.902511
315776	Tln2	talin 2	-2.26689	-0.14385	-5.15938	0.00044933	0.0556973	0.274049
315852	Ttk	Ttk protein kinase	-2.22824	0.0676509	-4.18153	0.00195391	0.0556973	-1.01706
315903	U2surp	U2 snRNP-associated SURP domain containing	-2.0808	0.413176	-4.52285	0.00115183	0.0556973	-0.547618
315969	Topbp1	DNA topoisomerase II binding protein 1	-2.10056	0.313788	-4.10172	0.00221606	0.0556973	-1.12959
316137	Adgre1	adhesion G protein-coupled receptor E1	-1.75478	-0.813875	-3.95692	0.00279065	0.0556973	-1.33625
316201	Daam2	dishevelled associated activator of morphogenesis 2	-2.21302	-0.103011	-4.74417	0.000824851	0.0556973	-0.253823
316273	Mcm3	minichromosome maintenance complex component 3	-2.07318	0.259326	-4.67023	0.000921477	0.0556973	-0.351027
316275	Paqr8	progestin and adipoQ receptor family member 8	-1.91813	-0.186006	-4.34194	0.00152113	0.0556973	-0.79403
316384	Cavin2	caveolae associated protein 2	-2.23609	-0.155565	-5.13777	0.00046348	0.0556973	0.247331
316539	Epha4	Eph receptor A4	-1.88563	-0.164381	-4.38892	0.00141452	0.0556973	-0.729504
316611	Agap1	ArfGAP with GTPase domain, ankyrin repeat and PH domain 1	-2.0657	-0.236316	-4.79565	0.000763984	0.0556973	-0.186718
316767	Ddx11	DEAD/H-box helicase 11	-2.21895	0.193501	-4.38778	0.00141701	0.0556973	-0.731065
317183	Pcdh19	protocadherin 19	-2.02017	-0.0637952	-4.68021	0.000907757	0.0556973	-0.337848
317435	Shroom2	shroom family member 2	-2.12143	-0.0635627	-4.60575	0.00101559	0.0556973	-0.436577
317439	Wwc3	WWC family member 3	-2.06868	0.0907516	-4.71539	0.000861117	0.0556973	-0.291547
360254	Brca2	BRCA2, DNA repair associated	-2.36495	0.0750324	-5.25902	0.000389814	0.0556973	0.396158
360457	Vegfd	vascular endothelial growth factor D	-2.28043	0.611273	-5.02742	0.000543551	0.0556973	0.109608
360468	Emp2	epithelial membrane protein 2	-1.91352	0.560026	-4.40914	0.00137109	0.0556973	-0.701848
360592	Trim37	tripartite motif-containing 37	-2.01437	-0.24878	-4.50178	0.00118946	0.0556973	-0.576025
360702	Ttc3	tetratricopeptide repeat domain 3	-2.25095	0.211376	-5.11848	0.000476513	0.0556973	0.223412
360757	Medag	mesenteric estrogen-dependent adipogenesis	-1.89725	0.057713	-4.2911	0.00164614	0.0556973	-0.864267
360849	Kif14	kinesin family member 14	-2.2317	0.0722639	-4.14114	0.00208224	0.0556973	-1.07389
360962	Tacc3	transforming, acidic coiled-coil containing protein 3	-2.25522	0.0899758	-4.07248	0.00232113	0.0556973	-1.17106
360993	Ppp4r3b	protein phosphatase 4, regulatory subunit 3B	-2.20028	-0.080193	-4.48439	0.0012215	0.0556973	-0.599532
361013	Ube2e2	ubiquitin-conjugating enzyme E2E 2	-1.87968	-0.269185	-4.16254	0.00201319	0.0556973	-1.04375
361056	Rnaseh2b	ribonuclease H2, subunit B	-1.9606	-0.313713	-4.19217	0.00192153	0.0556973	-1.00214
361064	R3hcc1	R3H domain and coiled-coil containing 1	-1.75704	-0.742487	-4.05511	0.00238604	0.0556973	-1.19576
361197	Ercc6l2	ERCC excision repair 6 like 2	-1.88107	0.223249	-3.96494	0.00275502	0.0556973	-1.32472
361206	Slc25a48	solute carrier family 25, member 48	-2.20856	0.144756	-4.76121	0.000804147	0.0556973	-0.231554
361256	Svil	supervillin	-1.79557	-0.200447	-4.05079	0.0024025	0.0556973	-1.20192
361308	Kif20a	kinesin family member 20A	-2.1513	-0.214763	-4.01315	0.00255082	0.0556973	-1.25562
361432	Cdh15	cadherin 15	-1.92136	0.159996	-4.42982	0.00132815	0.0556973	-0.673639
361435	Fanca	FA complementation group A	-2.03399	0.00619348	-4.00843	0.00257009	0.0556973	-1.26236
361601	Abhd17c	abhydrolase domain containing 17C	-1.8147	-0.202625	-4.00465	0.00258565	0.0556973	-1.26778
361624	Akip1	A-kinase interacting protein 1	-2.03563	0.249687	-4.15678	0.00203154	0.0556973	-1.05186
361628	Eif4g2	eukaryotic translation initiation factor 4, gamma 2	-2.08252	-0.105046	-4.56388	0.00108213	0.0556973	-0.492515
361650	Hirip3	HIRA interacting protein 3	-2.07081	-0.141348	-4.70137	0.000879386	0.0556973	-0.309968
361749	Il33	interleukin 33	-2.26717	-0.325432	-4.45822	0.00127146	0.0556973	-0.635004
361791	Nrm	nurim	-1.9656	0.0599077	-4.07962	0.00229501	0.0556973	-1.16093
361814	Srsf3	serine and arginine rich splicing factor 3	-2.13361	-0.4187	-4.59205	0.00103687	0.0556973	-0.454848
361833	Ank3	ankyrin 3	-2.02805	0.0618884	-4.55056	0.00110424	0.0556973	-0.510362
361856	Tube1	tubulin, epsilon 1	-2.3397	0.06061	-4.26765	0.00170741	0.0556973	-0.896804
361968	Tmem144	transmembrane protein 144	-2.53026	-0.062537	-4.3684	0.00146007	0.0556973	-0.757641
361999	Anp32e	acidic nuclear phosphoprotein 32 family member E	-2.0758	-0.250509	-4.60846	0.00101143	0.0556973	-0.432968
362044	Cenpe	centromere protein E	-2.28808	-0.0268915	-4.10457	0.00220608	0.0556973	-1.12555
362216	Mrps26	mitochondrial ribosomal protein S26	-2.05114	0.0191391	-4.05978	0.00236842	0.0556973	-1.18912
362320	Fam133b	family with sequence similarity 133, member B	-2.02808	0.193218	-4.62123	0.000992089	0.0556973	-0.415965
362417	Il17re	interleukin 17 receptor E	-2.11097	0.246931	-4.5899	0.00104024	0.0556973	-0.457713
362419	Tamm41	TAM41 mitochondrial translocator assembly and maintenance homolog	-2.02264	-0.507503	-4.01042	0.00256194	0.0556973	-1.25952
362438	Ncapd2	non-SMC condensin I complex, subunit D2	-2.50903	-0.0107056	-5.52184	0.000269796	0.0556973	0.709781
362461	C2cd5	C2 calcium-dependent domain containing 5	-2.10042	-0.155189	-4.21293	0.00185994	0.0556973	-0.973074
362489	Runx1t1	RUNX1 translocation partner 1	-1.77872	0.0477811	-4.1172	0.00216246	0.0556973	-1.10769
362535	Lurap1l	leucine rich adaptor protein 1-like	-1.94	-0.374247	-4.46897	0.00125069	0.0556973	-0.620427
362587	Macf1	microtubule-actin crosslinking factor 1	-1.94325	0.112295	-4.32023	0.00157323	0.0556973	-0.823964
362625	Man1c1	mannosidase, alpha, class 1C, member 1	-1.81231	0.244799	-4.11611	0.00216618	0.0556973	-1.10923
362667	Thap3	THAP domain containing 3	-1.86672	-0.284312	-4.20255	0.00189049	0.0556973	-0.987611
362732	Agmo	alkylglycerol monooxygenase	-2.17631	0.534689	-4.87485	0.000679487	0.0556973	-0.0843765
362779	Vrk1	VRK serine/threonine kinase 1	-2.24048	0.22756	-4.45965	0.00126868	0.0556973	-0.633066
362789	Zfyve21	zinc finger FYVE-type containing 21	-2.25457	0.258431	-4.8543	0.00070041	0.0556973	-0.110827
362827	Pias4	protein inhibitor of activated STAT, 4	-2.09795	-0.112346	-4.28078	0.00167279	0.0556973	-0.878565
362844	Brd4	bromodomain containing 4	-1.85594	0.266325	-4.06109	0.0023635	0.0556973	-1.18726
363064	Wdr61	WD repeat domain 61	-1.79453	-0.133316	-4.06274	0.00235729	0.0556973	-1.1849
363333	Chaf1a	chromatin assembly factor 1 subunit A	-1.91755	0.217801	-4.00339	0.00259085	0.0556973	-1.26958
364298	Pip4p1	phosphatidylinositol-4,5-bisphosphate 4-phosphatase 1	-1.89826	0.583906	-4.05984	0.0023682	0.0556973	-1.18904
364405	Scara3	scavenger receptor class A, member 3	-2.00945	-0.400914	-4.6548	0.000943122	0.0556973	-0.371434
365755	Tbl1xr1	transducin (beta)-like 1 X-linked receptor 1	-1.97113	-0.341074	-4.35521	0.00149017	0.0556973	-0.775762
365960	Gipc2	GIPC PDZ domain containing family, member 2	-2.16648	-0.516408	-4.57344	0.00106652	0.0556973	-0.479705
366854	Fbxo7	F-box protein 7	-1.77924	-0.159756	-4.00686	0.00257655	0.0556973	-1.26462
367100	Smad6	SMAD family member 6	-2.04668	0.0597904	-4.67435	0.000915789	0.0556973	-0.345587
367832	Zfx	zinc finger protein X-linked	-2.3807	0.310021	-5.09255	0.00049465	0.0556973	0.19116
399489	E2f1	E2F transcription factor 1	-2.00487	0.293672	-4.0687	0.0023351	0.0556973	-1.17643
406195	Tcf19	transcription factor 19	-2.10405	0.0256573	-4.18985	0.00192856	0.0556973	-1.0054
494021	Lmcd1	LIM and cysteine-rich domains 1	-2.61879	0.741677	-5.55944	0.000256163	0.0556973	0.753652
497672	Brca1	BRCA1, DNA repair associated	-2.16063	0.295265	-4.50403	0.00118538	0.0556973	-0.572992
497976	Rad51c	RAD51 paralog C	-1.96651	0.0548099	-3.95966	0.00277844	0.0556973	-1.33231
498014	RGD1565033	similar to hypothetical protein LOC284018 isoform b	-1.85468	0.470703	-4.18653	0.00193865	0.0556973	-1.01006
498136	Mtus2	microtubule associated scaffold protein 2	-1.98627	0.730137	-4.09252	0.00224856	0.0556973	-1.14262
498153	Gpr146	G protein-coupled receptor 146	-2.36567	-0.0273008	-5.21381	0.0004157	0.0556973	0.340972
498309	Vash2	vasohibin 2	-1.98583	0.196151	-4.48326	0.00122363	0.0556973	-0.601072
498416	Grb10	growth factor receptor bound protein 10	-2.27699	0.0270729	-4.95648	0.000602747	0.0556973	0.019924
498793	Itih2	inter-alpha-trypsin inhibitor heavy chain 2	-2.35193	0.136496	-5.00856	0.00055866	0.0556973	0.0858478
498796	Fam107b	family with sequence similarity 107, member B	-1.92461	0.0928039	-4.37194	0.00145211	0.0556973	-0.752787
499497	Mef2c	myocyte enhancer factor 2C	-1.93604	0.0532921	-4.4028	0.00138455	0.0556973	-0.710508
499724	RGD1560065	similar to RIKEN cDNA 2410004B18	-2.11134	-0.189218	-4.0286	0.00248881	0.0556973	-1.23355
499856	Fibin	fin bud initiation factor homolog	-2.02131	0.0454219	-4.30334	0.00161508	0.0556973	-0.847319
499933	Dsn1	DSN1 homolog, MIS12 kinetochore complex component	-1.94754	-0.143169	-4.21131	0.00186468	0.0556973	-0.975345
500032	Thsd7a	thrombospondin type 1 domain containing 7A	-2.13942	0.461713	-4.84446	0.000710672	0.0556973	-0.12352
500117	Ccdc126	coiled-coil domain containing 126	-1.89352	0.240749	-3.96071	0.00277377	0.0556973	-1.33081
500200	Atoh8	atonal bHLH transcription factor 8	-1.83516	-0.533834	-4.23257	0.0018036	0.0556973	-0.945641
500286	Ssuh2	ssu-2 homolog	-2.07033	0.208365	-4.1276	0.00212721	0.0556973	-1.09299
500545	Cdca8	cell division cycle associated 8	-2.16275	-0.0489981	-4.16258	0.00201304	0.0556973	-1.04369
500679	Rad51b	RAD51 paralog B	-2.04033	-0.189386	-4.06271	0.00235741	0.0556973	-1.18495
501552	Fancb	FA complementation group B	-2.11042	0.332479	-4.58209	0.00105263	0.0556973	-0.468147
619440	Aarsd1	alanyl-tRNA synthetase domain containing 1	-1.98949	-0.346469	-4.10988	0.00218762	0.0556973	-1.11804
619566	Cdca7l	cell division cycle associated 7 like	-2.02635	-0.156732	-4.39323	0.00140514	0.0556973	-0.723603
641528	Dtnbp1	dystrobrevin binding protein 1	-2.22729	-0.209868	-4.01056	0.00256137	0.0556973	-1.25932
679082	Arhgap19	Rho GTPase activating protein 19	-2.15479	0.0288213	-3.9694	0.00273544	0.0556973	-1.31831
679221	Mapre2	microtubule-associated protein, RP/EB family, member 2	-1.97335	-0.119039	-4.34111	0.00152307	0.0556973	-0.795164
679342	LOC679342	hypothetical protein LOC679342	-2.13128	-0.110403	-4.90006	0.000654732	0.0556973	-0.0520398
679640	Cntln	centlein	-2.19369	-0.200235	-4.4747	0.00123976	0.0556973	-0.612655
679921	Vasn	vasorin	-2.0187	0.391458	-4.36416	0.00146968	0.0556973	-0.763462
679944	Alkbh7	alkB homolog 7	-1.82892	-0.0656624	-4.15192	0.00204714	0.0556973	-1.05869
680133	Tbc1d8	TBC1 domain family, member 8	-1.97903	0.167974	-4.05057	0.00240332	0.0556973	-1.20222
680885	LOC680885	hypothetical protein LOC680885	-2.05906	0.0482451	-4.58146	0.00105364	0.0556973	-0.46899
681050	Pmf1	polyamine-modulated factor 1	-2.36347	-0.207443	-4.79548	0.000764177	0.0556973	-0.186939
681383	Lrmda	leucine rich melanocyte differentiation associated	-2.14147	-0.0145308	-4.81143	0.000746292	0.0556973	-0.166234
683626	Lbh	limb bud and heart development	-2.08825	0.819488	-4.7134	0.00086369	0.0556973	-0.294164
685082	Zfp318	zinc finger protein 318	-2.27252	0.152687	-4.14273	0.00207704	0.0556973	-1.07165
685232	Atp6v1a	ATPase H+ transporting V1 subunit A	-1.92175	0.118287	-4.06874	0.00233496	0.0556973	-1.17638
687022	Sec22c	SEC22 homolog C, vesicle trafficking protein	-2.09369	-0.121422	-4.32908	0.00155177	0.0556973	-0.811755
688228	Myl4	myosin, light chain 4	-1.88857	0.629448	-4.17889	0.00196204	0.0556973	-1.02077
688785	Trim8	tripartite motif-containing 8	-2.32349	0.132179	-4.29875	0.00162664	0.0556973	-0.853664
688885	Nol11	nucleolar protein 11	-1.9588	0.116294	-4.21675	0.00184884	0.0556973	-0.967734
690329	Lrrn4cl	LRRN4 C-terminal like	-1.93638	-0.0715317	-4.26622	0.00171123	0.0556973	-0.898793
690366	Vangl1	VANGL planar cell polarity protein 1	-1.966	-0.100841	-3.9624	0.00276627	0.0556973	-1.32837
690895	Zfp426	zinc finger protein 426	-1.99381	-0.06426	-3.98332	0.00267522	0.0556973	-1.29833
691221	Faxdc2	fatty acid hydroxylase domain containing 2	-2.12448	0.0999934	-4.48797	0.00121484	0.0556973	-0.594696
691380	Psrc1	proline and serine rich coiled-coil 1	-2.05736	0.00673239	-4.47816	0.00123322	0.0556973	-0.607975
691484	Eri2	ERI1 exoribonuclease family member 2	-1.96901	0.274224	-4.45542	0.00127695	0.0556973	-0.638815
691493	Zwilch	zwilch kinetochore protein	-2.17223	0.348974	-4.01737	0.00253374	0.0556973	-1.24959
691984	Gpc6	glypican 6	-1.96868	0.371696	-4.33879	0.00152858	0.0556973	-0.79837
100188944	Pnkd	PNKD, MBL domain containing	-1.82167	-0.0764714	-3.96862	0.00273888	0.0556973	-1.31944
100310874	Parpbp	PARP1 binding protein	-2.18683	-0.169062	-4.2344	0.00179844	0.0556973	-0.943089
100361376	Kank2	KN motif and ankyrin repeat domains 2	-2.34719	0.0318844	-5.10802	0.000483742	0.0556973	0.210417
100910753	Dnttip2	deoxynucleotidyltransferase, terminal, interacting protein 2	-2.05664	-0.22803	-4.1516	0.00204818	0.0556973	-1.05915
100910792	LOC100910792	amphiphysin-like	-1.96294	-0.0418063	-4.5396	0.00112281	0.0556973	-0.525082
100911069	Mtfr2	mitochondrial fission regulator 2	-1.95875	-0.0265523	-4.04313	0.00243191	0.0556973	-1.21282
100911864	LOC100911864	uncharacterized LOC100911864	-1.82509	-0.409902	-3.96591	0.00275075	0.0556973	-1.32332
102549471	LOC102549471	short transient receptor potential channel 2-like	-1.95372	-0.29016	-4.09558	0.00223769	0.0556973	-1.13828
102549942	LOC102549942	uncharacterized LOC102549942	-2.16954	0.305648	-4.20529	0.00188238	0.0556973	-0.983772
102555298	Wdr90	WD repeat domain 90	-2.15719	-0.0123185	-4.73215	0.000839789	0.0556973	-0.269553
103690130	Hoxa3	homeobox A3	-2.22794	0.149926	-4.45981	0.00126837	0.0556973	-0.632847
103691034	Peg3	paternally expressed 3	-1.75209	0.19876	-4.0194	0.00252553	0.0556973	-1.24668
103692224	LOC103692224	uncharacterized LOC103692224	-2.66965	-0.00232785	-5.80955	0.00018235	0.0556973	1.03916
103694063	LOC103694063	uncharacterized LOC103694063	-2.23716	-0.188729	-4.05931	0.00237017	0.0556973	-1.18978
108348590	LOC108348590	uncharacterized LOC108348590	-2.18341	-0.21234	-4.30106	0.0016208	0.0556973	-0.850462
108350199	LOC108350199	ATP synthase subunit g, mitochondrial pseudogene	-2.32729	-0.39582	-4.43439	0.00131884	0.0556973	-0.66741
108350919	LOC108350919	uncharacterized LOC108350919	-1.79045	0.0704074	-4.01599	0.00253932	0.0556973	-1.25156
108352198	LOC108352198	uncharacterized LOC108352198	-1.9959	0.343714	-4.27432	0.00168973	0.0556973	-0.887536
50552	Zfp292	zinc finger protein 292	-1.76066	-0.500125	-3.9437	0.00285037	0.0559649	-1.35527
57027	Adam17	ADAM metallopeptidase domain 17	-1.79404	-0.217373	-3.94712	0.0028348	0.0559649	-1.35035
291691	Brd8	bromodomain containing 8	-1.75708	-0.50782	-3.94567	0.00284138	0.0559649	-1.35243
309175	Cdc42ep2	CDC42 effector protein 2	-1.78295	0.0601179	-3.94761	0.00283259	0.0559649	-1.34965
314288	Pcnx1	pecanex 1	-1.82592	-0.50827	-3.94561	0.00284167	0.0559649	-1.35252
29184	Cd36	CD36 molecule	-2.10626	-0.118521	-3.93669	0.00288262	0.0561984	-1.36538
246331	Nrp1	neuropilin 1	-1.72728	0.189792	-3.93771	0.00287792	0.0561984	-1.36391
360243	Top2a	DNA topoisomerase II alpha	-2.23241	-0.182179	-3.93837	0.00287487	0.0561984	-1.36296
362187	Ccdc34	coiled-coil domain containing 34	-2.18343	-0.188248	-3.93565	0.00288741	0.0561984	-1.36687
100125373	Pnrc2	proline-rich nuclear receptor coactivator 2	-1.76166	-0.67235	-3.93478	0.00289147	0.0561984	-1.36813
24772	Cxcl12	C-X-C motif chemokine ligand 12	-1.78847	-0.264738	-3.92769	0.00292454	0.0562046	-1.37835
58921	Foxm1	forkhead box M1	-2.03826	0.173263	-3.9289	0.00291886	0.0562046	-1.3766
59294	Pold1	DNA polymerase delta 1, catalytic subunit	-1.90704	-0.0707173	-3.93066	0.00291064	0.0562046	-1.37407
116468	Rfc2	replication factor C subunit 2	-1.97424	0.0389287	-3.92718	0.00292696	0.0562046	-1.37909
304919	Dars2	aspartyl-tRNA synthetase 2 (mitochondrial)	-1.86287	-0.374271	-3.92623	0.00293142	0.0562046	-1.38046
313035	Dnajc8	DnaJ heat shock protein family (Hsp40) member C8	-1.92984	-0.370833	-3.92502	0.0029371	0.0562046	-1.3822
363028	Spc24	SPC24, NDC80 kinetochore complex component	-2.01017	-0.283415	-3.9282	0.00292214	0.0562046	-1.37761
688393	Gpn1	GPN-loop GTPase 1	-1.69111	-0.125501	-3.9262	0.00293157	0.0562046	-1.3805
25252	Dlg1	discs large MAGUK scaffold protein 1	-2.08442	-0.175944	-3.92222	0.00295035	0.0562749	-1.38624
679869	Tcf7l2	transcription factor 7 like 2	-1.68931	-0.137765	-3.92171	0.00295278	0.0562749	-1.38698
85242	Pola2	DNA polymerase alpha 2, accessory subunit	-1.82395	0.1159	-3.91793	0.00297074	0.0563359	-1.39243
287524	Rpa1	replication protein A1	-1.93499	-0.292594	-3.91767	0.00297201	0.0563359	-1.39281
361970	Trim2	tripartite motif-containing 2	-1.81757	-0.436313	-3.91808	0.00297002	0.0563359	-1.39221
298300	Ttc22	tetratricopeptide repeat domain 22	-1.76825	0.922502	-3.91476	0.0029859	0.056477	-1.39701
308607	E2f8	E2F transcription factor 8	-1.91102	0.340314	-3.91379	0.00299056	0.056477	-1.39841
312052	Steap2	STEAP2 metalloreductase	-1.70283	-0.225311	-3.9136	0.00299149	0.056477	-1.39869
25368	Adk	adenosine kinase	-1.76937	-0.904739	-3.89589	0.00307793	0.0567477	-1.4243
83514	Tsc22d3	TSC22 domain family, member 3	-1.75566	0.200796	-3.90187	0.00304844	0.0567477	-1.41564
115771	Usp2	ubiquitin specific peptidase 2	-1.83282	0.667312	-3.8954	0.00308037	0.0567477	-1.42501
293733	Incenp	inner centromere protein	-2.14183	0.122151	-3.89518	0.00308141	0.0567477	-1.42531
295971	Depdc7	DEP domain containing 7	-1.79935	-0.440575	-3.90849	0.00301616	0.0567477	-1.40607
299625	Lmnb2	lamin B2	-2.02845	0.401411	-3.8983	0.00306599	0.0567477	-1.4208
300126	Gtse1	G-2 and S-phase expressed 1	-2.05842	0.0310493	-3.89469	0.00308389	0.0567477	-1.42603
308796	Mesd	mesoderm development LRP chaperone	-1.7844	0.231985	-3.89991	0.00305809	0.0567477	-1.41848
313742	Phf13	PHD finger protein 13	-2.06581	-0.0613082	-3.89493	0.00308268	0.0567477	-1.42568
360953	Stx18	syntaxin 18	-1.78564	0.214219	-3.89528	0.00308095	0.0567477	-1.42518
499337	Dock8	dedicator of cytokinesis 8	-1.792	0.0856263	-3.90566	0.00302994	0.0567477	-1.41017
685055	Atr	ATR serine/threonine kinase	-1.83271	-0.192317	-3.89432	0.00308568	0.0567477	-1.42656
304547	Tchp	trichoplein, keratin filament binding	-1.87505	-0.0486746	-3.89059	0.00310427	0.0568007	-1.43196
363142	Sema3b	semaphorin 3B	-1.86984	0.107555	-3.89064	0.00310406	0.0568007	-1.4319
29149	Strn	striatin	-2.14025	0.109444	-3.88635	0.00312554	0.0569679	-1.4381
296619	Pkn3	protein kinase N3	-1.90346	-0.289775	-3.88711	0.00312173	0.0569679	-1.437
296635	Plpp7	phospholipid phosphatase 7 (inactive)	-1.9497	0.0494075	-3.88105	0.00315237	0.0569679	-1.44579
298342	Nkap	NFKB activating protein	-1.76832	0.242614	-3.88255	0.00314474	0.0569679	-1.44361
362974	RGD1304694	similar to CG9646-PA	-1.88888	-0.133321	-3.8838	0.00313844	0.0569679	-1.4418
683570	Gnpda1	glucosamine-6-phosphate deaminase 1	-1.79514	-0.486392	-3.88297	0.00314262	0.0569679	-1.443
310137	Cplane1	ciliogenesis and planar polarity effector 1	-1.94326	-0.194925	-3.87737	0.00317108	0.0571069	-1.45111
25407	Cd59	CD59 molecule	-2.06749	0.265913	-3.85163	0.00330556	0.0572126	-1.48848
54319	Ezr	ezrin	-1.69625	0.351603	-3.84522	0.00333997	0.0572126	-1.4978
59325	Ereg	epiregulin	-1.76685	0.0445145	-3.87319	0.00319251	0.0572126	-1.45717
63864	Hsd17b10	hydroxysteroid (17-beta) dehydrogenase 10	-1.7103	0.151852	-3.85746	0.00327459	0.0572126	-1.48001
65171	Scamp5	secretory carrier membrane protein 5	-2.34689	-0.279512	-3.84013	0.00336753	0.0572126	-1.50519
81715	Camlg	calcium modulating ligand	-1.89397	0.168403	-3.8455	0.00333843	0.0572126	-1.49738
171576	Bub1b	BUB1 mitotic checkpoint serine/threonine kinase B	-2.12837	0.0456714	-3.84109	0.00336234	0.0572126	-1.50381
245903	Magi3	membrane associated guanylate kinase, WW and PDZ domain containing 3	-2.1737	0.653636	-3.84947	0.0033171	0.0572126	-1.49161
287420	Pfas	phosphoribosylformylglycinamidine synthase	-1.87047	0.484497	-3.86218	0.00324971	0.0572126	-1.47314
288518	Get4	golgi to ER traffic protein 4	-1.94039	0.477432	-3.86275	0.00324677	0.0572126	-1.47233
295985	Mettl15	methyltransferase like 15	-2.06846	-0.150215	-3.87347	0.00319112	0.0572126	-1.45677
299112	Pole2	DNA polymerase epsilon 2, accessory subunit	-1.90433	0.175013	-3.84353	0.00334907	0.0572126	-1.50025
300955	Nck1	NCK adaptor protein 1	-2.06018	0.212581	-3.84372	0.00334807	0.0572126	-1.49998
303238	Ctc1	CST telomere replication complex component 1	-1.72716	-0.275088	-3.85914	0.00326571	0.0572126	-1.47756
308067	Brd9	bromodomain containing 9	-1.82533	-0.00406879	-3.87241	0.00319656	0.0572126	-1.45831
312566	Adamts9	ADAM metallopeptidase with thrombospondin type 1 motif, 9	-1.76643	0.622838	-3.85759	0.0032739	0.0572126	-1.47982
316602	Hjurp	Holliday junction recognition protein	-2.1399	0.161002	-3.86891	0.00321465	0.0572126	-1.46339
360972	Thoc5	THO complex 5	-1.68409	-0.692756	-3.84073	0.00336429	0.0572126	-1.50433
361202	Gkap1	G kinase anchoring protein 1	-1.92865	-0.787967	-3.85733	0.00327529	0.0572126	-1.4802
361954	Veph1	ventricular zone expressed PH domain-containing 1	-1.70574	0.0658457	-3.86284	0.00324629	0.0572126	-1.4722
362697	Ppp1r21	protein phosphatase 1, regulatory subunit 21	-1.84939	-0.0843366	-3.84156	0.00335976	0.0572126	-1.50312
408243	Ece2	endothelin-converting enzyme 2	-1.76999	0.0354101	-3.86372	0.00324166	0.0572126	-1.47091
494322	Pms1	PMS1 homolog 1, mismatch repair system component	-1.71123	-0.142982	-3.8448	0.00334224	0.0572126	-1.49841
499655	Cks1b	CDC28 protein kinase regulatory subunit 1B	-2.05133	0.121086	-3.84307	0.00335159	0.0572126	-1.50092
501043	Il20rb	interleukin 20 receptor subunit beta	-1.67463	-0.252928	-3.84137	0.0033608	0.0572126	-1.5034
679110	Frat2	FRAT2, WNT signaling pathway regulator	-1.70462	-0.0582518	-3.85784	0.00327256	0.0572126	-1.47945
685332	Rpp30	ribonuclease P/MRP subunit p30	-1.86938	-0.074256	-3.85069	0.00331057	0.0572126	-1.48984
102552818	LOC102552818	uncharacterized LOC102552818	-2.06346	-0.558102	-3.84109	0.00336232	0.0572126	-1.5038
103692526	LOC103692526	uncharacterized LOC103692526	-1.81405	-0.256372	-3.87219	0.00319768	0.0572126	-1.45862
308755	Blm	BLM RecQ like helicase	-1.93568	0.0845365	-3.83748	0.003382	0.0573106	-1.50906
289561	Polr2b	RNA polymerase II subunit B	-2.10613	-0.487229	-3.82835	0.00343231	0.0573597	-1.52235
290326	Pbk	PDZ binding kinase	-2.03733	-0.0386845	-3.82765	0.00343617	0.0573597	-1.52336
292263	Fbxo5	F-box protein 5	-2.09657	0.165845	-3.83462	0.00339766	0.0573597	-1.51321
305984	Cdca2	cell division cycle associated 2	-2.14715	0.249326	-3.82739	0.0034376	0.0573597	-1.52374
310782	Mybphl	myosin binding protein H-like	-1.79598	0.121454	-3.8251	0.00345039	0.0573597	-1.52708
315763	Mtfmt	mitochondrial methionyl-tRNA formyltransferase	-1.75919	-0.487871	-3.82792	0.00343469	0.0573597	-1.52297
316982	Resf1	retroelement silencing factor 1	-1.85308	0.582987	-3.82991	0.00342366	0.0573597	-1.52008
362980	Tubgcp6	tubulin, gamma complex associated protein 6	-1.93394	0.0946477	-3.8288	0.00342982	0.0573597	-1.5217
498256	Ier5	immediate early response 5	-1.87742	-0.436134	-3.82647	0.00344275	0.0573597	-1.52508
499935	Tti1	TELO2 interacting protein 1	-1.99863	-0.35317	-3.82874	0.00343011	0.0573597	-1.52177
682033	Ppp2r3b	protein phosphatase 2, regulatory subunit B'', beta	-1.91165	0.742483	-3.82604	0.00344514	0.0573597	-1.52571
24239	Cacna1c	calcium voltage-gated channel subunit alpha1 C	-1.86298	0.480744	-3.80758	0.00354968	0.0573669	-1.55263
24438	Hist1h1t	histone cluster 1 H1 family member t	-1.83412	0.361871	-3.81259	0.003521	0.0573669	-1.54532
24877	Vsnl1	visinin-like 1	-1.70613	-0.0371172	-3.8219	0.00346831	0.0573669	-1.53175
29685	Mcm6	minichromosome maintenance complex component 6	-1.95478	0.215232	-3.80647	0.00355604	0.0573669	-1.55424
64564	Bbox1	gamma-butyrobetaine hydroxylase 1	-2.14487	0.0321585	-3.81679	0.00349709	0.0573669	-1.53919
81813	Klf10	Kruppel-like factor 10	-1.74465	0.906894	-3.81054	0.00353268	0.0573669	-1.54831
113990	Hmgn3	high mobility group nucleosomal binding domain 3	-1.724	0.485033	-3.80637	0.00355663	0.0573669	-1.55439
171496	Atp2c2	ATPase secretory pathway Ca2+ transporting 2	-1.80833	0.0630276	-3.80943	0.00353906	0.0573669	-1.54993
192248	Cdh13	cadherin 13	-1.69361	0.565034	-3.81323	0.00351732	0.0573669	-1.54438
288308	Ltn1	listerin E3 ubiquitin protein ligase 1	-1.83338	0.748128	-3.81594	0.00350193	0.0573669	-1.54043
297444	Cfap100	cilia and flagella associated protein 100	-1.75285	0.12779	-3.81491	0.00350776	0.0573669	-1.54193
301056	Ctdspl	CTD small phosphatase like	-2.01142	0.112716	-3.8074	0.00355073	0.0573669	-1.5529
313865	Thada	THADA, armadillo repeat containing	-1.87402	0.253584	-3.81047	0.00353308	0.0573669	-1.54841
361684	Nap1l4	nucleosome assembly protein 1-like 4	-1.83833	-0.114565	-3.80784	0.00354817	0.0573669	-1.55225
362510	Melk	maternal embryonic leucine zipper kinase	-2.04745	0.0158602	-3.81015	0.00353493	0.0573669	-1.54888
680537	Nsd2	nuclear receptor binding SET domain protein 2	-2.20172	-0.472018	-3.80941	0.00353918	0.0573669	-1.54996
689656	Aunip	aurora kinase A and ninein interacting protein	-1.93492	0.254966	-3.80755	0.00354984	0.0573669	-1.55267
690911	Spen	spen family transcriptional repressor	-1.87081	0.281699	-3.8152	0.00350613	0.0573669	-1.54151
102555030	LOC102555030	uncharacterized LOC102555030	-1.72832	-0.337148	-3.81949	0.00348184	0.0573669	-1.53525
314859	Mdm1	Mdm1 nuclear protein	-2.01958	-0.139988	-3.80491	0.00356505	0.0574368	-1.55652
361512	Ehd2	EH-domain containing 2	-1.8261	-0.0278847	-3.80302	0.00357601	0.0575475	-1.55929
54237	Cdk1	cyclin-dependent kinase 1	-2.04716	0.0948192	-3.802	0.00358189	0.0575763	-1.56077
24917	Kpnb1	karyopherin subunit beta 1	-1.63705	0.485433	-3.79603	0.00361675	0.0578415	-1.56949
84410	Klf5	Kruppel-like factor 5	-1.86322	0.72851	-3.7961	0.00361632	0.0578415	-1.56939
311191	Ckap5	cytoskeleton associated protein 5	-2.19136	-0.216361	-3.79462	0.00362501	0.0578415	-1.57155
313387	Usp1	ubiquitin specific peptidase 1	-2.0404	0.315203	-3.79797	0.00360538	0.0578415	-1.56666
314981	Col14a1	collagen type XIV alpha 1 chain	-1.82368	0.21601	-3.79356	0.00363129	0.0578415	-1.57311
360461	Fopnl	FGFR1OP N-terminal like	-1.67284	-0.631182	-3.79268	0.00363643	0.057858	-1.57438
291885	Mcm5	minichromosome maintenance complex component 5	-1.88273	0.304934	-3.79016	0.00365132	0.0579637	-1.57807
24919	Yy1	YY1 transcription factor	-1.92743	0.259383	-3.78095	0.00370632	0.058064	-1.59154
29161	Cav3	caveolin 3	-1.92255	0.219729	-3.7839	0.00368866	0.058064	-1.58723
64193	Pttg1	pituitary tumor-transforming 1	-2.17714	-0.179727	-3.78575	0.00367758	0.058064	-1.58452
114499	Hdgf	heparin binding growth factor	-1.81734	-0.263957	-3.78146	0.00370328	0.058064	-1.5908
117021	Nup155	nucleoporin 155	-1.75598	-0.0446511	-3.77941	0.00371562	0.058064	-1.59379
304582	Sart3	spliceosome associated factor 3, U4/U6 recycling protein	-1.94397	-0.359778	-3.78356	0.00369068	0.058064	-1.58773
312030	Scaf11	SR-related CTD-associated factor 11	-1.65521	-0.447137	-3.78309	0.00369348	0.058064	-1.58841
312299	Ezh2	enhancer of zeste 2 polycomb repressive complex 2 subunit	-1.86016	0.189845	-3.78165	0.00370214	0.058064	-1.59052
315508	Ncapd3	non-SMC condensin II complex, subunit D3	-1.85437	0.636191	-3.7866	0.00367248	0.058064	-1.58327
360610	Nfe2l1	nuclear factor, erythroid 2-like 1	-1.74263	0.755207	-3.77727	0.00372857	0.058064	-1.59693
680039	LOC680039	hypothetical protein LOC680039	-2.02077	-0.42322	-3.78536	0.00367993	0.058064	-1.5851
680266	Gnb1l	G protein subunit beta 1 like	-1.75216	0.0163077	-3.78655	0.00367279	0.058064	-1.58335
64014	Dusp12	dual specificity phosphatase 12	-1.69042	-0.0289047	-3.76139	0.00382602	0.0581315	-1.62019
81825	Cirbp	cold inducible RNA binding protein	-1.6888	-0.0622107	-3.76288	0.00381674	0.0581315	-1.618
114483	Cdk6	cyclin-dependent kinase 6	-2.24933	0.322541	-3.7736	0.00375082	0.0581315	-1.60229
287805	Gprc5c	G protein-coupled receptor, class C, group 5, member C	-1.87468	0.0626221	-3.76014	0.00383378	0.0581315	-1.62201
289054	Aspm	abnormal spindle microtubule assembly	-2.17287	-0.17354	-3.75459	0.00386855	0.0581315	-1.63015
289175	Slc19a2	solute carrier family 19 member 2	-1.81583	-0.354999	-3.7665	0.00379433	0.0581315	-1.61269
292654	Tmem160	transmembrane protein 160	-1.64579	0.419787	-3.77054	0.0037695	0.0581315	-1.60677
300723	Hykk	hydroxylysine kinase	-2.30184	-0.0540586	-3.76153	0.00382515	0.0581315	-1.61998
303689	Ube2o	ubiquitin-conjugating enzyme E2O	-1.72086	-0.410152	-3.76099	0.00382852	0.0581315	-1.62078
304294	Rnf216	ring finger protein 216	-2.15747	-0.330111	-3.75851	0.00384396	0.0581315	-1.6244
305127	Zfp644	zinc finger protein 644	-1.99398	-0.31869	-3.75548	0.00386295	0.0581315	-1.62885
308944	St5	suppression of tumorigenicity 5	-1.96564	-0.367844	-3.76986	0.00377369	0.0581315	-1.60777
309025	Tacc2	transforming, acidic coiled-coil containing protein 2	-1.66188	-0.255443	-3.76715	0.00379034	0.0581315	-1.61174
309673	Rrp1b	ribosomal RNA processing 1B	-1.66858	0.623042	-3.76142	0.00382583	0.0581315	-1.62014
361055	Kpna3	karyopherin subunit alpha 3	-2.17418	-0.378852	-3.77093	0.00376716	0.0581315	-1.60621
362273	Cse1l	chromosome segregation 1 like	-1.76281	-0.0549876	-3.75694	0.00385379	0.0581315	-1.62671
362886	Rassf3	Ras association domain family member 3	-1.85421	0.252566	-3.75765	0.00384936	0.0581315	-1.62567
363174	Sgo1	shugoshin 1	-2.13964	0.0391357	-3.75593	0.00386015	0.0581315	-1.62819
499437	Mcm9	minichromosome maintenance 9 homologous recombination repair factor	-1.73732	-0.166004	-3.76398	0.00380996	0.0581315	-1.61639
690035	LOC690035	similar to Protein KIAA0586	-1.9003	-0.219185	-3.76758	0.00378769	0.0581315	-1.61111
102548848	LOC102548848	uncharacterized LOC102548848	-1.99625	0.288475	-3.77373	0.00375004	0.0581315	-1.60211
170904	Stk17b	serine/threonine kinase 17b	-1.69512	0.428589	-3.75289	0.00387926	0.0581373	-1.63265
287044	Clec16a	C-type lectin domain containing 16A	-1.84941	0.231683	-3.75302	0.00387846	0.0581373	-1.63246
305455	Nelfa	negative elongation factor complex member A	-1.6587	-0.55605	-3.75256	0.00388133	0.0581373	-1.63313
29526	Pla2g1b	phospholipase A2 group IB	-2.07763	0.173129	-3.75044	0.00389475	0.0581674	-1.63624
287173	Bod1	biorientation of chromosomes in cell division 1	-1.66527	-0.0717653	-3.74966	0.00389968	0.0581674	-1.63738
300947	Tfdp2	transcription factor Dp-2	-2.01164	-0.0336076	-3.74707	0.00391617	0.058329	-1.64119
362021	Gpsm2	G-protein signaling modulator 2	-2.09107	0.0294233	-3.74662	0.00391901	0.058329	-1.64184
24170	Add1	adducin 1	-1.64412	0.0550443	-3.72638	0.0040504	0.0584706	-1.67158
24368	Fh	fumarate hydratase	-1.67855	0.0439179	-3.73607	0.00398696	0.0584706	-1.65734
60334	Ensa	endosulfine alpha	-1.85919	0.391605	-3.74201	0.00394854	0.0584706	-1.64861
171444	Pacs1	phosphofurin acidic cluster sorting protein 1	-1.70578	-0.597922	-3.72748	0.00404314	0.0584706	-1.66996
171498	Sgk3	serum/glucocorticoid regulated kinase family, member 3	-1.6589	0.475428	-3.72469	0.00406156	0.0584706	-1.67406
192179	Gpm6b	glycoprotein m6b	-1.67153	-0.283953	-3.73928	0.00396618	0.0584706	-1.65263
293155	Anapc15	anaphase promoting complex subunit 15	-1.97328	-0.31922	-3.72473	0.00406127	0.0584706	-1.674
293488	Sgf29	SAGA complex associated factor 29	-1.82942	0.061401	-3.74047	0.00395851	0.0584706	-1.65088
294790	Skp2	S-phase kinase associated protein 2	-1.92597	0.442867	-3.73096	0.00402029	0.0584706	-1.66485
309041	Thumpd1	THUMP domain containing 1	-1.74975	-0.275067	-3.72583	0.00405401	0.0584706	-1.67238
313860	Pkdcc	protein kinase domain containing, cytoplasmic	-1.64369	-0.309147	-3.7406	0.00395764	0.0584706	-1.65068
314979	Deptor	DEP domain containing MTOR-interacting protein	-1.97229	0.0882833	-3.74277	0.0039437	0.0584706	-1.6475
363193	Ppp2r5d	protein phosphatase 2, regulatory subunit B', delta	-1.93922	-0.347668	-3.72715	0.00404529	0.0584706	-1.67044
373544	Ermp1	endoplasmic reticulum metallopeptidase 1	-1.72671	-0.144913	-3.73985	0.00396246	0.0584706	-1.65178
499322	Fam111a	family with sequence similarity 111, member A	-1.92001	0.162311	-3.72649	0.00404966	0.0584706	-1.67141
500364	Sspn	sarcospan	-1.91275	-0.0951454	-3.73383	0.00400149	0.0584706	-1.66062
685158	Cfap299	cilia and flagella associated protein 299	-1.778	-0.374661	-3.72958	0.00402933	0.0584706	-1.66687
100359865	Hrct1	histidine rich carboxyl terminus 1	-1.60916	0.866688	-3.73811	0.00397371	0.0584706	-1.65434
297594	Cdca3	cell division cycle associated 3	-2.08944	0.0258759	-3.72392	0.00406667	0.0584843	-1.6752
89804	Tek	TEK receptor tyrosine kinase	-1.67597	0.882795	-3.72303	0.0040726	0.0585098	-1.67651
282819	Ppif	peptidylprolyl isomerase F	-2.03043	0.404047	-3.7206	0.00408876	0.0586821	-1.68008
681433	Rgmb	repulsive guidance molecule BMP co-receptor b	-1.79214	0.0352854	-3.71947	0.00409625	0.0587296	-1.68173
360570	Myo18a	myosin XVIIIa	-1.76296	0.286857	-3.71841	0.00410333	0.0587712	-1.68329
81812	Thra	thyroid hormone receptor alpha	-1.69662	-0.0992129	-3.71172	0.00414837	0.058855	-1.69314
302502	Cul4b	cullin 4B	-2.12522	-0.127642	-3.71685	0.00411383	0.058855	-1.6856
310612	Ilf2	interleukin enhancer binding factor 2	-1.78495	-0.293504	-3.71133	0.00415102	0.058855	-1.69372
361917	Zfand1	zinc finger AN1-type containing 1	-1.66296	-0.486879	-3.71261	0.00414235	0.058855	-1.69183
100364002	LOC100364002	reproductive homeobox 9-like	-1.65516	-0.567981	-3.7157	0.00412154	0.058855	-1.68729
100365370	Ctdsp2	CTD small phosphatase 2	-1.67289	0.120991	-3.71422	0.00413153	0.058855	-1.68947
257649	Cenpf	centromere protein F	-2.13244	-0.171766	-3.70963	0.00416255	0.0588742	-1.69622
303175	Hist3h2ba	histone cluster 3, H2ba	-2.25554	0.428606	-3.70928	0.00416494	0.0588742	-1.69674
501096	Treml1	triggering receptor expressed on myeloid cells-like 1	-1.8836	0.256122	-3.7097	0.00416209	0.0588742	-1.69612
684111	E2f2	E2F transcription factor 2	-1.75742	0.593661	-3.70596	0.00418753	0.0588977	-1.70162
295160	Mnd1	meiotic nuclear divisions 1	-1.84702	-0.251115	-3.70531	0.00419203	0.058902	-1.70259
311443	Lrrn4	leucine rich repeat neuronal 4	-1.89928	-0.0789621	-3.70433	0.00419871	0.0589369	-1.70402
24221	Avp	arginine vasopressin	-2.08946	-0.0763852	-3.70164	0.00421719	0.0589746	-1.70799
60587	Dusp4	dual specificity phosphatase 4	-1.73853	0.807852	-3.70314	0.0042069	0.0589746	-1.70578
288111	Spice1	spindle and centriole associated protein 1	-1.65456	-0.254821	-3.7015	0.00421816	0.0589746	-1.7082
305482	Mtmr3	myotubularin related protein 3	-1.87719	-0.385844	-3.70185	0.00421577	0.0589746	-1.70768
364648	Shcbp1	SHC binding and spindle associated 1	-2.10859	0.199612	-3.70023	0.0042269	0.0590059	-1.71006
366017	Exosc2	exosome component 2	-1.7881	0.164062	-3.69996	0.00422879	0.0590059	-1.71047
306618	Arhgef10	Rho guanine nucleotide exchange factor 10	-1.68722	0.538341	-3.69799	0.00424244	0.0590207	-1.71338
29751	Sema3a	semaphorin 3A	-1.69891	-0.450588	-3.69631	0.00425405	0.0590266	-1.71584
54410	Enpp3	ectonucleotide pyrophosphatase/phosphodiesterase 3	-1.66453	0.770097	-3.69711	0.00424855	0.0590266	-1.71467
108348125	LOC108348125	zinc finger protein 883-like	-1.777	-0.226923	-3.69611	0.00425546	0.0590266	-1.71614
293113	Tmem126a	transmembrane protein 126A	-1.60687	-0.596718	-3.69535	0.00426072	0.0590415	-1.71726
299002	G2e3	G2/M-phase specific E3 ubiquitin protein ligase	-2.17604	0.0356248	-3.69406	0.00426976	0.0590503	-1.71917
292071	Cdt1	chromatin licensing and DNA replication factor 1	-1.71155	0.17994	-3.69119	0.00428982	0.0592172	-1.7234
293502	Kif22	kinesin family member 22	-2.04493	-0.0675082	-3.69113	0.00429025	0.0592172	-1.72349
65201	Clip1	CAP-GLY domain containing linker protein 1	-1.75571	0.391016	-3.6871	0.00431858	0.0592278	-1.72943
79119	Arf2	ADP-ribosylation factor 2	-1.83375	0.813424	-3.68401	0.00434043	0.0592278	-1.73398
81740	Pcm1	pericentriolar material 1	-1.81709	-0.486442	-3.68331	0.00434538	0.0592278	-1.73501
291670	Cxxc5	CXXC finger protein 5	-1.80098	0.185451	-3.68556	0.00432946	0.0592278	-1.7317
293184	Ctr9	CTR9 homolog, Paf1/RNA polymerase II complex component	-1.95154	-0.500655	-3.6867	0.00432138	0.0592278	-1.73001
297455	Lsm3	LSM3 homolog, U6 small nuclear RNA and mRNA degradation associated	-2.08287	0.105711	-3.68326	0.00434576	0.0592278	-1.73509
303337	Rab11fip4	RAB11 family interacting protein 4	-1.81431	-0.119951	-3.68728	0.00431732	0.0592278	-1.72917
313861	Eml4	EMAP like 4	-1.66243	0.344019	-3.68841	0.0043093	0.0592278	-1.72749
361084	Lmo7	LIM domain 7	-1.82163	0.452637	-3.68719	0.00431794	0.0592278	-1.7293
311573	Cep250	centrosomal protein 250	-1.9417	-0.438764	-3.67703	0.00439029	0.0595462	-1.7443
25679	Itpr3	inositol 1,4,5-trisphosphate receptor, type 3	-1.73664	-0.245457	-3.67541	0.00440195	0.0595894	-1.74669
29360	Selenop	selenoprotein P	-1.61347	-0.163797	-3.67591	0.00439834	0.0595894	-1.74595
500793	Btbd2	BTB domain containing 2	-1.67614	-0.216683	-3.67382	0.0044134	0.0596296	-1.74904
295324	Ttf2	transcription termination factor 2	-1.66294	-0.227922	-3.67141	0.00443085	0.0596634	-1.7526
308739	Rgma	repulsive guidance molecule BMP co-receptor a	-1.63152	-0.432263	-3.67164	0.00442914	0.0596634	-1.75225
686393	Pradc1	protease-associated domain containing 1	-1.85753	0.48561	-3.67113	0.00443287	0.0596634	-1.75301
24924	Ptn	pleiotrophin	-1.69418	-0.232621	-3.66441	0.00448184	0.0600043	-1.76293
25435	Eef2k	eukaryotic elongation factor-2 kinase	-1.6463	0.00412918	-3.66415	0.00448379	0.0600043	-1.76332
691455	Calml4	calmodulin-like 4	-1.65204	-0.0400278	-3.66583	0.00447144	0.0600043	-1.76083
304951	Nuf2	NDC80 kinetochore complex component NUF2	-2.04872	-0.0948724	-3.66116	0.00450578	0.060127	-1.76774
303617	Bptf	bromodomain PHD finger transcription factor	-1.85823	0.38763	-3.65978	0.00451596	0.0602057	-1.76978
24184	Ak2	adenylate kinase 2	-1.89982	-0.135467	-3.65658	0.00453971	0.0602976	-1.77451
24689	Prps2	phosphoribosyl pyrophosphate synthetase 2	-1.69118	0.41088	-3.65614	0.00454295	0.0602976	-1.77516
24874	Vhl	von Hippel-Lindau tumor suppressor	-1.70753	-0.069971	-3.65226	0.00457193	0.0602976	-1.7809
29388	Tnni1	troponin I1, slow skeletal type	-1.84693	0.43463	-3.65195	0.0045743	0.0602976	-1.78137
83614	Pias3	protein inhibitor of activated STAT, 3	-1.61785	-0.390189	-3.65789	0.00453	0.0602976	-1.77258
171047	Dnph1	2'-deoxynucleoside 5'-phosphate N-hydrolase 1	-1.62394	-0.518102	-3.65503	0.00455127	0.0602976	-1.77681
290805	Wrn	Werner syndrome RecQ like helicase	-2.12753	0.23967	-3.65246	0.00457043	0.0602976	-1.78061
292085	Nup133	nucleoporin 133	-1.99357	0.133885	-3.65589	0.00454486	0.0602976	-1.77554
308543	Plekhf1	pleckstrin homology and FYVE domain containing 1	-1.64186	0.100091	-3.65447	0.00455542	0.0602976	-1.77763
312054	Gtpbp10	GTP binding protein 10	-1.6251	-0.151795	-3.65244	0.0045706	0.0602976	-1.78064
170670	Hadha	hydroxyacyl-CoA dehydrogenase trifunctional multienzyme complex subunit alpha	-1.63406	-0.588985	-3.64983	0.00459018	0.0603372	-1.7845
300673	Bcl9l	BCL9 like	-1.68827	0.261837	-3.65061	0.0045843	0.0603372	-1.78334
307106	Sfmbt2	Scm-like with four mbt domains 2	-1.69504	0.589004	-3.64998	0.00458905	0.0603372	-1.78428
315914	Morc4	MORC family CW-type zinc finger 4	-1.60739	-0.367032	-3.64699	0.00461157	0.0605619	-1.7887
497083	Xkr5	XK related 5	-1.98779	0.0868978	-3.64616	0.00461791	0.0605886	-1.78994
361771	Zdhhc6	zinc finger, DHHC-type containing 6	-1.65919	-0.460049	-3.64358	0.00463743	0.0607879	-1.79375
83575	Cpz	carboxypeptidase Z	-2.08466	-0.289363	-3.63025	0.00473996	0.0609802	-1.8135
114117	Gng3	G protein subunit gamma 3	-1.79807	0.0880114	-3.63279	0.00472021	0.0609802	-1.80973
114767	Ptpre	protein tyrosine phosphatase, receptor type, E	-1.78901	-0.0597555	-3.63563	0.00469833	0.0609802	-1.80553
171159	Zhx1	zinc fingers and homeoboxes 1	-1.7312	-0.0467802	-3.63566	0.0046981	0.0609802	-1.80549
282834	Chmp3	charged multivesicular body protein 3	-1.60875	0.155255	-3.63754	0.00468358	0.0609802	-1.80269
309513	Ppp1r3c	protein phosphatase 1, regulatory subunit 3C	-1.78485	-0.316431	-3.62984	0.00474315	0.0609802	-1.81411
311325	Knstrn	kinetochore-localized astrin/SPAG5 binding protein	-2.03964	0.00861189	-3.62854	0.00475328	0.0609802	-1.81604
315532	Fli1	Fli-1 proto-oncogene, ETS transcription factor	-1.66831	-0.289951	-3.63703	0.00468752	0.0609802	-1.80345
360961	Mxd4	Max dimerization protein 4	-1.62206	0.208829	-3.63012	0.00474098	0.0609802	-1.8137
680531	Sapcd2	suppressor APC domain containing 2	-2.04976	0.0476325	-3.62837	0.00475462	0.0609802	-1.81629
685398	Ppp1r26	protein phosphatase 1, regulatory subunit 26	-1.61753	-0.70388	-3.63643	0.00469213	0.0609802	-1.80434
64389	Defb4	defensin beta 4	-1.98913	-0.309003	-3.62344	0.00479325	0.0611062	-1.8236
291841	Cnot1	CCR4-NOT transcription complex, subunit 1	-2.02194	0.134164	-3.62327	0.00479458	0.0611062	-1.82385
298487	Cldn19	claudin 19	-1.66692	0.101618	-3.62432	0.00478634	0.0611062	-1.8223
315762	Rasl12	RAS-like, family 12	-1.58244	-0.779181	-3.62304	0.00479639	0.0611062	-1.82419
363425	Cav2	caveolin 2	-1.6513	0.740194	-3.62567	0.00477575	0.0611062	-1.8203
24790	Sp1	Sp1 transcription factor	-1.61805	0.685026	-3.6173	0.00484182	0.0613383	-1.83271
286994	Lgr4	leucine-rich repeat-containing G protein-coupled receptor 4	-1.62327	-0.84631	-3.61763	0.00483919	0.0613383	-1.83222
287063	Nmral1	NmrA like redox sensor 1	-1.64301	-0.730448	-3.61922	0.00482659	0.0613383	-1.82987
303575	Kif18b	kinesin family member 18B	-1.97514	0.252273	-3.61861	0.00483139	0.0613383	-1.83076
313592	Col8a2	collagen type VIII alpha 2 chain	-1.57219	0.428208	-3.61827	0.00483412	0.0613383	-1.83127
289440	Ephx4	epoxide hydrolase 4	-1.86389	-0.329502	-3.61628	0.00484995	0.0613441	-1.83423
499415	Icoslg	inducible T-cell co-stimulator ligand	-1.87209	0.0677373	-3.61571	0.00485448	0.0613461	-1.83507
360847	Ube2t	ubiquitin-conjugating enzyme E2T	-1.97138	0.101883	-3.61473	0.00486232	0.0613901	-1.83653
315696	Snx33	sorting nexin 33	-1.65956	-0.277989	-3.6132	0.00487451	0.0614888	-1.83879
294260	Skiv2l	Ski2 like RNA helicase	-1.70986	0.159775	-3.61006	0.00489975	0.0616965	-1.84346
300838	Tmod3	tropomodulin 3	-2.06564	-0.203616	-3.60697	0.00492467	0.0619548	-1.84804
64532	Adcy5	adenylate cyclase 5	-1.9108	0.0142122	-3.60153	0.00496891	0.0620993	-1.85613
113995	P2rx5	purinergic receptor P2X 5	-1.74018	-0.0559338	-3.59745	0.0050024	0.0620993	-1.8622
171352	Cyp3a9	cytochrome P450, family 3, subfamily a, polypeptide 9	-2.02201	-0.0350836	-3.6027	0.00495938	0.0620993	-1.85439
300057	Recql4	RecQ like helicase 4	-1.81923	0.239713	-3.59998	0.00498162	0.0620993	-1.85843
315217	Plxnb2	plexin B2	-1.65192	0.14886	-3.59805	0.00499741	0.0620993	-1.86129
316426	Spats2l	spermatogenesis associated, serine-rich 2-like	-1.59187	0.687501	-3.60233	0.0049624	0.0620993	-1.85494
366205	Flrt3	fibronectin leucine rich transmembrane protein 3	-1.56327	-0.00121236	-3.59906	0.0049891	0.0620993	-1.85979
498310	Nsl1	NSL1, MIS12 kinetochore complex component	-1.98841	0.26749	-3.59712	0.00500505	0.0620993	-1.86267
680089	Ncaph	non-SMC condensin I complex, subunit H	-1.95365	0.149591	-3.59724	0.00500407	0.0620993	-1.8625
315864	Dop1a	DOP1 leucine zipper like protein A	-1.78394	-0.014582	-3.59142	0.00505222	0.0624424	-1.87115
29728	Mcm4	minichromosome maintenance complex component 4	-1.68033	0.234527	-3.59002	0.00506388	0.0624795	-1.87324
287830	Nup85	nucleoporin 85	-1.84887	0.298337	-3.58945	0.00506866	0.0624809	-1.87409
291541	Cidea	cell death-inducing DFFA-like effector a	-1.87685	0.176432	-3.58889	0.00507332	0.0624836	-1.87492
85255	Hacl1	2-hydroxyacyl-CoA lyase 1	-1.59136	0.755961	-3.5867	0.00509158	0.0625441	-1.87817
361147	Primpol	primase and DNA directed polymerase	-1.83666	-0.029258	-3.58604	0.00509711	0.0625574	-1.87915
27100	Gfer	growth factor, augmenter of liver regeneration	-1.60587	-0.393634	-3.58533	0.00510311	0.0625765	-1.88021
308837	Ints4	integrator complex subunit 4	-1.58185	-0.348846	-3.58455	0.00510969	0.0626026	-1.88138
60356	Csad	cysteine sulfinic acid decarboxylase	-1.5855	0.190516	-3.58153	0.0051351	0.0627499	-1.88586
83523	Impa1	inositol monophosphatase 1	-1.68053	0.10652	-3.57536	0.00518761	0.0631204	-1.89506
305882	Haus4	HAUS augmin-like complex, subunit 4	-1.83604	-0.344565	-3.57614	0.0051809	0.0631204	-1.89389
312491	Zfp638	zinc finger protein 638	-1.74927	-0.139185	-3.5729	0.00520863	0.0632886	-1.89871
315427	Sesn3	sestrin 3	-1.65464	-0.537004	-3.57264	0.00521087	0.0632886	-1.8991
291084	Nqo2	N-ribosyldihydronicotinamide:quinone reductase 2	-1.87326	0.378967	-3.57145	0.00522105	0.0633052	-1.90087
289822	Cep68	centrosomal protein 68	-1.89649	0.157419	-3.56971	0.00523604	0.0634323	-1.90346
683983	Nup43	nucleoporin 43	-1.95828	-0.327437	-3.56828	0.00524842	0.0635275	-1.90559
171451	Marc2	mitochondrial amidoxime reducing component 2	-1.56032	-0.387429	-3.56499	0.00527697	0.0635495	-1.9105
297685	Ddx47	DEAD-box helicase 47	-1.73542	-0.279879	-3.56594	0.00526866	0.0635495	-1.90907
300289	Amot	angiomotin	-1.97459	0.744919	-3.56391	0.00528634	0.0635495	-1.9121
309280	Plxna3	plexin A3	-1.57926	-0.366888	-3.56305	0.00529384	0.0635495	-1.91338
309523	Kif20b	kinesin family member 20B	-2.11694	0.0350021	-3.56339	0.00529088	0.0635495	-1.91288
362227	Dtd1	D-tyrosyl-tRNA deacylase 1	-1.57981	-0.358203	-3.56368	0.0052884	0.0635495	-1.91245
362271	Elmo2	engulfment and cell motility 2	-1.69058	-0.180795	-3.56287	0.00529541	0.0635495	-1.91365
689883	Setdb1	SET domain, bifurcated 1	-2.02584	-0.221204	-3.56668	0.00526232	0.0635495	-1.90799
171529	Kif2c	kinesin family member 2C	-2.06859	0.0176166	-3.56174	0.00530533	0.0636142	-1.91535
25496	Notch1	notch 1	-1.65397	-0.144407	-3.55581	0.00535746	0.0638307	-1.92419
157074	Sdha	succinate dehydrogenase complex flavoprotein subunit A	-1.61043	-0.0457927	-3.55372	0.00537594	0.0638307	-1.9273
296560	Uap1l1	UDP-N-acetylglucosamine pyrophosphorylase 1 like 1	-1.58903	-0.53387	-3.55515	0.00536322	0.0638307	-1.92516
301513	Cnot9	CCR4-NOT transcription complex subunit 9	-1.75906	0.358776	-3.55801	0.00533802	0.0638307	-1.9209
314438	Degs2	delta(4)-desaturase, sphingolipid 2	-1.787	0.260085	-3.55813	0.00533699	0.0638307	-1.92072
317598	Mcf2	MCF.2 cell line derived transforming sequence	-1.8686	-0.221983	-3.55708	0.00534622	0.0638307	-1.92229
497985	Hoxb7	homeo box B7	-1.60563	-0.349433	-3.55316	0.00538087	0.0638307	-1.92813
287961	Cdc45	cell division cycle 45	-1.69637	0.37045	-3.5514	0.00539656	0.0638911	-1.93076
300644	Gramd1b	GRAM domain containing 1B	-1.58375	-0.452901	-3.5508	0.0054019	0.0639005	-1.93166
289046	Tmem9	transmembrane protein 9	-1.60501	-0.504565	-3.54719	0.00543414	0.0640664	-1.93704
56083	Tgm2	transglutaminase 2	-1.75799	0.616567	-3.54634	0.0054418	0.0640902	-1.93831
78972	Zfp354c	zinc finger protein 354C	-1.59618	-0.228418	-3.5413	0.0054872	0.0642747	-1.94582
287989	Ephb3	Eph receptor B3	-1.73596	0.0662615	-3.54078	0.00549197	0.0642747	-1.94661
296060	Arhgap11a	Rho GTPase activating protein 11A	-2.08544	-0.00392049	-3.54017	0.00549751	0.0642747	-1.94752
315666	Npat	nuclear protein, co-activator of histone transcription	-2.08507	0.00186128	-3.54183	0.00548239	0.0642747	-1.94503
361943	Pcdh10	protocadherin 10	-1.61613	-0.240253	-3.54138	0.00548649	0.0642747	-1.94571
102553329	LOC102553329	uncharacterized LOC102553329	-1.59122	-0.169873	-3.54249	0.00547642	0.0642747	-1.94405
29261	Tyms	thymidylate synthetase	-1.93114	-0.026104	-3.53721	0.00552442	0.0643196	-1.95194
59102	Rpa2	replication protein A2	-1.77615	0.310197	-3.53483	0.00554618	0.0643196	-1.95549
161452	Lef1	lymphoid enhancer binding factor 1	-1.55854	-0.409437	-3.53725	0.00552406	0.0643196	-1.95188
207118	Bod1l1	biorientation of chromosomes in cell division 1-like 1	-1.8139	0.525784	-3.53473	0.00554708	0.0643196	-1.95564
308106	Map3k4	mitogen activated protein kinase kinase kinase 4	-1.6252	-0.70016	-3.53552	0.00553985	0.0643196	-1.95446
361104	Zcchc24	zinc finger CCHC-type containing 24	-1.65146	-0.506275	-3.53704	0.00552594	0.0643196	-1.95219
361956	Rsrc1	arginine and serine rich coiled-coil 1	-1.79827	-0.582515	-3.53503	0.00554436	0.0643196	-1.9552
363493	Taf7l	TATA-box binding protein associated factor 7-like	-1.91948	-0.291422	-3.53643	0.00553149	0.0643196	-1.9531
686234	Mtrf1	mitochondrial translation release factor 1	-1.65604	-0.61416	-3.53315	0.00556155	0.0644343	-1.958
81736	Nfkb1	nuclear factor kappa B subunit 1	-1.78323	0.0472357	-3.53221	0.00557021	0.0644371	-1.9594
296601	Mymk	myomaker, myoblast fusion factor	-1.62613	0.0783513	-3.53213	0.00557095	0.0644371	-1.95953
363767	Abi3bp	ABI family member 3 binding protein	-1.60779	0.423253	-3.53144	0.00557733	0.0644578	-1.96056
501007	Insyn1	inhibitory synaptic factor 1	-1.81495	-0.0866474	-3.5301	0.00558964	0.064494	-1.96255
684830	Ttc32	tetratricopeptide repeat domain 32	-1.72618	-0.162126	-3.53018	0.0055889	0.064494	-1.96243
303885	Rubcn	rubicon autophagy regulator	-1.72302	0.190551	-3.52913	0.00559861	0.0645447	-1.96401
294286	Kifc1	kinesin family member C1	-1.96809	0.082877	-3.52693	0.00561901	0.0646737	-1.96729
295661	Spc25	SPC25, NDC80 kinetochore complex component	-1.93435	0.0593175	-3.5248	0.00563875	0.0647421	-1.97047
312451	Tcf7l1	transcription factor 7 like 1	-1.53956	0.0312537	-3.52389	0.0056473	0.0647873	-1.97184
294712	Cenpk	centromere protein K	-2.13567	-0.0627773	-3.51906	0.00569255	0.0652533	-1.97906
25151	Igf2r	insulin-like growth factor 2 receptor	-1.55703	0.757769	-3.51351	0.00574501	0.0656092	-1.98736
29738	Kcnab2	potassium voltage-gated channel subfamily A regulatory beta subunit 2	-1.61855	-0.407564	-3.5124	0.00575552	0.0656092	-1.98901
83764	Flot2	flotillin 2	-1.63726	0.139255	-3.51389	0.00574136	0.0656092	-1.98678
246262	Sema3d	semaphorin 3D	-1.57373	0.539075	-3.51061	0.00577267	0.0656092	-1.9917
291737	Ino80c	INO80 complex subunit C	-1.83866	0.0472855	-3.51096	0.00576927	0.0656092	-1.99117
309430	Dmrt2	doublesex and mab-3 related transcription factor 2	-1.63113	0.256738	-3.51179	0.0057614	0.0656092	-1.98993
310855	Gstcd	glutathione S-transferase, C-terminal domain containing	-1.80279	0.171693	-3.50977	0.00578062	0.0656092	-1.99295
500323	Parp11	poly (ADP-ribose) polymerase family, member 11	-1.77349	-0.247956	-3.5112	0.00576701	0.0656092	-1.99081
501630	Pwwp3b	PWWP domain containing 3B	-1.52277	-0.572645	-3.50991	0.00577934	0.0656092	-1.99275
360547	Sat2	spermidine/spermine N1-acetyltransferase family member 2	-1.65496	-0.563035	-3.50757	0.00580168	0.0657539	-1.99624
25492	Nfia	nuclear factor I/A	-1.58626	0.144218	-3.5026	0.00584961	0.0660762	-2.00368
50557	Pten	phosphatase and tensin homolog	-1.745	-0.183292	-3.4996	0.00587869	0.0660762	-2.00817
114207	Ryr1	ryanodine receptor 1	-2.04661	-0.00521747	-3.50304	0.0058454	0.0660762	-2.00303
116683	Efna5	ephrin A5	-1.65551	0.799776	-3.50268	0.00584889	0.0660762	-2.00357
155183	Skap2	src kinase associated phosphoprotein 2	-1.75291	-0.565118	-3.50188	0.00585661	0.0660762	-2.00476
293129	Alg8	ALG8, alpha-1,3-glucosyltransferase	-1.62494	-0.334008	-3.50109	0.00586428	0.0660762	-2.00595
304336	RGD1566386	similar to Hypothetical protein A430033K04	-1.9067	-0.521447	-3.4988	0.00588649	0.0660762	-2.00937
316732	Smchd1	structural maintenance of chromosomes flexible hinge domain containing 1	-2.03257	-0.259039	-3.4991	0.0058836	0.0660762	-2.00892
497995	Krtap1-5	keratin associated protein 1-5	-1.72416	-0.0807938	-3.49924	0.00588222	0.0660762	-2.00871
498423	Sertad2	SERTA domain containing 2	-1.5198	0.398041	-3.50109	0.00586426	0.0660762	-2.00594
116724	Epb41l3	erythrocyte membrane protein band 4.1-like 3	-1.52354	0.228697	-3.49733	0.00590085	0.0660792	-2.01157
362671	RGD1304567	similar to RIKEN cDNA A430005L14	-1.78293	-0.0462739	-3.49739	0.00590025	0.0660792	-2.01148
117538	Wipf1	WAS/WASL interacting protein family, member 1	-1.83173	-0.18091	-3.49512	0.0059225	0.0660808	-2.01488
299923	Ndrg1	N-myc downstream regulated 1	-1.59584	-0.832828	-3.49538	0.00591998	0.0660808	-2.0145
361103	Zmiz1	zinc finger, MIZ-type containing 1	-1.94597	0.083282	-3.49684	0.00590569	0.0660808	-2.01231
297520	Il17rc	interleukin 17 receptor C	-1.59331	0.171364	-3.4924	0.00594926	0.0662521	-2.01896
306338	Abhd8	abhydrolase domain containing 8	-1.71799	-0.22145	-3.49144	0.00595868	0.0662521	-2.0204
308839	Rsf1	remodeling and spacing factor 1	-1.76745	0.0803198	-3.49183	0.00595478	0.0662521	-2.0198
367167	Traip	TRAF-interacting protein	-2.13176	0.105472	-3.49233	0.00594986	0.0662521	-2.01905
24265	Ckm	creatine kinase, M-type	-1.82255	0.00867302	-3.4878	0.0059947	0.0662803	-2.02585
29635	Timm44	translocase of inner mitochondrial membrane 44	-1.62874	-0.137667	-3.48762	0.00599645	0.0662803	-2.02611
296344	Mybl2	MYB proto-oncogene like 2	-1.92162	0.386281	-3.48845	0.00598825	0.0662803	-2.02487
296545	C8g	complement C8 gamma chain	-1.83437	-0.524976	-3.49008	0.00597207	0.0662803	-2.02243
498840	Tmem173	transmembrane protein 173	-1.70573	0.410406	-3.49062	0.00596677	0.0662803	-2.02162
312182	Rbm28	RNA binding motif protein 28	-1.62836	0.0256498	-3.48666	0.00600608	0.0663073	-2.02756
304573	Pole	DNA polymerase epsilon, catalytic subunit	-1.87751	0.362023	-3.48522	0.00602041	0.066348	-2.02972
313479	Orc1	origin recognition complex, subunit 1	-1.75087	0.278957	-3.48424	0.00603016	0.0663648	-2.03118
363225	RGD1305645	similar to RIKEN cDNA 1500015O10	-1.52633	-0.400671	-3.48236	0.00604896	0.0664836	-2.034
289810	C1d	C1D nuclear receptor corepressor	-1.54745	-0.306262	-3.48015	0.00607111	0.0665186	-2.03731
289997	Dlgap5	DLG associated protein 5	-1.95393	-0.00584892	-3.48055	0.00606709	0.0665186	-2.03671
301007	Wdr6	WD repeat domain 6	-1.54451	-0.120331	-3.47933	0.00607939	0.0665186	-2.03854
361522	Hnrnpul1	heterogeneous nuclear ribonucleoprotein U-like 1	-1.66487	-0.106541	-3.4803	0.00606962	0.0665186	-2.03709
246216	Prpf19	pre-mRNA processing factor 19	-1.69417	-0.289213	-3.47765	0.00609641	0.0666134	-2.04107
310005	Aggf1	angiogenic factor with G patch and FHA domains 1	-1.50839	0.289077	-3.47728	0.00610011	0.0666134	-2.04162
296849	Pdk3	pyruvate dehydrogenase kinase 3	-1.57508	-0.492409	-3.47673	0.0061057	0.0666228	-2.04245
297525	Mkrn2	makorin, ring finger protein, 2	-1.84749	-0.138414	-3.47582	0.0061149	0.066639	-2.04381
316736	Emilin2	elastin microfibril interfacer 2	-1.56574	-0.396513	-3.47564	0.00611667	0.066639	-2.04408
313785	Icam5	intercellular adhesion molecule 5	-1.60351	0.067312	-3.47438	0.00612952	0.0666757	-2.04598
308637	Ano5	anoctamin 5	-2.15892	-0.034457	-3.47271	0.00614651	0.0668089	-2.04848
290963	Npepo	aminopeptidase O	-1.98319	-0.0515745	-3.46909	0.00618351	0.0669002	-2.05391
290997	Uimc1	ubiquitin interaction motif containing 1	-1.87563	-0.236509	-3.46893	0.00618515	0.0669002	-2.05415
303693	Mgat5b	alpha-1,6-mannosylglycoprotein 6-beta-N-acetylglucosaminyltransferase B	-2.00677	0.0551683	-3.47095	0.00616441	0.0669002	-2.05111
305166	Gpat3	glycerol-3-phosphate acyltransferase 3	-1.69653	0.110247	-3.46863	0.00618821	0.0669002	-2.0546
360559	Pimreg	PICALM interacting mitotic regulator	-1.95476	0.294482	-3.46953	0.00617894	0.0669002	-2.05324
361416	Cenpn	centromere protein N	-1.99699	-0.0039564	-3.46965	0.00617773	0.0669002	-2.05307
362393	Antxr1	ANTXR cell adhesion molecule 1	-1.85642	0.169622	-3.46804	0.00619421	0.0669136	-2.05548
140923	Bnip3l	BCL2 interacting protein 3 like	-1.68799	-0.159254	-3.46682	0.0062068	0.06693	-2.05731
287178	Ubtd2	ubiquitin domain containing 2	-1.57664	0.821265	-3.46651	0.00621	0.06693	-2.05778
25124	Stat1	signal transducer and activator of transcription 1	-1.83933	0.0420097	-3.46362	0.00623983	0.0670399	-2.06212
117524	Ccnf	cyclin F	-1.96256	0.232574	-3.46281	0.00624816	0.0670399	-2.06332
287603	Tex14	testis expressed 14, intercellular bridge forming factor	-2.14227	0.0996949	-3.46247	0.00625173	0.0670399	-2.06384
293452	Palb2	partner and localizer of BRCA2	-1.82645	0.205921	-3.4642	0.0062338	0.0670399	-2.06124
366461	Ppih	peptidylprolyl isomerase H	-1.94845	-0.253299	-3.46229	0.00625357	0.0670399	-2.06411
24788	Sord	sorbitol dehydrogenase	-1.50029	-0.749519	-3.461	0.00626702	0.0671114	-2.06605
303798	Arvcf	ARVCF, delta catenin family member	-1.65644	-0.136566	-3.45956	0.00628194	0.0671114	-2.06821
361921	Ect2	epithelial cell transforming 2	-1.9857	0.116935	-3.46057	0.00627147	0.0671114	-2.0667
25681	Col10a1	collagen type X alpha 1 chain	-1.95801	0.666281	-3.45732	0.0063054	0.0671497	-2.07158
314473	Kif26a	kinesin family member 26A	-1.49587	-0.245114	-3.45783	0.00630002	0.0671497	-2.07081
361378	Man2b1	mannosidase, alpha, class 2B, member 1	-1.64916	-0.213029	-3.45416	0.00633847	0.0672327	-2.07631
100361658	Usp37	ubiquitin specific peptidase 37	-1.67989	0.268628	-3.45238	0.00635726	0.0672799	-2.07899
291877	Nudt21	nudix hydrolase 21	-1.93956	-0.429235	-3.45133	0.00636839	0.0672963	-2.08058
293939	Erlin1	ER lipid raft associated 1	-1.48097	-0.0445058	-3.44346	0.00645215	0.0675219	-2.09241
295538	Depdc1	DEP domain containing 1	-1.99468	-0.0329739	-3.44383	0.00644815	0.0675219	-2.09184
297903	Fam92a	family with sequence similarity 92 member A	-1.67047	-0.701792	-3.44612	0.0064237	0.0675219	-2.08841
316219	Trerf1	transcriptional regulating factor 1	-1.65786	-0.550013	-3.44544	0.00643095	0.0675219	-2.08943
317546	Tab3	TGF-beta activated kinase 1 (MAP3K7) binding protein 3	-1.80637	-0.103364	-3.4437	0.00644955	0.0675219	-2.09204
362557	Ndc1	NDC1 transmembrane nucleoporin	-1.9706	-0.295051	-3.44384	0.00644809	0.0675219	-2.09184
501712	Slfn3	schlafen 3	-1.92312	0.298574	-3.44512	0.0064344	0.0675219	-2.08991
687192	Gid4	GID complex subunit 4	-1.83187	0.116832	-3.44801	0.00640355	0.0675219	-2.08556
117260	Nudt1	nudix hydrolase 1	-1.81608	-0.337013	-3.44274	0.00645978	0.0675515	-2.09347
89809	Rfc1	replication factor C subunit 1	-1.71915	0.287203	-3.44222	0.00646546	0.0675607	-2.09427
100360017	Mrps6	mitochondrial ribosomal protein S6	-1.5426	-0.136762	-3.44114	0.00647705	0.0676315	-2.09589
690965	Ccdc85c	coiled-coil domain containing 85C	-1.52363	-0.304168	-3.44006	0.00648861	0.0677021	-2.09751
308831	Tenm4	teneurin transmembrane protein 4	-1.4972	-0.442041	-3.43959	0.0064937	0.0677049	-2.09822
24967	Psmb9	proteasome subunit beta 9	-1.51551	-0.215223	-3.43626	0.0065297	0.0677099	-2.10322
29585	Gjb3	gap junction protein, beta 3	-1.70348	-0.441925	-3.42572	0.00664516	0.0677099	-2.11909
54244	Crebbp	CREB binding protein	-1.92643	0.177954	-3.4309	0.00658815	0.0677099	-2.11129
81637	Ap2a2	adaptor related protein complex 2 subunit alpha 2	-1.65898	-0.0391466	-3.42816	0.00661822	0.0677099	-2.11541
89807	Angpt1	angiopoietin 1	-1.56845	-0.304848	-3.42578	0.00664441	0.0677099	-2.11899
114560	Rap2a	RAP2A, member of RAS oncogene family	-1.6269	0.217147	-3.43406	0.00655361	0.0677099	-2.10653
287899	Adamts2	ADAM metallopeptidase with thrombospondin type 1 motif, 2	-1.6403	0.0961519	-3.42712	0.00662968	0.0677099	-2.11698
300710	Ddx10	DEAD-box helicase 10	-1.50237	0.0157389	-3.43452	0.00654861	0.0677099	-2.10584
300719	Cib2	calcium and integrin binding family member 2	-1.69465	-0.152942	-3.42851	0.00661431	0.0677099	-2.11488
307217	Tshz1	teashirt zinc finger homeobox 1	-1.61497	-0.589599	-3.42638	0.00663783	0.0677099	-2.11809
308761	Prc1	protein regulator of cytokinesis 1	-1.94551	0.0444025	-3.43455	0.0065483	0.0677099	-2.1058
309527	Ch25h	cholesterol 25-hydroxylase	-1.98004	-0.0789274	-3.42497	0.00665343	0.0677099	-2.12021
312705	C1r	complement C1r	-1.60903	-0.00211164	-3.43199	0.00657623	0.0677099	-2.10965
313662	Mfap2	microfibril associated protein 2	-1.53244	0.549322	-3.42797	0.00662025	0.0677099	-2.11569
314140	LOC314140	ribose-phosphate pyrophosphokinase I -like	-1.58064	0.180952	-3.43773	0.00651381	0.0677099	-2.10102
360886	Ahctf1	AT hook containing transcription factor 1	-2.13366	0.162709	-3.42925	0.00660622	0.0677099	-2.11377
361274	Nudt5	nudix hydrolase 5	-1.5929	-0.760784	-3.43534	0.00653974	0.0677099	-2.10461
362186	Kif18a	kinesin family member 18A	-1.97153	0.0287339	-3.42457	0.00665786	0.0677099	-2.12082
362600	Adprhl2	ADP-ribosylhydrolase like 2	-1.61196	0.350143	-3.42494	0.00665373	0.0677099	-2.12026
362687	Srsf7	serine and arginine rich splicing factor 7	-1.61722	-0.715545	-3.4328	0.00656734	0.0677099	-2.10843
363249	Ctdsp1	CTD small phosphatase 1	-1.65938	0.0986993	-3.43615	0.00653091	0.0677099	-2.10339
499335	Fxn	frataxin	-1.59473	-0.404815	-3.42971	0.00660121	0.0677099	-2.11308
500552	RGD1561149	similar to mKIAA1522 protein	-1.4952	0.0313831	-3.42555	0.00664697	0.0677099	-2.11934
500651	Sptssa	serine palmitoyltransferase, small subunit A	-1.76421	-0.371236	-3.42521	0.0066507	0.0677099	-2.11984
500700	Cep128	centrosomal protein 128	-1.98076	-0.161771	-3.43795	0.00651147	0.0677099	-2.10069
288479	Pms2	PMS1 homolog 2, mismatch repair system component	-1.61279	-0.42534	-3.42384	0.00666591	0.0677428	-2.12191
290640	Map1s	microtubule-associated protein 1S	-1.81776	0.438691	-3.42247	0.00668108	0.0677501	-2.12397
681178	Pcgf5	polycomb group ring finger 5	-1.68019	0.503284	-3.42158	0.00669099	0.0678017	-2.12531
25257	Gamt	guanidinoacetate N-methyltransferase	-1.56687	-0.231369	-3.42016	0.00670684	0.0678645	-2.12745
305497	Cobl	cordon-bleu WH2 repeat protein	-1.57192	-0.143909	-3.42041	0.00670402	0.0678645	-2.12707
308968	Rbbp6	RB binding protein 6, ubiquitin ligase	-1.52981	0.310404	-3.41905	0.0067192	0.0678919	-2.12912
100911806	LOC100911806	uncharacterized LOC100911806	-1.83025	-0.318006	-3.41909	0.00671877	0.0678919	-2.12906
171329	Usp15	ubiquitin specific peptidase 15	-1.74804	-0.149102	-3.41813	0.00672954	0.0679431	-2.13051
360917	Cnot6l	CCR4-NOT transcription complex, subunit 6-like	-1.886	-0.443539	-3.41716	0.00674035	0.0679519	-2.13197
362061	Cryz	crystallin zeta	-1.56673	-0.677188	-3.41679	0.00674447	0.0679519	-2.13252
306809	Bicd2	BICD cargo adaptor 2	-1.76101	0.216372	-3.41616	0.00675159	0.067975	-2.13348
293783	Lpxn	leupaxin	-1.49082	-0.581675	-3.41388	0.00677718	0.0680865	-2.1369
361857	Traf3ip2	Traf3 interacting protein 2	-1.68984	0.148003	-3.41283	0.00678904	0.0681569	-2.13848
64161	Pi4ka	phosphatidylinositol 4-kinase alpha	-1.68519	-0.0648218	-3.40948	0.00682708	0.0682463	-2.14354
171103	Cdc25b	cell division cycle 25B	-2.00358	-0.0580295	-3.41086	0.00681137	0.0682463	-2.14146
314397	Rin3	Ras and Rab interactor 3	-2.10464	0.226069	-3.41149	0.0068042	0.0682463	-2.1405
100361188	Etfrf1	electron transfer flavoprotein regulatory factor 1	-1.5942	0.0320506	-3.40927	0.00682938	0.0682463	-2.14385
102549483	LOC102549483	uncharacterized LOC102549483	-2.14356	0.170059	-3.40862	0.00683676	0.0682463	-2.14483
689176	Tmem64	transmembrane protein 64	-1.93857	-0.141918	-3.40761	0.00684833	0.0683133	-2.14636
64196	Safb	scaffold attachment factor B	-1.86356	0.425189	-3.40414	0.00688792	0.0683206	-2.15158
65152	Pfkm	phosphofructokinase, muscle	-1.56082	-0.343827	-3.4057	0.00687015	0.0683206	-2.14924
301085	Fyco1	FYVE and coiled-coil domain containing 1	-1.55663	0.201497	-3.40708	0.00685437	0.0683206	-2.14716
309081	Dock1	dedicator of cyto-kinesis 1	-1.5819	-0.706542	-3.40629	0.0068634	0.0683206	-2.14835
316235	Polh	DNA polymerase eta	-1.79382	0.210828	-3.40568	0.00687028	0.0683206	-2.14925
497944	Zfp3	zinc finger protein 3	-1.84035	-0.122833	-3.4046	0.00688266	0.0683206	-2.15088
286928	Abi2	abl-interactor 2	-1.56261	-0.748142	-3.40335	0.00689701	0.0683625	-2.15277
363252	Retreg2	reticulophagy regulator family member 2	-1.81248	-0.216863	-3.40263	0.00690529	0.0683964	-2.15386
50564	Gjd2	gap junction protein, delta 2	-1.59497	0.234935	-3.40128	0.00692077	0.0685015	-2.15589
25026	Adm	adrenomedullin	-1.54527	-0.619404	-3.39897	0.00694755	0.0687182	-2.15938
313806	Rnf19b	ring finger protein 19B	-1.5973	-0.143855	-3.39792	0.00695962	0.0687892	-2.16095
303792	Klhl22	kelch-like family member 22	-1.62028	-0.186674	-3.39653	0.00697572	0.0688516	-2.16305
25193	Ccnd3	cyclin D3	-1.55776	0.417237	-3.39276	0.00701971	0.0689601	-2.16874
207122	Pkn2	protein kinase N2	-1.90216	-0.321358	-3.39265	0.00702104	0.0689601	-2.16891
307126	Mcm10	minichromosome maintenance 10 replication initiation factor	-1.6823	0.27472	-3.3938	0.00700751	0.0689601	-2.16716
360554	Rnf167	ring finger protein 167	-1.92788	-0.402807	-3.39508	0.00699263	0.0689601	-2.16524
360840	Srgap2	SLIT-ROBO Rho GTPase activating protein 2	-2.02088	0.119965	-3.39335	0.00701277	0.0689601	-2.16784
500069	Cep41	centrosomal protein 41	-1.80292	-0.259276	-3.39363	0.00700949	0.0689601	-2.16742
29606	Pcsk7	proprotein convertase subtilisin/kexin type 7	-1.96863	-0.0779638	-3.3872	0.00708503	0.0694916	-2.17713
360887	Coq8a	coenzyme Q8A	-1.55764	-0.339209	-3.38618	0.00709704	0.0695124	-2.17866
117505	Csrp3	cysteine and glycine rich protein 3	-1.77843	0.282356	-3.38424	0.00712008	0.0695444	-2.1816
306464	Cenpu	centromere protein U	-1.81212	0.196407	-3.38517	0.00710902	0.0695444	-2.18019
308404	Irf2bp1	interferon regulatory factor 2 binding protein 1	-1.59023	-0.408466	-3.38492	0.00711196	0.0695444	-2.18056
313949	Ldah	lipid droplet associated hydrolase	-1.76142	-0.413611	-3.38263	0.00713912	0.069682	-2.18401
25728	Apoe	apolipoprotein E	-2.31566	-0.0980594	-3.38042	0.00716549	0.0697072	-2.18735
304490	Anapc7	anaphase promoting complex subunit 7	-1.59775	0.122575	-3.38125	0.0071556	0.0697072	-2.1861
307956	Rbm34	RNA binding motif protein 34	-1.73188	0.372052	-3.38034	0.00716649	0.0697072	-2.18748
25749	Clcn5	chloride voltage-gated channel 5	-1.73523	0.419025	-3.3744	0.00723775	0.0697253	-2.19644
117024	Crym	crystallin, mu	-1.60942	-0.0802201	-3.37485	0.00723238	0.0697253	-2.19577
289083	Tsen15	tRNA splicing endonuclease subunit 15	-1.55076	-0.413474	-3.37667	0.00721047	0.0697253	-2.19302
309456	Wbp1l	WW domain binding protein 1-like	-1.9111	-0.304142	-3.37952	0.00717633	0.0697253	-2.18872
363198	Cenpq	centromere protein Q	-1.86246	0.0877437	-3.37539	0.00722585	0.0697253	-2.19495
682908	Rcc1	regulator of chromosome condensation 1	-2.00672	0.335309	-3.37715	0.00720472	0.0697253	-2.1923
293528	Nsmce4a	NSE4 homolog A, SMC5-SMC6 complex component	-2.12057	0.26574	-3.3736	0.00724743	0.0697708	-2.19765
303037	Spdl1	spindle apparatus coiled-coil protein 1	-1.98041	0.181949	-3.37268	0.00725859	0.0697827	-2.19904
100361939	Rnaseh2c	ribonuclease H2, subunit C	-1.83398	-0.37158	-3.373	0.00725465	0.0697827	-2.19855
81748	Pls3	plastin 3	-1.61109	0.338161	-3.37128	0.00727555	0.069898	-2.20116
313196	Ecpas	Ecm29 proteasome adaptor and scaffold	-1.8274	-0.546839	-3.37075	0.00728197	0.0699119	-2.20196
304388	Cldn15	claudin 15	-1.52474	0.645089	-3.36438	0.00735967	0.0703196	-2.21157
304558	Ttc28	tetratricopeptide repeat domain 28	-1.71029	-0.212213	-3.36634	0.00733569	0.0703196	-2.20861
313647	Hp1bp3	heterochromatin protein 1, binding protein 3	-1.50438	-0.624542	-3.364	0.00736444	0.0703196	-2.21216
317579	Utp14a	UTP14A small subunit processome component	-1.52426	0.67553	-3.36505	0.00735147	0.0703196	-2.21056
100362495	Haus5	HAUS augmin-like complex, subunit 5	-1.9334	-0.108922	-3.36502	0.00735191	0.0703196	-2.21061
100534597	Cenps	centromere protein S	-1.90051	-0.0714272	-3.36525	0.00734906	0.0703196	-2.21026
299828	Atp23	ATP23 metallopeptidase and ATP synthase assembly factor homolog	-1.46093	-0.488284	-3.36244	0.00738357	0.0703834	-2.21451
64042	Nmur2	neuromedin U receptor 2	-1.85724	-0.0881237	-3.36055	0.00740689	0.0703904	-2.21736
363291	Thap4	THAP domain containing 4	-1.52078	-0.466125	-3.3606	0.0074063	0.0703904	-2.21729
317252	Ercc6l	ERCC excision repair 6 like, spindle assembly checkpoint helicase	-1.94327	0.181813	-3.35974	0.00741699	0.0703967	-2.2186
100912924	Tigd2	tigger transposable element derived 2	-1.50566	-0.555844	-3.35969	0.00741755	0.0703967	-2.21867
363061	Sdhd	succinate dehydrogenase complex subunit D	-1.54168	-0.200379	-3.35754	0.0074442	0.070602	-2.22191
191595	Syt12	synaptotagmin 12	-1.55577	0.290072	-3.3567	0.00745467	0.070606	-2.22319
29533	Pxmp2	peroxisomal membrane protein 2	-1.61575	-0.516369	-3.35108	0.00752492	0.0708119	-2.23168
293135	Lrrc32	leucine rich repeat containing 32	-1.80094	-0.00609724	-3.34898	0.0075513	0.0708119	-2.23485
302669	Car5b	carbonic anhydrase 5B	-1.61188	0.485566	-3.35199	0.0075135	0.0708119	-2.23031
305614	Sptbn1	spectrin, beta, non-erythrocytic 1	-1.48091	0.587844	-3.35019	0.00753605	0.0708119	-2.23302
308845	Thap12	THAP domain containing 12	-1.51379	-0.54004	-3.34893	0.00755192	0.0708119	-2.23493
310326	Arse	arylsulfatase E	-1.87734	-0.0688622	-3.34923	0.00754812	0.0708119	-2.23447
313749	Nphp4	nephrocystin 4	-1.80034	0.447771	-3.35026	0.00753516	0.0708119	-2.23291
363082	Pdcd7	programmed cell death 7	-1.79948	0.0447999	-3.35229	0.00750967	0.0708119	-2.22984
100910508	Zfp41	zinc finger protein 41	-1.49389	-0.563267	-3.34926	0.00754783	0.0708119	-2.23444
25203	Ccnb1	cyclin B1	-2.00783	-0.0732475	-3.34547	0.00759573	0.0710805	-2.24017
50594	Nbl1	NBL1, DAN family BMP antagonist	-1.8256	0.0214189	-3.34593	0.00758987	0.0710805	-2.23947
312309	Zfp775	zinc finger protein 775	-1.90156	-0.21393	-3.3456	0.00759412	0.0710805	-2.23997
25315	Ephx1	epoxide hydrolase 1	-1.49521	-0.210877	-3.34205	0.00763925	0.0714287	-2.24534
310707	Chd1l	chromodomain helicase DNA binding protein 1-like	-1.72133	-0.647822	-3.34169	0.00764378	0.0714287	-2.24588
117186	Sh3bp5	SH3-domain binding protein 5	-1.72375	0.340981	-3.33867	0.00768245	0.0714641	-2.25045
312154	Ing3	inhibitor of growth family, member 3	-1.74909	0.311415	-3.3392	0.00767568	0.0714641	-2.24965
502306	Igsf23	immunoglobulin superfamily, member 23	-1.54591	0.749406	-3.34024	0.0076623	0.0714641	-2.24807
64041	Birc5	baculoviral IAP repeat-containing 5	-1.96511	-0.00500065	-3.33747	0.00769791	0.0715606	-2.25227
113956	Pecr	peroxisomal trans-2-enoyl-CoA reductase	-1.53853	-0.761424	-3.33661	0.00770893	0.0715684	-2.25357
117039	Gps1	G protein pathway suppressor 1	-1.5181	0.141695	-3.33427	0.00773912	0.0716995	-2.25711
501048	Poc1a	POC1 centriolar protein A	-1.78628	-0.679877	-3.33332	0.00775138	0.0716995	-2.25854
171146	Kcnh5	potassium voltage-gated channel subfamily H member 5	-1.7598	0.235092	-3.3321	0.0077672	0.071725	-2.26039
690585	Alyref	Aly/REF export factor	-1.85086	0.215155	-3.33176	0.0077717	0.071725	-2.26091
24182	Agtr2	angiotensin II receptor, type 2	-1.71121	-0.0354436	-3.33073	0.00778504	0.071801	-2.26246
678893	Susd6	sushi domain containing 6	-1.7172	-0.134492	-3.32954	0.00780049	0.0718964	-2.26426
114592	Aurkb	aurora kinase B	-1.90216	0.0756311	-3.32679	0.00783644	0.0719764	-2.26843
117521	Scaper	S-phase cyclin A-associated protein in the ER	-1.4345	0.203878	-3.32694	0.00783457	0.0719764	-2.26821
362906	Nudcd1	NudC domain containing 1	-1.52735	-0.279596	-3.32721	0.00783092	0.0719764	-2.26779
685179	Smarcc2	SWI/SNF related, matrix associated, actin dependent regulator of chromatin, subfamily c, member 2	-2.1894	-0.273565	-3.32721	0.00783096	0.0719764	-2.26779
24828	Hist1h2aa	histone cluster 1 H2A family member a	-1.86163	0.303099	-3.32327	0.00788274	0.071994	-2.27376
309565	Med23	mediator complex subunit 23	-1.68499	-0.121976	-3.32337	0.00788144	0.071994	-2.27361
368002	Baz1b	bromodomain adjacent to zinc finger domain, 1B	-1.78731	-0.454565	-3.32547	0.00785375	0.071994	-2.27042
287585	Ppm1d	protein phosphatase, Mg2+/Mn2+ dependent, 1D	-1.63912	-0.0127256	-3.32169	0.00790359	0.0721376	-2.27616
310074	Depdc1b	DEP domain containing 1B	-1.98119	0.103477	-3.31967	0.00793033	0.0722878	-2.27922
315843	Phip	pleckstrin homology domain interacting protein	-1.70354	0.602271	-3.32	0.007926	0.0722878	-2.27872
361551	Scgb1b30	secretoglobin, family 1B, member 30	-1.6625	-0.203378	-3.31642	0.00797355	0.0725877	-2.28414
24360	Fabp1	fatty acid binding protein 1	-1.93107	0.0871906	-3.31424	0.00800262	0.0727582	-2.28744
360482	Tfap4	transcription factor AP-4	-1.60001	0.137999	-3.31428	0.0080021	0.0727582	-2.28738
290842	Gins4	GINS complex subunit 4	-1.82667	0.425181	-3.31156	0.00803862	0.0729806	-2.2915
309174	Tigd3	tigger transposable element derived 3	-1.66443	-0.16757	-3.31155	0.00803881	0.0729806	-2.29152
362472	Cspp1	centrosome and spindle pole associated protein 1	-1.46621	0.23605	-3.30819	0.00808406	0.0732146	-2.29661
171293	Ctsd	cathepsin D	-1.62711	0.120959	-3.3074	0.00809471	0.0732639	-2.2978
295171	Sh3d19	SH3 domain containing 19	-1.69365	-0.356619	-3.30623	0.00811066	0.0733139	-2.29958
311130	Prkra	protein activator of interferon induced protein kinase EIF2AK2	-1.47817	-0.780888	-3.30653	0.00810654	0.0733139	-2.29912
64513	Pawr	pro-apoptotic WT1 regulator	-1.57242	-0.0109671	-3.30376	0.00814426	0.0734683	-2.30333
192178	Tnrc6b	trinucleotide repeat containing 6B	-1.46706	0.289749	-3.30371	0.00814489	0.0734683	-2.3034
311876	Pbx3	PBX homeobox 3	-1.80585	0.719693	-3.30365	0.00814567	0.0734683	-2.30349
363151	Ccdc12	coiled-coil domain containing 12	-1.95576	0.262579	-3.30343	0.00814864	0.0734683	-2.30382
307343	Fam210a	family with sequence similarity 210, member A	-1.65274	0.160644	-3.29979	0.0081985	0.073776	-2.30934
29699	Prkar2a	protein kinase cAMP-dependent type 2 regulatory subunit alpha	-1.8058	0.177211	-3.29802	0.00822287	0.0738112	-2.31203
286758	Aqp11	aquaporin 11	-1.7048	-0.291151	-3.29876	0.0082127	0.0738112	-2.31091
292155	Hs2st1	heparan sulfate 2-O-sulfotransferase 1	-1.44682	-0.516641	-3.2976	0.00822865	0.0738112	-2.31267
309312	Gldc	glycine decarboxylase	-1.67544	-0.46867	-3.29854	0.00821569	0.0738112	-2.31124
317203	Rps6ka6	ribosomal protein S6 kinase A6	-1.51868	-0.51934	-3.29791	0.00822437	0.0738112	-2.3122
360609	Cbx1	chromobox 1	-1.79173	-0.0849202	-3.29471	0.00826853	0.0740744	-2.31705
296501	Hat1	histone acetyltransferase 1	-1.64122	0.156934	-3.2939	0.00827969	0.0740801	-2.31827
85267	Slc24a3	solute carrier family 24 member 3	-1.67186	0.555009	-3.29217	0.00830377	0.074132	-2.3209
302553	Suv39h1	suppressor of variegation 3-9 homolog 1 (Drosophila)	-1.95022	0.256257	-3.29128	0.00831615	0.074132	-2.32225
683593	Jmy	junction mediating and regulatory protein, p53 cofactor	-1.53595	-0.475425	-3.29247	0.00829958	0.074132	-2.32044
29436	Tfpi	tissue factor pathway inhibitor	-1.5546	0.513975	-3.28779	0.00836482	0.0741632	-2.32754
29521	Scamp1	secretory carrier membrane protein 1	-1.56064	-0.608734	-3.28504	0.00840355	0.0741632	-2.33172
81658	Gabrp	gamma-aminobutyric acid type A receptor pi subunit	-1.93096	0.248203	-3.28883	0.00835038	0.0741632	-2.32597
117535	Chd4	chromodomain helicase DNA binding protein 4	-1.48607	0.292581	-3.28867	0.00835251	0.0741632	-2.3262
246284	Atrx	ATRX, chromatin remodeler	-1.45952	0.251341	-3.28994	0.00833478	0.0741632	-2.32428
298757	Atl2	atlastin GTPase 2	-1.82383	0.183233	-3.28656	0.00838213	0.0741632	-2.32941
305464	Depdc5	DEP domain containing 5	-1.77474	-0.204922	-3.28822	0.00835879	0.0741632	-2.32689
309060	Fam53b	family with sequence similarity 53, member B	-1.47626	-0.0710745	-3.28542	0.00839814	0.0741632	-2.33114
313598	Zmym4	zinc finger MYM-type containing 4	-1.55479	-0.539885	-3.28982	0.00833643	0.0741632	-2.32446
314399	Ubr7	ubiquitin protein ligase E3 component n-recognin 7 (putative)	-1.64877	0.119166	-3.28582	0.00839252	0.0741632	-2.33053
361151	Ufsp2	UFM1-specific peptidase 2	-1.47184	-0.448717	-3.28894	0.00834884	0.0741632	-2.32581
361374	Brd7	bromodomain containing 7	-1.5225	0.0221894	-3.28928	0.0083441	0.0741632	-2.32529
362769	Dglucy	D-glutamate cyclase	-1.57265	-0.130286	-3.28576	0.00839331	0.0741632	-2.33062
300258	Myg1	melanocyte proliferating gene 1	-1.63778	-0.627653	-3.28414	0.00841624	0.0741653	-2.33309
680006	Mad1l1	mitotic arrest deficient 1 like 1	-1.87405	-0.495933	-3.28394	0.00841895	0.0741653	-2.33338
25163	Cdkn2a	cyclin-dependent kinase inhibitor 2A	-1.51543	0.160023	-3.28175	0.00844994	0.0742157	-2.33671
292206	Trip13	thyroid hormone receptor interactor 13	-1.80562	0.388786	-3.2822	0.00844363	0.0742157	-2.33603
292680	Ccdc61	coiled-coil domain containing 61	-1.6045	0.246245	-3.28121	0.00845764	0.0742157	-2.33754
310483	Mlf1	myeloid leukemia factor 1	-1.73298	0.00449011	-3.28236	0.00844128	0.0742157	-2.33578
362100	Endog	endonuclease G	-1.65197	-0.0215648	-3.28298	0.00843253	0.0742157	-2.33484
103693392	LOC103693392	uncharacterized LOC103693392	-1.95217	0.60381	-3.28068	0.00846508	0.0742277	-2.33833
499570	Fabp12	fatty acid binding protein 12	-1.72266	0.00144841	-3.27917	0.00848651	0.0743587	-2.34062
685579	Rrm1	ribonucleotide reductase catalytic subunit M1	-1.71007	-0.117048	-3.27889	0.00849058	0.0743587	-2.34106
290744	Ing2	inhibitor of growth family, member 2	-1.65977	-0.12001	-3.27802	0.00850291	0.0744203	-2.34237
25366	Acvr2b	activin A receptor type 2B	-1.87575	0.219081	-3.27752	0.00851011	0.074437	-2.34314
293570	Abraxas2	abraxas 2, BRISC complex subunit	-1.50225	-0.117794	-3.2754	0.00854034	0.0746086	-2.34635
29366	Serpine2	serpin family E member 2	-1.52191	0.167021	-3.27247	0.00858234	0.0748097	-2.3508
361528	Ttc9b	tetratricopeptide repeat domain 9B	-1.85661	0.256916	-3.27231	0.00858463	0.0748097	-2.35104
29735	Slc16a7	solute carrier family 16 member 7	-1.69139	0.0303968	-3.26936	0.00862723	0.0749329	-2.35552
83826	Nr5a1	nuclear receptor subfamily 5, group A, member 1	-1.70653	-0.262856	-3.26902	0.00863209	0.0749329	-2.35603
294088	Pank1	pantothenate kinase 1	-1.67389	0.496594	-3.26884	0.0086348	0.0749329	-2.35632
361828	Specc1l	sperm antigen with calponin homology and coiled-coil domains 1-like	-1.66837	0.131413	-3.26854	0.00863917	0.0749329	-2.35678
102549342	LOC102549342	uncharacterized LOC102549342	-1.63302	0.606071	-3.2695	0.00862521	0.0749329	-2.35531
64824	Nab1	Ngfi-A binding protein 1	-1.47034	0.416636	-3.26743	0.00865517	0.0749999	-2.35845
298767	Dync2li1	dynein cytoplasmic 2 light intermediate chain 1	-1.52718	-0.356759	-3.26711	0.00865978	0.0749999	-2.35893
314642	Fzr1	fizzy and cell division cycle 20 related 1	-1.69541	0.261824	-3.26558	0.00868214	0.0751434	-2.36127
79248	Abca2	ATP binding cassette subfamily A member 2	-1.513	-0.322656	-3.26388	0.00870691	0.0752228	-2.36385
305687	Zfp503	zinc finger protein 503	-1.47324	-0.288636	-3.26418	0.0087025	0.0752228	-2.36339
100362311	Arhgap33	Rho GTPase activating protein 33	-1.50136	0.660637	-3.26256	0.00872613	0.0752963	-2.36585
304193	Arhgef18	Rho/Rac guanine nucleotide exchange factor 18	-1.6598	-0.0507131	-3.25993	0.00876469	0.0754104	-2.36984
362798	Ncapg2	non-SMC condensin II complex, subunit G2	-1.78198	0.392541	-3.2605	0.00875641	0.0754104	-2.36899
100362940	Snx21	sorting nexin family member 21	-1.60021	0.200007	-3.25983	0.00876616	0.0754104	-2.37
25497	Nup50	nucleoporin 50	-1.59954	0.686868	-3.2576	0.00879911	0.0754205	-2.3734
29146	Jag1	jagged 1	-1.55139	0.343739	-3.25602	0.00882245	0.0754205	-2.3758
29718	Kcnj10	potassium voltage-gated channel subfamily J member 10	-1.60974	-0.209785	-3.2555	0.00883015	0.0754205	-2.37659
54240	Chrnd	cholinergic receptor nicotinic delta subunit	-1.83793	0.468962	-3.25533	0.00883263	0.0754205	-2.37684
114505	Klf4	Kruppel like factor 4	-1.40898	0.052626	-3.25308	0.00886603	0.0754205	-2.38026
287935	RGD1308065	hypothetical LOC287935	-1.94382	-0.512044	-3.25396	0.00885289	0.0754205	-2.37892
290028	Osgep	O-sialoglycoprotein endopeptidase	-1.58729	0.0415082	-3.2539	0.00885387	0.0754205	-2.37902
294236	Gtf2h4	general transcription factor 2H subunit 4	-1.7298	-0.0979964	-3.2525	0.00887458	0.0754205	-2.38113
300983	Abhd14b	abhydrolase domain containing 14b	-1.61373	0.104633	-3.25371	0.00885658	0.0754205	-2.37929
314818	E2f7	E2F transcription factor 7	-1.62977	0.592816	-3.25794	0.00879402	0.0754205	-2.37287
361843	Aifm2	apoptosis inducing factor, mitochondria associated 2	-1.81858	-0.227245	-3.25339	0.00886134	0.0754205	-2.37978
363259	Obsl1	obscurin-like 1	-1.73404	0.0574003	-3.25433	0.00884742	0.0754205	-2.37836
681249	Fam72a	family with sequence similarity 72, member A	-1.85801	0.452279	-3.25561	0.0088284	0.0754205	-2.37641
691379	Ice2	interactor of little elongation complex ELL subunit 2	-1.43468	-0.663526	-3.25268	0.00887191	0.0754205	-2.38086
296370	Ctsa	cathepsin A	-1.79006	-0.353012	-3.25189	0.00888375	0.0754529	-2.38207
192273	Slc22a25	solute carrier family 22, member 25	-2.0982	-0.0425415	-3.25084	0.00889942	0.0754985	-2.38367
296469	Nkain4	Sodium/potassium transporting ATPase interacting 4	-1.42676	0.727345	-3.2491	0.00892541	0.0756696	-2.38631
84011	Atp9a	ATPase phospholipid transporting 9A (putative)	-1.52449	-0.466041	-3.246	0.00897196	0.0759591	-2.39102
305288	Cep135	centrosomal protein 135	-1.64441	-0.0390935	-3.24429	0.00899769	0.0760532	-2.39362
309144	Ppp6r3	protein phosphatase 6, regulatory subunit 3	-2.09701	0.212155	-3.24255	0.00902414	0.0761971	-2.39628
294410	Man1a1	mannosidase, alpha, class 1A, member 1	-1.56976	-0.0934451	-3.24198	0.00903277	0.0762123	-2.39714
497895	Mrnip	MRN complex interacting protein	-1.63874	-0.498177	-3.24107	0.00904657	0.076283	-2.39852
25084	Il4r	interleukin 4 receptor	-1.83638	0.0551268	-3.23963	0.00906845	0.0763759	-2.40071
300129	Cerk	ceramide kinase	-1.72022	-0.670169	-3.23781	0.00909615	0.0765285	-2.40348
361718	Naa40	N(alpha)-acetyltransferase 40, NatD catalytic subunit	-1.79408	0.3192	-3.23735	0.00910313	0.0765305	-2.40417
295334	Bcas2	BCAS2, pre-mRNA processing factor	-1.77771	0.0409901	-3.23697	0.009109	0.0765341	-2.40476
25283	Gclc	glutamate-cysteine ligase, catalytic subunit	-1.42879	-0.594704	-3.23218	0.00918257	0.0768887	-2.41204
81785	Ssrp1	structure specific recognition protein 1	-1.40153	-0.612228	-3.23209	0.009184	0.0768887	-2.41219
499966	Xrcc2	X-ray repair cross complementing 2	-1.75225	0.25608	-3.23157	0.00919195	0.0769094	-2.41297
24413	Nr3c1	nuclear receptor subfamily 3, group C, member 1	-1.49866	-0.617688	-3.23016	0.00921373	0.0770458	-2.41511
360600	Spag9	sperm associated antigen 9	-1.56987	0.534425	-3.22488	0.00929592	0.077687	-2.42316
311502	Kiz	kizuna centrosomal protein	-1.65145	0.107778	-3.22401	0.00930945	0.0777213	-2.42448
680262	Hyls1	HYLS1, centriolar and ciliogenesis associated	-1.77258	0.226701	-3.22391	0.00931108	0.0777213	-2.42464
53372	Nup54	nucleoporin 54	-1.68069	0.122405	-3.2216	0.00934721	0.0779766	-2.42814
60335	Tgm1	transglutaminase 1	-1.50401	0.547388	-3.22056	0.00936354	0.0780665	-2.42973
311266	Qser1	glutamine and serine rich 1	-1.92634	0.206639	-3.22012	0.00937052	0.0780784	-2.4304
360668	Sec14l1	SEC14-like lipid binding 1	-1.6815	0.143199	-3.21887	0.00939026	0.0781966	-2.43231
289168	Kifap3	kinesin-associated protein 3	-1.89384	0.221527	-3.21799	0.00940415	0.0782196	-2.43365
108350939	LOC108350939	uncharacterized LOC108350939	-1.89226	0.216791	-3.21799	0.00940414	0.0782196	-2.43365
29758	St6galnac3	ST6 N-acetylgalactosaminide alpha-2,6-sialyltransferase 3	-1.50951	-0.439661	-3.21684	0.00942221	0.0782791	-2.43539
299116	Sav1	salvador family WW domain containing protein 1	-1.79873	0.272606	-3.21683	0.00942244	0.0782791	-2.43541
100909912	LOC100909912	uncharacterized LOC100909912	-1.54346	0.234229	-3.21554	0.00944295	0.0784033	-2.43738
25448	Cenpi	centromere protein I	-1.84547	0.116904	-3.21298	0.00948366	0.0784853	-2.44128
25652	Ptgfr	prostaglandin F receptor	-1.41841	-0.283218	-3.21296	0.00948394	0.0784853	-2.4413
60433	Rfng	RFNG O-fucosylpeptide 3-beta-N-acetylglucosaminyltransferase	-1.69342	0.145348	-3.213	0.00948336	0.0784853	-2.44125
299203	Acyp1	acylphosphatase 1	-1.69043	-0.127957	-3.2127	0.0094881	0.0784853	-2.4417
302935	Ubn1	ubinuclein 1	-1.77966	0.458088	-3.21289	0.00948499	0.0784853	-2.4414
310344	Plk4	polo-like kinase 4	-1.79235	0.273096	-3.21246	0.00949189	0.0784853	-2.44206
292077	Sult5a1	sulfotransferase family 5A, member 1	-1.8599	-0.562358	-3.21099	0.00951531	0.0786326	-2.44429
170842	Tob1	transducer of ErbB-2.1	-1.54463	-0.0881183	-3.20962	0.00953725	0.0786644	-2.44638
294307	Kctd20	potassium channel tetramerization domain containing 20	-1.48268	0.0604669	-3.20919	0.00954415	0.0786644	-2.44704
300253	Eif4b	eukaryotic translation initiation factor 4B	-1.49941	-0.760747	-3.20901	0.00954711	0.0786644	-2.44732
310638	Ash1l	ASH1 like histone lysine methyltransferase	-1.70974	0.288468	-3.21024	0.00952734	0.0786644	-2.44544
298867	Klhl29	kelch-like family member 29	-1.56573	-0.58264	-3.20668	0.00958462	0.0789009	-2.45087
307726	Chd9	chromodomain helicase DNA binding protein 9	-1.71528	0.565565	-3.20653	0.00958704	0.0789009	-2.4511
83624	Ppig	peptidylprolyl isomerase G	-1.49513	-0.417601	-3.20545	0.00960441	0.0789365	-2.45274
680717	Zfp703	zinc finger protein 703	-1.6172	-0.699339	-3.20578	0.00959908	0.0789365	-2.45224
24409	Grin2a	glutamate ionotropic receptor NMDA type subunit 2A	-1.68968	0.0213694	-3.20155	0.00966761	0.0793033	-2.45868
58812	Apln	apelin	-1.49584	-0.215916	-3.20033	0.00968754	0.0793033	-2.46055
113955	Gpnmb	glycoprotein nmb	-1.96101	0.0345474	-3.20003	0.00969231	0.0793033	-2.46099
303057	Slu7	SLU7 homolog, splicing factor	-1.49666	0.0697804	-3.20004	0.00969225	0.0793033	-2.46099
304689	Serpinb11	serpin family B member 11	-1.72203	0.946583	-3.20126	0.00967232	0.0793033	-2.45912
365668	Mtrex	Mtr4 exosome RNA helicase	-1.66024	-0.335027	-3.20142	0.0096697	0.0793033	-2.45888
305544	Aftph	aftiphilin	-1.73171	-0.398555	-3.19637	0.00975216	0.0797002	-2.46657
100911574	LOC100911574	uncharacterized LOC100911574	-2.10658	0.31705	-3.19521	0.0097712	0.0798095	-2.46834
366265	Rab22a	RAB22A, member RAS oncogene family	-1.66496	-0.000946323	-3.19393	0.00979231	0.0799355	-2.47029
29278	Lasp1	LIM and SH3 protein 1	-1.61792	0.574548	-3.1927	0.00981269	0.0799379	-2.47218
29543	Timp2	TIMP metallopeptidase inhibitor 2	-1.41473	0.616474	-3.19219	0.00982102	0.0799379	-2.47295
83474	Tfam	transcription factor A, mitochondrial	-1.4154	-0.658956	-3.19238	0.0098179	0.0799379	-2.47266
307805	Cenpt	centromere protein T	-2.04701	0.250644	-3.19303	0.00980722	0.0799379	-2.47167
29228	Nfic	nuclear factor I/C	-1.56155	-0.159058	-3.18811	0.00988867	0.08021	-2.47917
367562	Gaa	glucosidase, alpha, acid	-1.81454	-0.168238	-3.18837	0.00988429	0.08021	-2.47876
84390	Hcn1	hyperpolarization-activated cyclic nucleotide-gated potassium channel 1	-1.61415	-0.524057	-3.18691	0.00990861	0.0802791	-2.48099
289150	Cenpl	centromere protein L	-1.9092	0.266004	-3.18652	0.00991512	0.0802857	-2.48159
24855	Tsc2	TSC complex subunit 2	-1.42652	-0.186848	-3.18454	0.0099483	0.0803711	-2.48461
290280	Xpo4	exportin 4	-1.96464	0.0229884	-3.18517	0.00993768	0.0803711	-2.48364
310958	Zzz3	zinc finger, ZZ-type containing 3	-1.66728	-0.428996	-3.18332	0.0099687	0.0804417	-2.48647
29428	Celf2	CUGBP, Elav-like family member 2	-1.39128	0.723943	-3.18294	0.0099751	0.0804471	-2.48705
301709	Arhgap28	Rho GTPase activating protein 28	-1.40544	0.803338	-3.18259	0.00998104	0.0804489	-2.48759
300060	Apol11a	apolipoprotein L 11a	-1.41538	-0.0476609	-3.17773	0.010063	0.0810167	-2.495
293144	Pold3	DNA polymerase delta 3, accessory subunit	-1.58273	-0.141368	-3.17256	0.0101509	0.0815843	-2.50288
287454	Alox12	arachidonate 12-lipoxygenase, 12S type	-1.8999	-0.215224	-3.17117	0.0101748	0.0816829	-2.50501
685243	Ackr4	atypical chemokine receptor 4	-1.91206	-0.340863	-3.17014	0.0101923	0.0817304	-2.50657
290519	Thoc3	THO complex 3	-1.71738	-0.362732	-3.16977	0.0101988	0.0817354	-2.50714
296380	Arfgef2	ADP ribosylation factor guanine nucleotide exchange factor 2	-1.67477	0.126255	-3.16863	0.0102183	0.0818455	-2.50887
305236	Cxcl11	C-X-C motif chemokine ligand 11	-1.62308	-0.408977	-3.16811	0.0102273	0.0818705	-2.50967
497983	Fam117a	family with sequence similarity 117, member A	-1.61256	0.316214	-3.16615	0.0102611	0.0820481	-2.51266
25035	Cyb5r3	cytochrome b5 reductase 3	-1.37432	0.740962	-3.16351	0.0103069	0.0823202	-2.51669
307514	Epb41l4a	erythrocyte membrane protein band 4.1 like 4A	-1.78047	0.508785	-3.16383	0.0103014	0.0823202	-2.51621
24514	Jak2	Janus kinase 2	-1.74625	-0.0250083	-3.16119	0.0103472	0.0824555	-2.52023
24624	Pccb	propionyl-CoA carboxylase subunit beta	-1.58304	-0.166746	-3.16028	0.0103631	0.0825355	-2.52162
498222	LOC498222	similar to specifically androgen-regulated protein	-1.43672	0.116858	-3.15958	0.0103753	0.0825859	-2.52269
688990	Trnp1	TMF1-regulated nuclear protein 1	-1.78566	-0.546496	-3.15701	0.0104204	0.0828158	-2.52661
314169	Togaram1	TOG array regulator of axonemal microtubules 1	-1.46829	-0.394847	-3.15635	0.0104319	0.0828482	-2.52761
306873	Rreb1	ras responsive element binding protein 1	-1.6819	0.347814	-3.15591	0.0104397	0.082864	-2.5283
298095	Prpf4	pre-mRNA processing factor 4	-1.64641	0.126959	-3.15486	0.0104581	0.0829161	-2.52989
499088	Dact3	dishevelled-binding antagonist of beta-catenin 3	-1.42355	0.0223596	-3.15493	0.0104569	0.0829161	-2.52979
360912	Helq	helicase, POLQ-like	-1.81879	-0.321261	-3.15419	0.0104699	0.0829497	-2.53091
360960	Hmx1	H6 family homeobox 1	-1.99087	0.117028	-3.15396	0.0104741	0.0829497	-2.53127
261730	Aurka	aurora kinase A	-1.91702	0.0404959	-3.15182	0.0105119	0.0830615	-2.53453
303653	Cdc42ep4	CDC42 effector protein 4	-1.57482	0.359791	-3.1523	0.0105035	0.0830615	-2.53381
305452	Fam193a	family with sequence similarity 193, member A	-1.66714	0.039453	-3.15084	0.0105293	0.0831522	-2.53603
316406	RGD1306941	similar to CG31122-PA	-1.72891	0.043454	-3.14869	0.0105674	0.0834067	-2.53931
25604	Pcmt1	protein-L-isoaspartate (D-aspartate) O-methyltransferase 1	-1.725	0.113709	-3.14658	0.0106052	0.083518	-2.54254
314870	Irak3	interleukin-1 receptor-associated kinase 3	-1.52771	0.00979109	-3.14657	0.0106053	0.083518	-2.54255
360748	Prkdc	protein kinase, DNA-activated, catalytic subunit	-1.60454	0.0530153	-3.14679	0.0106013	0.083518	-2.54221
498982	RGD1560020_predicted	similar to Myb proto-oncogene protein (C-myb) (predicted)	-1.61894	0.392574	-3.14709	0.0105961	0.083518	-2.54176
311391	Cep152	centrosomal protein 152	-1.5619	0.454945	-3.14543	0.0106257	0.0836321	-2.54429
304477	Kntc1	kinetochore associated 1	-1.53194	0.102751	-3.14416	0.0106485	0.0836707	-2.54623
89829	Socs3	suppressor of cytokine signaling 3	-1.79417	-0.144195	-3.14363	0.0106581	0.0836994	-2.54705
65205	Mmp16	matrix metallopeptidase 16	-1.50593	-0.239731	-3.1423	0.010682	0.0838407	-2.54908
296634	Nup214	nucleoporin 214	-1.6644	0.401579	-3.14143	0.0106977	0.08387	-2.55041
83726	Ctcf	CCCTC-binding factor	-1.77621	-0.426446	-3.13941	0.010734	0.0839549	-2.55348
116590	Mapk1	mitogen activated protein kinase 1	-1.57551	0.107778	-3.13918	0.0107384	0.0839549	-2.55384
291927	Orc6	origin recognition complex, subunit 6	-1.7045	0.347605	-3.14013	0.010721	0.0839549	-2.55238
364240	Dnajc9	DnaJ heat shock protein family (Hsp40) member C9	-1.82026	-0.223861	-3.13975	0.010728	0.0839549	-2.55297
25270	Abcd3	ATP binding cassette subfamily D member 3	-1.48269	-0.268483	-3.13498	0.0108146	0.0843771	-2.56025
81808	Nr2f1	nuclear receptor subfamily 2, group F, member 1	-1.62618	-0.631412	-3.13477	0.0108185	0.0843771	-2.56058
501101	Lrrc73	leucine rich repeat containing 73	-1.65728	0.263657	-3.13372	0.0108377	0.0844032	-2.56219
65207	Rhag	Rh-associated glycoprotein	-1.78865	0.267639	-3.1322	0.0108655	0.0844599	-2.56451
79214	Galnt1	polypeptide N-acetylgalactosaminyltransferase 1	-1.45483	0.482338	-3.13174	0.0108739	0.0844599	-2.56521
308757	Man2a2	mannosidase, alpha, class 2A, member 2	-1.54984	0.335267	-3.13152	0.0108779	0.0844599	-2.56554
361348	Mro	maestro	-1.55606	-0.199744	-3.13232	0.0108632	0.0844599	-2.56432
682469	Kdm3b	lysine demethylase 3B	-1.5896	0.110922	-3.12812	0.0109405	0.0847813	-2.57074
685834	Znf740	zinc finger protein 740	-2.04594	-0.144033	-3.1283	0.0109371	0.0847813	-2.57046
681944	Mpnd	MPN domain containing	-1.59218	0.442532	-3.12703	0.0109605	0.0848899	-2.5724
497886	C1qtnf2	C1q and TNF related 2	-1.48481	-0.150818	-3.12469	0.011004	0.0849925	-2.57598
25531	Rab3a	RAB3A, member RAS oncogene family	-1.37664	-0.659543	-3.12186	0.0110567	0.0850047	-2.58031
296840	Rbm48	RNA binding motif protein 48	-1.60535	0.0988361	-3.12383	0.0110199	0.0850047	-2.57729
301250	Mrpl14	mitochondrial ribosomal protein L14	-1.77739	-0.0159786	-3.12006	0.0110902	0.0850047	-2.58305
310946	Lrrc40	leucine rich repeat containing 40	-1.57231	-0.636597	-3.12148	0.0110637	0.0850047	-2.58089
311338	Rpap1	RNA polymerase II associated protein 1	-1.44813	0.040303	-3.12027	0.0110864	0.0850047	-2.58274
311604	Zhx3	zinc fingers and homeoboxes 3	-1.95537	0.174793	-3.12186	0.0110566	0.0850047	-2.5803
315352	Nxt2	nuclear transport factor 2-like export factor 2	-1.59381	-0.0740297	-3.12203	0.0110534	0.0850047	-2.58004
361346	LOC361346	similar to chromosome 18 open reading frame 54	-1.68231	-0.0530456	-3.12152	0.0110631	0.0850047	-2.58083
100364027	Hkdc1	hexokinase domain containing 1	-1.7895	0.783281	-3.12071	0.0110781	0.0850047	-2.58206
114512	Aatf	apoptosis antagonizing transcription factor	-1.47257	-0.226723	-3.11367	0.0112106	0.0853784	-2.59283
170551	Slc5a6	solute carrier family 5 member 6	-1.50847	-0.232936	-3.11402	0.011204	0.0853784	-2.5923
288652	Rilpl2	Rab interacting lysosomal protein-like 2	-1.93118	-0.287533	-3.11579	0.0111705	0.0853784	-2.58959
294250	Prrc2a	proline-rich coiled-coil 2A	-1.51645	0.416416	-3.11454	0.0111942	0.0853784	-2.5915
315664	Kdelc2	KDEL motif containing 2	-1.47465	-0.635956	-3.11363	0.0112112	0.0853784	-2.59288
360761	Lnx2	ligand of numb-protein X 2	-1.45235	-0.471311	-3.11495	0.0111864	0.0853784	-2.59087
498727	Nol7	nucleolar protein 7	-1.91137	0.174726	-3.11368	0.0112103	0.0853784	-2.5928
362316	Cdk14	cyclin-dependent kinase 14	-2.0788	-0.101593	-3.11283	0.0112264	0.0853968	-2.5941
310838	Bcar3	BCAR3, NSP family adaptor protein	-1.67753	-0.560346	-3.10829	0.0113127	0.0857756	-2.60105
360874	Tada1	transcriptional adaptor 1	-1.5415	-0.19057	-3.10847	0.0113095	0.0857756	-2.60078
499126	Igflr1	IGF-like family receptor 1	-1.43103	0.476579	-3.10898	0.0112996	0.0857756	-2.59999
499883	Gabpb1	GA binding protein transcription factor subunit beta 1	-1.6597	-0.671313	-3.10951	0.0112896	0.0857756	-2.59919
306825	Mylip	myosin regulatory light chain interacting protein	-1.36179	0.683341	-3.107	0.0113375	0.0858565	-2.60302
106456572	Crnde	colorectal neoplasia differentially expressed	-1.80131	-0.43193	-3.10732	0.0113313	0.0858565	-2.60253
25575	Scgb1a1	secretoglobin family 1A member 1	-2.04056	-0.278801	-3.10535	0.0113691	0.0858946	-2.60555
288058	Hacd2	3-hydroxyacyl-CoA dehydratase 2	-1.3744	-0.31771	-3.10492	0.0113773	0.0858946	-2.6062
296368	Ube2c	ubiquitin-conjugating enzyme E2C	-2.041	-0.0469324	-3.10512	0.0113736	0.0858946	-2.60591
313087	Cpne3	copine 3	-1.60088	0.295758	-3.10544	0.0113674	0.0858946	-2.60541
58919	Ccnd1	cyclin D1	-1.39144	0.361354	-3.10385	0.011398	0.0859416	-2.60784
63878	Stc2	stanniocalcin 2	-1.42198	-0.1571	-3.10417	0.0113917	0.0859416	-2.60735
85251	Col18a1	collagen type XVIII alpha 1 chain	-1.44007	-0.270448	-3.10342	0.0114062	0.0859416	-2.6085
295692	Nup35	nucleoporin 35	-1.79223	0.212791	-3.10333	0.011408	0.0859416	-2.60864
361074	Slc25a30	solute carrier family 25, member 30	-1.42288	-0.228414	-3.10025	0.0114675	0.0861992	-2.61335
360498	Jmjd8	jumonji domain containing 8	-1.74617	0.382629	-3.09926	0.0114866	0.0862109	-2.61486
292462	Lrp11	LDL receptor related protein 11	-1.4358	-0.181319	-3.0986	0.0114994	0.0862607	-2.61587
297387	Mob1a	MOB kinase activator 1A	-1.43814	0.582606	-3.09788	0.0115135	0.0862757	-2.61697
303764	RGD1310429	similar to Protein Njmu-R1	-1.67002	0.382907	-3.0967	0.0115364	0.0863083	-2.61878
304648	Asf1b	anti-silencing function 1B histone chaperone	-1.77897	0.203848	-3.09674	0.0115357	0.0863083	-2.61872
308003	Rab11fip2	RAB11 family interacting protein 2	-1.39822	0.393322	-3.09625	0.0115452	0.0863282	-2.61947
246327	Prim1	DNA primase subunit 1	-1.68435	-0.163083	-3.09576	0.0115547	0.0863535	-2.62022
25356	Cntn2	contactin 2	-1.48011	-0.789637	-3.09485	0.0115724	0.086394	-2.6216
298590	Klhdc7a	kelch domain containing 7A	-1.51311	-0.442904	-3.09442	0.0115809	0.0864117	-2.62227
102556325	LOC102556325	uncharacterized LOC102556325	-1.66129	-0.366727	-3.0932	0.0116049	0.0865442	-2.62414
306599	Tubgcp3	tubulin, gamma complex associated protein 3	-1.90723	-0.493941	-3.09119	0.0116443	0.0866087	-2.62721
689710	Heg1	heart development protein with EGF-like domains 1	-1.54724	0.3733	-3.09138	0.0116405	0.0866087	-2.62691
498945	Zfp90	zinc finger protein 90	-1.55149	-0.1464	-3.08937	0.0116801	0.0868293	-2.62999
691170	LOC691170	similar to zinc finger protein 84 (HPF2)	-1.55901	-0.761706	-3.08882	0.011691	0.0868644	-2.63084
363002	Smarcd1	SWI/SNF related, matrix associated, actin dependent regulator of chromatin, subfamily d, member 1	-1.92696	0.0796054	-3.08842	0.011699	0.0868775	-2.63145
117514	Txnip	thioredoxin interacting protein	-1.36031	0.950116	-3.08644	0.0117382	0.0870766	-2.63448
24831	Thrb	thyroid hormone receptor beta	-1.45784	0.0647128	-3.08582	0.0117505	0.0871221	-2.63543
58946	Robo1	roundabout guidance receptor 1	-1.55243	-0.432576	-3.08462	0.0117742	0.0872061	-2.63726
56781	Myl1	myosin, light chain 1	-1.43827	0.29758	-3.08082	0.0118502	0.0874595	-2.64308
304670	Tnpo2	transportin 2	-1.65143	0.519805	-3.08073	0.011852	0.0874595	-2.64322
309475	Tm9sf3	transmembrane 9 superfamily member 3	-1.62397	0.0945323	-3.08114	0.0118437	0.0874595	-2.64259
360829	Ankle2	ankyrin repeat and LEM domain containing 2	-1.63858	0.189481	-3.07761	0.0119145	0.0877508	-2.64798
366669	Syne2	spectrin repeat containing nuclear envelope protein 2	-2.18253	-0.158776	-3.07767	0.0119134	0.0877508	-2.6479
81708	Aldh6a1	aldehyde dehydrogenase 6 family, member A1	-1.55756	0.214763	-3.07487	0.0119698	0.0878525	-2.65218
292905	Hrc	histidine rich calcium binding protein	-1.73669	-0.0223967	-3.07467	0.0119739	0.0878525	-2.65249
307133	Hspa14	heat shock protein family A, member 14	-1.96074	-0.278956	-3.07597	0.0119477	0.0878525	-2.6505
311182	Nup160	nucleoporin 160	-1.54188	0.670651	-3.07637	0.0119396	0.0878525	-2.64989
364144	Fryl	FRY like transcription coactivator	-1.76282	0.142335	-3.07486	0.0119701	0.0878525	-2.6522
292729	Snrpa	small nuclear ribonucleoprotein polypeptide A	-1.47268	0.202502	-3.07415	0.0119844	0.0878782	-2.65328
300791	Spg21	SPG21, maspardin	-2.03619	-0.359929	-3.07388	0.0119899	0.0878782	-2.6537
361930	Bbs7	Bardet-Biedl syndrome 7	-1.77939	0.440737	-3.07253	0.0120173	0.0879875	-2.65577
306792	S1pr3	sphingosine-1-phosphate receptor 3	-1.50327	0.249096	-3.07087	0.0120512	0.0880975	-2.65831
362412	Rad18	RAD18 E3 ubiquitin protein ligase	-1.71182	0.161714	-3.07105	0.0120475	0.0880975	-2.65804
365875	Bola1	bolA family member 1	-1.55187	-0.385451	-3.0704	0.0120607	0.0881216	-2.65903
304962	Atf6	activating transcription factor 6	-1.75399	0.502918	-3.06655	0.0121395	0.0884708	-2.66492
305391	Med28	mediator complex subunit 28	-1.74786	-0.67831	-3.06671	0.0121361	0.0884708	-2.66467
689399	Cenpw	centromere protein W	-1.90759	-0.178929	-3.06733	0.0121234	0.0884708	-2.66372
307148	Nsun6	NOP2/Sun RNA methyltransferase family member 6	-2.00753	0.363022	-3.06598	0.0121512	0.0884738	-2.6658
361409	Rfwd3	ring finger and WD repeat domain 3	-1.93827	0.252118	-3.06589	0.012153	0.0884738	-2.66593
25707	Cntf	ciliary neurotrophic factor	-1.73362	0.743736	-3.06445	0.0121826	0.0885519	-2.66813
313477	Zfyve9	zinc finger FYVE-type containing 9	-1.93257	0.045457	-3.06282	0.0122164	0.08866	-2.67064
308140	Tfb1m	transcription factor B1, mitochondrial	-1.48897	0.632367	-3.06147	0.0122443	0.0887884	-2.67271
116658	Cntn4	contactin 4	-1.44288	-0.575352	-3.05854	0.0123051	0.0888259	-2.6772
307639	Gins3	GINS complex subunit 3	-1.76635	0.206494	-3.05892	0.0122971	0.0888259	-2.67661
313108	Mms22l	MMS22-like, DNA repair protein	-1.72116	0.261184	-3.05837	0.0123087	0.0888259	-2.67746
362599	Trappc3	trafficking protein particle complex 3	-1.65757	-0.230869	-3.05935	0.0122881	0.0888259	-2.67594
363294	Twsg1	twisted gastrulation BMP signaling modulator 1	-1.41175	0.0648165	-3.06004	0.0122738	0.0888259	-2.67489
497811	Xdh	xanthine dehydrogenase	-1.38538	-0.26581	-3.05838	0.0123085	0.0888259	-2.67744
304577	Ung	uracil-DNA glycosylase	-1.38658	0.316113	-3.05773	0.0123219	0.0888279	-2.67843
292244	Mrpl18	mitochondrial ribosomal protein L18	-1.68198	-0.059543	-3.0559	0.01236	0.0889682	-2.68123
295284	Rbm8a	RNA binding motif protein 8A	-1.49778	-0.798339	-3.05466	0.0123861	0.0890189	-2.68313
308384	Sae1	SUMO1 activating enzyme subunit 1	-1.47101	-0.0790138	-3.05392	0.0124015	0.0890845	-2.68426
25464	Icam1	intercellular adhesion molecule 1	-1.41501	0.717307	-3.05342	0.012412	0.0891142	-2.68503
315136	Cbx6	chromobox 6	-1.34452	0.0796275	-3.05253	0.0124307	0.0892031	-2.68639
302554	Glod5	glyoxalase domain containing 5	-1.41968	-0.845941	-3.05186	0.0124449	0.0892577	-2.68742
690987	Gys1	glycogen synthase 1	-1.48465	-0.175692	-3.05157	0.012451	0.0892577	-2.68787
296708	Olfml2a	olfactomedin-like 2A	-1.35806	-0.237912	-3.04801	0.0125263	0.0894847	-2.69332
300944	Xrn1	5'-3' exoribonuclease 1	-1.72889	0.0224222	-3.04785	0.0125295	0.0894847	-2.69356
311020	Rbm43	RNA binding motif protein 43	-1.34814	-0.390993	-3.04767	0.0125335	0.0894847	-2.69385
315958	Stag1	stromal antigen 1	-1.63395	0.190025	-3.04929	0.0124992	0.0894847	-2.69137
364410	Kctd9	potassium channel tetramerization domain containing 9	-1.33451	0.977908	-3.04802	0.012526	0.0894847	-2.6933
294667	Poc5	POC5 centriolar protein	-1.53721	-0.00960679	-3.04687	0.0125504	0.0895591	-2.69506
24672	Ppp2ca	protein phosphatase 2 catalytic subunit alpha	-1.41801	-0.603847	-3.04533	0.0125831	0.0897406	-2.69743
84404	Gemin2	gem (nuclear organelle) associated protein 2	-1.36079	-0.42637	-3.04444	0.0126022	0.0897406	-2.6988
301514	Bcs1l	BCS1 homolog, ubiquinol-cytochrome c reductase complex chaperone	-1.45677	-0.000221909	-3.04388	0.0126141	0.0897406	-2.69965
360942	Pcdh7	protocadherin 7	-1.35629	0.283241	-3.044	0.0126116	0.0897406	-2.69947
102548514	LOC102548514	crooked neck-like protein 1-like	-1.34867	-0.652507	-3.04476	0.0125952	0.0897406	-2.6983
307495	LOC307495	similar to biliverdin reductase B (flavin reductase (NADPH))	-1.45065	0.784316	-3.0434	0.0126243	0.0897681	-2.70038
29479	Odf2	outer dense fiber of sperm tails 2	-1.81685	0.303194	-3.04222	0.0126495	0.0898563	-2.70219
641316	Aldh4a1	aldehyde dehydrogenase 4 family, member A1	-1.42138	-0.23133	-3.04155	0.0126639	0.0899132	-2.70322
25574	Ubtf	upstream binding transcription factor	-1.74308	-0.214781	-3.0407	0.0126822	0.0899643	-2.70453
287726	Rdm1	RAD52 motif containing 1	-1.46608	-0.631699	-3.03917	0.012715	0.0900941	-2.70687
688634	Kat6b	lysine acetyltransferase 6B	-1.52177	0.500535	-3.03887	0.0127216	0.0900951	-2.70733
24312	Dhfr	dihydrofolate reductase	-1.64406	-0.290086	-3.03665	0.0127694	0.0902517	-2.71073
64679	Tgm4	transglutaminase 4	-1.63635	0.457657	-3.03693	0.0127633	0.0902517	-2.7103
680702	Ripply1	ripply transcriptional repressor 1	-1.53518	-0.177585	-3.03592	0.0127852	0.090303	-2.71185
102554879	LOC102554879	uncharacterized LOC102554879	-1.7248	-0.0448975	-3.03572	0.0127894	0.090303	-2.71215
688811	Slc25a28	solute carrier family 25 member 28	-1.40288	0.645229	-3.03533	0.0127979	0.090317	-2.71274
303599	Tanc2	tetratricopeptide repeat, ankyrin repeat and coiled-coil containing 2	-1.53373	-0.639435	-3.03436	0.012819	0.0903306	-2.71424
361400	Nfatc3	nuclear factor of activated T-cells 3	-1.64329	-0.771128	-3.03437	0.0128188	0.0903306	-2.71422
25641	Igfbp6	insulin-like growth factor binding protein 6	-1.37075	-0.178943	-3.03338	0.0128403	0.0903448	-2.71574
79216	Gdf10	growth differentiation factor 10	-1.60002	0.91534	-3.03358	0.0128359	0.0903448	-2.71543
303304	Sgsm2	small G protein signaling modulator 2	-1.61016	0.137957	-3.03384	0.0128303	0.0903448	-2.71503
29467	Ddit3	DNA-damage inducible transcript 3	-1.87478	0.606761	-3.03243	0.0128609	0.0903583	-2.71719
83799	Dpp7	dipeptidylpeptidase 7	-1.93337	-0.550617	-3.0324	0.0128615	0.0903583	-2.71724
361226	Cd83	CD83 molecule	-1.50958	-0.400415	-3.03269	0.0128553	0.0903583	-2.7168
501103	Slc35b2	solute carrier family 35 member B2	-1.68087	0.261845	-3.03205	0.0128692	0.0903674	-2.71778
84490	Fen1	flap structure-specific endonuclease 1	-1.80174	0.430844	-3.03055	0.0129019	0.0905062	-2.72007
301624	D2hgdh	D-2-hydroxyglutarate dehydrogenase	-1.73596	-0.416181	-3.02903	0.0129353	0.0906951	-2.72241
300988	Tex264	testis expressed 264	-1.62751	-0.752305	-3.02867	0.0129431	0.0907048	-2.72296
294595	Ttc37	tetratricopeptide repeat domain 37	-1.72735	0.0434261	-3.02802	0.0129573	0.0907595	-2.72396
294518	Sesn1	sestrin 1	-1.77307	0.0947591	-3.02701	0.0129796	0.0908701	-2.72551
317232	Magee1	MAGE family member E1	-1.73395	-0.0232055	-3.0264	0.0129928	0.0909173	-2.72643
362519	Smc2	structural maintenance of chromosomes 2	-1.8773	-0.222974	-3.02396	0.0130467	0.0912035	-2.73018
117059	Calb2	calbindin 2	-1.74112	0.28914	-3.02355	0.0130558	0.0912218	-2.73081
64665	Flot1	flotillin 1	-1.55681	0.302437	-3.01815	0.0131757	0.0913743	-2.73908
83810	Trpv1	transient receptor potential cation channel, subfamily V, member 1	-1.53715	-0.00525514	-3.01888	0.0131594	0.0913743	-2.73796
288923	Dhps	deoxyhypusine synthase	-1.65405	-0.439521	-3.02124	0.0131069	0.0913743	-2.73435
291975	Enkd1	enkurin domain containing 1	-1.54975	-0.810353	-3.01711	0.013199	0.0913743	-2.74068
292100	RGD1562218	similar to RIKEN cDNA 0610039J04	-1.5747	-0.390161	-3.01921	0.0131521	0.0913743	-2.73746
305000	Exo1	exonuclease 1	-1.5978	0.30587	-3.01832	0.013172	0.0913743	-2.73883
305910	Pspc1	paraspeckle component 1	-1.59024	-0.817744	-3.01749	0.0131904	0.0913743	-2.74009
305941	Sgcg	sarcoglycan, gamma	-1.66451	0.0747822	-3.01918	0.0131526	0.0913743	-2.7375
307098	Net1	neuroepithelial cell transforming 1	-1.85445	0.131457	-3.01905	0.0131555	0.0913743	-2.7377
313510	Atpaf1	ATP synthase mitochondrial F1 complex assembly factor 1	-1.32157	-0.226175	-3.01702	0.013201	0.0913743	-2.74082
314478	Ahnak2	AHNAK nucleoprotein 2	-1.42433	-0.368981	-3.0171	0.0131991	0.0913743	-2.74069
360560	RGD1304728	similar to 4933427D14Rik protein	-1.35647	-0.328624	-3.01901	0.0131565	0.0913743	-2.73776
362087	Ubac1	UBA domain containing 1	-1.65942	-0.0274772	-3.01965	0.0131422	0.0913743	-2.73678
103692723	LOC103692723	Ig gamma-2A chain C region-like	-1.44063	-0.205784	-3.01978	0.0131395	0.0913743	-2.73659
65160	Clns1a	chloride nucleotide-sensitive channel 1A	-1.39728	-0.68883	-3.01577	0.013229	0.0914331	-2.74274
297176	Mad2l1	mitotic arrest deficient 2 like 1	-1.77271	0.140672	-3.01536	0.0132381	0.0914511	-2.74336
81805	Suox	sulfite oxidase	-1.44897	-0.13857	-3.01487	0.0132491	0.0914822	-2.74411
294009	Cuedc2	CUE domain containing 2	-1.60536	-0.824826	-3.01416	0.013265	0.0915467	-2.7452
290925	Coprs	coordinator of PRMT5 and differentiation stimulator	-1.35759	-0.303755	-3.01283	0.013295	0.091574	-2.74724
500532	Rnf220	ring finger protein 220	-1.51862	-0.617663	-3.01296	0.0132921	0.091574	-2.74705
313056	Snrnp40	small nuclear ribonucleoprotein U5 subunit 40	-1.50638	0.129547	-3.01244	0.0133039	0.0915902	-2.74785
294408	Asf1a	anti-silencing function 1A histone chaperone	-1.79071	-0.216653	-3.01092	0.013338	0.0916908	-2.75017
500110	Zfp467	zinc finger protein 467	-1.38726	-0.402982	-3.01121	0.0133316	0.0916908	-2.74973
312225	Wdr91	WD repeat domain 91	-1.68515	-0.195794	-3.01021	0.0133541	0.0916975	-2.75126
313842	Hnrnpll	heterogeneous nuclear ribonucleoprotein L-like	-1.80041	-0.34579	-3.01055	0.0133464	0.0916975	-2.75073
170920	Map4k3	mitogen-activated protein kinase kinase kinase kinase 3	-1.93235	-0.300233	-3.00935	0.0133735	0.0917554	-2.75257
29636	F2rl2	coagulation factor II (thrombin) receptor-like 2	-1.73652	-0.232869	-3.00852	0.0133924	0.0917563	-2.75385
498406	Mrps24	mitochondrial ribosomal protein S24	-1.3752	-0.340648	-3.00848	0.0133932	0.0917563	-2.7539
102554996	LOC102554996	uncharacterized LOC102554996	-1.95602	-0.267173	-3.00804	0.0134033	0.0917645	-2.75458
293042	Sema4b	semaphorin 4B	-1.59294	-0.403101	-3.00712	0.0134242	0.0918342	-2.75599
24434	Gusb	glucuronidase, beta	-1.33463	-0.494045	-3.00494	0.013474	0.0920973	-2.75935
363272	Pde6d	phosphodiesterase 6D	-1.38012	-0.590158	-3.00429	0.0134888	0.0920973	-2.76034
497863	Tmem186	transmembrane protein 186	-1.34898	-0.355493	-3.00442	0.0134858	0.0920973	-2.76014
58845	Igbp1	immunoglobulin binding protein 1	-1.35892	-0.748364	-3.00311	0.0135157	0.0922362	-2.76215
102555751	LOC102555751	uncharacterized LOC102555751	-1.48974	-0.17489	-3.00165	0.0135493	0.0923754	-2.76439
314416	Ak7	adenylate kinase 7	-1.43175	0.216672	-3.00068	0.0135716	0.0924023	-2.76588
314600	Zfp955a	zinc finger protein 955A	-1.80814	0.045916	-3.00005	0.0135861	0.0924472	-2.76684
311630	Zswim3	zinc finger, SWIM-type containing 3	-1.60787	0.18665	-2.99951	0.0135984	0.0924861	-2.76766
24551	Mdh1	malate dehydrogenase 1	-1.52264	-0.208371	-2.99792	0.0136351	0.0926105	-2.77011
25424	Ctse	cathepsin E	-1.70582	-0.0729194	-2.99758	0.013643	0.0926105	-2.77063
288167	Senp7	SUMO specific peptidase 7	-1.32199	-0.746274	-2.99685	0.0136598	0.0926797	-2.77174
499016	Tulp4	tubby like protein 4	-1.95072	0.203505	-2.99538	0.0136939	0.0927771	-2.774
59322	Cnksr2	connector enhancer of kinase suppressor of Ras 2	-1.45043	-0.726399	-2.99414	0.0137227	0.092822	-2.7759
290923	Aga	aspartylglucosaminidase	-1.39538	-0.127205	-2.99396	0.013727	0.092822	-2.77618
315639	Usp28	ubiquitin specific peptidase 28	-1.54917	-0.282866	-2.99428	0.0137195	0.092822	-2.77569
500066	Strip2	striatin interacting protein 2	-1.47645	0.148958	-2.99459	0.0137122	0.092822	-2.77521
305837	Ttc5	tetratricopeptide repeat domain 5	-1.55586	-0.311687	-2.99367	0.0137337	0.0928226	-2.77662
81503	Cxcl1	C-X-C motif chemokine ligand 1	-1.82986	-0.0291494	-2.99332	0.013742	0.0928341	-2.77717
171435	Aagab	alpha- and gamma-adaptin binding protein	-1.35017	0.493809	-2.99125	0.0137902	0.0931021	-2.78034
361798	Ehmt2	euchromatic histone lysine methyltransferase 2	-1.52388	-0.167245	-2.99105	0.0137949	0.0931021	-2.78065
25587	Id2	inhibitor of DNA binding 2	-1.48149	-0.49071	-2.98669	0.0138972	0.0934632	-2.78733
25705	Zeb1	zinc finger E-box binding homeobox 1	-1.81445	0.222115	-2.98804	0.0138654	0.0934632	-2.78526
83833	Smarcd2	SWI/SNF related, matrix associated, actin dependent regulator of chromatin, subfamily d, member 2	-1.47343	-0.347508	-2.98531	0.0139298	0.0934632	-2.78945
291259	Zmynd11	zinc finger, MYND-type containing 11	-1.43794	0.119315	-2.98551	0.0139249	0.0934632	-2.78914
303060	Pwwp2a	PWWP domain containing 2A	-1.51167	-0.710478	-2.98482	0.0139414	0.0934632	-2.79021
317468	Tlr7	toll-like receptor 7	-1.79138	0.0428824	-2.98425	0.0139548	0.0935085	-2.79108
100910319	LOC100910319	uncharacterized LOC100910319	-1.78976	-0.0664426	-2.98378	0.013966	0.0935388	-2.7918
311468	Tasp1	taspase 1	-1.41833	0.539871	-2.98315	0.0139809	0.0935495	-2.79277
309243	Vps13a	vacuolar protein sorting 13 homolog A	-1.64018	-0.363869	-2.98271	0.0139913	0.093575	-2.79344
292019	Sf3b3	splicing factor 3b, subunit 3	-1.35861	-0.498048	-2.97843	0.0140932	0.0938991	-2.80001
64347	Sncg	synuclein, gamma	-1.55422	-0.190636	-2.97567	0.0141593	0.094072	-2.80424
316216	Taf8	TATA-box binding protein associated factor 8	-1.59471	0.0846453	-2.97576	0.0141571	0.094072	-2.8041
367328	Washc1	WASH complex subunit 1	-1.37661	-0.614669	-2.97636	0.0141428	0.094072	-2.80318
25544	Sele	selectin E	-1.78187	-0.49521	-2.97339	0.0142143	0.0943928	-2.80775
288707	Gltp	glycolipid transfer protein	-1.59942	0.210735	-2.96777	0.0143503	0.0944302	-2.81636
296318	Ndrg3	NDRG family member 3	-1.80393	-0.0202521	-2.96737	0.01436	0.0944302	-2.81697
296883	Rpa3	replication protein A3	-1.65916	0.250207	-2.97223	0.0142422	0.0944302	-2.80952
300768	Coro2b	coronin 2B	-1.53293	-0.210369	-2.96858	0.0143306	0.0944302	-2.81512
306030	Med4	mediator complex subunit 4	-1.88079	-0.0276019	-2.96909	0.0143183	0.0944302	-2.81434
317381	Ccdc22	coiled-coil domain containing 22	-1.36588	-0.306335	-2.96708	0.0143672	0.0944302	-2.81743
361745	Smarca2	SWI/SNF related, matrix associated, actin dependent regulator of chromatin, subfamily a, member 2	-1.44272	-0.481532	-2.97232	0.0142399	0.0944302	-2.80938
498667	Fam155a	family with sequence similarity 155, member A	-1.73404	0.0860703	-2.97059	0.0142818	0.0944302	-2.81203
500252	H1fx	H1 histone family, member X	-1.70268	0.411195	-2.96897	0.014321	0.0944302	-2.81452
500288	Thumpd3	THUMP domain containing 3	-1.3975	-0.622334	-2.96706	0.0143676	0.0944302	-2.81745
679907	Pam16	presequence translocase associated motor 16	-1.30627	-0.650712	-2.96779	0.01435	0.0944302	-2.81634
690326	Lpal2	lipoprotein(a) like 2, pseudogene	-1.55106	-0.0697733	-2.96792	0.0143468	0.0944302	-2.81614
100909827	Kbtbd7	kelch repeat and BTB domain containing 7	-1.55696	-0.343572	-2.96942	0.0143103	0.0944302	-2.81383
100910973	LOC100910973	uncharacterized LOC100910973	-1.59404	0.179483	-2.9658	0.0143984	0.094548	-2.81939
296137	Bub1	BUB1 mitotic checkpoint serine/threonine kinase	-1.8602	-0.116823	-2.96358	0.0144528	0.0948457	-2.8228
315550	Rpusd4	RNA pseudouridine synthase D4	-1.56235	-0.3395	-2.96337	0.0144578	0.0948457	-2.82312
290232	Tinf2	TERF1 interacting nuclear factor 2	-1.41831	-0.28142	-2.96134	0.0145076	0.0951282	-2.82623
294322	Pknox1	PBX/knotted 1 homeobox 1	-1.33991	0.1134	-2.96071	0.0145233	0.0951863	-2.8272
65189	Stk3	serine/threonine kinase 3	-1.57319	-0.278124	-2.95953	0.0145523	0.0952878	-2.82901
312490	Paip2b	poly(A) binding protein interacting protein 2B	-1.56833	0.02622	-2.95916	0.0145614	0.0953028	-2.82957
294606	Fam172a	family with sequence similarity 172, member A	-1.73309	0.185856	-2.95668	0.014623	0.0955206	-2.83339
306695	Zfp367	zinc finger protein 367	-1.64098	0.418707	-2.9572	0.0146099	0.0955206	-2.83258
306991	Vps41	VPS41 HOPS complex subunit	-1.49552	0.29421	-2.95648	0.0146279	0.0955206	-2.8337
309389	Nkx2-3	NK2 homeobox 3	-1.74513	-0.0446807	-2.95622	0.0146344	0.0955206	-2.8341
316131	Fem1a	fem-1 homolog A	-1.57731	0.320036	-2.95618	0.0146354	0.0955206	-2.83416
100125361	Zfp867	zinc finger protein 867	-1.38676	-0.246256	-2.95654	0.0146263	0.0955206	-2.83359
291403	Zadh2	zinc binding alcohol dehydrogenase, domain containing 2	-1.37688	-0.568295	-2.9552	0.0146597	0.0956304	-2.83566
684314	Glyctk	glycerate kinase	-1.50379	-0.537898	-2.95495	0.0146658	0.0956304	-2.83604
102554883	LOC102554883	uncharacterized LOC102554883	-1.31115	0.578763	-2.9534	0.0147044	0.0958146	-2.83842
24811	Tap1	transporter 1, ATP binding cassette subfamily B member	-1.48326	0.314412	-2.952	0.0147394	0.0958218	-2.84056
64316	Srpx	sushi-repeat-containing protein, X-linked	-1.47002	0.287378	-2.95166	0.014748	0.0958218	-2.84109
85254	Slc44a1	solute carrier family 44 member 1	-1.56887	0.29735	-2.95159	0.0147497	0.0958218	-2.84119
259221	Osbpl1a	oxysterol binding protein-like 1A	-1.35907	0.431619	-2.95249	0.0147273	0.0958218	-2.83982
287097	Hcfc1r1	host cell factor C1 regulator 1	-1.53471	-0.346394	-2.95188	0.0147424	0.0958218	-2.84075
317580	Rab33a	RAB33A, member RAS oncogene family	-1.61059	-0.76821	-2.95264	0.0147236	0.0958218	-2.83959
502320	Faap24	FA core complex associated protein 24	-1.69539	0.183684	-2.95132	0.0147566	0.0958223	-2.84162
24583	Myh3	myosin heavy chain 3	-1.31111	1.10415	-2.95054	0.0147761	0.0958608	-2.84282
64672	Pln	phospholamban	-1.58715	0.237864	-2.95064	0.0147736	0.0958608	-2.84266
117520	Oxr1	oxidation resistance 1	-1.40832	-0.221839	-2.94438	0.0149312	0.096764	-2.85226
291137	Gmnn	geminin, DNA replication inhibitor	-1.63927	0.117974	-2.9442	0.014936	0.096764	-2.85255
25737	Pcna	proliferating cell nuclear antigen	-1.51827	0.341975	-2.94145	0.0150059	0.0970379	-2.85677
304322	Chst12	carbohydrate sulfotransferase 12	-1.49618	-0.0603245	-2.94104	0.0150164	0.0970612	-2.8574
317409	MGC109340	similar to Microsomal signal peptidase 23 kDa subunit (SPase 22 kDa subunit) (SPC22/23)	-1.39776	-0.647158	-2.94049	0.0150302	0.097106	-2.85824
361924	Mynn	myoneurin	-1.43571	-0.677913	-2.9396	0.0150531	0.0971646	-2.85961
310553	Tlr2	toll-like receptor 2	-1.69822	0.184624	-2.9383	0.0150864	0.0973347	-2.86161
25269	Pvalb	parvalbumin	-1.64758	0.245419	-2.93705	0.0151183	0.0973622	-2.86352
298074	Xpa	XPA, DNA damage recognition and repair factor	-1.29312	-0.739568	-2.93718	0.0151151	0.0973622	-2.86333
309387	Cnnm1	cyclin and CBS domain divalent metal cation transport mediator 1	-1.61206	0.0264161	-2.93662	0.0151293	0.0973667	-2.86418
170927	Clcc1	chloride channel CLIC-like 1	-1.50063	-0.542453	-2.93462	0.0151809	0.0974962	-2.86726
292090	Galnt2	polypeptide N-acetylgalactosaminyltransferase 2	-1.74313	0.369791	-2.93436	0.0151876	0.0974962	-2.86766
297389	Dguok	deoxyguanosine kinase	-1.34197	-0.207688	-2.93375	0.0152032	0.0975514	-2.86858
362045	Lamtor3	late endosomal/lysosomal adaptor, MAPK and MTOR activator 3	-1.62324	-0.311773	-2.933	0.0152227	0.097632	-2.86974
303470	Kat7	lysine acetyltransferase 7	-1.69086	0.348381	-2.93222	0.0152429	0.0976723	-2.87094
366980	Arid2	AT-rich interaction domain 2	-1.54928	-0.110464	-2.93248	0.015236	0.0976723	-2.87053
361767	Poll	DNA polymerase lambda	-1.33821	-0.522716	-2.93129	0.015267	0.0977826	-2.87237
363924	Rad9b	RAD9 checkpoint clamp component B	-1.42419	-0.732435	-2.93101	0.0152741	0.0977835	-2.87279
298032	Inip	INTS3 and NABP interacting protein	-1.75278	-0.0157732	-2.93011	0.0152974	0.0978883	-2.87417
311848	Sh3glb2	SH3 domain-containing GRB2-like endophilin B2	-1.63728	-0.0610777	-2.92953	0.0153126	0.0979405	-2.87507
306589	Klhdc8b	kelch domain containing 8B	-1.48342	-0.533235	-2.92759	0.0153631	0.098053	-2.87805
499076	Ppp1r12c	protein phosphatase 1, regulatory subunit 12C	-1.52889	0.579617	-2.92752	0.015365	0.098053	-2.87816
24309	Dbp	D-box binding PAR bZIP transcription factor	-1.50389	-0.638355	-2.92537	0.0154211	0.0981437	-2.88145
25686	Gnai1	G protein subunit alpha i1	-1.35039	-0.0391614	-2.92555	0.0154163	0.0981437	-2.88117
140928	Pde11a	phosphodiesterase 11A	-1.6926	0.16752	-2.92578	0.0154103	0.0981437	-2.88082
316088	Klhl40	kelch-like family member 40	-1.6037	0.11773	-2.92573	0.0154117	0.0981437	-2.8809
361178	Tfdp1	transcription factor Dp-1	-1.3805	-0.166774	-2.92391	0.0154593	0.0983426	-2.88369
171083	Itfg1	integrin alpha FG-GAP repeat containing 1	-1.43484	0.622574	-2.92361	0.0154674	0.0983492	-2.88416
313961	Smc6	structural maintenance of chromosomes 6	-1.74814	-0.217754	-2.92186	0.0155134	0.098553	-2.88685
360634	Plekhh3	pleckstrin homology, MyTH4 and FERM domain containing H3	-1.44822	0.563666	-2.92131	0.0155277	0.0985548	-2.88768
687696	Stambpl1	STAM binding protein-like 1	-1.3753	0.408275	-2.92139	0.0155258	0.0985548	-2.88757
24837	Tnnt2	troponin T2, cardiac type	-1.44364	0.195498	-2.92101	0.0155358	0.0985615	-2.88815
192126	Dab2ip	DAB2 interacting protein	-1.64603	-0.220938	-2.92004	0.0155614	0.0986352	-2.88964
314374	Foxn3	forkhead box N3	-1.55985	-0.89765	-2.92015	0.0155586	0.0986352	-2.88948
303190	Atpaf2	ATP synthase mitochondrial F1 complex assembly factor 2	-1.45122	-0.239245	-2.91786	0.0156191	0.098867	-2.89299
100363376	Cmc2	C-x(9)-C motif containing 2	-1.67772	-0.0658627	-2.91802	0.0156149	0.098867	-2.89274
54355	Rassf5	Ras association domain family member 5	-1.39372	-0.317983	-2.91721	0.0156363	0.098887	-2.89398
315804	Rfx7	regulatory factor X, 7	-1.25618	0.643598	-2.9166	0.0156525	0.0989448	-2.89492
81755	Rab3b	RAB3B, member RAS oncogene family	-1.85377	0.167311	-2.91566	0.0156776	0.0990148	-2.89637
24494	Il1b	interleukin 1 beta	-1.33836	-0.073618	-2.91449	0.0157088	0.0991628	-2.89817
25359	Tmpo	thymopoietin	-1.31504	0.746594	-2.91266	0.0157577	0.0992197	-2.90097
288702	Unc119b	unc-119 lipid binding chaperone B	-1.54777	-0.0189363	-2.91233	0.0157665	0.0992197	-2.90148
685174	Cnpy3	canopy FGF signaling regulator 3	-1.48289	-0.336597	-2.91298	0.0157492	0.0992197	-2.90049
689248	Ecscr	endothelial cell surface expressed chemotaxis and apoptosis regulator	-1.36706	-0.263272	-2.9124	0.0157646	0.0992197	-2.90137
100360342	Msh6	mutS homolog 6	-1.6964	0.0812808	-2.91338	0.0157384	0.0992197	-2.89987
361569	Prr12	proline rich 12	-1.45293	-0.50209	-2.91171	0.0157831	0.0992795	-2.90243
24240	Cad	carbamoyl-phosphate synthetase 2, aspartate transcarbamylase, and dihydroorotase	-1.48146	0.570383	-2.90987	0.0158326	0.0995019	-2.90526
302890	Cpped1	calcineurin-like phosphoesterase domain containing 1	-1.40164	-0.326434	-2.90953	0.0158418	0.0995152	-2.90579
290880	Adprhl1	ADP-ribosylhydrolase like 1	-1.3171	0.110003	-2.90685	0.0159139	0.0998344	-2.90989
298782	Ttc27	tetratricopeptide repeat domain 27	-1.52131	0.341886	-2.90359	0.0160024	0.100301	-2.91491
84590	Rab27b	RAB27B, member RAS oncogene family	-1.44634	0.160471	-2.90247	0.0160329	0.10037	-2.91663
314910	Nab2	Ngfi-A binding protein 2	-1.34803	-0.168443	-2.90268	0.0160273	0.10037	-2.91631
102553722	LOC102553722	uncharacterized LOC102553722	-1.98529	-0.0255214	-2.90239	0.0160349	0.10037	-2.91674
313977	Lpin1	lipin 1	-1.28862	0.868841	-2.90184	0.01605	0.10042	-2.91759
297607	RGD1311164	similar to DNA segment, Chr 6, Wayne State University 163, expressed	-1.54534	-0.0234196	-2.90013	0.0160968	0.100611	-2.92022
360826	Hscb	HscB mitochondrial iron-sulfur cluster co-chaperone	-1.48046	-0.531011	-2.89994	0.016102	0.100611	-2.92052
362774	Serpina11	serpin family A member 11	-1.41687	-0.178156	-2.89869	0.0161363	0.10078	-2.92244
306571	Kat6a	lysine acetyltransferase 6A	-1.48041	0.420079	-2.89707	0.0161807	0.100923	-2.92492
293493	Fam57b	family with sequence similarity 57, member B	-1.4496	1.09734	-2.89435	0.0162556	0.101263	-2.9291
683514	Ppp1r42	protein phosphatase 1, regulatory subunit 42	-1.85179	-0.222217	-2.89271	0.016301	0.101449	-2.93162
300359	Ccdc82	coiled-coil domain containing 82	-1.30475	0.262603	-2.89194	0.0163222	0.101536	-2.93279
295455	Slc39a8	solute carrier family 39 member 8	-1.26842	-0.0457549	-2.89146	0.0163356	0.101574	-2.93353
305101	RGD1304622	similar to 6820428L09 protein	-1.56559	-0.0465812	-2.8902	0.0163708	0.101606	-2.93548
684681	Hist1h1c	histone cluster 1 H1 family member c	-1.9098	0.00817282	-2.89083	0.0163533	0.101606	-2.93451
300173	Gxylt1	glucoside xylosyltransferase 1	-1.47379	0.896356	-2.88845	0.0164195	0.101825	-2.93816
310378	Nnt	nicotinamide nucleotide transhydrogenase	-1.47507	-0.555938	-2.88773	0.0164395	0.101904	-2.93926
171053	Pank4	pantothenate kinase 4	-1.41236	0.435355	-2.88692	0.0164621	0.101966	-2.9405
64026	Casp7	caspase 7	-1.45824	0.341511	-2.88633	0.0164788	0.102013	-2.94142
81821	Dgkz	diacylglycerol kinase zeta	-1.58669	-0.439281	-2.88592	0.0164901	0.102039	-2.94204
58935	Gas6	growth arrest specific 6	-1.46774	0.674263	-2.88459	0.0165275	0.102225	-2.94408
117016	Mark1	microtubule affinity regulating kinase 1	-1.59488	-0.548845	-2.8823	0.0165921	0.102453	-2.94761
691678	Tmem121	transmembrane protein 121	-1.50154	-0.395825	-2.88221	0.0165946	0.102453	-2.94775
308406	Six5	SIX homeobox 5	-1.38598	-0.0116766	-2.88006	0.0166552	0.102654	-2.95104
315606	Kmt2a	lysine methyltransferase 2A	-1.81133	0.174561	-2.87914	0.0166814	0.102725	-2.95246
246324	Rab31	RAB31, member RAS oncogene family	-1.38533	-0.493783	-2.87816	0.0167092	0.102851	-2.95396
171092	G3bp1	G3BP stress granule assembly factor 1	-1.44257	0.428083	-2.8778	0.0167194	0.102869	-2.95452
289080	Rgl1	ral guanine nucleotide dissociation stimulator,-like 1	-1.76992	0.0141818	-2.87509	0.0167967	0.103167	-2.95868
307210	Timm21	translocase of inner mitochondrial membrane 21	-1.39289	-0.414093	-2.87373	0.0168354	0.103357	-2.96077
360622	Igfbp4	insulin-like growth factor binding protein 4	-1.30603	-0.191693	-2.87259	0.0168683	0.103488	-2.96253
364380	Abhd4	abhydrolase domain containing 4	-1.4075	0.256388	-2.8718	0.0168909	0.103517	-2.96374
366376	Frrs1l	ferric-chelate reductase 1-like	-1.3416	0.463177	-2.87199	0.0168853	0.103517	-2.96344
29362	Tef	TEF, PAR bZIP transcription factor	-1.68967	-0.361963	-2.87082	0.0169192	0.103537	-2.96525
64119	Kcnk12	potassium two pore domain channel subfamily K member 12	-1.37351	0.518205	-2.8708	0.0169196	0.103537	-2.96527
313323	Psip1	PC4 and SFRS1 interacting protein 1	-1.83381	-0.186854	-2.87066	0.0169237	0.103537	-2.96549
498576	Il17rd	interleukin 17 receptor D	-1.24404	-0.469384	-2.8701	0.0169399	0.103572	-2.96635
64015	Khdrbs3	KH RNA binding domain containing, signal transduction associated 3	-1.24915	-0.613179	-2.86898	0.016972	0.103663	-2.96806
83632	Deaf1	DEAF1 transcription factor	-1.57771	-0.0701578	-2.86842	0.0169883	0.103674	-2.96893
685425	Odf2l	outer dense fiber of sperm tails 2-like	-1.43925	-0.705797	-2.86835	0.0169904	0.103674	-2.96904
499749	Tprn	taperin	-1.69738	0.0530859	-2.86729	0.0170208	0.103815	-2.97066
192172	Mpst	mercaptopyruvate sulfurtransferase	-1.30839	-0.524131	-2.86589	0.0170614	0.103882	-2.97281
287739	Eftud2	elongation factor Tu GTP binding domain containing 2	-1.32038	0.621862	-2.86628	0.0170501	0.103882	-2.97221
309256	Fan1	FANCD2 and FANCI associated nuclease 1	-1.45851	-0.669421	-2.86518	0.0170821	0.103915	-2.97391
364069	Hlx	H2.0-like homeobox	-1.39005	-0.438807	-2.8645	0.0171018	0.103919	-2.97495
308341	Ssc5d	scavenger receptor cysteine rich family member with 5 domains	-1.42344	0.550518	-2.86219	0.0171692	0.104178	-2.9785
363544	Cluap1	clusterin associated protein 1	-1.36253	-0.477622	-2.86162	0.0171858	0.104234	-2.97938
286979	Zfp455	zinc finger protein 455	-1.36737	-0.548124	-2.8606	0.0172156	0.104325	-2.98094
315746	Cln6	CLN6, transmembrane ER protein	-1.2796	-0.385865	-2.8607	0.0172126	0.104325	-2.98078
117519	Keap1	Kelch-like ECH-associated protein 1	-1.38308	0.0871493	-2.86	0.0172331	0.104341	-2.98186
691777	Lrrc75a	leucine rich repeat containing 75A	-1.85221	0.0562809	-2.85791	0.0172947	0.104579	-2.98508
312800	Atf7ip	activating transcription factor 7 interacting protein	-1.47561	-0.700412	-2.85638	0.0173397	0.104788	-2.98743
363115	Slc9a9	solute carrier family 9 member A9	-1.33171	-0.502664	-2.85622	0.0173442	0.104788	-2.98766
50566	Grem1	gremlin 1, DAN family BMP antagonist	-1.24759	1.04299	-2.85529	0.0173717	0.104909	-2.98909
63912	Fam129a	family with sequence similarity 129, member A	-1.68238	0.0843387	-2.85475	0.0173877	0.104915	-2.98992
300678	Cd3g	CD3g molecule	-1.24211	0.496393	-2.85485	0.0173847	0.104915	-2.98977
303774	Tnrc6c	trinucleotide repeat containing 6C	-1.43859	0.110386	-2.85447	0.017396	0.104921	-2.99036
25423	Ctsc	cathepsin C	-1.42864	0.0797192	-2.85386	0.0174141	0.104933	-2.9913
287836	Fbf1	Fas binding factor 1	-1.46542	-0.515074	-2.85344	0.0174267	0.104933	-2.99195
363067	Sin3a	SIN3 transcription regulator family member A	-1.50487	0.425483	-2.85339	0.0174279	0.104933	-2.99201
363167	Ulk4	unc-51 like kinase 4	-1.636	0.127066	-2.85367	0.0174197	0.104933	-2.99159
25709	Hmbs	hydroxymethylbilane synthase	-1.37112	-0.0516025	-2.85252	0.0174539	0.105045	-2.99336
83534	Tpp1	tripeptidyl peptidase 1	-1.54457	-0.455469	-2.85162	0.0174806	0.10516	-2.99474
362595	Oscp1	organic solute carrier partner 1	-1.48363	-0.42493	-2.85092	0.0175013	0.10524	-2.99581
304817	Ipo9	importin 9	-1.47976	0.311754	-2.84794	0.0175903	0.105507	-3.00039
314075	Pnpla8	patatin-like phospholipase domain containing 8	-1.60864	-0.102931	-2.84793	0.0175907	0.105507	-3.00041
317464	Msl3	MSL complex subunit 3	-1.33255	0.237092	-2.84831	0.0175794	0.105507	-2.99983
687295	Timm50	translocase of inner mitochondrial membrane 50	-1.35411	-0.223877	-2.84868	0.0175684	0.105507	-2.99926
79223	Gk	glycerol kinase	-1.49941	0.038371	-2.84708	0.0176162	0.105615	-3.00172
282634	Pxmp4	peroxisomal membrane protein 4	-1.4769	0.681528	-2.84623	0.0176417	0.105632	-3.00302
58964	Nme6	NME/NM23 nucleoside diphosphate kinase 6	-1.81466	-0.0294764	-2.84524	0.0176713	0.105765	-3.00454
246246	Pnpla7	patatin-like phospholipase domain containing 7	-1.38532	-0.223823	-2.84413	0.0177048	0.10592	-3.00625
50560	Ip6k1	inositol hexakisphosphate kinase 1	-1.34649	-0.375349	-2.84302	0.0177381	0.105939	-3.00794
362269	Pcif1	PDX1 C-terminal inhibiting factor 1	-1.42368	-0.409501	-2.84365	0.0177191	0.105939	-3.00698
309812	Rev3l	REV3 like, DNA directed polymerase zeta catalytic subunit	-1.53178	-0.605804	-2.84138	0.0177879	0.106157	-3.01047
691610	Zfp770	zinc finger protein 770	-1.64372	-0.318209	-2.84084	0.017804	0.106157	-3.01129
155696	Dcbld2	discoidin, CUB and LCCL domain containing 2	-1.48597	0.511115	-2.8405	0.0178144	0.106169	-3.01182
266733	Slc12a8	solute carrier family 12, member 8	-1.32302	-0.250457	-2.83854	0.0178738	0.106433	-3.01483
192262	C1s	complement C1s	-1.31802	-0.47298	-2.83789	0.0178936	0.106506	-3.01582
102554727	LOC102554727	uncharacterized LOC102554727	-1.70076	-0.18111	-2.8369	0.017924	0.106642	-3.01736
58844	Grb14	growth factor receptor bound protein 14	-1.39748	-0.379253	-2.83546	0.0179679	0.106738	-3.01957
81536	Sgpp1	sphingosine-1-phosphate phosphatase 1	-1.25714	-0.109194	-2.83512	0.0179782	0.106738	-3.02008
360775	Zfp157	zinc finger protein 157	-1.31218	-0.654134	-2.83566	0.0179617	0.106738	-3.01925
691042	Sbf2	SET binding factor 2	-1.6705	0.177626	-2.83394	0.0180144	0.106908	-3.0219
305509	Adcy1	adenylate cyclase 1	-1.63492	0.150421	-2.83245	0.0180601	0.107043	-3.02418
295279	Fcgr1a	Fc fragment of IgG receptor Ia	-1.39441	0.268364	-2.83186	0.0180784	0.107062	-3.0251
688272	Rnf157	ring finger protein 157	-1.69018	0.368718	-2.83152	0.0180887	0.107078	-3.02561
300786	Clpx	caseinolytic mitochondrial matrix peptidase chaperone subunit	-1.59773	-0.248214	-2.83082	0.0181103	0.107116	-3.02669
308060	Ccdc127	coiled-coil domain containing 127	-1.51555	0.24677	-2.82827	0.0181889	0.10731	-3.0306
315023	Slc25a32	solute carrier family 25 member 32	-1.79832	0.0524094	-2.82837	0.018186	0.10731	-3.03046
363024	Slc44a2	solute carrier family 44 member 2	-1.35964	0.194314	-2.82922	0.0181597	0.10731	-3.02915
690422	Tedc1	tubulin epsilon and delta complex 1	-1.5228	0.334966	-2.82942	0.0181535	0.10731	-3.02884
291076	Eci3	enoyl-Coenzyme A delta isomerase 3	-1.6314	-0.747074	-2.82612	0.0182558	0.107486	-3.03392
311598	Fam83d	family with sequence similarity 83, member D	-1.81585	0.216008	-2.82641	0.0182466	0.107486	-3.03346
102546572	LOC102546572	zinc finger protein 709-like	-1.45257	-0.388778	-2.82608	0.0182569	0.107486	-3.03397
308820	Ccdc90b	coiled-coil domain containing 90B	-1.24877	-0.298638	-2.82517	0.0182852	0.107607	-3.03537
363110	Rwdd2a	RWD domain containing 2A	-1.33619	-0.862199	-2.82399	0.018322	0.107733	-3.03718
685072	Rarg	retinoic acid receptor, gamma	-1.40526	0.770124	-2.8234	0.0183405	0.107738	-3.03809
306011	Piwil2	piwi-like RNA-mediated gene silencing 2	-1.74521	0.519529	-2.82245	0.01837	0.107791	-3.03955
299810	Yeats4	YEATS domain containing 4	-1.54497	-0.0870555	-2.81902	0.0184778	0.108378	-3.04483
64441	Hsf2	heat shock transcription factor 2	-1.6202	-0.719077	-2.81816	0.0185047	0.108399	-3.04614
287827	Armc7	armadillo repeat containing 7	-1.27129	-0.368034	-2.81781	0.0185157	0.108399	-3.04668
361736	Patl1	PAT1 homolog 1, processing body mRNA decay factor	-1.42531	0.586076	-2.81784	0.0185147	0.108399	-3.04663
363059	Zw10	zw10 kinetochore protein	-1.47545	0.346117	-2.8179	0.0185129	0.108399	-3.04654
83803	Prkab1	protein kinase AMP-activated non-catalytic subunit beta 1	-1.27598	0.630778	-2.81518	0.0185989	0.108635	-3.05072
316775	Ankrd12	ankyrin repeat domain 12	-1.30938	0.228251	-2.81536	0.018593	0.108635	-3.05044
299730	Nedd1	neural precursor cell expressed, developmentally down-regulated 1	-1.29998	0.307507	-2.81429	0.0186271	0.108754	-3.05209
116685	Lmnb1	lamin B1	-1.67034	0.616571	-2.81389	0.0186396	0.108783	-3.0527
307806	Thap11	THAP domain containing 11	-1.71477	-0.179062	-2.81311	0.0186646	0.108883	-3.0539
81660	Gatm	glycine amidinotransferase	-1.62401	0.672545	-2.81216	0.0186948	0.108972	-3.05536
100360936	Anapc16	anaphase promoting complex subunit 16	-1.36266	0.976089	-2.81214	0.0186953	0.108972	-3.05539
116693	Cyth3	cytohesin 3	-1.46633	0.397398	-2.81138	0.0187193	0.108976	-3.05655
360822	Sppl3	signal peptide peptidase like 3	-1.78414	-0.032542	-2.81144	0.0187174	0.108976	-3.05646
114125	Dll3	delta like canonical Notch ligand 3	-1.53623	-0.0892159	-2.80949	0.0187797	0.109047	-3.05945
303259	Mink1	misshapen-like kinase 1	-1.66007	-0.162179	-2.80963	0.0187753	0.109047	-3.05924
304488	Pptc7	PTC7 protein phosphatase homolog	-1.63845	-0.00260419	-2.8093	0.0187857	0.109047	-3.05974
308864	Fchsd2	FCH and double SH3 domains 2	-1.40631	-0.300294	-2.80955	0.0187777	0.109047	-3.05936
309855	Fig4	FIG4 phosphoinositide 5-phosphatase	-1.46032	0.095652	-2.80995	0.0187649	0.109047	-3.05874
361730	Tkfc	triokinase and FMN cyclase	-1.43044	-0.584826	-2.80932	0.0187852	0.109047	-3.05972
293410	Swap70	switching B-cell complex subunit SWAP70	-1.36625	0.382318	-2.80901	0.0187951	0.109056	-3.06019
299982	Ankrd46	ankyrin repeat domain 46	-1.26734	-0.27466	-2.80583	0.018897	0.109537	-3.06507
303638	Abca8a	ATP-binding cassette, subfamily A (ABC1), member 8a	-1.39113	0.10908	-2.80436	0.0189444	0.109606	-3.06733
312166	Cadps2	calcium dependent secretion activator 2	-1.96584	-0.30096	-2.80344	0.0189743	0.109644	-3.06876
316477	Smarcal1	Swi/SNF related matrix associated, actin dependent regulator of chromatin, subfamily a-like 1	-1.41226	-0.247273	-2.80356	0.0189703	0.109644	-3.06857
501688	Lsm11	LSM11, U7 small nuclear RNA associated	-1.64908	0.40904	-2.80384	0.0189613	0.109644	-3.06814
81641	Anpep	alanyl aminopeptidase, membrane	-1.28646	-0.179509	-2.80236	0.0190092	0.109666	-3.07041
287452	RGD1308134	similar to RIKEN cDNA 1110020A23	-1.35693	-0.569193	-2.80242	0.019007	0.109666	-3.07031
290553	Mustn1	musculoskeletal, embryonic nuclear protein 1	-1.69447	0.806388	-2.80249	0.0190049	0.109666	-3.07021
689623	Psmg4	proteasome assembly chaperone 4	-1.28486	-0.162142	-2.80293	0.0189908	0.109666	-3.06954
361705	Cnih2	cornichon family AMPA receptor auxiliary protein 2	-1.36798	-0.574973	-2.79957	0.0190995	0.109962	-3.07469
498675	LOC498675	hypothetical LOC498675	-1.59483	0.0365174	-2.79956	0.0190998	0.109962	-3.0747
500573	Tmco4	transmembrane and coiled-coil domains 4	-1.37739	0.0582369	-2.80004	0.0190844	0.109962	-3.07397
100361506	Armc3	armadillo repeat containing 3	-2.03117	0.289743	-2.79864	0.0191299	0.110046	-3.07613
308516	Rhpn2	rhophilin, Rho GTPase binding protein 2	-1.38581	-0.260427	-2.79763	0.0191629	0.110145	-3.07768
361732	Tmem109	transmembrane protein 109	-1.54551	0.0109466	-2.79718	0.0191776	0.110185	-3.07837
170573	Slc38a4	solute carrier family 38, member 4	-1.28411	-0.0938935	-2.79629	0.0192066	0.110249	-3.07973
311327	Knl1	kinetochore scaffold 1	-1.69437	-0.0909884	-2.79649	0.0192001	0.110249	-3.07943
102551140	LOC102551140	REST corepressor 3-like	-1.45713	0.273761	-2.79602	0.0192154	0.110249	-3.08015
362612	Srsf4	serine and arginine rich splicing factor 4	-1.39054	0.433776	-2.79376	0.0192894	0.110466	-3.08362
309638	Taf11	TATA-box binding protein associated factor 11	-1.29132	-0.237739	-2.79349	0.0192983	0.110472	-3.08403
25046	Pigr	polymeric immunoglobulin receptor	-1.63971	0.547437	-2.79221	0.0193404	0.110533	-3.086
360568	Mettl16	methyltransferase like 16	-1.20768	-0.281911	-2.7929	0.0193176	0.110533	-3.08493
499204	Ddias	DNA damage-induced apoptosis suppressor	-1.72529	0.314273	-2.79243	0.0193333	0.110533	-3.08566
307774	Otud4	OTU deubiquitinase 4	-1.41335	0.625066	-2.79045	0.0193985	0.110818	-3.0887
311446	Hao1	hydroxyacid oxidase 1	-1.58763	0.479415	-2.78944	0.0194319	0.110909	-3.09025
498514	RGD1565222	similar to RIKEN cDNA 4931414P19	-1.32195	-0.792623	-2.78746	0.0194974	0.111103	-3.09329
360520	Tbc1d9b	TBC1 domain family member 9B	-1.36258	-0.391235	-2.78675	0.0195209	0.111159	-3.09438
100362836	Poc1b	POC1 centriolar protein B	-1.74672	-0.0131156	-2.78605	0.0195444	0.111238	-3.09546
64012	Rad50	RAD50 double strand break repair protein	-1.56527	-0.0266059	-2.78372	0.0196221	0.111509	-3.09904
81742	Pde1c	phosphodiesterase 1C	-1.53686	-0.356072	-2.7824	0.0196661	0.111624	-3.10106
360947	Pacrgl	parkin coregulated like	-1.36547	-0.749366	-2.78133	0.019702	0.111728	-3.10271
362634	C1qc	complement C1q C chain	-1.45136	-0.251935	-2.78114	0.0197083	0.111728	-3.10299
100912012	Clec3b	C-type lectin domain family 3, member B	-1.60429	0.466088	-2.78137	0.0197009	0.111728	-3.10265
85239	Mlycd	malonyl-CoA decarboxylase	-1.57226	0.38124	-2.78047	0.0197309	0.111766	-3.10403
294018	Taf5	TATA-box binding protein associated factor 5	-1.61447	0.342627	-2.78051	0.0197296	0.111766	-3.10397
316129	Uhrf1	ubiquitin-like with PHD and ring finger domains 1	-1.55215	-0.147137	-2.77989	0.0197504	0.111786	-3.10492
494338	Trim25	tripartite motif-containing 25	-1.41911	0.730671	-2.77869	0.0197909	0.111971	-3.10677
108351531	LOC108351531	U1 small nuclear ribonucleoprotein C pseudogene	-1.65556	0.296207	-2.77752	0.0198304	0.112104	-3.10857
311129	Osbpl6	oxysterol binding protein-like 6	-1.39377	-0.075608	-2.77707	0.0198454	0.112115	-3.10925
362860	Appl2	adaptor protein, phosphotyrosine interacting with PH domain and leucine zipper 2	-1.37378	-0.149261	-2.77646	0.0198662	0.112115	-3.11019
367304	Ap1s3	adaptor related protein complex 1 sigma 3 subunit	-1.45677	0.53216	-2.7766	0.0198612	0.112115	-3.10997
499017	Sytl3	synaptotagmin-like 3	-1.54379	0.0730277	-2.77692	0.0198507	0.112115	-3.10949
305055	Kctd3	potassium channel tetramerization domain containing 3	-1.34924	-0.159481	-2.77445	0.0199343	0.11242	-3.11328
64822	Fabp9	fatty acid binding protein 9	-1.65887	-0.193194	-2.77396	0.0199507	0.112467	-3.11402
497978	Dgke	diacylglycerol kinase epsilon	-1.8283	0.199609	-2.77373	0.0199586	0.112467	-3.11438
364681	Rnf144b	ring finger protein 144B	-1.25144	-0.43647	-2.77339	0.0199702	0.112487	-3.1149
361605	Pcf11	PCF11 cleavage and polyadenylation factor subunit	-1.44401	0.353034	-2.7718	0.0200245	0.112748	-3.11735
25392	Atp5if1	ATP synthase inhibitory factor subunit 1	-1.29924	-0.90587	-2.77045	0.0200705	0.112917	-3.11942
294783	Wdr70	WD repeat domain 70	-1.77709	-0.157377	-2.77007	0.0200837	0.112945	-3.12001
298065	Tex10	testis expressed 10	-1.46578	0.0729969	-2.76929	0.0201103	0.112974	-3.1212
497930	Sco1	SCO1 cytochrome c oxidase assembly protein	-1.67101	0.675686	-2.76921	0.0201128	0.112974	-3.12131
361126	Sugp2	SURP and G patch domain containing 2	-1.54883	-0.287821	-2.76774	0.0201634	0.113168	-3.12358
289324	Cnih4	cornichon family AMPA receptor auxiliary protein 4	-1.23801	-0.737775	-2.76716	0.0201834	0.113235	-3.12447
498701	RGD1566359	similar to RIKEN cDNA B230219D22	-1.70353	0.261385	-2.76622	0.0202156	0.11337	-3.12591
89842	Mbtps1	membrane-bound transcription factor peptidase, site 1	-1.69642	0.407555	-2.76537	0.020245	0.11349	-3.12722
81513	Lig1	DNA ligase 1	-1.26137	0.453258	-2.76472	0.0202673	0.113503	-3.12822
117582	Tmem158	transmembrane protein 158	-1.6133	0.225471	-2.76392	0.0202949	0.113503	-3.12944
192649	Prokr2	prokineticin receptor 2	-1.41695	-0.0402152	-2.7639	0.0202958	0.113503	-3.12948
361111	Smim4	small integral membrane protein 4	-1.50412	0.146146	-2.76401	0.0202919	0.113503	-3.12931
363113	Syncrip	synaptotagmin binding, cytoplasmic RNA interacting protein	-1.43847	-0.82315	-2.76289	0.0203306	0.113633	-3.13103
499285	Adam8	ADAM metallopeptidase domain 8	-1.74509	0.0414563	-2.76276	0.0203352	0.113633	-3.13123
29173	Csn2	casein beta	-1.89691	0.249947	-2.76213	0.0203568	0.113695	-3.13219
362046	Dapp1	dual adaptor of phosphotyrosine and 3-phosphoinositides 1	-1.31213	-0.500432	-2.76197	0.0203624	0.113695	-3.13243
124461	Pacsin2	protein kinase C and casein kinase substrate in neurons 2	-1.36415	0.0982093	-2.75946	0.0204496	0.113929	-3.13629
307428	Tnfaip8	TNF alpha induced protein 8	-1.65276	0.0296266	-2.75962	0.0204442	0.113929	-3.13605
307524	Wdr33	WD repeat domain 33	-1.28682	0.701567	-2.75937	0.0204529	0.113929	-3.13643
311591	Rprd1b	regulation of nuclear pre-mRNA domain containing 1B	-1.35352	-0.165596	-2.7589	0.0204691	0.113974	-3.13715
24205	Apc	APC, WNT signaling pathway regulator	-1.46956	0.482046	-2.75654	0.0205518	0.114142	-3.14078
84494	Trpc4	transient receptor potential cation channel, subfamily C, member 4	-1.3577	-0.861449	-2.75618	0.0205643	0.114142	-3.14133
313341	Pigo	phosphatidylinositol glycan anchor biosynthesis, class O	-1.31351	-0.679909	-2.75686	0.0205404	0.114142	-3.14028
314453	Wdr20	WD repeat domain 20	-1.5708	0.498784	-2.75658	0.0205502	0.114142	-3.14071
499506	Ankrd34b	ankyrin repeat domain 34B	-1.41887	-0.0107102	-2.75695	0.0205372	0.114142	-3.14014
686590	Iqsec1	IQ motif and Sec7 domain 1	-1.40878	0.534484	-2.75636	0.0205579	0.114142	-3.14105
84014	Ralbp1	ralA binding protein 1	-1.50281	0.352545	-2.75524	0.0205972	0.114211	-3.14277
308023	Ssx2ip	SSX family member 2 interacting protein	-1.2439	0.0654944	-2.75513	0.020601	0.114211	-3.14294
100362548	Elp3	elongator acetyltransferase complex subunit 3	-1.43926	-0.423316	-2.75534	0.0205938	0.114211	-3.14262
79244	Hsd17b4	hydroxysteroid (17-beta) dehydrogenase 4	-1.60122	-0.112148	-2.75458	0.0206204	0.114229	-3.14379
312301	Zfp956	zinc finger protein 956	-1.39403	-0.504893	-2.75468	0.020617	0.114229	-3.14363
303754	Rab40b	Rab40b, member RAS oncogene family	-1.33355	-0.128782	-2.75393	0.0206433	0.114265	-3.14479
499821	Fam171b	family with sequence similarity 171, member B	-1.31474	-0.681561	-2.75405	0.0206388	0.114265	-3.14459
78956	Scn9a	sodium voltage-gated channel alpha subunit 9	-1.71426	-0.426022	-2.75051	0.0207637	0.114641	-3.15003
313978	E2f6	E2F transcription factor 6	-1.39906	0.453181	-2.74995	0.0207838	0.114641	-3.1509
315119	Mfng	MFNG O-fucosylpeptide 3-beta-N-acetylglucosaminyltransferase	-1.84558	-0.386764	-2.74995	0.0207836	0.114641	-3.15089
361757	Opalin	oligodendrocytic myelin paranodal and inner loop protein	-1.53022	0.32285	-2.75004	0.0207805	0.114641	-3.15076
362829	Lsm7	LSM7 homolog, U6 small nuclear RNA and mRNA degradation associated	-1.38086	0.194215	-2.75078	0.0207541	0.114641	-3.14961
315203	Gramd4	GRAM domain containing 4	-1.37066	-0.446715	-2.74949	0.0207999	0.114681	-3.1516
288051	Umps	uridine monophosphate synthetase	-1.54212	0.31845	-2.74893	0.0208196	0.114745	-3.15245
25216	Sdc1	syndecan 1	-1.34834	-0.315693	-2.74768	0.0208643	0.114811	-3.15438
64392	Aldh1l1	aldehyde dehydrogenase 1 family, member L1	-1.41198	-0.152809	-2.74552	0.0209412	0.11483	-3.1577
64553	Akap6	A-kinase anchoring protein 6	-1.30335	0.820361	-2.74719	0.0208816	0.11483	-3.15513
291553	Nedd4l	neural precursor cell expressed, developmentally down-regulated 4-like, E3 ubiquitin protein ligase	-1.37564	-0.404147	-2.74594	0.0209261	0.11483	-3.15705
306647	Champ1	chromosome alignment maintaining phosphoprotein 1	-1.61872	0.327359	-2.74617	0.0209179	0.11483	-3.1567
360821	Gatc	glutamyl-tRNA amidotransferase subunit C	-1.51504	-0.266509	-2.74711	0.0208846	0.11483	-3.15526
361700	Kdm2a	lysine demethylase 2A	-1.43876	-0.25855	-2.74688	0.0208928	0.11483	-3.15561
679203	Nelfcd	negative elongation factor complex member C/D	-1.57076	-0.430839	-2.74641	0.0209095	0.11483	-3.15633
304759	Rab3gap1	RAB3 GTPase activating protein catalytic subunit 1	-1.3722	0.0444511	-2.74456	0.0209754	0.114905	-3.15917
307081	Pitrm1	pitrilysin metallopeptidase 1	-1.70786	0.404903	-2.74445	0.0209794	0.114905	-3.15934
29476	Glg1	golgi glycoprotein 1	-1.45531	0.436824	-2.74419	0.0209886	0.11491	-3.15974
317407	Bhlhb9	basic helix-loop-helix family member B9	-1.5465	0.227682	-2.74387	0.0209999	0.114927	-3.16022
316640	Atg4b	autophagy related 4B, cysteine peptidase	-1.49688	-0.35061	-2.743	0.0210313	0.115014	-3.16157
688466	Usp21	ubiquitin specific peptidase 21	-1.38851	-0.347071	-2.74298	0.021032	0.115014	-3.1616
293623	Rassf7	Ras association domain family member 7	-1.31235	0.617641	-2.74113	0.0210983	0.115067	-3.16443
298381	Echdc2	enoyl CoA hydratase domain containing 2	-1.5741	-0.499823	-2.74111	0.021099	0.115067	-3.16446
316034	Cnot10	CCR4-NOT transcription complex, subunit 10	-1.25574	-0.204762	-2.74124	0.0210943	0.115067	-3.16426
299346	Nudt14	nudix hydrolase 14	-1.32715	-0.356796	-2.73767	0.0212229	0.115608	-3.16974
304833	Ro60	Ro60, Y RNA binding protein	-1.67276	0.495984	-2.73787	0.0212157	0.115608	-3.16943
312616	Trnt1	tRNA nucleotidyl transferase 1	-1.78687	-0.273025	-2.7381	0.0212076	0.115608	-3.16909
298841	Atraid	all-trans retinoic acid-induced differentiation factor	-1.37429	0.162492	-2.73566	0.0212958	0.11596	-3.17283
315530	Arhgap32	Rho GTPase activating protein 32	-1.55617	0.181607	-2.73407	0.0213536	0.116103	-3.17527
360652	Sdk2	sidekick cell adhesion molecule 2	-1.63529	-0.0310322	-2.73453	0.0213368	0.116103	-3.17456
100912248	LOC100912248	uncharacterized LOC100912248	-1.57162	0.161161	-2.73357	0.0213716	0.116103	-3.17603
108351200	LOC108351200	uncharacterized LOC108351200	-1.29835	0.201097	-2.73393	0.0213585	0.116103	-3.17548
313929	Ncoa1	nuclear receptor coactivator 1	-1.54251	-0.420189	-2.73261	0.0214068	0.11625	-3.17751
297459	Mrps25	mitochondrial ribosomal protein S25	-2.19334	-0.274828	-2.73189	0.021433	0.11632	-3.17861
360552	Pelp1	proline, glutamate and leucine rich protein 1	-1.34636	0.101248	-2.7315	0.0214471	0.116334	-3.1792
300994	Ifrd2	interferon-related developmental regulator 2	-1.33015	0.645291	-2.73071	0.0214763	0.116402	-3.18043
499914	Gins1	GINS complex subunit 1	-1.6358	-0.0450294	-2.73091	0.0214688	0.116402	-3.18012
24780	Slc4a2	solute carrier family 4 member 2	-1.22984	0.492891	-2.7281	0.0215718	0.116449	-3.18443
171445	Akr7a2	aldo-keto reductase family 7, member A2	-1.20983	-0.52113	-2.72947	0.0215216	0.116449	-3.18233
288617	Tpst1	tyrosylprotein sulfotransferase 1	-1.27632	0.086693	-2.72732	0.0216006	0.116449	-3.18563
290363	Rcbtb2	RCC1 and BTB domain containing protein 2	-1.34433	-0.646455	-2.72851	0.0215566	0.116449	-3.18379
293551	Arl6ip1	ADP-ribosylation factor like GTPase 6 interacting protein 1	-1.56689	-0.0749201	-2.72894	0.0215412	0.116449	-3.18315
298185	Frem1	Fras1 related extracellular matrix 1	-1.49229	0.678845	-2.72989	0.0215063	0.116449	-3.18169
303194	Top3a	DNA topoisomerase III alpha	-1.75	0.285022	-2.72907	0.0215363	0.116449	-3.18294
315500	Eepd1	endonuclease/exonuclease/phosphatase family domain containing 1	-1.19788	-0.731308	-2.72736	0.0215992	0.116449	-3.18557
365813	Trim59	tripartite motif-containing 59	-1.63567	-0.462712	-2.72775	0.0215848	0.116449	-3.18497
100362333	LOC100362333	DNA-directed DNA polymerase epsilon 3	-1.68571	0.381108	-2.72828	0.0215653	0.116449	-3.18416
310306	Usp13	ubiquitin specific peptidase 13	-1.42589	0.43471	-2.72682	0.021619	0.116458	-3.1864
315158	Zc3h7b	zinc finger CCCH-type containing 7B	-1.47054	-0.635815	-2.72682	0.0216188	0.116458	-3.18639
361846	Vps26a	VPS26 retromer complex component A	-1.77101	-0.471181	-2.72649	0.0216311	0.116476	-3.1869
363484	Chic1	cysteine-rich hydrophobic domain 1	-1.55297	-0.460331	-2.72467	0.0216984	0.116707	-3.1897
679155	Zbtb7c	zinc finger and BTB domain containing 7C	-1.60355	0.793783	-2.72441	0.0217079	0.116713	-3.19009
363018	Cep295	centrosomal protein 295	-1.61916	0.210564	-2.7236	0.0217377	0.116784	-3.19133
499380	Emx2	empty spiracles homeobox 2	-1.69318	0.261016	-2.72163	0.0218111	0.117	-3.19437
81524	Nf1x	nuclear factor 1 X	-1.22794	-0.0842556	-2.72122	0.0218263	0.117036	-3.19499
64646	Hist3h2a	histone cluster 3, H2a	-1.58458	-0.214505	-2.72052	0.0218522	0.117131	-3.19606
301345	Cnnm3	cyclin and CBS domain divalent metal cation transport mediator 3	-1.70611	-0.279408	-2.72006	0.0218694	0.117178	-3.19677
680424	Pex10	peroxisomal biogenesis factor 10	-1.30672	-0.58765	-2.71969	0.0218831	0.117207	-3.19733
192234	Eif2b5	eukaryotic translation initiation factor 2B subunit epsilon	-1.33957	-0.326392	-2.71714	0.0219786	0.117674	-3.20125
300035	Pycr3	pyrroline-5-carboxylate reductase 3	-1.31409	0.0146717	-2.71248	0.0221536	0.118385	-3.20839
24382	Ganc	glucosidase, alpha; neutral C	-1.57614	-0.521953	-2.71206	0.0221697	0.118426	-3.20905
24747	RT1-M3-1	RT1 class Ib, locus M3, gene 1	-1.26766	-0.551535	-2.71133	0.0221973	0.118529	-3.21017
308758	Hddc3	HD domain containing 3	-1.30654	-0.563435	-2.70958	0.0222633	0.118791	-3.21284
685839	Dnajb7	DnaJ heat shock protein family (Hsp40) member B7	-1.84469	0.312463	-2.70979	0.0222555	0.118791	-3.21253
103693036	LOC103693036	ATP synthase F(0) complex subunit C1, mitochondrial pseudogene	-1.80576	0.558198	-2.70925	0.022276	0.118814	-3.21336
307845	Mtss1l	MTSS1L, I-BAR domain containing	-1.31852	1.11222	-2.70847	0.0223054	0.118926	-3.21454
24267	Comt	catechol-O-methyltransferase	-1.6131	0.342303	-2.70731	0.0223498	0.119117	-3.21633
362336	Fam180a	family with sequence similarity 180, member A	-1.76688	0.156695	-2.70673	0.0223716	0.119188	-3.21721
444984	Dnmt3a	DNA methyltransferase 3 alpha	-1.60728	0.736052	-2.70626	0.0223898	0.11924	-3.21795
245977	Adgrf5	adhesion G protein-coupled receptor F5	-1.36172	-0.293226	-2.70574	0.0224097	0.119255	-3.21874
84016	Grip1	glutamate receptor interacting protein 1	-1.50424	-0.504955	-2.70311	0.0225102	0.119384	-3.22277
297065	Zfp282	zinc finger protein 282	-1.43748	0.408895	-2.70454	0.0224552	0.119384	-3.22057
305354	Tlr1	toll-like receptor 1	-1.70431	0.124488	-2.70449	0.0224572	0.119384	-3.22065
362485	Ccne2	cyclin E2	-1.57496	-0.00645043	-2.70351	0.0224949	0.119384	-3.22216
367214	Oard1	O-acyl-ADP-ribose deacylase 1	-1.56764	-0.130862	-2.70325	0.0225048	0.119384	-3.22255
407765	St6galnac6	ST6 N-acetylgalactosaminide alpha-2,6-sialyltransferase 6	-1.44671	-0.164147	-2.7037	0.0224874	0.119384	-3.22186
308795	Tlnrd1	talin rod domain containing 1	-1.73765	0.680461	-2.70176	0.0225622	0.119569	-3.22485
81685	Mlh1	mutL homolog 1	-1.61516	0.114687	-2.70087	0.0225963	0.11964	-3.22621
298369	Osbpl9	oxysterol binding protein-like 9	-1.27169	-0.24196	-2.70032	0.0226174	0.11964	-3.22705
313166	Nfx1	nuclear transcription factor, X-box binding 1	-1.26117	0.0959856	-2.70004	0.0226282	0.11964	-3.22748
360595	Rnft1	ring finger protein, transmembrane 1	-1.55045	0.315021	-2.70021	0.0226218	0.11964	-3.22722
364637	Fbxo25	F-box protein 25	-1.48275	0.0276422	-2.69986	0.0226351	0.11964	-3.22775
117103	Rab8a	RAB8A, member RAS oncogene family	-1.52728	0.543328	-2.69884	0.0226746	0.119759	-3.22932
309586	Trim26	tripartite motif-containing 26	-1.39804	-0.168096	-2.6983	0.0226955	0.119779	-3.23015
499425	Zfp365	zinc finger protein 365	-1.37301	0.230248	-2.69693	0.0227484	0.119923	-3.23224
29475	Dio3	iodothyronine deiodinase 3	-1.75341	0.163798	-2.69612	0.02278	0.120009	-3.23349
297705	Aebp2	AE binding protein 2	-1.2704	-0.544773	-2.69607	0.0227816	0.120009	-3.23356
64638	Rpl28	ribosomal protein L28	-1.30048	-0.811782	-2.69535	0.0228099	0.12008	-3.23468
83685	Capn6	calpain 6	-1.40269	-0.20517	-2.69513	0.0228184	0.12008	-3.23501
500054	Pot1	protection of telomeres 1	-1.21228	-0.464294	-2.69507	0.0228208	0.12008	-3.23511
286985	Vom2r31	vomeronasal 2 receptor, 31	-1.70133	-0.259182	-2.69397	0.0228634	0.120214	-3.23678
300225	Fmnl3	formin-like 3	-1.55618	0.0360431	-2.69253	0.0229197	0.12042	-3.239
24638	Pfkfb1	6-phosphofructo-2-kinase/fructose-2,6-biphosphatase 1	-1.80852	0.162238	-2.69195	0.0229424	0.120495	-3.23989
292844	Siglec10	sialic acid binding Ig-like lectin 10	-1.2089	-0.479689	-2.69115	0.0229735	0.120613	-3.24111
85434	Cdc5l	cell division cycle 5-like	-1.48467	-0.641389	-2.69075	0.0229893	0.120651	-3.24173
687797	Tmem233	transmembrane protein 233	-1.47636	0.36162	-2.6903	0.0230069	0.120653	-3.24242
114554	Pi4k2a	phosphatidylinositol 4-kinase type 2 alpha	-1.3437	0.222841	-2.68914	0.0230524	0.120802	-3.24419
25152	Map1a	microtubule-associated protein 1A	-1.51419	0.211234	-2.68766	0.0231105	0.120911	-3.24646
192209	Spdya	speedy/RINGO cell cycle regulator family member A	-1.27812	-0.34441	-2.68564	0.0231903	0.120911	-3.24956
192241	Atp5po	ATP synthase peripheral stalk subunit OSCP	-1.30514	-0.817663	-2.68688	0.0231412	0.120911	-3.24765
306376	Sh2d4a	SH2 domain containing 4A	-1.30571	-0.128572	-2.68559	0.0231924	0.120911	-3.24964
311245	Traf6	TNF receptor associated factor 6	-1.60932	0.737348	-2.68578	0.0231847	0.120911	-3.24934
362302	Abcb8	ATP binding cassette subfamily B member 8	-1.51826	0.613131	-2.68604	0.0231744	0.120911	-3.24894
102548682	LOC102548682	histone H4-like	-1.7765	-0.0560222	-2.68571	0.0231877	0.120911	-3.24946
84473	Ddx20	DEAD-box helicase 20	-1.45896	-0.297603	-2.68409	0.0232516	0.121034	-3.25194
297910	Slc26a7	solute carrier family 26 member 7	-1.36103	-0.88402	-2.68435	0.0232412	0.121034	-3.25153
309444	Fbxw4	F-box and WD repeat domain containing 4	-1.35227	-0.299544	-2.68421	0.0232471	0.121034	-3.25176
406163	Gpsm3	G-protein signaling modulator 3	-1.56816	-0.547326	-2.6833	0.0232829	0.121097	-3.25314
266706	Gjc1	gap junction protein, gamma 1	-1.5404	-0.0259798	-2.68232	0.023322	0.121176	-3.25466
304201	Evi5l	ecotropic viral integration site 5-like	-1.46316	0.241978	-2.68239	0.0233192	0.121176	-3.25455
296911	ST7	suppression of tumorigenicity 7	-1.4936	0.708958	-2.68154	0.0233529	0.121247	-3.25585
29194	Chka	choline kinase alpha	-1.24701	0.836434	-2.681	0.0233744	0.121314	-3.25667
116679	Cgrrf1	cell growth regulator with ring finger domain 1	-1.20767	-0.645362	-2.67918	0.0234471	0.121557	-3.25947
100359861	Smim15	small integral membrane protein 15	-1.20508	-0.45751	-2.67878	0.023463	0.121595	-3.26008
360793	Rhbdd2	rhomboid domain containing 2	-1.17765	-0.239855	-2.67762	0.0235093	0.1217	-3.26185
25019	Xrcc6	X-ray repair cross complementing 6	-1.39436	0.457338	-2.67637	0.0235597	0.121738	-3.26378
63995	Dusp10	dual specificity phosphatase 10	-1.3291	-0.294779	-2.67621	0.0235658	0.121738	-3.26401
287715	Wnk4	WNK lysine deficient protein kinase 4	-1.25433	-0.000268543	-2.67651	0.0235541	0.121738	-3.26356
310803	Extl2	exostosin-like glycosyltransferase 2	-1.25447	-0.496427	-2.67695	0.0235364	0.121738	-3.26289
361571	Aldh16a1	aldehyde dehydrogenase 16 family, member A1	-1.52213	-0.114319	-2.67651	0.0235539	0.121738	-3.26355
85493	Abcf1	ATP binding cassette subfamily F member 1	-1.1908	0.747272	-2.67559	0.0235909	0.121809	-3.26497
309051	Pign	phosphatidylinositol glycan anchor biosynthesis, class N	-1.52791	0.091598	-2.67489	0.0236191	0.121848	-3.26604
362817	Cdk2	cyclin dependent kinase 2	-1.43171	0.440233	-2.67475	0.0236245	0.121848	-3.26625
84580	Hdac5	histone deacetylase 5	-1.28768	0.219516	-2.67426	0.0236444	0.121861	-3.267
296219	Nxt1	nuclear transport factor 2-like export factor 1	-1.60525	0.358223	-2.67437	0.0236401	0.121861	-3.26684
688972	Gypa	glycophorin A	-1.38719	-0.111671	-2.67316	0.0236888	0.122045	-3.26869
290876	LOC290876	similar to RIKEN cDNA 1700029H14	-1.42084	-0.453234	-2.67111	0.0237717	0.122338	-3.27184
100909904	LOC100909904	uncharacterized LOC100909904	-1.20169	0.785787	-2.66995	0.0238188	0.122491	-3.27362
286897	Dpy30	dpy-30 histone methyltransferase complex regulatory subunit	-1.76249	-0.313503	-2.6693	0.0238451	0.122536	-3.27461
690050	Tpmt	thiopurine S-methyltransferase	-1.26981	-0.737853	-2.66807	0.0238952	0.122749	-3.2765
79125	Anxa6	annexin A6	-1.16087	0.918472	-2.66756	0.0239161	0.122773	-3.27728
365386	RGD1559948	hypothetical gene supported by X51706	-1.30282	-0.121291	-2.66731	0.023926	0.122773	-3.27765
24771	Sdc4	syndecan 4	-1.56656	0.359816	-2.66599	0.0239799	0.122998	-3.27968
288233	Wrb	tryptophan rich basic protein	-1.34393	-0.135185	-2.66559	0.0239962	0.122998	-3.28029
498174	Nipsnap2	nipsnap homolog 2	-1.25623	-0.191493	-2.66561	0.0239954	0.122998	-3.28026
27137	Eif2ak1	eukaryotic translation initiation factor 2 alpha kinase 1	-1.26786	0.0860619	-2.66482	0.024028	0.123027	-3.28148
311362	Frmd5	FERM domain containing 5	-1.33895	-0.171168	-2.66499	0.0240209	0.123027	-3.28121
366595	Sypl1	synaptophysin-like 1	-1.64406	-0.07155	-2.6652	0.0240122	0.123027	-3.28089
306734	Rmi1	RecQ mediated genome instability 1	-1.20482	0.229659	-2.66404	0.0240599	0.123145	-3.28267
303396	Appbp2	amyloid beta precursor protein binding protein 2	-1.69452	-0.0687917	-2.66245	0.0241249	0.123433	-3.2851
297757	Sbspon	somatomedin B and thrombospondin, type 1 domain containing	-1.80009	-0.47916	-2.66177	0.0241529	0.123531	-3.28614
261736	Cops2	COP9 signalosome subunit 2	-1.2029	-0.452381	-2.6611	0.0241805	0.123627	-3.28717
25627	Cma1	chymase 1	-1.38819	0.0654407	-2.65985	0.024232	0.123634	-3.28908
140728	Cacng7	calcium voltage-gated channel auxiliary subunit gamma 7	-1.70348	0.108849	-2.65895	0.0242696	0.123634	-3.29048
291824	Tk2	thymidine kinase 2, mitochondrial	-1.21626	-0.26944	-2.66028	0.0242144	0.123634	-3.28843
294326	Gatd3a	glutamine amidotransferase like class 1 domain containing 3A	-1.21112	-0.278122	-2.65881	0.0242753	0.123634	-3.29069
303342	Ssh2	slingshot protein phosphatase 2	-1.8564	0.065611	-2.65873	0.0242785	0.123634	-3.2908
310687	Prcc	proline rich mitotic checkpoint control factor	-1.53853	-0.333478	-2.65929	0.0242555	0.123634	-3.28995
100361389	Fam171a2	family with sequence similarity 171, member A2	-1.30687	0.177681	-2.65978	0.0242353	0.123634	-3.2892
171137	Khsrp	KH-type splicing regulatory protein	-1.2927	0.511765	-2.65824	0.0242989	0.123693	-3.29156
25104	Pc	pyruvate carboxylase	-1.25596	-0.302514	-2.6548	0.0244417	0.123895	-3.29683
64472	Naa35	N(alpha)-acetyltransferase 35, NatC auxiliary subunit	-1.19878	-0.768076	-2.65546	0.0244142	0.123895	-3.29581
171121	Ppp6c	protein phosphatase 6, catalytic subunit	-1.40402	0.0771097	-2.65542	0.0244157	0.123895	-3.29587
294337	Col6a1	collagen type VI alpha 1 chain	-1.78436	-0.29677	-2.65614	0.024386	0.123895	-3.29478
312640	Emc3	ER membrane protein complex subunit 3	-1.54565	-0.254992	-2.65612	0.0243869	0.123895	-3.29481
363172	Lars2	leucyl-tRNA synthetase 2, mitochondrial	-1.48306	-0.27372	-2.6552	0.0244249	0.123895	-3.29621
501702	Cenpv	centromere protein V	-1.30065	-0.742581	-2.65453	0.024453	0.123895	-3.29724
689055	Rad51ap1	RAD51 associated protein 1	-1.33449	0.535493	-2.65558	0.0244093	0.123895	-3.29563
690043	Rnf168	ring finger protein 168	-1.52067	0.0371137	-2.65506	0.0244307	0.123895	-3.29642
84357	Sh3kbp1	SH3 domain-containing kinase-binding protein 1	-1.43955	-0.164856	-2.65393	0.0244777	0.123975	-3.29815
310856	Ppa2	pyrophosphatase (inorganic) 2	-1.64208	0.0187119	-2.65195	0.0245607	0.124261	-3.30119
499660	Sprr1a	small proline-rich protein 1A	-1.77722	-0.111638	-2.65062	0.0246163	0.124498	-3.30322
287115	Pgp	phosphoglycolate phosphatase	-1.38132	0.751279	-2.64993	0.0246455	0.124556	-3.30429
619580	Ctps2	CTP synthase 2	-1.19528	-0.67695	-2.64859	0.0247019	0.124796	-3.30634
297498	Crbn	cereblon	-1.42886	-0.160486	-2.64664	0.0247838	0.12512	-3.30932
300659	Rnf26	ring finger protein 26	-1.54084	0.277875	-2.64669	0.0247819	0.12512	-3.30925
25541	Scp2	sterol carrier protein 2	-1.17288	0.0396372	-2.64593	0.024814	0.125176	-3.31042
290706	Hpf1	histone PARylation factor 1	-1.36547	-0.743283	-2.64575	0.0248217	0.125176	-3.31069
170917	Cry2	cryptochrome circadian regulator 2	-1.24827	-0.362154	-2.64534	0.0248388	0.125196	-3.31131
296648	Mapkap1	mitogen-activated protein kinase associated protein 1	-1.56275	0.170435	-2.64439	0.0248789	0.125196	-3.31276
301373	Tgfbrap1	transforming growth factor, beta receptor associated protein 1	-1.46675	-0.33654	-2.64443	0.0248773	0.125196	-3.31271
313668	Ddi2	DNA damage inducible 1 homolog 2	-1.69031	-0.282722	-2.64453	0.0248732	0.125196	-3.31255
316033	Glb1	galactosidase, beta 1	-1.46605	-0.339883	-2.64474	0.0248644	0.125196	-3.31224
366016	Nup188	nucleoporin 188	-1.66608	0.117799	-2.64511	0.0248486	0.125196	-3.31167
170925	Slco6b1	solute carrier organic anion transporter family member 6B1	-1.42038	0.287869	-2.6441	0.0248914	0.125214	-3.31321
117560	Klf9	Kruppel-like factor 9	-1.28622	0.338922	-2.64364	0.0249108	0.125262	-3.31391
364837	Gypc	glycophorin C (Gerbich blood group)	-1.71397	0.433468	-2.64325	0.0249276	0.125262	-3.31452
311847	Dolk	dolichol kinase	-1.48498	-0.354037	-2.64234	0.0249663	0.125279	-3.31591
361070	Xpo7	exportin 7	-1.21331	-0.866021	-2.64265	0.024953	0.125279	-3.31544
362630	Srsf10	serine and arginine rich splicing factor 10	-1.30716	-0.0634764	-2.64233	0.0249668	0.125279	-3.31593
308410	Rtn2	reticulon 2	-1.27201	-0.227355	-2.64203	0.0249794	0.125298	-3.31639
170944	Dkc1	dyskerin pseudouridine synthase 1	-1.30976	0.262237	-2.64142	0.0250053	0.125383	-3.31731
291921	N4bp1	Nedd4 binding protein 1	-1.19317	0.416029	-2.64068	0.025037	0.12543	-3.31845
299104	Fkbp3	FKBP prolyl isomerase 3	-1.43643	0.231399	-2.64016	0.0250592	0.12543	-3.31925
303185	Flcn	folliculin	-1.65768	-0.296291	-2.6407	0.0250362	0.12543	-3.31843
363210	Phf3	PHD finger protein 3	-1.64653	-0.0523649	-2.64022	0.0250564	0.12543	-3.31915
25592	Agrn	agrin	-1.27732	0.294446	-2.63857	0.0251271	0.125502	-3.32168
117098	Pdha2	pyruvate dehydrogenase E1 alpha 2 subunit	-1.64254	0.19224	-2.63857	0.0251272	0.125502	-3.32168
298982	Maea	macrophage erythroblast attacher	-1.33732	0.0163223	-2.63857	0.0251272	0.125502	-3.32169
305171	Lin54	lin-54 DREAM MuvB core complex component	-1.58622	0.144579	-2.63889	0.0251134	0.125502	-3.32119
312320	Igf2bp3	insulin-like growth factor 2 mRNA binding protein 3	-1.34569	0.478144	-2.63929	0.0250961	0.125502	-3.32057
365592	Pdss2	decaprenyl diphosphate synthase subunit 2	-1.46734	-0.0900247	-2.63898	0.0251096	0.125502	-3.32106
291295	Rbm17	RNA binding motif protein 17	-1.63674	0.262294	-2.63788	0.0251567	0.125605	-3.32274
361047	Ska3	spindle and kinetochore associated complex subunit 3	-1.64941	0.116321	-2.63488	0.0252857	0.126159	-3.32733
362111	Sh2d3c	SH2 domain containing 3C	-1.39095	0.230862	-2.63433	0.0253094	0.126233	-3.32818
304862	Tpr	translocated promoter region, nuclear basket protein	-1.21081	0.310194	-2.63337	0.0253509	0.126395	-3.32965
313615	Paqr7	progestin and adipoQ receptor family member 7	-1.47804	0.0579726	-2.63181	0.0254182	0.126518	-3.33203
29391	Tsx	testis specific X-linked gene	-1.57483	-0.163574	-2.63153	0.0254302	0.126521	-3.33245
500993	RGD1563941	similar to hypothetical protein FLJ20010	-1.30064	0.251625	-2.63104	0.0254514	0.126582	-3.3332
305600	Fancl	FA complementation group L	-1.42492	-0.275238	-2.6303	0.0254837	0.126698	-3.33434
308976	Kdm8	lysine demethylase 8	-1.49193	0.325737	-2.63	0.0254969	0.126719	-3.33481
316249	Enpp5	ectonucleotide pyrophosphatase/phosphodiesterase 5	-1.81285	0.0114028	-2.62837	0.0255677	0.127026	-3.3373
64557	Bard1	BRCA1 associated RING domain 1	-1.48768	0.28731	-2.62676	0.0256381	0.12733	-3.33977
83501	Cdh2	cadherin 2	-1.22355	-0.886392	-2.62621	0.0256617	0.127358	-3.3406
290234	Dhrs1	dehydrogenase/reductase 1	-1.374	0.40804	-2.62432	0.0257446	0.127598	-3.34349
681896	Slc25a18	solute carrier family 25 member 18	-1.32089	0.260392	-2.62408	0.0257554	0.127598	-3.34387
81738	Nup98	nucleoporin 98	-1.64588	0.16072	-2.62292	0.0258063	0.127691	-3.34564
302415	Foxo4	forkhead box O4	-1.36757	0.104402	-2.6229	0.0258071	0.127691	-3.34567
306203	Pxk	PX domain containing serine/threonine kinase	-1.64757	0.0305322	-2.62217	0.025839	0.127787	-3.34678
293854	Srpk3	SRSF protein kinase 3	-1.69834	0.483021	-2.6212	0.0258819	0.127954	-3.34827
292267	Armt1	acidic residue methyltransferase 1	-1.2265	-0.316131	-2.61983	0.0259426	0.128119	-3.35037
305884	Acin1	apoptotic chromatin condensation inducer 1	-1.4312	0.222794	-2.61988	0.0259401	0.128119	-3.35028
361991	S100a16	S100 calcium binding protein A16	-1.24739	0.623323	-2.62022	0.0259252	0.128119	-3.34977
25166	Casp1	caspase 1	-1.33468	-0.541974	-2.61953	0.0259555	0.128138	-3.35082
25394	Bfsp1	beaded filament structural protein 1	-1.52335	0.159239	-2.6174	0.0260501	0.128409	-3.35409
300849	Fbxo9	f-box protein 9	-1.2095	0.577456	-2.61734	0.0260527	0.128409	-3.35418
305467	Sfi1	SFI1 centrin binding protein	-1.4091	-0.325193	-2.61806	0.0260206	0.128409	-3.35307
307842	Vac14	Vac14, PIKFYVE complex component	-1.47176	0.451873	-2.61623	0.0261022	0.128546	-3.35588
29215	Arg2	arginase 2	-1.22381	0.27764	-2.61551	0.0261343	0.128614	-3.35698
499615	Lhfpl6	LHFPL tetraspan subfamily member 6	-1.18759	0.25903	-2.61417	0.026194	0.128773	-3.35903
287150	Fam173a	family with sequence similarity 173, member A	-1.44869	0.331596	-2.61262	0.0262631	0.128942	-3.3614
292756	Pak4	p21 (RAC1) activated kinase 4	-1.31974	-0.0602911	-2.6129	0.0262506	0.128942	-3.36097
314465	Ppp1r13b	protein phosphatase 1, regulatory subunit 13B	-1.27043	-0.420698	-2.61243	0.0262715	0.128942	-3.36168
300125	Ttc38	tetratricopeptide repeat domain 38	-1.32306	-0.56519	-2.61075	0.0263469	0.129208	-3.36425
246097	Fas	Fas cell surface death receptor	-1.23861	-0.85975	-2.61049	0.0263585	0.12922	-3.36465
362556	Ttc4	tetratricopeptide repeat domain 4	-1.40788	0.0535673	-2.60992	0.0263843	0.12927	-3.36553
102550246	LOC102550246	uncharacterized LOC102550246	-1.24914	-0.0994943	-2.60986	0.026387	0.12927	-3.36562
309420	Fam122a	family with sequence similarity 122A	-1.36378	0.145272	-2.60862	0.0264427	0.12943	-3.36751
171575	Dnase2	deoxyribonuclease 2, lysosomal	-1.23302	-0.366226	-2.60582	0.0265691	0.12953	-3.37179
307480	Dele1	DAP3 binding cell death enhancer 1	-1.33056	-0.529658	-2.60708	0.0265123	0.12953	-3.36987
313278	Ptprd	protein tyrosine phosphatase, receptor type, D	-1.13538	0.591294	-2.60655	0.0265361	0.12953	-3.37068
360618	Ormdl3	ORMDL sphingolipid biosynthesis regulator 3	-1.72509	-0.0437641	-2.6046	0.0266244	0.12953	-3.37366
361035	Mettl3	methyltransferase-like 3	-1.55606	-0.497937	-2.60584	0.0265685	0.12953	-3.37177
361443	Ntpcr	nucleoside-triphosphatase, cancer-related	-1.13527	-0.83606	-2.60716	0.0265084	0.12953	-3.36974
498234	Arl8a	ADP-ribosylation factor like GTPase 8A	-1.67315	-0.236079	-2.60492	0.0266097	0.12953	-3.37317
500359	RGD1561551	similar to Hypothetical protein MGC75664	-1.20227	-0.117393	-2.60665	0.0265318	0.12953	-3.37053
683402	Ap3s2	adaptor related protein complex 3 subunit sigma 2	-1.21589	-0.24862	-2.60468	0.0266209	0.12953	-3.37354
100362458	Gigyf2	GRB10 interacting GYF protein 2	-1.21995	0.300943	-2.60573	0.0265732	0.12953	-3.37193
291983	Psmb10	proteasome subunit beta 10	-1.197	-0.0966129	-2.60249	0.0267204	0.12989	-3.37689
294258	Nelfe	negative elongation factor complex member E	-1.57171	0.0870391	-2.60268	0.0267115	0.12989	-3.37659
362335	Nup205	nucleoporin 205	-1.47743	-0.243475	-2.60134	0.0267729	0.130028	-3.37865
24499	Il6r	interleukin 6 receptor	-1.27934	-0.166887	-2.60096	0.0267902	0.130031	-3.37923
309172	Frmd8	FERM domain containing 8	-1.63659	0.527243	-2.60092	0.026792	0.130031	-3.37929
498390	Zfp518b	zinc finger protein 518B	-1.28504	-0.0218098	-2.60056	0.0268085	0.130066	-3.37984
56266	Cyp4f1	cytochrome P450, family 4, subfamily f, polypeptide 1	-1.30583	-0.0399596	-2.59898	0.0268808	0.130372	-3.38226
64681	Mvp	major vault protein	-1.38197	0.191466	-2.59848	0.0269036	0.130393	-3.38302
25262	Itpr1	inositol 1,4,5-trisphosphate receptor, type 1	-1.21814	0.921796	-2.59814	0.026919	0.130422	-3.38354
301415	Ankrd44	ankyrin repeat domain 44	-1.39293	-0.0372236	-2.59755	0.0269464	0.13051	-3.38445
24931	Cd8b	CD8b molecule	-1.64524	0.356671	-2.59655	0.026992	0.130686	-3.38596
81507	Bmpr1a	bone morphogenetic protein receptor type 1A	-1.33277	0.439448	-2.59594	0.0270202	0.130777	-3.3869
304157	Nrip1	nuclear receptor interacting protein 1	-1.57005	-0.258692	-2.59493	0.027067	0.130945	-3.38845
310537	RGD1560010	RGD1560010	-1.45016	0.0714954	-2.5933	0.0271422	0.131187	-3.39094
362170	Api5	apoptosis inhibitor 5	-1.54642	0.30882	-2.59338	0.0271382	0.131187	-3.39081
83580	Thbd	thrombomodulin	-1.51637	0.604328	-2.59223	0.0271916	0.131336	-3.39258
79251	Aspa	aspartoacylase	-1.45072	0.600119	-2.59114	0.0272422	0.131535	-3.39425
114845	Klf3	Kruppel like factor 3	-1.15367	0.785504	-2.59074	0.0272605	0.131567	-3.39485
498587	Ldb3	LIM domain binding 3	-1.28811	0.763334	-2.59059	0.0272674	0.131567	-3.39508
362012	Strip1	striatin interacting protein 1	-1.4278	-0.66496	-2.58959	0.027314	0.131746	-3.39661
361802	Hsd17b8	hydroxysteroid (17-beta) dehydrogenase 8	-1.31831	-0.281961	-2.58757	0.027408	0.132018	-3.39969
363055	Cep164	centrosomal protein 164	-1.33618	0.227768	-2.58675	0.0274468	0.13216	-3.40095
315139	Tab1	TGF-beta activated kinase 1/MAP3K7 binding protein 1	-1.37109	-0.584699	-2.58632	0.0274667	0.132211	-3.40161
303604	Map3k3	mitogen activated protein kinase kinase kinase 3	-1.51955	0.469217	-2.58532	0.0275133	0.132344	-3.40313
54270	Mcpt4	mast cell protease 4	-1.50827	-0.00696943	-2.58429	0.0275621	0.132488	-3.40472
84349	Cd40lg	CD40 ligand	-1.33832	-0.340609	-2.58433	0.0275598	0.132488	-3.40464
116740	B3gnt5	UDP-GlcNAc:betaGal beta-1,3-N-acetylglucosaminyltransferase 5	-1.22658	-0.603614	-2.58353	0.0275977	0.132603	-3.40587
307585	Cables1	Cdk5 and Abl enzyme substrate 1	-1.19249	0.419045	-2.58318	0.0276142	0.132603	-3.40641
25022	Fgfr2	fibroblast growth factor receptor 2	-1.20547	-0.475631	-2.58139	0.0276982	0.132784	-3.40913
301323	Prim2	DNA primase subunit 2	-1.5026	0.226299	-2.58147	0.0276947	0.132784	-3.40902
304763	R3hdm1	R3H domain containing 1	-1.17672	-0.150307	-2.58177	0.0276805	0.132784	-3.40856
362367	Znrf2	zinc and ring finger 2	-1.44929	0.101301	-2.58134	0.0277006	0.132784	-3.40921
363640	Olr1493	olfactory receptor gene Olr1493	-1.29905	0.293662	-2.58105	0.0277143	0.132784	-3.40966
300208	Ddx23	DEAD-box helicase 23	-1.14481	0.0596428	-2.5781	0.0278538	0.133179	-3.41416
498331	Ptpn13	protein tyrosine phosphatase, non-receptor type 13	-1.35052	0.67827	-2.57817	0.0278508	0.133179	-3.41406
619573	Fam104a	family with sequence similarity 104, member A	-1.59018	-0.249067	-2.57823	0.0278478	0.133179	-3.41396
290831	Nsd3	nuclear receptor binding SET domain protein 3	-1.37998	0.413551	-2.57752	0.0278814	0.133196	-3.41505
363153	Arpp21	cAMP regulated phosphoprotein 21	-1.78965	0.242929	-2.57736	0.0278892	0.133196	-3.4153
50689	Mapk3	mitogen activated protein kinase 3	-1.33623	0.0411106	-2.57584	0.0279616	0.133315	-3.41762
245924	Scaf4	SR-related CTD-associated factor 4	-1.76216	0.508038	-2.57603	0.0279523	0.133315	-3.41732
499156	Gas2	growth arrest-specific 2	-1.31794	-0.373269	-2.57619	0.0279446	0.133315	-3.41708
316440	Ino80d	INO80 complex subunit D	-1.70088	0.361678	-2.57481	0.0280107	0.133459	-3.41919
[truncated: 1,638 more rows]

## Sheet: TableS3_UpReg_TGFb1SCE_vs_TGF
Supplementary Table 3. List of 2,894 genes up-regulated in TGFβ1+SCE compared to TGFβ1-treated A7r5 cells
[truncated: 2,902 more rows]

[truncated: 13 more sheets: TableS4_DwReg_TGFb1SCE_vs_TGF, TableS5_UpReg_TGFb1SchB_vs_TG, TableS6_DwReg_TGFb1SchB_vs_TGFb, TableS7_UpReg_SCE_vs_Veh, TableS8_DwReg_SCE_vs_Veh, TableS9_UpReg_SchB_vs_Veh, TableS10_DwReg_SchB_Veh, rd, TableS11_SCE-effective, TableS12_SchB-effective, TableS13_UpTGFb1_DwTGFb1+SCE, TableS14_GSEA_DwSg_TGFb1_vs_Veh, TableS15_RELA_targetgene]
